# Supplementary material for: Comparing sources and analysis of uncertainty in consequential and attributional life cycle assessment: review of current practice and recommendations
Source: Springer Nature journal article supplement (doi:10.1007/s11367-019-01663-1), 2019-07-29
Supplement: MOESM1 [file 17020868]

## **Supplementary information for: Comparing sources and analysis of uncertainty in consequential and attributional life cycle assessment: Review of current practice and recommendations**

Nicole Bamber<sup>1\*</sup>, Ian Turner<sup>1</sup>, Vivek Arulnathan<sup>1</sup>, Yang Li<sup>1</sup>, Shiva Zargar Ershadi<sup>1</sup>, Alyssa Smart<sup>1</sup>, Nathan Pelletier<sup>1</sup>

<sup>1</sup>340, Fipke Centre for Innovative Research, 3247 University Way, University of British Columbia Okanagan, Kelowna, BC, V1V1V7.

\*[nbamber@mail.ubc.ca](mailto:nbamber@mail.ubc.ca). 1.416.432.4037

### **Supplementary information A: Citations for systematic review**

#### **1. International Journal of Life Cycle Assessment**

##### **1.1 Attributional life cycle assessment studies**

###### **1.1.1 Uncertainty analysis performed**

###### **1.1.1a Monte Carlo-like approaches**

- Akanuma Y, Selke SEM, Auras R (2014) A preliminary LCA case study: Comparison of different pathways to produce purified terephthalic acid suitable for synthesis of 100 % bio-based PET. *Int J Life Cycle Assess* 19:1238–1246 . doi: 10.1007/s11367-014-0725-2
- Aubin J, Fontaine C, Callier M, Roque D'Orbcastel E (2018) Blue mussel (*Mytilus edulis*) bouchot culture in Mont-St Michel Bay: potential mitigation effects on climate change and eutrophication. *Int J Life Cycle Assess* 23:1030–1041 . doi: 10.1007/s11367-017-1403-y
- Avadí A, Adrien R, Aramayo V, Fréon P (2018a) Environmental assessment of the Peruvian industrial hake fishery with LCA. *Int J Life Cycle Assess* 23:1126–1140 . doi: 10.1007/s11367-017-1364-1
- Avadí A, Corson MS, van der Werf HMG (2018b) Modelling environmental effects of selected agricultural management strategies with regional statistically based screening LCA. *Int J Life Cycle Assess* 23:12–25 . doi: 10.1007/s11367-017-1300-4
- Barr WJ, Landis AE (2018) Comparative life cycle assessment of a commercial algal multiproduct biorefinery and wild caught fishery for small pelagic fish. *Int J Life Cycle Assess* 23:1141–1150 . doi: 10.1007/s11367-017-1395-7
- Benveniste G, Perálvarez M, Higuera J, Carreras J (2018) Life cycle assessment of spectrally tunable light engines. *Int J Life Cycle Assess* 23:279–294 . doi: 10.1007/s11367-017-1313-z
- Bieda B, Grzesik K, Sala D, Gawel B (2015) Life cycle inventory processes of the integrated steel plant (ISP) in Krakow, Poland—coke production, a case study. *Int J Life Cycle Assess* 20:1089–1101 . doi: 10.1007/s11367-015-0904-9
- Biswas WK (2014) Carbon footprint and embodied energy assessment of a civil works program in a residential estate of Western Australia. *Int J Life Cycle Assess* 19:732–744 . doi: 10.1007/s11367-013-0681-2
- Cashion T, Hornborg S, Ziegler F, et al (2016) Review and advancement of the marine biotic resource use metric in seafood LCAs: a case study of Norwegian salmon feed. *Int J Life Cycle Assess* 21:1106–1120 . doi: 10.1007/s11367-016-1092-y
- Cespi D, Passarini F, Ciacci L, et al (2014) Heating systems LCA: Comparison of biomass-based appliances. *Int J Life Cycle Assess* 19:89–99 . doi: 10.1007/s11367-013-0611-3
- Chen X, Wilfart A, Puillet L, Aubin J (2017) A new method of biophysical allocation in LCA of livestock co-products: modeling metabolic energy requirements of body-tissue growth. *Int J Life Cycle Assess* 22:883–895 . doi: 10.1007/s11367-016-1201-y
- Choudhary S, Liang S, Cai H, et al (2014) Reference and functional unit can change bioenergy pathway choices. *Int J Life Cycle Assess* 19:796–805 . doi: 10.1007/s11367-013-0692-z

- Cottle DJ, Cowie AL (2016) Allocation of greenhouse gas production between wool and meat in the life cycle assessment of Australian sheep production. *Int J Life Cycle Assess* 21:820–830 . doi: 10.1007/s11367-016-1054-4
- de Léis CM, Cherubini E, Ruviaro CF, et al (2015) Carbon footprint of milk production in Brazil: a comparative case study. *Int J Life Cycle Assess* 20:46–60 . doi: 10.1007/s11367-014-0813-3
- de Simone Souza HH, Lima ÂMF, Esquerre KO, Kiperstok A (2017) Life cycle assessment of the environmental influence of wooden and concrete utility poles based on service lifetime. *Int J Life Cycle Assess* 22:2030–2041 . doi: 10.1007/s11367-017-1293-z
- Dhaliwal H, Browne M, Flanagan W, et al (2014) A life cycle assessment of packaging options for contrast media delivery: comparing polymer bottle vs. glass bottle. *Int J Life Cycle Assess* 19:1965–1973 . doi: 10.1007/s11367-014-0795-1
- do Carmo BBT, Margni M, Baptiste P (2017) Addressing uncertain scoring and weighting factors in social life cycle assessment. *Int J Life Cycle Assess* 22:1609–1617 . doi: 10.1007/s11367-017-1275-1
- Dong YH, Ng ST (2014) Comparing the midpoint and endpoint approaches based on ReCiPe - A study of commercial buildings in Hong Kong. *Int J Life Cycle Assess* 19:1409–1423 . doi: 10.1007/s11367-014-0743-0
- Duan H, Hu M, Zuo J, et al (2017) Assessing the carbon footprint of the transport sector in mega cities via streamlined life cycle assessment: a case study of Shenzhen, South China. *Int J Life Cycle Assess* 22:683–693 . doi: 10.1007/s11367-016-1187-5
- Ekeh O, Fangmeier A, Müller J (2014) Quantifying greenhouse gases from the production, transportation and utilization of charcoal in developing countries: A case study of Kampala, Uganda. *Int J Life Cycle Assess* 19:1643–1652 . doi: 10.1007/s11367-014-0765-7
- Ercan T, Tatari O (2015) A hybrid life cycle assessment of public transportation buses with alternative fuel options. *Int J Life Cycle Assess* 20:1213–1231 . doi: 10.1007/s11367-015-0927-2
- Escobar N, Ribal J, Clemente G, et al (2015) Uncertainty analysis in the financial assessment of an integrated management system for restaurant and catering waste in Spain. *Int J Life Cycle Assess* 20:1491–1510 . doi: 10.1007/s11367-015-0962-z
- Escobar Lanzuela N, Ribal Sanchís FJ, Rodrigo Señor A, et al (2015) Uncertainty analysis in the environmental assessment of an integrated management system for restaurant and catering waste in Spain. *Int J Life Cycle Assess* 20:244–262 . doi: 10.1007/s11367-014-0825-z
- Fantke P, Jolliet O (2016) Life cycle human health impacts of 875 pesticides. *Int J Life Cycle Assess* 21:722–733 . doi: 10.1007/s11367-015-0910-y
- Fréon P, Avadí A, Vinatea Chavez RA, Iriarte Ahón F (2014) Life cycle assessment of the Peruvian industrial anchoveta fleet: Boundary setting in life cycle inventory analyses of complex and plural means of production. *Int J Life Cycle Assess* 19:1068–1086 . doi: 10.1007/s11367-014-0716-3
- Fuc P, Kurczewski P, Lewandowska A, et al (2016) An environmental life cycle assessment of forklift operation: a well-to-wheel analysis. *Int J Life Cycle Assess* 21:1438–1451 . doi: 10.1007/s11367-016-1104-y
- Galle W, De Temmerman N, Allacker K, De Meyer R (2017) Geometric service life modelling and discounting, a practical method for parametrised life cycle assessment. *Int J Life Cycle Assess* 22:1191–1209 . doi: 10.1007/s11367-016-1230-6
- Gül S, Spielmann M, Lehmann A, et al (2015) Benchmarking and environmental performance classes in life cycle assessment—development of a procedure for non-leather shoes in the context of the Product Environmental Footprint. *Int J Life Cycle Assess* 20:1640–1648 . doi: 10.1007/s11367-015-0975-7
- Günkaya Z, Banar M (2016) An environmental comparison of biocomposite film based on orange peel-derived pectin jelly-corn starch and LDPE film: LCA and biodegradability. *Int J Life Cycle Assess* 21:465–475 . doi: 10.1007/s11367-016-1042-8
- Gursel AP, Ostertag C (2017) Comparative life-cycle impact assessment of concrete manufacturing in Singapore. *Int J Life Cycle Assess* 22:237–255 . doi: 10.1007/s11367-016-1149-y
- Henriksson PJG, Zhang W, Guinée JB (2015) Updated unit process data for coal-based energy in China including parameters for overall dispersions. *Int J Life Cycle Assess* 20:185–195 . doi: 10.1007/s11367-014-0816-0

- Hong J, Han X, Chen Y, et al (2017a) Life cycle environmental assessment of industrial hazardous waste incineration and landfilling in China. *Int J Life Cycle Assess* 22:1054–1064 . doi: 10.1007/s11367-016-1228-0
- Hong J, Yu Z, Shi W, et al (2017b) Life cycle environmental and economic assessment of lead refining in China. *Int J Life Cycle Assess* 22:909–918 . doi: 10.1007/s11367-016-1209-3
- Järviö N, Henriksson PJG, Guinée JB (2018) Including GHG emissions from mangrove forests LULUC in LCA: a case study on shrimp farming in the Mekong Delta, Vietnam. *Int J Life Cycle Assess* 23:1078–1090 . doi: 10.1007/s11367-017-1332-9
- Jeong H, Minne E, Crittenden JC (2015) Life cycle assessment of the City of Atlanta, Georgia's centralized water system. *Int J Life Cycle Assess* 20:880–891 . doi: 10.1007/s11367-015-0874-y
- Jones H, Moura F, Domingos T (2017) Life cycle assessment of high-speed rail: a case study in Portugal. *Int J Life Cycle Assess* 22:410–422 . doi: 10.1007/s11367-016-1177-7
- Karaaslan E, Zhao Y, Tatari O (2018) Comparative life cycle assessment of sport utility vehicles with different fuel options. *Int J Life Cycle Assess* 23:333–347 . doi: 10.1007/s11367-017-1315-x
- Koffler C (2014) Life cycle assessment of automotive lightweighting through polymers under US boundary conditions. *Int J Life Cycle Assess* 19:538–545 . doi: 10.1007/s11367-013-0652-7
- Kyung D, Kim D, Yi S, et al (2017) Estimation of greenhouse gas emissions from sewer pipeline system. *Int J Life Cycle Assess* 22:1901–1911 . doi: 10.1007/s11367-017-1288-9
- Lelek L, Kulczycka J, Lewandowska A, Zarebska J (2016) Life cycle assessment of energy generation in Poland. *Int J Life Cycle Assess* 21:1–14 . doi: 10.1007/s11367-015-0979-3
- Lourguioui H, Brigolin D, Boulahdid M, Pastres R (2017) A perspective for reducing environmental impacts of mussel culture in Algeria. *Int J Life Cycle Assess* 22:1266–1277 . doi: 10.1007/s11367-017-1261-7
- Lozano-Medina A, Pérez-Báez SO, Alamo AL, Blanco-Marigorta AM (2018) A parametric environmental life cycle assessment of newspaper making in Spain. *Int J Life Cycle Assess* 23:1240–1260 . doi: 10.1007/s11367-017-1366-z
- Matsuura MISF, Dias FRT, Picoli JF, et al (2017) Life-cycle assessment of the soybean-sunflower production system in the Brazilian Cerrado. *Int J Life Cycle Assess* 22:492–501 . doi: 10.1007/s11367-016-1089-6
- Mendoza Beltran A, Chiantore M, Pecorino D, et al (2018) Accounting for inventory data and methodological choice uncertainty in a comparative life cycle assessment: the case of integrated multi-trophic aquaculture in an offshore Mediterranean enterprise. *Int J Life Cycle Assess* 23:1063–1077 . doi: 10.1007/s11367-017-1363-2
- Meyer R, Benetto E, Igos E, Lavandier C (2017) Analysis of the different techniques to include noise damage in life cycle assessment. A case study for car tires. *Int J Life Cycle Assess* 22:744–757 . doi: 10.1007/s11367-016-1188-4
- Minne E, Crittenden JC (2015) Impact of maintenance on life cycle impact and cost assessment for residential flooring options. *Int J Life Cycle Assess* 20:36–45 . doi: 10.1007/s11367-014-0809-z
- Mora MAM, Dominguez ER, Ibarra AA, et al (2014) A methodological improvement for assessing petrochemical projects through life cycle assessment and eco-costs. *Int J Life Cycle Assess* 19:517–531 . doi: 10.1007/s11367-013-0660-7
- Muñoz E, Vargas S, Navia R (2015) Environmental and economic analysis of residual woody biomass transport for energetic use in Chile. *Int J Life Cycle Assess* 20:1033–1043 . doi: 10.1007/s11367-015-0891-x
- Muñoz I, Flury K, Jungbluth N, et al (2014) Life cycle assessment of bio-based ethanol produced from different agricultural feedstocks. *Int J Life Cycle Assess* 19:109–119 . doi: 10.1007/s11367-013-0613-1
- Noshadravan A, Cheah L, Roth R, et al (2015) Stochastic comparative assessment of life-cycle greenhouse gas emissions from conventional and electric vehicles. *Int J Life Cycle Assess* 20:854–864 . doi: 10.1007/s11367-015-0866-y
- Pang B, Yang P, Wang Y, et al (2015) Life cycle environmental impact assessment of a bridge with different strengthening schemes. *Int J Life Cycle Assess* 20:1300–1311 . doi: 10.1007/s11367-015-0936-1
- Pizza A, Metz R, Hassanzadeh M, Bantignies JL (2014) Life cycle assessment of nanocomposites made of thermally conductive graphite nanoplatelets. *Int J Life Cycle Assess* 19:1226–1237 . doi: 10.1007/s11367-014-0733-2

- Prado-Lopez V, Seager TP, Chester M, et al (2014) Stochastic multi-attribute analysis (SMAA) as an interpretation method for comparative life-cycle assessment (LCA). *Int J Life Cycle Assess* 19:405–416 . doi: 10.1007/s11367-013-0641-x
- Ribal J, Ramírez-Sanz C, Estruch V, et al (2017) Organic versus conventional citrus. Impact assessment and variability analysis in the Comunitat Valenciana (Spain). *Int J Life Cycle Assess* 22:571–586 . doi: 10.1007/s11367-016-1048-2
- Romero-Gámez M, Antón A, Leyva R, Suárez-Rey EM (2017) Inclusion of uncertainty in the LCA comparison of different cherry tomato production scenarios. *Int J Life Cycle Assess* 22:798–811 . doi: 10.1007/s11367-016-1225-3
- Roy PO, Deschênes L, Margni M (2014) Uncertainty and spatial variability in characterization factors for aquatic acidification at the global scale. *Int J Life Cycle Assess* 19:882–890 . doi: 10.1007/s11367-013-0683-0
- Sampaio APC, de Sá M. de Sousa Filho M, Castro ALA, de Figueirêdo MCB (2017) Life cycle assessment from early development stages: the case of gelatin extracted from tilapia residues. *Int J Life Cycle Assess* 22:767–783 . doi: 10.1007/s11367-016-1179-5
- Scott RP, Cullen AC (2016) Reducing the life cycle environmental impacts of kesterite solar photovoltaics: comparing carbon and molybdenum back contact options. *Int J Life Cycle Assess* 21:29–43 . doi: 10.1007/s11367-015-0978-4
- Six L, De Wilde B, Vermeiren F, et al (2017) Using the product environmental footprint for supply chain management: lessons learned from a case study on pork. *Int J Life Cycle Assess* 22:1354–1372 . doi: 10.1007/s11367-016-1249-8
- Steinmann ZJN, Hauck M, Karuppiyah R, et al (2014) A methodology for separating uncertainty and variability in the life cycle greenhouse gas emissions of coal-fueled power generation in the USA. *Int J Life Cycle Assess* 19:1146–1155 . doi: 10.1007/s11367-014-0717-2
- Tabatabaie SMH, Murthy GS (2017) Effect of geographical location and stochastic weather variation on life cycle assessment of biodiesel production from camelina in the northwestern USA. *Int J Life Cycle Assess* 22:867–882 . doi: 10.1007/s11367-016-1191-9
- Timmermann V, Dibdiakova J (2014) Greenhouse gas emissions from forestry in East Norway. *Int J Life Cycle Assess* 19:1593–1606 . doi: 10.1007/s11367-014-0773-7
- Van Stappen F, Mathot M, Lories A, et al (2018) Sensitive parameters in local agricultural life cycle assessments: the illustrative case of cereal production in Wallonia, Belgium. *Int J Life Cycle Assess* 23:225–250 . doi: 10.1007/s11367-017-1325-8
- Whitehead B, Andrews D, Shah A (2015) The life cycle assessment of a UK data centre. *Int J Life Cycle Assess* 20:332–349 . doi: 10.1007/s11367-014-0838-7
- Wolf P, Groen EA, Berg W, et al (2017) Assessing greenhouse gas emissions of milk production: which parameters are essential? *Int J Life Cycle Assess* 22:441–455 . doi: 10.1007/s11367-016-1165-y
- Wong A, Zhang H, Kumar A (2016) Life cycle assessment of renewable diesel production from lignocellulosic biomass. *Int J Life Cycle Assess* 21:1404–1424 . doi: 10.1007/s11367-016-1107-8
- Zhang Y-R, Wu W-J, Wang Y-F (2016) Bridge life cycle assessment with data uncertainty. *Int J Life Cycle Assess* 21:569–576 . doi: 10.1007/s11367-016-1035-7

### **1.1.1b Probabilistic (other than Monte Carlo)**

- Astudillo MF, Thalwitz G, Vollrath F (2015) Modern analysis of an ancient integrated farming arrangement: life cycle assessment of a mulberry dyke and pond system. *Int J Life Cycle Assess* 20:1387–1398 . doi: 10.1007/s11367-015-0950-3
- Di Maria F, Micale C, Contini S (2016) A novel approach for uncertainty propagation applied to two different bio-waste management options. *Int J Life Cycle Assess* 21:1529–1537 . doi: 10.1007/s11367-016-1101-1
- Pfister S, Suh S (2015) Environmental impacts of thermal emissions to freshwater: spatially explicit fate and effect modeling for life cycle assessment and water footprinting. *Int J Life Cycle Assess* 20:927–936 . doi: 10.1007/s11367-015-0893-8

Woods L, Bakshi BR (2014) Reusable vs. disposable cups revisited: Guidance in life cycle comparisons addressing scenario, model, and parameter uncertainties for the US consumer. *Int J Life Cycle Assess* 19:931–940 . doi: 10.1007/s11367-013-0697-7

### **1.1.1c Taylor series**

Cordes H, Iriarte A, Villalobos P (2016) Evaluating the carbon footprint of Chilean organic blueberry production. *Int J Life Cycle Assess* 21:281–292 . doi: 10.1007/s11367-016-1034-8

Stylianou KS, Heller MC, Fulgoni VL, et al (2016) A life cycle assessment framework combining nutritional and environmental health impacts of diet: a case study on milk. *Int J Life Cycle Assess* 21:734–746 . doi: 10.1007/s11367-015-0961-0

### **1.1.1d Scenario analysis**

Cichorowski G, Joa B, Hottenroth H, Schmidt M (2015) Scenario analysis of life cycle greenhouse gas emissions of Darjeeling tea. *Int J Life Cycle Assess* 20:426–439 . doi: 10.1007/s11367-014-0840-0

Cleary J (2014) A life cycle assessment of residential waste management and prevention. *Int J Life Cycle Assess* 19:1607–1622 . doi: 10.1007/s11367-014-0767-5

Dzikuć M, Adamczyk J (2015) The ecological and economic aspects of a low emission limitation: a case study for Poland. *Int J Life Cycle Assess* 20:217–225 . doi: 10.1007/s11367-014-0819-x

Koponen K, Soimakallio S (2015) Foregone carbon sequestration due to land occupation – the case of agro-bioenergy in Finland. *Int J Life Cycle Assess* 20:1544–1556 . doi: 10.1007/s11367-015-0956-x

Krystofik M, Babbitt CW, Gaustad G (2014) When consumer behavior dictates life cycle performance beyond the use phase: Case study of inkjet cartridge end-of-life management. *Int J Life Cycle Assess* 19:1129–1145 . doi: 10.1007/s11367-014-0713-6

Larrea-Gallegos G, Vázquez-Rowe I, Gallice G (2017) Life cycle assessment of the construction of an unpaved road in an undisturbed tropical rainforest area in the vicinity of Manu National Park, Peru. *Int J Life Cycle Assess* 22:1109–1124 . doi: 10.1007/s11367-016-1221-7

Martins F, Machado S, Albergaria T, Delerue-Matos C (2017) LCA applied to nano scale zero valent iron synthesis. *Int J Life Cycle Assess* 22:707–714 . doi: 10.1007/s11367-016-1258-7

Prateep Na Talang R, Pizzol M, Sirivithayapakorn S (2017) Comparative life cycle assessment of fired brick production in Thailand. *Int J Life Cycle Assess* 22:1875–1891 . doi: 10.1007/s11367-016-1197-3

Reiter G, Lindorfer J (2015) Global warming potential of hydrogen and methane production from renewable electricity via power-to-gas technology. *Int J Life Cycle Assess* 20:477–489 . doi: 10.1007/s11367-015-0848-0

Renaud-Gentié C, Dijkman TJ, Bjørn A, Birkved M (2015) Pesticide emission modelling and freshwater ecotoxicity assessment for Grapevine LCA: adaptation of PestLCI 2.0 to viticulture. *Int J Life Cycle Assess* 20:1528–1543 . doi: 10.1007/s11367-015-0949-9

Warshay B, Brown JJ, Sgouridis S (2017) Erratum to: Life cycle assessment of integrated seawater agriculture in the Arabian (Persian) Gulf as a potential food and aviation biofuel resource (*Int J Life Cycle Assess*, 10.1007/s11367-016-1215-5). *Int J Life Cycle Assess* 22:1033 . doi: 10.1007/s11367-016-1240-4

### **1.1.1e Qualitative/pedigree**

Amienyo D, Azapagic A (2016) Life cycle environmental impacts and costs of beer production and consumption in the UK. *Int J Life Cycle Assess* 21:492–509 . doi: 10.1007/s11367-016-1028-6

### **1.1.1f Sensitivity analysis**

Ahmadi L, Young SB, Fowler M, et al (2017) A cascaded life cycle: reuse of electric vehicle lithium-ion battery packs in energy storage systems. *Int J Life Cycle Assess* 22:111–124 . doi: 10.1007/s11367-015-0959-7

Auer J, Meincke A (2018) Comparative life cycle assessment of electric motors with different efficiency classes: a deep dive into the trade-offs between the life cycle stages in ecodesign context. *Int J Life Cycle Assess* 23:1590–1608 . doi: 10.1007/s11367-017-1378-8

- Avadí A, Bolaños C, Sandoval I, Ycaza C (2015) Life cycle assessment of Ecuadorian processed tuna. *Int J Life Cycle Assess* 20:1415–1428 . doi: 10.1007/s11367-015-0943-2
- Bhochhibhoya S, Pizzol M, Achten WMJ, et al (2017) Comparative life cycle assessment and life cycle costing of lodging in the Himalaya. *Int J Life Cycle Assess* 22:1851–1863 . doi: 10.1007/s11367-016-1212-8
- Choi W, Song HH (2014) Well-to-wheel analysis on greenhouse gas emission and energy use in Korea. *Int J Life Cycle Assess* 19:850–860 . doi: 10.1007/s11367-015-0911-x
- Dias AC, Boschmonart-Rives J, González-García S, et al (2014) Analysis of raw cork production in Portugal and Catalonia using life cycle assessment. *Int J Life Cycle Assess* 19:1985–2000 . doi: 10.1007/s11367-014-0801-7
- Du G, Safi M, Pettersson L, Karoumi R (2014) Life cycle assessment as a decision support tool for bridge procurement: environmental impact comparison among five bridge designs. *Int J Life Cycle Assess* 19:1948–1964 . doi: 10.1007/s11367-014-0797-z
- Emanuelsson A, Ziegler F, Pihl L, et al (2014) Accounting for overfishing in life cycle assessment: New impact categories for biotic resource use. *Int J Life Cycle Assess* 19:1156–1168 . doi: 10.1007/s11367-013-0684-z
- Goellner KN, Sparrow E (2014) An environmental impact comparison of single-use and reusable thermally controlled shipping containers. *Int J Life Cycle Assess* 19:611–619 . doi: 10.1007/s11367-013-0668-z
- Hashim Z, Subramaniam V, Harun MH, Kamarudin N (2018) Carbon footprint of oil palm planted on peat in Malaysia. *Int J Life Cycle Assess* 23:1201–1217 . doi: 10.1007/s11367-017-1367-y
- Hossain MU, Poon CS, Lo IMC, Cheng JCP (2016) Evaluation of environmental friendliness of concrete paving eco-blocks using LCA approach. *Int J Life Cycle Assess* 21:70–84 . doi: 10.1007/s11367-015-0988-2
- Ibbotson S, Kara S (2014) LCA case study. Part 2: Environmental footprint and carbon tax of cradle-to-gate for composite and stainless steel I-beams. *Int J Life Cycle Assess* 19:272–284 . doi: 10.1007/s11367-013-0639-4
- Jang JJ, Song HH (2015) Well-to-wheel analysis on greenhouse gas emission and energy use with petroleum-based fuels in Korea: gasoline and diesel. *Int J Life Cycle Assess* 20:1102–1116 . doi: 10.1007/s11367-015-0911-x
- Kobayashi Y, Peters GM, Ashbolt NJ, Khan SJ (2017) Aggregating local, regional and global burden of disease impact assessment: detecting potential problem shifting in air quality policy making. *Int J Life Cycle Assess* 22:1543–1557 . doi: 10.1007/s11367-017-1276-0
- Lee S, Yoo DG, Jung D, Kim JH (2018) Application of life cycle energy analysis for designing a water distribution network. *Int J Life Cycle Assess* 23:1174–1191 . doi: 10.1007/s11367-017-1346-3
- Lyng KA, Modahl IS, Møller H, et al (2015) The BioValueChain model: a Norwegian model for calculating environmental impacts of biogas value chains. *Int J Life Cycle Assess* 20:490–502 . doi: 10.1007/s11367-015-0851-5
- Mueller C, De Baan L, Koellner T (2014) Comparing direct land use impacts on biodiversity of conventional and organic milk - Based on a Swedish case study. *Int J Life Cycle Assess* 19:52–68 . doi: 10.1007/s11367-013-0638-5
- Nordborg M, Sasu-Boakye Y, Cederberg C, Berndes G (2017) Challenges in developing regionalized characterization factors in land use impact assessment: impacts on ecosystem services in case studies of animal protein production in Sweden. *Int J Life Cycle Assess* 22:328–345 . doi: 10.1007/s11367-016-1158-x
- Quinteiro P, Van de Broek M, Dias AC, et al (2017) Life cycle impacts of topsoil erosion on aquatic biota: case study on Eucalyptus globulus forest. *Int J Life Cycle Assess* 22:159–171 . doi: 10.1007/s11367-016-1146-1
- Richa K, Babbitt CW, Nenadic NG, Gaustad G (2017) Environmental trade-offs across cascading lithium-ion battery life cycles. *Int J Life Cycle Assess* 22:66–81 . doi: 10.1007/s11367-015-0942-3
- Schueler M, Paulsen HM, Berg W, Prochnow A (2018) Accounting for inter-annual variability of farm activity data for calculation of greenhouse gas emissions in dairy farming. *Int J Life Cycle Assess* 23:41–54 . doi: 10.1007/s11367-017-1307-x

- Sousa VMZ, Luz SM, Caldeira-Pires A, et al (2017) Life cycle assessment of biodiesel production from beef tallow in Brazil. *Int J Life Cycle Assess* 22:1837–1850 . doi: 10.1007/s11367-017-1396-6
- Uihlein A (2016) Life cycle assessment of ocean energy technologies. *Int J Life Cycle Assess* 21:1425–1437 . doi: 10.1007/s11367-016-1120-y
- Zea Escamilla E, Habert G (2017) Method and application of characterisation of life cycle impact data of construction materials using geographic information systems. *Int J Life Cycle Assess* 22:1210–1219 . doi: 10.1007/s11367-016-1238-y
- Zhang Y, Liu X, Xiao R, Yuan Z (2015) Life cycle assessment of cotton T-shirts in China. *Int J Life Cycle Assess* 20:994–1004 . doi: 10.1007/s11367-015-0889-4

### **1.1.1g Fuzzy logic**

None.

### **1.1.1h Bayesian**

None.

### **1.1.1i Regression**

None.

### **1.1.1j Not indicated/other**

- Carlisle S, Friedlander E (2016) The influence of durability and recycling on life cycle impacts of window frame assemblies. *Int J Life Cycle Assess* 21:1645–1657 . doi: 10.1007/s11367-016-1093-x
- Cruze NB, Goel PK, Bakshi BR (2014) Revisiting least squares techniques for the purposes of allocation in life cycle inventory. *Int J Life Cycle Assess* 19:1733–1744 . doi: 10.1007/s11367-014-0771-9
- Dong Y, Rosenbaum RK, Hauschild MZ (2018) Metal toxicity characterization factors for marine ecosystems—considering the importance of the estuary for freshwater emissions. *Int J Life Cycle Assess* 23:1641–1653 . doi: 10.1007/s11367-017-1376-x
- Kaenchan P, Gheewala SH (2017) Budget constraint and the valuation of environmental impacts in Thailand. *Int J Life Cycle Assess* 22:1678–1691 . doi: 10.1007/s11367-016-1210-x
- Kucukvar M, Noori M, Egilmez G, Tatari O (2014) Stochastic decision modeling for sustainable pavement designs. *Int J Life Cycle Assess* 19:1185–1199 . doi: 10.1007/s11367-014-0723-4
- Morera S, Remy C, Comas J, Corominas L (2016) Life cycle assessment of construction and renovation of sewer systems using a detailed inventory tool. *Int J Life Cycle Assess* 21:1121–1133 . doi: 10.1007/s11367-016-1078-9
- Nakano K, Ando K, Takigawa M, Hattori N (2018) Life cycle assessment of wood-based boards produced in Japan and impact of formaldehyde emissions during the use stage. *Int J Life Cycle Assess* 23:957–969 . doi: 10.1007/s11367-017-1343-6
- Napolano L, Menna C, Asprone D, et al (2015) Life cycle environmental impact of different replacement options for a typical old flat roof. *Int J Life Cycle Assess* 20:694–708 . doi: 10.1007/s11367-015-0852-4
- Walker C, Beretta C, Sanjuán N, Hellweg S (2018) Calculating the energy and water use in food processing and assessing the resulting impacts. *Int J Life Cycle Assess* 23:824–839 . doi: 10.1007/s11367-017-1327-6

### **1.1.2 Uncertainty analysis reported as not performed**

- Bieda B, Skalna I, Gawel B, Grzesik K, Hanclik A, Sala D (2018) Life cycle inventory processes of the integrated steel plant (ISP) in Krakow, Poland-continuous casting of steel (CCS): a case study. *Int J Life Cycle Assess* 23:1274–1285. doi: 10.1007/s11367-017-1365-0
- Blanck G, Cuisinier O, Masrouri F (2016) Life cycle assessment of non-traditional treatments for the valorisation of dry soils in earthworks. *Int J Life Cycle Assess* 21:1035–1048. doi: 10.1007/s11367-016-1076-y
- Boulay AM, Bayart JB, Bulle C, Franceschini H, Motoshita M, Muñoz I, Pfister S, Margni M (2015) Analysis of water use impact assessment methods (part B): applicability for water footprinting and decision making with a laundry case study. *Int J Life Cycle Assess* 20:865–879. doi: 10.1007/s11367-015-0868-9

- Buxmann K, Koehler A, Thylmann D (2016) Water scarcity footprint of primary aluminium. *Int J Life Cycle Assess* 21:1605–1615. doi: 10.1007/s11367-015-0997-1
- Dolci G, Tua C, Grosso M, Rigamonti L (2016) Life cycle assessment of consumption choices: a comparison between disposable and rechargeable household batteries. *Int J Life Cycle Assess* 21:1691–1705. doi: 10.1007/s11367-016-1134-5
- Dong YH, Ng ST (2015) A social life cycle assessment model for building construction in Hong Kong. *Int J Life Cycle Assess* 20:1166–1180. doi: 10.1007/s11367-015-0908-5
- Hong J, Zhou J, Hong J (2015) Environmental and economic impact of furfuralcohol production using corncob as a raw material. *Int J Life Cycle Assess* 20:623–631. doi: 10.1007/s11367-015-0854-2
- Li T, Zhang H, Liu Z, Ke Qingdi, Alting L (2014) A system boundary identification method for life cycle assessment. *Int J Life Cycle Assess* 19:646–660. doi: 10.1007/s11367-013-0654-5
- Mirabella N, Castellani V, Sala S (2014) Forestry operations in the alpine context. Life cycle assessment to support the integrated assessment of forest wood short supply chain. *Int J Life Cycle Assess* 19:1524–1535. doi: 10.1007/s11367-014-0756-8
- Muñoz I, Otte N, Van Hoof G, Rigarlsford G (2017) A model and tool to calculate life cycle inventories of chemicals discharged down the drain. *Int J Life Cycle Assess* 22:986–1004. doi: 10.1007/s11367-016-1189-3
- Newton RW, Little DC (2018) Mapping the impacts of farmed Scottish salmon from a life cycle perspective. *Int J Life Cycle Assess* 23:1018–1029. doi: 10.1007/s11367-017-1386-8
- Parker R (2018) Implications of high animal by-product feed inputs in life cycle assessments of farmed Atlantic salmon. *Int J Life Cycle Assess* 23:982–994. doi: 10.1007/s11367-017-1340-9
- Pehlken A, Albach S, Vogt T (2017) Is there a resource constraint related to lithium ion batteries in cars? *Int J Life Cycle Assess* 22:40–53. doi: 10.1007/s11367-015-0925-4
- Sala S, Benini L, Mancini L, Pant R (2015) Integrated assessment of environmental impact of Europe in 2010: data sources and extrapolation strategies for calculating normalisation factors. *Int J Life Cycle Assess* 20:1568–1585. doi: 10.1007/s11367-015-0958-8
- Tait MW, Cheung WM (2016) A comparative cradle-to-gate life cycle assessment of three concrete mix designs. *Int J Life Cycle Assess* 21:847–860. doi: 10.1007/s11367-016-1045-5
- Wiloso EI, Bessou C, Heijungs R (2015) Methodological issues in comparative life cycle assessment: treatment options for empty fruit bunches in a palm oil system. *Int J Life Cycle Assess* 20:204–216. doi: 10.1007/s11367-014-0815-1

### 1.1.3 Uncertainty mentioned but no analysis performed

- Abdou K, Ben Rais Lasram F, Romdhane MS, Le Loc'h F, Aubin J (2018) Rearing performances and environmental assessment of sea cage farming in Tunisia using life cycle assessment (LCA) combined with PCA and HCPC. *Int J Life Cycle Assess* 23:1049–1062. doi: 10.1007/s11367-017-1339-2
- Aleisa E, Al-Jarallah R (2018) A triple bottom line evaluation of solid waste management strategies: a case study for an arid Gulf State, Kuwait. *Int J Life Cycle Assess* 23:1460–1475. doi: 10.1007/s11367-017-1410-z
- Allacker K, de Souza DM, Sala S (2014) Land use impact assessment in the construction sector: an analysis of LCIA models and case study application. *Int J Life Cycle Assess* 19:1799–1809. doi: 10.1007/s11367-014-0781-7
- Almeida C, Vaz S, Cabral H, Ziegler F (2014) Environmental assessment of sardine (*Sardina pilchardus*) purse seine fishery in Portugal with LCA methodology including biological impact categories. *Int J Life Cycle Assess* 19:297–306. doi: 10.1007/s11367-013-0646-5
- Alvarenga RAF, Erb K-H, Haberl H, Soares SR, van Zelm R, Dewulf J (2015) Global land use impacts on biomass production—a spatial-differentiated resource-related life cycle impact assessment method. *Int J Life Cycle Assess* 20:440–450. doi: 10.1007/s11367-014-0843-x
- Amarakoon S, Vallet C, Curran MA, Haldar P, Metacarpa D, Fobare D, Bell J (2018) Life cycle assessment of photovoltaic manufacturing consortium (PVMC) copper indium gallium (di)selenide (CIGS) modules. *Int J Life Cycle Assess* 23:851–866. doi: 10.1007/s11367-017-1345-4



- Angrill S, Segura-Castillo L, Petit-Boix A, Rieradevall J, Gabarrell X, Josa A (2017) Environmental performance of rainwater harvesting strategies in Mediterranean buildings. *Int J Life Cycle Assess* 22:398–409. doi: 10.1007/s11367-016-1174-x
- Arvesen A, Nes RN, Huertas-Hernando D, Hertwich EG (2014) Life cycle assessment of an offshore grid interconnecting wind farms and customers across the North Sea. *Int J Life Cycle Assess* 19:826–837. doi: 10.1007/s11367-014-0709-2
- Arvidsson R, Hildenbrand J, Baumann H, Islam KMN, Parsmo R (2018) A method for human health impact assessment in social LCA: lessons from three case studies. *Int J Life Cycle Assess* 23:690–699. doi: 10.1007/s11367-016-1116-7
- Asdrubali F, Baldinelli G, Scrucca F (2015) Comparative life cycle assessment of an innovative CSP air-cooled system and conventional condensers. *Int J Life Cycle Assess* 20:1076–1088. doi: 10.1007/s11367-015-0901-z
- Atmaca A (2016) Life-cycle assessment and cost analysis of residential buildings in South East of Turkey: part 2—a case study. *Int J Life Cycle Assess* 21:925–942. doi: 10.1007/s11367-016-1051-7
- Avadí A, Fréon P, Quispe I (2014) Environmental assessment of Peruvian anchoveta food products: Is less refined better? *Int J Life Cycle Assess* 19:1276–1293. doi: 10.1007/s11367-014-0737-y
- Avadí A, Nitschelm L, Corson M, Vertès F (2016) Data strategy for environmental assessment of agricultural regions via LCA: case study of a French catchment. *Int J Life Cycle Assess* 21:476–491. doi: 10.1007/s11367-016-1036-6
- Barjoveanu G, Comandaru IM, Rodriguez-Garcia G, Hospido A, Teodosiu C (2014) Evaluation of water services system through LCA. A case study for Iasi City, Romania. *Int J Life Cycle Assess* 19:449–462. doi: 10.1007/s11367-013-0635-8
- Bayart JB, Worbe S, Grimaud J, Aoustin E (2014) The Water Impact Index: A simplified single-indicator approach for water footprinting. *Int J Life Cycle Assess* 19:1336–1344. doi: 10.1007/s11367-014-0732-3
- Beshr M, Aute V, Abdelaziz O, Fricke B, Radermacher R (2017) Potential emission savings from refrigeration and air conditioning systems by using low GWP refrigerants. *Int J Life Cycle Assess* 22:675–682. doi: 10.1007/s11367-016-1186-6
- Bessou C, Basset-Mens C, Latunussa C, Vélú A, Heitz H, Vannièrè H, Caliman J-P (2016) Partial modelling of the perennial crop cycle misleads LCA results in two contrasted case studies. *Int J Life Cycle Assess* 21:297–310. doi: 10.1007/s11367-016-1030-z
- Bocoum I, Macombe C, Revéret JP (2015) Anticipating impacts on health based on changes in income inequality caused by life cycles. *Int J Life Cycle Assess* 20:405–417. doi: 10.1007/s11367-014-0835-x
- Bories C, Guzman Barrera NI, Peydecastaing J, Etxeberria I, Vedrenne E, Garcia CV, Thiebaut-Roux S, Sablayrolles C (2018) LCA case study: comparison between independent and coproduction pathways for the production of ethyl and n-butyl acetates. *Int J Life Cycle Assess* 23:251–266. doi: 10.1007/s11367-017-1317-8
- Bunchai A, Suttinun O, H-Kittikun A, Musikavong C (2017) Life cycle greenhouse gas emissions of palm oil production by wet and dry extraction processes in Thailand. *Int J Life Cycle Assess* 22:1802–1814. doi: 10.1007/s11367-016-1232-4
- Burchart-Korol D, Korol J, Czaplicka-Kolarz K (2016) Life cycle assessment of heat production from underground coal gasification. *Int J Life Cycle Assess* 21:1391–1403. doi: 10.1007/s11367-016-1102-0
- Calderón LA, Herrero M, Laca A, Díaz M (2018) Environmental impact of a traditional cooked dish at four different manufacturing scales: from ready meal industry and catering company to traditional restaurant and homemade. *Int J Life Cycle Assess* 23:811–823. doi: 10.1007/s11367-017-1326-7
- Capitano C, Peri G, Rizzo G (2014) Is the Eco-label EU Decision for hard coverings really capable of capturing the environmental performances of the marble productive chain? A field verification by means of a life cycle approach. *Int J Life Cycle Assess* 19:1022–1035. doi: 10.1007/s11367-014-0718-1
- Castanheira ÉG, Freire F (2017) Environmental life cycle assessment of biodiesel produced with palm oil from Colombia. *Int J Life Cycle Assess* 22:587–600. doi: 10.1007/s11367-016-1097-6

- Cerutti AK, Ardente F, Contu S, Donno D, Beccaro GL (2018) Modelling, assessing, and ranking public procurement options for a climate-friendly catering service. *Int J Life Cycle Assess* 23:95–115. doi: 10.1007/s11367-017-1306-y
- Chatzisyneon E, Foteinis S, Borthwick AGL (2017) Life cycle assessment of the environmental performance of conventional and organic methods of open field pepper cultivation system. *Int J Life Cycle Assess* 22:896–908. doi: 10.1007/s11367-016-1204-8
- Chobtang J, Ledgard SF, McLaren SJ, Zonderland-Thomassen M, Donaghy DJ (2016) Appraisal of environmental profiles of pasture-based milk production: a case study of dairy farms in the Waikato region, New Zealand. *Int J Life Cycle Assess* 21:311–325. doi: 10.1007/s11367-016-1033-9
- Chun YY, Lee KM (2017) Environmental impacts of the rental business model compared to the conventional business model: a Korean case of water purifier for home use. *Int J Life Cycle Assess* 22:1096–1108. doi: 10.1007/s11367-016-1227-1
- De Figueirêdo MCB, De Boer IJM, Kroeze C, Barros VdS, de Sousa JA, de Aragão FAS, Gondim RS, Potting J (2014) Reducing the impact of irrigated crops on freshwater availability: The case of Brazilian yellow melons. *Int J Life Cycle Assess* 19:437–448. doi: 10.1007/s11367-013-0630-0
- Delogu M, Del Pero F, Romoli F, Pierini M (2015) Life cycle assessment of a plastic air intake manifold. *Int J Life Cycle Assess* 20:1429–1443. doi: 10.1007/s11367-015-0946-z
- Demertzi M, Paulo JA, Faias SP, Arroja L, Dias AC (2018) Evaluating the carbon footprint of the cork sector with a dynamic approach including biogenic carbon flows. *Int J Life Cycle Assess* 1448–1459. doi: 10.1007/s11367-017-1406-8
- Dettmer T, Ibbotson S, Öhlschläger G, Herrmann C, Kara S (2015) Technical applications of *Jatropha* oil—environmental effectiveness of renewable resources. *Int J Life Cycle Assess* 20:1376–1386. doi: 10.1007/s11367-015-0953-0
- do Carmo BBT, Margni M, Baptiste P (2017) Addressing uncertain scoring and weighting factors in social life cycle assessment. *Int J Life Cycle Assess* 22:1609–1617. doi: 10.1007/s11367-017-1275-1
- Du C, Kulay L, Cavalett O, Dias L, Freire F (2018) Life cycle assessment addressing health effects of particulate matter of mechanical versus manual sugarcane harvesting in Brazil. *Int J Life Cycle Assess* 23:787–799. doi: 10.1007/s11367-017-1334-7
- Elshout PMF, Van Zelm R, Karuppiah R, Laurenzi IJ, Huijbregts MAJ (2014) A spatially explicit data-driven approach to assess the effect of agricultural land occupation on species groups. *Int J Life Cycle Assess* 19:758–769. doi: 10.1007/s11367-014-0701-x
- Fan L, Pang B, Zhang Y, Zhang X, Sun Y, Wang Y (2018) Evaluation for social and humanity demand on green residential districts in China based on SLCA. *Int J Life Cycle Assess* 23:640–650. doi: 10.1007/s11367-016-1166-x
- Farmery AK, Jennings S, Gardner C, Watson RA, Green BS (2017) Naturalness as a basis for incorporating marine biodiversity into life cycle assessment of seafood. *Int J Life Cycle Assess* 22:1571–1587. doi: 10.1007/s11367-017-1274-2
- Fries N, Hellweg S (2014) LCA of land-based freight transportation: facilitating practical application and including accidents in LCIA. *Int J Life Cycle Assess* 19:546–557. doi: 10.1007/s11367-013-0657-2
- Frischknecht R, Wyss F, Büsler Knöpfel S, Lützkendorg T, Balouktsi M (2015) Cumulative energy demand in LCA: the energy harvested approach. *Int J Life Cycle Assess* 20:957–969. doi: 10.1007/s11367-015-0897-4
- Gilpin GS, Andrae ASG (2017) Comparative attributional life cycle assessment of European cellulase enzyme production for use in second-generation lignocellulosic bioethanol production. *Int J Life Cycle Assess* 22:1034–1053. doi: 10.1007/s11367-016-1208-4
- Girardi P, Gargiulo A, Brambilla PC (2015) A comparative LCA of an electric vehicle and an internal combustion engine vehicle using the appropriate power mix: the Italian case study. *Int J Life Cycle Assess* 20:1127–1142. doi: 10.1007/s11367-015-0903-x
- Gloria TP, Kohlsaar C, Bautil P, Wolf B, Early D, Ben-Zekry B (2014) A statistical approach to interpret relative environmental performance within product categories. *Int J Life Cycle Assess* 19:491–499. doi: 10.1007/s11367-013-0661-6

- González-García S, Villanueva-Rey P, Belo S, Vázquez-Rowe I, Moreira MT, Feijoo G, Arroja L (2015) Cross-vessel eco-efficiency analysis. A case study for purse seining fishing from North Portugal targeting European pilchard. *Int J Life Cycle Assess* 20:1019–1032. doi: 10.1007/s11367-015-0887-6
- Hansen SB, Olsen SI, Ujang Z (2014) Carbon balance impacts of land use changes related to the life cycle of Malaysian palm oil-derived biodiesel. *Int J Life Cycle Assess* 19:558–566. doi: 10.1007/s11367-013-0672-3
- Harder R, Peters GM, Molander S, Ashbolt NJ, Svanström M (2016) Including pathogen risk in life cycle assessment: the effect of modelling choices in the context of sewage sludge management. *Int J Life Cycle Assess* 21:60–69. doi: 10.1007/s11367-015-0996-2
- Harder R, Peters GM, Svanström M, Khan SJ, Molander S (2017) Estimating human toxicity potential of land application of sewage sludge: the effect of modelling choices. *Int J Life Cycle Assess* 22:731–743. doi: 10.1007/s11367-016-1182-x
- Hassanain EM, Yacout DMM, Metwally MA, Hassouna MS (2017) Life cycle assessment of waste strategies for used lubricating oil. *Int J Life Cycle Assess* 22:1232–1240. doi: 10.1007/s11367-016-1255-x
- Heidari MD, Mobli H, Omid M, Rafiee S, Marbini VJ, Elshout PMF, Van Zelm R, Juijbregts MAJ (2017) Spatial and technological variability in the carbon footprint of durum wheat production in Iran. *Int J Life Cycle Assess* 22:1893–1900. doi: 10.1007/s11367-017-1283-1
- Helin T, Holma A, Soimakallio S (2014) Is land use impact assessment in LCA applicable for forest biomass value chains? Findings from comparison of use of Scandinavian wood, agro-biomass and peat for energy. *Int J Life Cycle Assess* 19:770–785. doi: 10.1007/s11367-014-0706-5
- Helmers E, Dietz J, Hartard S (2017) Electric car life cycle assessment based on real-world mileage and the electric conversion scenario. *Int J Life Cycle Assess* 22:15–30. doi: 10.1007/s11367-015-0934-3
- Hicks AL, Theis TL (2017) A comparative life cycle assessment of commercially available household silver-enabled polyester textiles. *Int J Life Cycle Assess* 22:256–265. doi: 10.1007/s11367-016-1145-2
- Hischier R (2015) Life cycle assessment study of a field emission display television device. *Int J Life Cycle Assess* 20:61–73. doi: 10.1007/s11367-014-0806-2
- Hollberg A, Ruth J (2016) LCA in architectural design—a parametric approach. *Int J Life Cycle Assess* 21:943–960. doi: 10.1007/s11367-016-1065-1
- Hosseiniyou SA, Mansour S, Shirazi MA (2014) Social life cycle assessment for material selection: A case study of building materials. *Int J Life Cycle Assess* 19:620–645. doi: 10.1007/s11367-013-0658-1
- Huang L, Bohne RA, Bruland A, Jakobsen PD, Lohne J (2015) Life cycle assessment of Norwegian road tunnel. *Int J Life Cycle Assess* 20:174–184. doi: 10.1007/s11367-014-0823-1
- Hussain M, Malik RN, Taylor A (2018) Environmental profile analysis of particleboard production: a study in a Pakistani technological condition. *Int J Life Cycle Assess* 23:1542–1561. doi: 10.1007/s11367-017-1385-9
- Iribarren D, Martín-Gamboa M, O’Mahony T, Dufour J (2016) Screening of socio-economic indicators for sustainability assessment: a combined life cycle assessment and data envelopment analysis approach. *Int J Life Cycle Assess* 21:202–214. doi: 10.1007/s11367-015-1002-8
- Jonkers N, Krop H, van Ewijk H, Leonards PEG (2016) Life cycle assessment of flame retardants in an electronics application. *Int J Life Cycle Assess* 21:146–161. doi: 10.1007/s11367-015-0999-z
- Karlsdóttir MR, Pálsson ÓP, Pálsson H, Maya-Drysdale L (2015) Life cycle inventory of a flash geothermal combined heat and power plant located in Iceland. *Int J Life Cycle Assess* 20:503–519. doi: 10.1007/s11367-014-0842-y
- Kasah T (2014) LCA of a newsprint paper machine: A case study of capital equipment. *Int J Life Cycle Assess* 19:417–428. doi: 10.1007/s11367-013-0640-y
- Keijzer E (2017) The environmental impact of activities after life: life cycle assessment of funerals. *Int J Life Cycle Assess* 22:715–730. doi: 10.1007/s11367-016-1183-9
- Kikuchi Y, Hirao M, Ookubo T, Sasaki A (2014) Design of recycling system for poly(methyl methacrylate) (PMMA). Part 1: Recycling scenario analysis. *Int J Life Cycle Assess* 19:120–129. doi: 10.1007/s11367-013-0624-y

- Kono J, Ostermeyer Y, Wallbaum H (2017) The trends of hourly carbon emission factors in Germany and investigation on relevant consumption patterns for its application. *Int J Life Cycle Assess* 22:1493–1501. doi: 10.1007/s11367-017-1277-z
- Koroneos C, Stylos N (2014) Exergetic life cycle assessment of a grid-connected, polycrystalline silicon photovoltaic system. *Int J Life Cycle Assess* 19:1716–1732. doi: 10.1007/s11367-014-0752-z
- Laso J, Vázquez-Rowe I, Margallo M, Crujeiras RM, Irabien Á, Aldaco R (2018) Life cycle assessment of European anchovy (*Engraulis encrasicolus*) landed by purse seine vessels in northern Spain. *Int J Life Cycle Assess* 23:1107–1125. doi: 10.1007/s11367-017-1318-7
- Lebailly F, Lévassieur A, Samson R, Deschênes L (2014) Development of a dynamic LCA approach for the freshwater ecotoxicity impact of metals and application to a case study regarding zinc fertilization. *Int J Life Cycle Assess* 19:1745–1754. doi: 10.1007/s11367-014-0779-1
- Li D, Huijbregts MAJ, Jolliet O (2015) Life cycle health impacts of polycyclic aromatic hydrocarbon for source-specific mixtures. *Int J Life Cycle Assess* 20:87–99. doi: 10.1007/s11367-014-0810-6
- Lieberei J, Gheewala SH (2017) Resource depletion assessment of renewable electricity generation technologies—comparison of life cycle impact assessment methods with focus on mineral resources. *Int J Life Cycle Assess* 22:185–198. doi: 10.1007/s11367-016-1152-3
- Lillesund VF, Hagen D, Michelsen O, Foldvik A, Barton DN (2017) Comparing land use impacts using ecosystem quality, biogenic carbon emissions, and restoration costs in a case study of hydropower plants in Norway. *Int J Life Cycle Assess* 22:1384–1396. doi: 10.1007/s11367-017-1263-5
- Liptow C, Tillman AM, Janssen M (2015) Life cycle assessment of biomass-based ethylene production in Sweden — is gasification or fermentation the environmentally preferable route? *Int J Life Cycle Assess* 20:632–644. doi: 10.1007/s11367-015-0855-1
- Lombardi L, Tribioli L, Cozzolino R, Bella G (2017) Comparative environmental assessment of conventional, electric, hybrid, and fuel cell powertrains based on LCA. *Int J Life Cycle Assess* 22:1989–2006. doi: 10.1007/s11367-017-1294-y
- Lüscher G, Nemecek T, Arndorfer M, Balázs K, Dennis P, Fjellstad W, Friedal JK, Gaillard G, Herzog F, Sarthou J-P, Stoyanova S, Wolfrum S, Jeanneret P (2017) Biodiversity assessment in LCA: a validation at field and farm scale in eight European regions. *Int J Life Cycle Assess* 22:1483–1492. doi: 10.1007/s11367-017-1278-y
- Mahalle L, Alemdar A, Mihai M, Legros N (2014) A cradle-to-gate life cycle assessment of wood fibre-reinforced polylactic acid (PLA) and polylactic acid/thermoplastic starch (PLA/TPS) biocomposites. *Int J Life Cycle Assess* 19:1305–1315. doi: 10.1007/s11367-014-0731-4
- Mandade P, Bakshi BR, Yadav GD (2015) Ethanol from Indian agro-industrial lignocellulosic biomass—a life cycle evaluation of energy, greenhouse gases, land and water. *Int J Life Cycle Assess* 20:1649–1658. doi: 10.1007/s11367-015-0966-8
- Mangmeechai A, Jaramillo P, Griffin WM, Matthews HS (2014) Life cycle consumptive water use for oil shale development and implications for water supply in the Colorado River Basin. *Int J Life Cycle Assess* 19:677–687. doi: 10.1007/s11367-013-0651-8
- McPherson EG, Kendall A (2014) A life cycle carbon dioxide inventory of the Million Trees Los Angeles program. *Int J Life Cycle Assess* 19:1653–1665. doi: 10.1007/s11367-014-0772-8
- Medeiros DL, Tavares AO do C, Rapôso ÁLQR e S, Kiperstok A (2017) Life cycle assessment in the furniture industry: the case study of an office cabinet. *Int J Life Cycle Assess* 22:1823–1836. doi: 10.1007/s11367-017-1370-3
- Mengarelli M, Neugebauer S, Finkbeiner M, Germain M, Buttol P, Reale F (2017) End-of-life modelling in life cycle assessment—material or product-centred perspective? *Int J Life Cycle Assess* 22:1288–1301. doi: 10.1007/s11367-016-1237-z
- Michelsen O, McDevitt JE, Coelho CRV (2014) A comparison of three methods to assess land use impacts on biodiversity in a case study of forestry plantations in New Zealand. *Int J Life Cycle Assess* 19:1214–1225. doi: 10.1007/s11367-014-0742-1
- Miotti M, Hofer J, Bauer C (2017) Integrated environmental and economic assessment of current and future fuel cell vehicles. *Int J Life Cycle Assess* 22:94–110. doi: 10.1007/s11367-015-0986-4

- Mirabella N, Castellani V, Sala S (2014) LCA for assessing environmental benefit of eco-design strategies and forest wood short supply chain: a furniture case study. *Int J Life Cycle Assess* 19:1536–1550. doi: 10.1007/s11367-014-0757-7
- Moberg Å, Borggren C, Ambell C, Finnveden G, Guldbrandsson F, Bondesson A, Malmödin J, Bergmark P (2014) Simplifying a life cycle assessment of a mobile phone. *Int J Life Cycle Assess* 19:979–993. doi: 10.1007/s11367-014-0721-6
- Morales M, Quintero J, Aroca G (2017) Environmental assessment of the production and addition of bioethanol produced from *Eucalyptus globulus* to gasoline in Chile. *Int J Life Cycle Assess* 22:525–536. doi: 10.1007/s11367-016-1119-4
- Myllyviita T, Leskinen P, Seppälä J (2014) Impact of normalisation, elicitation technique and background information on panel weighting results in life cycle assessment. *Int J Life Cycle Assess* 19:377–386. doi: 10.1007/s11367-013-0645-6
- Niero M, Di Felice F, Ren J, Manzardo A, Scipioni A (2014) How can a life cycle inventory parametric model streamline life cycle assessment in the wooden pallet sector? *Int J Life Cycle Assess* 19:901–918. doi: 10.1007/s11367-014-0705-6
- Nishihara Hun AL, Mele FD, Pérez GA (2017) A comparative life cycle assessment of the sugarcane value chain in the province of Tucumán (Argentina) considering different technology levels. *Int J Life Cycle Assess* 22:502–515. doi: 10.1007/s11367-016-1047-3
- Nunez P, Jones S (2016) Cradle to gate: life cycle impact of primary aluminium production. *Int J Life Cycle Assess* 21:1594–1604. doi: 10.1007/s11367-015-1003-7
- Onat NC, Kucukvar M, Tatari O (2014) Integrating triple bottom line input-output analysis into life cycle sustainability assessment framework: The case for US buildings. *Int J Life Cycle Assess* 19:1488–1505. doi: 10.1007/s11367-014-0753-y
- Onat NC, Kucukvar M, Tatari O, Egilmez G (2016) Integration of system dynamics approach toward deepening and broadening the life cycle sustainability assessment framework: a case for electric vehicles. *Int J Life Cycle Assess* 21:1009–1034. doi: 10.1007/s11367-016-1070-4
- Opher T, Shapira A, Friedler E (2018) A comparative social life cycle assessment of urban domestic water reuse alternatives. *Int J Life Cycle Assess* 23:1315–1330. doi: 10.1007/s11367-017-1356-1
- Paleari M, Lavagna M, Campioli A (2016) The assessment of the relevance of building components and life phases for the environmental profile of nearly zero-energy buildings: life cycle assessment of a multifamily building in Italy. *Int J Life Cycle Assess* 21:1667–1690. doi: 10.1007/s11367-016-1133-6
- Pingmuanglek P, Jakrawatana N, Gheewala SH (2017) Freshwater use analysis of cassava for food feed fuel in the Mun River basin, Thailand. *Int J Life Cycle Assess* 22:1705–1717. doi: 10.1007/s11367-017-1286-y
- Pini M, Ferrari AM, Gamberini R, Neri P, Rimini B (2014) Life cycle assessment of a large, thin ceramic tile with advantageous technological properties. *Int J Life Cycle Assess* 19:1567–1580. doi: 10.1007/s11367-014-0764-8
- Plumblee J, Klotz L (2014) Marlo's windows: why it is a mistake to ignore hazard resistance in LCA. *Int J Life Cycle Assess* 19:1173–1178. doi: 10.1007/s11367-014-0741-2
- Pommier R, Grimaud G, Prinçaud M, Perry N, Sonnemann G (2016) Comparative environmental life cycle assessment of materials in wooden boat ecodesign. *Int J Life Cycle Assess* 21:265–275. doi: 10.1007/s11367-015-1009-1
- Potting J, van der Harst E (2015) Facility arrangements and the environmental performance of disposable and reusable cups. *Int J Life Cycle Assess* 20:1143–1154. doi: 10.1007/s11367-015-0914-7
- Quinteiro P, Dias AC, Ridoutt BG, Arroja L (2014) A framework for modelling the transport and deposition of eroded particles towards water systems in a life cycle inventory. *Int J Life Cycle Assess* 19:1200–1213. doi: 10.1007/s11367-014-0730-5
- Reuter MA, van Schaik A, Gediga J (2015) Simulation-based design for resource efficiency of metal production and recycling systems: Cases - copper production and recycling, e-waste (LED lamps) and nickel pig iron. *Int J Life Cycle Assess* 20:671–693. doi: 10.1007/s11367-015-0860-4

- Ribal J, Fenollosa ML, García-Segovia P, Clemente G, Escobar N, Sanjuán N (2016) Designing healthy, climate friendly and affordable school lunches. *Int J Life Cycle Assess* 21:631–645. doi: 10.1007/s11367-015-0905-8
- Rigamonti L, Falbo A, Zampori L, Sala S (2017) Supporting a transition towards sustainable circular economy: sensitivity analysis for the interpretation of LCA for the recovery of electric and electronic waste. *Int J Life Cycle Assess* 22:1278–1287. doi: 10.1007/s11367-016-1231-5
- Robertson K, Garnham M, Symes W (2014) Life cycle carbon footprint of the packaging and transport of New Zealand kiwifruit. *Int J Life Cycle Assess* 19:1693–1704. doi: 10.1007/s11367-014-0775-5
- Rönnlund I, Reuter M, Horn S, Aho J, Aho M, Päällysaho M, Ylimäki L, Pursula T (2016) Eco-efficiency indicator framework implemented in the metallurgical industry: part 2—a case study from the copper industry. *Int J Life Cycle Assess* 21:1719–1748. doi: 10.1007/s11367-016-1123-8
- Ros-Dosdá T, Celades I, Monfort E, Fullana-i-Palmer P (2018) Environmental profile of Spanish porcelain stoneware tiles. *Int J Life Cycle Assess* 23:1562–1580. doi: 10.1007/s11367-017-1377-9
- Salzer C, Wallbaum H, Ostermeyer Y, Kono J (2017) Environmental performance of social housing in emerging economies: life cycle assessment of conventional and alternative construction methods in the Philippines. *Int J Life Cycle Assess* 22:1785–1801. doi: 10.1007/s11367-017-1362-3
- Sanyé-Mengual E, Oliver-Solà J, Montero JI, Rieradevall J (2015) An environmental and economic life cycle assessment of rooftop greenhouse (RTG) implementation in Barcelona, Spain. Assessing new forms of urban agriculture from the greenhouse structure to the final product level. *Int J Life Cycle Assess* 20:350–366. doi: 10.1007/s11367-014-0836-9
- Schowaneck D, Borsboom-patel T, Bouvy A, Colling J, de Ferrer JA, Eggers D, Groenke K, Gruenenwald T, Martinsson J, Mckeown P, Miller B, Moons S, Niedermann K, Pérez M, Schneider C, Viot J-F (2018) New and updated life cycle inventories for surfactants used in European detergents : summary of the ERASM surfactant life cycle and ecofootprinting project. 23:887–889. doi: 10.1007/s11367-017-1384-x
- Seier M, Zimmermann T (2014) Environmental impacts of decommissioning nuclear power plants: methodical challenges, case study, and implications. *Int J Life Cycle Assess* 19:1919–1932. doi: 10.1007/s11367-014-0794-2
- Sengupta D, Hawkins TR, Smith RL (2015) Using national inventories for estimating environmental impacts of products from industrial sectors: a case study of ethanol and gasoline. *Int J Life Cycle Assess* 20:597–607. doi: 10.1007/s11367-015-0859-x
- Silva CB, Valente LMP, Matos E, Brandão M, Neto B (2018) Life cycle assessment of aquafeed ingredients. *Int J Life Cycle Assess* 23:995–1017. doi: 10.1007/s11367-017-1414-8
- Silveira EA, Caldeira-Pires A, Luz SM, Silveira CM (2017) Mass and energy allocation method analysis for an oil refinery characterization using multi-scale modeling. *Int J Life Cycle Assess* 22:1815–1822. doi: 10.1007/s11367-017-1369-9
- Steenwerth KL, Strong EB, Greenhut RF, et al (2015) Life cycle greenhouse gas, energy, and water assessment of wine grape production in California. *Int J Life Cycle Assess* 20:1243–1253. doi: 10.1007/s11367-015-0935-2
- Struhala K, Stránská Z, Pěňčík J, Matějka L (2014) Environmental assessment of thermal insulation composite material. *Int J Life Cycle Assess* 19:1908–1918. doi: 10.1007/s11367-014-0796-0
- Sun X, Liu J, Lu B, Zhang P, Zhao M (2017) Life cycle assessment-based selection of a sustainable lightweight automotive engine hood design. *Int J Life Cycle Assess* 22:1373–1383. doi: 10.1007/s11367-016-1254-y
- Tagliaferri C, Clift R, Lettieri P, Chapman C (2017) Liquefied natural gas for the UK: a life cycle assessment. *Int J Life Cycle Assess* 22:1944–1956. doi: 10.1007/s11367-017-1285-z
- Tähkämö L, Räsänen RS, Halonen L (2016) Life cycle cost comparison of high-pressure sodium and light-emitting diode luminaires in street lighting. *Int J Life Cycle Assess* 21:137–145. doi: 10.1007/s11367-015-1000-x
- Tan Q, Song Q, Li J (2015) The environmental performance of fluorescent lamps in China, assessed with the LCA method. *Int J Life Cycle Assess* 20:807–818. doi: 10.1007/s11367-015-0870-2

- Tang L, Higa M, Tanaka N, Itsubo N (2018) Assessment of global warming impact on biodiversity using the extinction risk index in LCIA: a case study of Japanese plant species. *Int J Life Cycle Assess* 23:314–323. doi: 10.1007/s11367-017-1319-6
- Teodosiu C, Barjoveanu G, Sluser BR, Popa SAE, Trofin O (2016) Environmental assessment of municipal wastewater discharges: a comparative study of evaluation methods. *Int J Life Cycle Assess* 21:395–411. doi: 10.1007/s11367-016-1029-5
- Touceda MI, Neila FJ, Degrez M (2018) Modeling socioeconomic pathways to assess sustainability: a tailored development for housing retrofit. *Int J Life Cycle Assess* 23:710–725. doi: 10.1007/s11367-016-1194-6
- Trigaux D, Wijnants L, De Troyer F, Allacker K (2017) Life cycle assessment and life cycle costing of road infrastructure in residential neighbourhoods. *Int J Life Cycle Assess* 22:938–951. doi: 10.1007/s11367-016-1190-x
- Tsang M, Meyer D, Hawkins T, et al (2014) Life cycle assessment for emerging materials: case study of a garden bed constructed from lumber produced with three different copper treatments. *Int J Life Cycle Assess* 19:1345–1355. doi: 10.1007/s11367-014-0726-1
- Turconi R, Simonsen CG, Byriell IP, Astrup T (2014) Life cycle assessment of the Danish electricity distribution network. *Int J Life Cycle Assess* 19:100–108. doi: 10.1007/s11367-013-0632-y
- Turk J, Pranjić AM, Tomasin P, Škrlep L, Antelo J, Favaro M, Škapin AS, Bernardi A, Ranogajec J, Chiurato M (2017) Environmental performance of three innovative calcium carbonate-based consolidants used in the field of built cultural heritage. *Int J Life Cycle Assess* 22:1329–1338. doi: 10.1007/s11367-017-1260-8
- Tyszler M, Kramer G, Blonk H (2016) Just eating healthier is not enough: studying the environmental impact of different diet scenarios for Dutch women (31–50 years old) by linear programming. *Int J Life Cycle Assess* 21:701–709. doi: 10.1007/s11367-015-0981-9
- Uche J, Martínez-Gracia A, Carmona U (2014) Life cycle assessment of the supply and use of water in the Segura Basin. *Int J Life Cycle Assess* 19:688–704. doi: 10.1007/s11367-013-0677-y
- Valente C, Brekke A, Modahl IS (2018) Testing environmental and social indicators for biorefineries: bioethanol and biochemical production. *Int J Life Cycle Assess* 23:581–596. doi: 10.1007/s11367-017-1331-x
- Valero Navazo JM, Villalba Méndez G, Talens Peiró L (2014) Material flow analysis and energy requirements of mobile phone material recovery processes. *Int J Life Cycle Assess* 19:567–579. doi: 10.1007/s11367-013-0653-6
- Van Der Velden NM, Patel MK, Vogtländer JG (2014) LCA benchmarking study on textiles made of cotton, polyester, nylon, acryl, or elastane. *Int J Life Cycle Assess* 19:331–356. doi: 10.1007/s11367-013-0626-9
- van Dooren C, Aiking H (2016) Defining a nutritionally healthy, environmentally friendly, and culturally acceptable Low Lands Diet. *Int J Life Cycle Assess* 21:688–700. doi: 10.1007/s11367-015-1007-3
- Van Genderen E, Wildnauer M, Santero N, Sidi N (2016) A global life cycle assessment for primary zinc production. *Int J Life Cycle Assess* 21:1580–1593. doi: 10.1007/s11367-016-1131-8
- van Kempen EA, Spiliotopoulou E, Stojanovski G, de Leeuw S (2017) Using life cycle sustainability assessment to trade off sourcing strategies for humanitarian relief items. *Int J Life Cycle Assess* 22:1718–1730. doi: 10.1007/s11367-016-1245-z
- Vázquez-Rowe I, Kahhat R, Santillán-Saldívar J, Quispe I, Bentín M (2017) Carbon footprint of pomegranate (*Punica granatum*) cultivation in a hyper-arid region in coastal Peru. *Int J Life Cycle Assess* 22:601–617. doi: 10.1007/s11367-016-1046-4
- Vázquez-Rowe I, Marvuglia A, Flammang K, Braun C, Leopold U, Benetto E (2014) The use of temporal dynamics for the automatic calculation of land use impacts in LCA using R programming environment: A case study for increased bioenergy production in Luxembourg. *Int J Life Cycle Assess* 19:500–516. doi: 10.1007/s11367-013-0669-y
- Villanueva-Rey P, Vázquez-Rowe I, Arias A, Moreira MT, Feijoo G (2018) The importance of using life cycle assessment in policy support to determine the sustainability of fishing fleets: a case study for the small-scale xeito fishery in Galicia, Spain. *Int J Life Cycle Assess* 23:1091–1106. doi: 10.1007/s11367-017-1402-z

- Villares M, Işıldar A, van der Giesen C, Guinée J (2017) Does ex ante application enhance the usefulness of LCA? A case study on an emerging technology for metal recovery from e-waste. *Int J Life Cycle Assess* 22:1618–1633. doi: 10.1007/s11367-017-1270-6
- Williams SRO, Fisher PD, Berrisford T, Moate PJ, Reynard K (2014) Reducing methane on-farm by feeding diets high in fat may not always reduce life cycle greenhouse gas emissions. *Int J Life Cycle Assess* 19:69–78. doi: 10.1007/s11367-013-0619-8
- Xue JF, Liu SL, Chen Z Du, Chen F, Lal R, Tang H-M, Zhang H-L (2014) Assessment of carbon sustainability under different tillage systems in a double rice cropping system in Southern China. *Int J Life Cycle Assess* 19:1581–1592. doi: 10.1007/s11367-014-0768-4
- Xue X, Hawkins TR, Ingwersen WW, Smith RL (2015) Demonstrating an approach for including pesticide use in life-cycle assessment: Estimating human and ecosystem toxicity of pesticide use in Midwest corn farming. *Int J Life Cycle Assess* 20:1117–1126. doi: 10.1007/s11367-015-0902-y
- Yacout DMM, Abd El-Kawi MA, Hassouna MS (2016a) Cradle to gate environmental impact assessment of acrylic fiber manufacturing. *Int J Life Cycle Assess* 21:326–336. doi: 10.1007/s11367-015-1023-3
- Yacout DMM, Soliman NF, Yacout MM (2016b) Comparative life cycle assessment (LCA) of Tilapia in two production systems: semi-intensive and intensive. *Int J Life Cycle Assess* 21:806–819. doi: 10.1007/s11367-016-1061-5
- Yami TL, Du J, Brunson LR, Chamberlain JF, Sabatini DA, Butler EC (2015) Life cycle assessment of adsorbents for fluoride removal from drinking water in East Africa. *Int J Life Cycle Assess* 20:1277–1286. doi: 10.1007/s11367-015-0920-9
- Yasin S, Behary N, Rovero G, Kumar V (2016) Statistical analysis of use-phase energy consumption of textile products. *Int J Life Cycle Assess* 21:1776–1788. doi: 10.1007/s11367-016-1129-2
- Yuan Z, Zhang Y, Liu X (2016) Life cycle assessment of horizontal-axis washing machines in China. *Int J Life Cycle Assess* 21:15–28. doi: 10.1007/s11367-015-0993-5
- Ziegler F, Groen EA, Hornborg S, Bokkers EAM, Karlsen KM, de Boer IJM (2018) Assessing broad life cycle impacts of daily onboard decision-making, annual strategic planning, and fisheries management in a northeast Atlantic trawl fishery. *Int J Life Cycle Assess* 23:1357–1367. doi: 10.1007/s11367-015-0898-3

#### **1.1.4 No mention of uncertainty**

- Arpornpong N, Sabatini DA, Khaodhiar S, Charoensaeng A (2015) Life cycle assessment of palm oil microemulsion-based biofuel. *Int J Life Cycle Assess* 20:913–926. doi: 10.1007/s11367-015-0888-5
- Astudillo MF, AzariJafari H (2018) Estimating the global warming emissions of the LCAXVII conference: connecting flights matter. *Int J Life Cycle Assess* 23:1512–1516. doi: 10.1007/s11367-018-1479-z
- Blanco-Davis E, del Castillo F, Zhou P (2014) Fouling release coating application as an environmentally efficient retrofit: a case study of a ferry-type ship. *Int J Life Cycle Assess* 19:1705–1715. doi: 10.1007/s11367-014-0780-8
- Buxmann K, Koehler A, Thylmann D (2016) Water scarcity footprint of primary aluminium. *Int J Life Cycle Assess* 21:1605–1615. doi: 10.1007/s11367-015-0997-1
- Casals LC, García BA, Aguesse F, Iturrondobeitia A (2017) Second life of electric vehicle batteries: relation between materials degradation and environmental impact. *Int J Life Cycle Assess* 22:82–93. doi: 10.1007/s11367-015-0918-3
- Chen W, Holden NM (2017) Social life cycle assessment of average Irish dairy farm. *Int J Life Cycle Assess* 22:1459–1472. doi: 10.1007/s11367-016-1250-2
- Cheung CW, Berger M, Finkbeiner M (2018) Comparative life cycle assessment of re-use and replacement for video projectors. *Int J Life Cycle Assess* 23:82–94. doi: 10.1007/s11367-017-1301-3
- Chiu SLH, Lo IMC, Woon KS, Yan DYS (2016) Life cycle assessment of waste treatment strategy for sewage sludge and food waste in Macau: perspectives on environmental and energy production performance. *Int J Life Cycle Assess* 21:176–189. doi: 10.1007/s11367-015-1008-2
- Chong D, Wang Y (2017) Impacts of flexible pavement design and management decisions on life cycle energy consumption and carbon footprint. *Int J Life Cycle Assess* 22:952–971. doi: 10.1007/s11367-016-1202-x



- Civit B, Arena AP, Allende D (2014) Determination of regional acidification factors for Argentina. *Int J Life Cycle Assess* 19:1632–1642. doi: 10.1007/s11367-012-0427-6
- Coelho CRV, Michelsen O (2014) Land use impacts on biodiversity from kiwifruit production in New Zealand assessed with global and national datasets. *Int J Life Cycle Assess* 19:285–296. doi: 10.1007/s11367-013-0628-7
- Corona B, Escudero L, Quéméré G, Luque-Heredia I, San Miguel G (2017) Energy and environmental life cycle assessment of a high concentration photovoltaic power plant in Morocco. *Int J Life Cycle Assess* 22:364–373. doi: 10.1007/s11367-016-1157-y
- Corona B, San Miguel G, Cerrajero E (2014) Life cycle assessment of concentrated solar power (CSP) and the influence of hybridising with natural gas. *Int J Life Cycle Assess* 19:1264–1275. doi: 10.1007/s11367-014-0728-z
- Cuéllar-Franca RM, Azapagic A (2014) Life cycle cost analysis of the UK housing stock. *Int J Life Cycle Assess* 19:174–193. doi: 10.1007/s11367-013-0610-4
- Davidson AJ, Binks SP, Gediga J (2016) Lead industry life cycle studies: environmental impact and life cycle assessment of lead battery and architectural sheet production. *Int J Life Cycle Assess* 21:1624–1636. doi: 10.1007/s11367-015-1021-5
- Daystar J, Venditti R, Kelley SS (2017) Dynamic greenhouse gas accounting for cellulosic biofuels: implications of time based methodology decisions. *Int J Life Cycle Assess* 22:812–826. doi: 10.1007/s11367-016-1184-8
- De Marco I, Miranda S, Riemma S, Iannone R (2015) Environmental assessment of drying methods for the production of apple powders. *Int J Life Cycle Assess* 20:1659–1672. doi: 10.1007/s11367-015-0971-y
- Di Maria F, Micale C (2015) Life cycle analysis of incineration compared to anaerobic digestion followed by composting for managing organic waste: the influence of system components for an Italian district. *Int J Life Cycle Assess* 20:377–388. doi: 10.1007/s11367-014-0833-z
- Dong YH, Ng ST (2016) A modeling framework to evaluate sustainability of building construction based on LCSEA. *Int J Life Cycle Assess* 21:555–568. doi: 10.1007/s11367-016-1044-6
- Eberle U, Fels J (2016) Environmental impacts of German food consumption and food losses. *Int J Life Cycle Assess* 21:759–772. doi: 10.1007/s11367-015-0983-7
- Edwards L, Knight J, Handler R, Abraham J, Blowers P (2016) The methodology and results of using life cycle assessment to measure and reduce the greenhouse gas emissions footprint of “Major Events” at the University of Arizona. *Int J Life Cycle Assess* 21:536–554. doi: 10.1007/s11367-016-1038-4
- Felix M, Gheewala SH (2014) Environmental toxicity potential from electricity generation in Tanzania. *Int J Life Cycle Assess* 19:1424–1432. doi: 10.1007/s11367-014-0748-8
- Fusi A, Castellani V, Bacenetti J, Cocetta G, Fiala M, Guidetti R (2016) The environmental impact of the production of fresh cut salad: a case study in Italy. *Int J Life Cycle Assess* 21:162–175. doi: 10.1007/s11367-015-1019-z
- Garba NA, Duckers LJ, Hall WJ (2014) Climate change impacts on life cycle greenhouse gas (GHG) emissions savings of biomethanol from corn and soybean. *Int J Life Cycle Assess* 19:806–813. doi: 10.1007/s11367-013-0680-3
- García-Segura T, Yepes V, Alcalá J (2014) Life cycle greenhouse gas emissions of blended cement concrete including carbonation and durability. *Int J Life Cycle Assess* 19:3–12. doi: 10.1007/s11367-013-0614-0
- Garcia R, Gregory J, Freire F (2015) Dynamic fleet-based life-cycle greenhouse gas assessment of the introduction of electric vehicles in the Portuguese light-duty fleet. *Int J Life Cycle Assess* 20:1287–1299. doi: 10.1007/s11367-015-0921-8
- Gemechu ED, Sonnemann G, Young SB (2017) Geopolitical-related supply risk assessment as a complement to environmental impact assessment: the case of electric vehicles. *Int J Life Cycle Assess* 22:31–39. doi: 10.1007/s11367-015-0917-4
- Gruber LM, Brandstetter CP, Bos U, Lindner JP, Albrecht S (2016) LCA study of unconsumed food and the influence of consumer behavior. *Int J Life Cycle Assess* 21:773–784. doi: 10.1007/s11367-015-0933-4

- Guerra JPM, Coleta JR, Arruda LCM, Silva GA, Kulay L (2014) Comparative analysis of electricity cogeneration scenarios in sugarcane production by LCA. *Int J Life Cycle Assess* 19:814–825. doi: 10.1007/s11367-014-0702-9
- Hannouf M, Assefa G (2018) Subcategory assessment method for social life cycle assessment: a case study of high-density polyethylene production in Alberta, Canada. *Int J Life Cycle Assess* 23:116–132. doi: 10.1007/s11367-017-1303-1
- Heijungs R, De Koning A, Guinée JB (2014) Maximizing affluence within the planetary boundaries. *Int J Life Cycle Assess* 19:1331–1335. doi: 10.1007/s11367-014-0729-y
- Hernandez M, Messagie M, Hegazy O, Marengo L, Winter O, Van Mierlo J (2017) Environmental impact of traction electric motors for electric vehicles applications. *Int J Life Cycle Assess* 22:54–65. doi: 10.1007/s11367-015-0973-9
- Hesser F, Wohner B, Meints T, Stern T, Windsperger A (2017) Integration of LCA in R&D by applying the concept of payback period: case study of a modified multilayer wood parquet. *Int J Life Cycle Assess* 22:307–316. doi: 10.1007/s11367-016-1173-y
- Hokazono S, Hayashi K (2015) Life cycle assessment of organic paddy rotation systems using land- and product-based indicators: a case study in Japan. *Int J Life Cycle Assess* 20:1061–1075. doi: 10.1007/s11367-015-0906-7
- Hong J, Zhang F, Xu C, Xu X, Li X (2015) Evaluation of life cycle inventory at macro level: a case study of mechanical coke production in China. *Int J Life Cycle Assess* 20:751–764. doi: 10.1007/s11367-015-0876-9
- Hossain MU, Poon CS, Dong YH, Lo IMC, Cheng JCP (2018) Development of social sustainability assessment method and a comparative case study on assessing recycled construction materials. *Int J Life Cycle Assess* 23:1654–1674. doi: 10.1007/s11367-017-1373-0
- Hunsager EA, Bach M, Breuer L (2014) An institutional analysis of EPD programs and a global PCR registry. *Int J Life Cycle Assess* 19:786–795. doi: 10.1007/s11367-014-0711-8
- Ilari A, Duca D (2018) Energy and environmental sustainability of nursery step finalized to “fresh cut” salad production by means of LCA. *Int J Life Cycle Assess* 23:800–810. doi: 10.1007/s11367-017-1341-8
- Iofrida N, De Luca AI, Strano A, Gulisano G (2018) Can social research paradigms justify the diversity of approaches to social life cycle assessment? *Int J Life Cycle Assess* 23:464–480. doi: 10.1007/s11367-016-1206-6
- Joensuu K, Saarinen M (2017) Applying soil quality indicators in the context of life cycle assessment in a Finnish case study. *Int J Life Cycle Assess* 22:1339–1353. doi: 10.1007/s11367-016-1247-x
- Jungbluth N, Keller R, König A (2016) ONE TWO WE—life cycle management in canteens together with suppliers, customers and guests. *Int J Life Cycle Assess* 21:646–653. doi: 10.1007/s11367-015-0982-8
- Khonpikul S, Jakrawatana N, Sangkaew P, Gheewala SH (2017) Resource use and improvement strategy analysis of the livestock and feed production supply chain in Thailand. *Int J Life Cycle Assess* 22:1692–1704. doi: 10.1007/s11367-017-1361-4
- Kikuchi Y, Hirao M, Ookubo T, Sasaki A (2014) Design of recycling system for poly(methyl methacrylate) (PMMA). Part 1: Recycling scenario analysis. *Int J Life Cycle Assess* 19:120–129. doi: 10.1007/s11367-013-0624-y
- Kulay L, Gripp VS, Nogueira AR, Silva GA (2017) Verifying the effectiveness of environmental performance improvement actions in the chain of production of an agrochemical produced in Brazil. *Int J Life Cycle Assess* 22:644–655. doi: 10.1007/s11367-016-1108-7
- Lasvaux S, Lebert A, Achim F, Grannec F, Hoxha E, Nibel S, Schiopu N, Chevalier J (2017) Towards guidance values for the environmental performance of buildings: application to the statistical analysis of 40 low-energy single family houses’ LCA in France. *Int J Life Cycle Assess* 22:657–674. doi: 10.1007/s11367-016-1253-z
- Lazarevic D (2018) The legitimacy of life cycle assessment in the waste management sector. *Int J Life Cycle Assess* 23:1415–1428. doi: 10.1007/s11367-015-0884-9

- Lewandowska A, Noskowiak A, Pajchrowski G, Zarebska J (2015) Between full LCA and energy certification methodology—a comparison of six methodological variants of buildings environmental assessment. *Int J Life Cycle Assess* 20:9–22. doi: 10.1007/s11367-014-0805-3
- Li C, Cui S, Nie Z, Gong X, Wang Z, Itsubo N (2015) The LCA of portland cement production in China. *Int J Life Cycle Assess* 20:117–127. doi: 10.1007/s11367-014-0804-4
- Li W, Wang Q, Jin J, Li S (2014) A life cycle assessment case study of ground rubber production from scrap tires. *Int J Life Cycle Assess* 19:1833–1842. doi: 10.1007/s11367-014-0793-3
- Limphitakphong N, Pharino C, Kanchanapiya P (2016) Environmental impact assessment of centralized municipal wastewater management in Thailand. *Int J Life Cycle Assess* 21:1789–1798. doi: 10.1007/s11367-016-1130-9
- Lindqvist M, Palme U, Lindner JP (2016) A comparison of two different biodiversity assessment methods in LCA—a case study of Swedish spruce forest. *Int J Life Cycle Assess* 21:190–201. doi: 10.1007/s11367-015-1012-6
- Lozanovski A, Lindner JP, Bos U (2014) Environmental evaluation and comparison of selected industrial scale biomethane production facilities across Europe. *Int J Life Cycle Assess* 19:1823–1832. doi: 10.1007/s11367-014-0791-5
- Maxineasa SG, Taranu N, Bejan L, Isopescu D, Banu OM (2015) Environmental impact of carbon fibre-reinforced polymer flexural strengthening solutions of reinforced concrete beams. *Int J Life Cycle Assess* 20:1343–1358. doi: 10.1007/s11367-015-0940-5
- Mendes Campolina J, São Leandro Sigrist C, Faulstich de Paiva JM, Nunes AO, da Silva Moris VA (2017) A study on the environmental aspects of WEEE plastic recycling in a Brazilian company. *Int J Life Cycle Assess* 22:1957–1968. doi: 10.1007/s11367-017-1282-2
- Mendoza JMF, Feced M, Feijoo G, Josa A, Gabarrell X, Rieradevall J (2014) Life cycle inventory analysis of granite production from cradle to gate. *Int J Life Cycle Assess* 19:153–165. doi: 10.1007/s11367-013-0637-6
- Mistry M, Gediga J, Boonzaier S (2016a) Life cycle assessment of nickel products. *Int J Life Cycle Assess* 21:1559–1572. doi: 10.1007/s11367-016-1085-x
- Mistry M, Koffler C, Wong S (2016b) LCA and LCC of the world's longest pier: a case study on nickel-containing stainless steel rebar. *Int J Life Cycle Assess* 21:1637–1644. doi: 10.1007/s11367-016-1080-2
- Mori M, Jensterle M, Mržljak T, Drobnič B (2014) Life-cycle assessment of a hydrogen-based uninterruptible power supply system using renewable energy. *Int J Life Cycle Assess* 19:1810–1822. doi: 10.1007/s11367-014-0790-6
- Napolano L, Menna C, Asprone D, Prota A, Manfredi G (2015) Life cycle environmental impact of different replacement options for a typical old flat roof. *Int J Life Cycle Assess* 20:694–708. doi: 10.1007/s11367-015-0852-4
- Nilsalab P, Gheewala SH, Mungkung R, Perret SR, Silalertruksa R, Bonnet S (2017) Water demand and stress from oil palm-based biodiesel production in Thailand. *Int J Life Cycle Assess* 22:1666–1677. doi: 10.1007/s11367-016-1213-7
- Noël JA, Allred PM, White MA (2015) Life cycle assessment of two biologically produced phase change materials and their related products. *Int J Life Cycle Assess* 20:367–376. doi: 10.1007/s11367-014-0831-1
- Noh S, Son Y, Bong T, Park J (2014) Characterization of CO<sub>2</sub> emissions during construction of reservoir embankment elevation in South Korea. *Int J Life Cycle Assess* 19:42–51. doi: 10.1007/s11367-013-0620-2
- O'Brien D, Brennan P, Humphreys J, Ruane E, Shalloo L (2014) An appraisal of carbon footprint of milk from commercial grass-based dairy farms in Ireland according to a certified life cycle assessment methodology. *Int J Life Cycle Assess* 19:1469–1481. doi: 10.1007/s11367-014-0755-9
- Ochoa Sosa R, Hernández Espinoza A, Garfias Royo M, Morillón Gálvez D (2017) Life cycle energy and costs of sprawling and compact neighborhoods. *Int J Life Cycle Assess* 22:618–627. doi: 10.1007/s11367-016-1100-2

- Ono Y, Motoshita M, Itsubo N (2015) Development of water footprint inventory database on Japanese goods and services distinguishing the types of water resources and the forms of water uses based on input-output analysis. *Int J Life Cycle Assess* 20:1456–1467. doi: 10.1007/s11367-015-0928-1
- Palma-Rojas S, Caldeira-Pires A, Nogueira JM (2017) Environmental and economic hybrid life cycle assessment of bagasse-derived ethanol produced in Brazil. *Int J Life Cycle Assess* 22:317–327. doi: 10.1007/s11367-015-0892-9
- Panesar DK, Seto KE, Churchill CJ (2017) Impact of the selection of functional unit on the life cycle assessment of green concrete. *Int J Life Cycle Assess* 22:1969–1986. doi: 10.1007/s11367-017-1284-0
- Partey ST, Frith OB, Kwaku MY, Sarfo DA (2017) Comparative life cycle analysis of producing charcoal from bamboo, teak, and acacia species in Ghana. *Int J Life Cycle Assess* 22:758–766. doi: 10.1007/s11367-016-1220-8
- Pastor MM, Schatz T, Traverso M, Wagner V, Hinrichsen O (2018) Social aspects of water consumption: risk of access to unimproved drinking water and to unimproved sanitation facilities—an example from the automobile industry. *Int J Life Cycle Assess* 23:940–956. doi: 10.1007/s11367-017-1342-7
- Pelletier N, Leip A (2014) Quantifying anthropogenic mobilization, flows (in product systems) and emissions of fixed nitrogen in process-based environmental life cycle assessment: rationale, methods and application to a life cycle inventory. *Int J Life Cycle Assess* 19:166–173. doi: 10.1007/s11367-013-0622-0
- Pelletier N, Ustaoglu E, Benoit C, Norris G, Rosenbaum E, Vasta A, Sala S (2018) Social sustainability in trade and development policy. *Int J Life Cycle Assess* 23:629–639. doi: 10.1007/s11367-016-1059-z
- Pergola M, Gialdini A, Celano G, Basile M, Caniani D, Cozzi M, Gentilesca T, Mancini IM, Pastore V, Romano S, Ventura G, Ripullone F (2018) An environmental and economic analysis of the wood-pellet chain: two case studies in Southern Italy. *Int J Life Cycle Assess* 23:1675–1684. doi: 10.1007/s11367-017-1374-z
- Peters GM, Murphy KR, Adamsen APS, Bruun S, Svanström M, ten Hoeve M (2014) Improving odour assessment in LCA—the odour footprint. *Int J Life Cycle Assess* 19:1891–1900. doi: 10.1007/s11367-014-0782-6
- Petti L, Sanchez Ramirez PK, Traverso M, Ugaya CML (2018) An Italian tomato “Cuore di Bue” case study: challenges and benefits using subcategory assessment method for social life cycle assessment. *Int J Life Cycle Assess* 23:569–580. doi: 10.1007/s11367-016-1175-9
- Pina C, Elduque D, Javierre C, Martínez E, Jiménez E (2015) Influence of mechanical design on the evolution of the environmental impact of an induction hob. *Int J Life Cycle Assess* 20:937–946. doi: 10.1007/s11367-015-0890-y
- Pizzirani S, McLaren SJ, Forster ME, Pohatu P, Porou TTW, Warmenhoven TA (2018) The distinctive recognition of culture within LCSA: realising the quadruple bottom line. *Int J Life Cycle Assess* 23:663–682. doi: 10.1007/s11367-016-1193-7
- Prasad A, Sotenko M, Blenkinsopp T, Coles SR (2016) Life cycle assessment of lignocellulosic biomass pretreatment methods in biofuel production. *Int J Life Cycle Assess* 21:44–50. doi: 10.1007/s11367-015-0985-5
- Ramirez PKS, Petti L, Brones F, Ugaya CML (2016) Subcategory assessment method for social life cycle assessment. Part 2: application in Natura’s cocoa soap. *Int J Life Cycle Assess* 21:106–117. doi: 10.1007/s11367-015-0964-x
- Rodrigues C, Freire F (2017) Environmental impact trade-offs in building envelope retrofit strategies. *Int J Life Cycle Assess* 22:557–570. doi: 10.1007/s11367-016-1064-2
- Roos S, Peters GM (2015) Three methods for strategic product toxicity assessment—the case of the cotton T-shirt. *Int J Life Cycle Assess* 20:903–912. doi: 10.1007/s11367-015-0895-6
- Saner D, Beretta C, Jäggi B, Juraske R, Stoessel F, Hellweg S (2016) FoodPrints of households. *Int J Life Cycle Assess* 21:654–663. doi: 10.1007/s11367-015-0924-5
- Sanjuan-Delmás D, Hernando-Canovas E, Pujadas P, de la Fuente A, Gabarrell X, Rieradevall J, Josa A (2015) Environmental and geometric optimisation of cylindrical drinking water storage tanks. *Int J Life Cycle Assess* 20:1612–1624. doi: 10.1007/s11367-015-0963-y
- Scherer L, Tomasik B, Rueda O, Pfister S (2018) Framework for integrating animal welfare into life cycle sustainability assessment. *Int J Life Cycle Assess* 23:1476–1490. doi: 10.1007/s11367-017-1420-x

- Schneider L, Berger M, Schüler-Hainsch E, Knöfel S, Ruhland K, Mosig J, Bach V, Finkbeiner M (2014) The economic resource scarcity potential (ESP) for evaluating resource use based on life cycle assessment. *Int J Life Cycle Assess* 19:601–610. doi: 10.1007/s11367-013-0666-1
- Sedpho S, Sampattagul S, Chaiyat N, Gheewala SH (2017) Conventional and exergetic life cycle assessment of organic rankine cycle implementation to municipal waste management: the case study of Mae Hong Son (Thailand). *Int J Life Cycle Assess* 22:1773–1784. doi: 10.1007/s11367-016-1216-4
- Sharma P, Humphreys J, Holden NM (2018) The effect of local climate and soil drainage on the environmental impact of grass-based milk production. *Int J Life Cycle Assess* 23:26–40. doi: 10.1007/s11367-017-1302-2
- Shi J, Li T, Zhang H, Peng S, Liu Z, Jiang Q (2015) Energy consummation and environmental emissions assessment of a refrigeration compressor based on life cycle assessment methodology. *Int J Life Cycle Assess* 20:947–956. doi: 10.1007/s11367-015-0896-5
- Silva DAL, Lahr FAR, Pavan ALR, Saavedra YMB, Mendes NC, Sousa SR, Sanches R, Ometto AR (2014) Do wood-based panels made with agro-industrial residues provide environmentally benign alternatives? An LCA case study of sugarcane bagasse addition to particle board manufacturing. *Int J Life Cycle Assess* 19:1767–1778. doi: 10.1007/s11367-014-0776-4
- Singh P, Gundimeda H, Stucki M (2014) Environmental footprint of cooking fuels: A life cycle assessment of ten fuel sources used in Indian households. *Int J Life Cycle Assess* 19:1036–1048. doi: 10.1007/s11367-014-0699-0
- Singh RK, Gupta U (2018) Social life cycle assessment in Indian steel sector: a case study. *Int J Life Cycle Assess* 23:921–939. doi: 10.1007/s11367-017-1427-3
- Smetana S, Mathys A, Knoch A, Heinz V (2015) Meat alternatives: life cycle assessment of most known meat substitutes. *Int J Life Cycle Assess* 20:1254–1267. doi: 10.1007/s11367-015-0931-6
- Sonesson UG, Lorentzon K, Andersson A, et al (2016) Paths to a sustainable food sector: integrated design and LCA of future food supply chains: the case of pork production in Sweden. *Int J Life Cycle Assess* 21:664–676. doi: 10.1007/s11367-015-0969-5
- Souza A, Watanabe MDB, Cavalett O, Ugaya CML, Bonomi A (2018) Social life cycle assessment of first and second-generation ethanol production technologies in Brazil. *Int J Life Cycle Assess* 23:617–628. doi: 10.1007/s11367-016-1112-y
- Stichnothe H, Schuchardt F, Rahutomo S (2014) European renewable energy directive: Critical analysis of important default values and methods for calculating greenhouse gas (GHG) emissions of palm oil biodiesel. *Int J Life Cycle Assess* 19:1294–1304. doi: 10.1007/s11367-014-0738-x
- Strazza C, Del Borghi A, Gallo M, Manariti R, Missanelli E (2015) Investigation of green practices for paper use reduction onboard a cruise ship—a life cycle approach. *Int J Life Cycle Assess* 20:982–993. doi: 10.1007/s11367-015-0900-0
- Subramanian V, Semenzin E, Zabeo A, Saling P, Ligthart T, van Harmelen T, Malsch I, Hristozov D, Marcomini A (2018) Assessing the social impacts of nano-enabled products through the life cycle: the case of nano-enabled biocidal paint. *Int J Life Cycle Assess* 23:348–356. doi: 10.1007/s11367-017-1324-9
- Sun B, Nie Z, Gao F, Liu Y, Wang Z, Gong X (2015) Cumulative exergy demand analysis of the primary aluminum produced in China and its natural resource-saving potential in transportation. *Int J Life Cycle Assess* 20:1048–1060. doi: 10.1007/s11367-014-0828-9
- Sun X, Liu J, Hong J, Lu B (2016) Life cycle assessment of Chinese radial passenger vehicle tire. *Int J Life Cycle Assess* 21:1749–1758. doi: 10.1007/s11367-016-1139-0
- Sun X, Liu J, Lu B, Zhang P, Zhao M (2017) Life cycle assessment-based selection of a sustainable lightweight automotive engine hood design. *Int J Life Cycle Assess* 22:1373–1383. doi: 10.1007/s11367-016-1254-y
- Tagliaferri C, Clift R, Lettieri P, Chapman C (2017) Liquefied natural gas for the UK: a life cycle assessment. *Int J Life Cycle Assess* 22:1944–1956. doi: 10.1007/s11367-017-1285-z
- Takuma Y, Sugimori H, Ando E, Mizumoto K, Tahara K (2018) Comparison of the environmental impact of the conventional nickel electroplating and the new nickel electroplating. *Int J Life Cycle Assess* 23:1609–1623. doi: 10.1007/s11367-017-1375-y

- Timmis AJ, Hodzic A, Koh L, Bonner M, Soutis C, Schäfer AW, Dray L (2015) Environmental impact assessment of aviation emission reduction through the implementation of composite materials. *Int J Life Cycle Assess* 20:233–243. doi: 10.1007/s11367-014-0824-0
- Traverso M, Bell L, Saling P, Fontes J (2018) Towards social life cycle assessment: a quantitative product social impact assessment. *Int J Life Cycle Assess* 23:597–606. doi: 10.1007/s11367-016-1168-8
- Tyszler M, Kramer G, Blonk H (2014) Comparing apples with oranges: On the functional equivalence of food products for comparative LCAs. *Int J Life Cycle Assess* 19:1482–1487. doi: 10.1007/s11367-014-0762-x
- Unger SR, Landis AE (2014) Comparative life cycle assessment of reused versus disposable dental burs. *Int J Life Cycle Assess* 19:1623–1631. doi: 10.1007/s11367-014-0769-3
- Van Kernebeek HRJ, Oosting SJ, Van Ittersum MK, Bikker P, De Boer IJM (2016) Saving land to feed a growing population: consequences for consumption of crop and livestock products. *Int J Life Cycle Assess* 21:677–687. doi: 10.1007/s11367-015-0923-6
- Vogtländer JG, Van Der Velden NM, Van Der Lugt P (2014) Carbon sequestration in LCA, a proposal for a new approach based on the global carbon cycle; Cases on wood and on bamboo. *Int J Life Cycle Assess* 19:13–23. doi: 10.1007/s11367-013-0629-6
- Wang SW, Hsu CW, Hu AH (2017) An analytical framework for social life cycle impact assessment—part 2: case study of labor impacts in an IC packaging company. *Int J Life Cycle Assess* 22:784–797. doi: 10.1007/s11367-016-1185-7
- Wangel A (2018) Back to basics—the school lunch. *Int J Life Cycle Assess* 23:683–689. doi: 10.1007/s11367-016-1110-0
- Westfall LA, Davourie J, Ali M, McGough D (2016) Cradle-to-gate life cycle assessment of global manganese alloy production. *Int J Life Cycle Assess* 21:1573–1579. doi: 10.1007/s11367-015-0995-3
- Willers CD, Maranduba HL, de Almeida Neto JA, Rodrigues LB (2017) Environmental Impact assessment of a semi-intensive beef cattle production in Brazil’s Northeast. *Int J Life Cycle Assess* 22:516–524. doi: 10.1007/s11367-016-1062-4
- Xará S, Almeida MF, Costa C (2014) Life cycle assessment of alternatives for recycling abroad alkaline batteries from Portugal. *Int J Life Cycle Assess* 19:1382–1408. doi: 10.1007/s11367-014-0746-x
- Yazdanbakhsh A, Bank LC, Baez T, Wernick I (2018) Comparative LCA of concrete with natural and recycled coarse aggregate in the New York City area. *Int J Life Cycle Assess* 23:1163–1173. doi: 10.1007/s11367-017-1360-5
- Yuan Y, Guo M (2017) Do green wooden composites using lignin-based binder have environmentally benign alternatives? A preliminary LCA case study in China. *Int J Life Cycle Assess* 22:1318–1326. doi: 10.1007/s11367-016-1235-1
- Zamani B, Sandin G, Svanström M, Peters GM (2018) Hotspot identification in the clothing industry using social life cycle assessment—opportunities and challenges of input-output modelling. *Int J Life Cycle Assess* 23:536–546. doi: 10.1007/s11367-016-1113-x
- Zampori L, Dotelli G (2014) Design of a sustainable packaging in the food sector by applying LCA. *Int J Life Cycle Assess* 19:206–217. doi: 10.1007/s11367-013-0618-9
- Zhang J, Cheng JCP, Lo IMC (2014a) Life cycle carbon footprint measurement of Portland cement and ready mix concrete for a city with local scarcity of resources like Hong Kong. *Int J Life Cycle Assess* 19:745–757. doi: 10.1007/s11367-013-0689-7
- Zhang Y, Hu G, Brown RC (2014b) Life cycle assessment of commodity chemical production from forest residue via fast pyrolysis. *Int J Life Cycle Assess* 19:1371–1381. doi: 10.1007/s11367-014-0745-y
- Zhang Y, Jiang H, Li J, Shao S, Hou H, Qi Y, Zhang S (2018) Life cycle assessment and optimization analysis of different LNG usage scenarios. *Int J Life Cycle Assess* 23:1218–1227. doi: 10.1007/s11367-017-1347-2

## **1.2 Consequential life cycle assessment studies**

### **1.2.1 Uncertainty analysis performed**

#### **1.2.1a Monte Carlo-like approaches**

- Ponsioen TC, Vieira MDM, Goedkoop MJ (2014) Surplus cost as a life cycle impact indicator for fossil resource scarcity. *Int J Life Cycle Assess* 19:872–881. doi: 10.1007/s11367-013-0676-z

### **1.2.1b Probabilistic (other than Monte Carlo)**

None.

### **1.2.1c Taylor series**

None.

### **1.2.1d Scenario analysis**

Alvarez-Gaitan JP, Short MD, Peters GM, et al (2014) Consequential cradle-to-gate carbon footprint of water treatment chemicals using simple and complex marginal technologies for electricity supply. *Int J Life Cycle Assess* 19:1974–1984 . doi: 10.1007/s11367-014-0799-x

### **1.2.1e Qualitative/pedigree**

None.

### **1.2.1f Sensitivity analysis**

Höglmeier K, Weber-Blaschke G, Richter K (2014) Utilization of recovered wood in cascades versus utilization of primary wood—a comparison with life cycle assessment using system expansion. *Int J Life Cycle Assess* 19:1755–1766 . doi: 10.1007/s11367-014-0774-6

### **1.2.1g Fuzzy logic**

None.

### **1.2.1h Bayesian**

None.

### **1.2.1i Regression**

None.

### **1.2.1j Not indicated/other**

None.

### **1.2.2 Uncertainty analysis reported as not performed**

None.

### **1.2.3 Uncertainty mentioned but no analysis performed**

Buyle M, Pizzol M, Audenaert A (2018) Identifying marginal suppliers of construction materials: consistent modeling and sensitivity analysis on a Belgian case. *Int J Life Cycle Assess* 23:1624–1640. doi: 10.1007/s11367-017-1389-5

Chalmers NG, Brander M, Revoredo-Giha C (2015) The implications of empirical and 1:1 substitution ratios for consequential LCA: using a 1 % tax on whole milk as an illustrative example. *Int J Life Cycle Assess* 20:1268–1276. doi: 10.1007/s11367-015-0939-y

De Rosa M, Pizzol M, Schmidt J (2018) How methodological choices affect LCA climate impact results: the case of structural timber. *Int J Life Cycle Assess* 23:147–158. doi: 10.1007/s11367-017-1312-0

Muñoz I, Rodríguez C, Gillet D, Moerschbacher B (2018) Life cycle assessment of chitosan production in India and Europe. *Int J Life Cycle Assess* 23:1151–1160. doi: 10.1007/s11367-017-1290-2

Tsiropoulos I, Faaij APC, Seabra JEA, Lundquist L, Schenker U, Briois J-F, Patel MK (2014) Life cycle assessment of sugarcane ethanol production in India in comparison to Brazil. *Int J Life Cycle Assess* 19:1049–1067. doi: 10.1007/s11367-014-0714-5

- Ukaew S, Beck E, Archer DW, Shonnard DR (2015) Estimation of soil carbon change from rotation cropping of rapeseed with wheat in the hydrotreated renewable jet life cycle. *Int J Life Cycle Assess* 20:608–622. doi: 10.1007/s11367-015-0863-1
- Van Zanten HHE, Mollenhorst H, de Vries JW, van Middelaar CE, van Kernebeek HRL, de Boer IJM (2014) Assessing environmental consequences of using co-products in animal feed. *Int J Life Cycle Assess* 19:79–88. doi: 10.1007/s11367-013-0633-x
- Yang Y, Suh S (2015) Marginal yield, technological advances, and emissions timing in corn ethanol's carbon payback time. *Int J Life Cycle Assess* 20:226–232. doi: 10.1007/s11367-014-0827-x
- Zink T, Maker F, Geyer R, Amirtharajah R, Akella V (2014) Comparative life cycle assessment of smartphone reuse: Repurposing vs. refurbishment. *Int J Life Cycle Assess* 19:1099–1109. doi: 10.1007/s11367-014-0720-7

#### **1.2.4 No mention of uncertainty**

- de Marco I, Iannone R, Miranda S, Riemma S (2018) An environmental study on starch aerogel for drug delivery applications: effect of plant scale-up. *Int J Life Cycle Assess* 23:1228–1239. doi: 10.1007/s11367-017-1351-6
- Hicks AL, Theis TL (2014) An agent based approach to the potential for rebound resulting from evolution of residential lighting technologies. *Int J Life Cycle Assess* 19:370–376. doi: 10.1007/s11367-013-0643-8
- Kirschbaum MUF (2017) Assessing the merits of bioenergy by estimating marginal climate-change impacts. *Int J Life Cycle Assess* 22:841–852. doi: 10.1007/s11367-016-1196-4
- Tehrani Nejad M. A, Saint-Antonin V (2014) Factors driving refinery CO<sub>2</sub> intensity, with allocation into products: Comment. *Int J Life Cycle Assess* 19:24–28. doi: 10.1007/s11367-013-0634-9

### **1.3 Combination attributional and consequential life cycle assessment studies**

#### **1.3.1 Uncertainty analysis performed**

##### **1.3.1a Monte Carlo-like approaches**

- Roux C, Schalbart P, Peuportier B (2017) Development of an electricity system model allowing dynamic and marginal approaches in LCA—tested in the French context of space heating in buildings. *Int J Life Cycle Assess* 22:1177–1190 . doi: 10.1007/s11367-016-1229-z

##### **1.3.1b Probabilistic (other than Monte Carlo)**

None.

##### **1.3.1c Taylor series**

None.

##### **1.3.1d Scenario analysis**

- Sandin G, Peters GM, Svanström M (2014) Life cycle assessment of construction materials: The influence of assumptions in end-of-life modelling. *Int J Life Cycle Assess* 19:723–731 . doi: 10.1007/s11367-013-0686-x

##### **1.3.1e Qualitative/pedigree**

None.

##### **1.3.1f Sensitivity analysis**

None.

##### **1.3.1g Fuzzy logic**

None.

##### **1.3.1h Bayesian**



None.

### **1.3.1i Regression**

None.

### **1.3.1j Not indicated/other**

Cao V, Margni M, Favis BD, Deschênes L (2017) Choice of land reference situation in life cycle impact assessment. *Int J Life Cycle Assess* 22:1220–1231 . doi: 10.1007/s11367-016-1242-2

### **1.3.2 Uncertainty analysis reported as not performed**

None.

### **1.3.3 Uncertainty mentioned but no analysis performed**

Karka P, Papadokonstantakis S, Kokossis A (2017) Cradle-to-gate assessment of environmental impacts for a broad set of biomass-to-product process chains. *Int J Life Cycle Assess* 22:1418–1440. doi: 10.1007/s11367-017-1262-6

van Zanten HHE, Bikker P, Meerburg BG, de Boer IJM (2018) Attributional versus consequential life cycle assessment and feed optimization: alternative protein sources in pig diets. *Int J Life Cycle Assess* 23:1–11. doi: 10.1007/s11367-017-1299-6

### **1.3.4 No mention of uncertainty**

Moore CCS, Nogueira AR, Kulay L (2017) Environmental and energy assessment of the substitution of chemical fertilizers for industrial wastes of ethanol production in sugarcane cultivation in Brazil. *Int J Life Cycle Assess* 22:628–643. doi: 10.1007/s11367-016-1074-0

Prapasongsa T, Gheewala SH (2017) Consequential and attributional environmental assessment of biofuels: implications of modelling choices on climate change mitigation strategies. *Int J Life Cycle Assess* 22:1644–1657. doi: 10.1007/s11367-017-1355-2

Wiedemann SG, Ledgard SF, Henry BK, Yan M-J, Mao N, Russel SJ (2015) Application of life cycle assessment to sheep production systems: investigating co-production of wool and meat using case studies from major global producers. *Int J Life Cycle Assess* 20:463–476. doi: 10.1007/s11367-015-0849-z

## **1.4 Non-LCA studies (reviews, methodology, etc.)**

### **1.4.1 Uncertainty analysis performed/discussed**

#### **1.4.1a Monte Carlo-like approaches**

Benini L, Sala S (2016) Uncertainty and sensitivity analysis of normalization factors to methodological assumptions. *Int J Life Cycle Assess* 21:224–236 . doi: 10.1007/s11367-015-1013-5

Bisinella V, Conradsen K, Christensen TH, Astrup TF (2016) A global approach for sparse representation of uncertainty in Life Cycle Assessments of waste management systems. *Int J Life Cycle Assess* 21:378–394 . doi: 10.1007/s11367-015-1014-4

Groen EA, Bokkers EAM, Heijungs R, de Boer IJM (2017) Methods for global sensitivity analysis in life cycle assessment. *Int J Life Cycle Assess* 22:1125–1137 . doi: 10.1007/s11367-016-1217-3

Heijungs R, Henriksson PJG, Guinée JB (2017) Pre-calculated LCI systems with uncertainties cannot be used in comparative LCA. *Int J Life Cycle Assess* 22:461 . doi: 10.1007/s11367-017-1265-3

Heijungs R, Lenzen M (2014) Error propagation methods for LCA - A comparison. *Int J Life Cycle Assess* 19:1445–1461 . doi: 10.1007/s11367-014-0751-0

Herrmann IT, Lundberg-Jensen M, Jørgensen A, et al (2014) Enabling optimization in LCA: From “ad hoc” to “structural” LCA approach - Based on a biodiesel well-to-wheel case study. *Int J Life Cycle Assess* 19:194–205 . doi: 10.1007/s11367-013-0615-z

Mendoza Beltran A, Heijungs R, Guinée J, Tukker A (2016) A pseudo-statistical approach to treat choice uncertainty: the example of partitioning allocation methods. *Int J Life Cycle Assess* 21:252–264 . doi: 10.1007/s11367-015-0994-4

- Núñez M, Pfister S, Vargas M, Antón A (2015) Spatial and temporal specific characterisation factors for water use impact assessment in Spain. *Int J Life Cycle Assess* 20:128–138 . doi: 10.1007/s11367-014-0803-5
- Qin Y, Suh S (2017) What distribution function do life cycle inventories follow? *Int J Life Cycle Assess* 22:1138–1145 . doi: 10.1007/s11367-016-1224-4
- Tang L, Nakajima K, Murakami S, et al (2016) Estimating land transformation area caused by nickel mining considering regional variation. *Int J Life Cycle Assess* 21:51–59 . doi: 10.1007/s11367-015-0987-3
- Wender BA, Prado V, Fantke P, et al (2018) Sensitivity-based research prioritization through stochastic characterization modeling. *Int J Life Cycle Assess* 23:324–332 . doi: 10.1007/s11367-017-1322-y

#### **1.4.1b Probabilistic (other than Monte Carlo)**

- Boulay A-M, Motoshita M, Pfister S, et al (2015) Analysis of water use impact assessment methods (part A): evaluation of modeling choices based on a quantitative comparison of scarcity and human health indicators. *Int J Life Cycle Assess* 20:139–160 . doi: 10.1007/s11367-014-0814-2
- Ciroth A, Muller S, Weidema B, Lesage P (2016) Empirically based uncertainty factors for the pedigree matrix in ecoinvent. *Int J Life Cycle Assess* 21:1338–1348 . doi: 10.1007/s11367-013-0670-5
- Deng Y, Li J, Qiu M, et al (2017) Deriving characterization factors on freshwater ecotoxicity of graphene oxide nanomaterial for life cycle impact assessment. *Int J Life Cycle Assess* 22:222–236 . doi: 10.1007/s11367-016-1151-4
- Henriksson PJG, Guinée JB, Heijungs R, et al (2014) A protocol for horizontal averaging of unit process data - Including estimates for uncertainty. *Int J Life Cycle Assess* 19:429–436 . doi: 10.1007/s11367-013-0647-4
- Muller S, Lesage P, Giroth A, et al (2016) The application of the pedigree approach to the distributions foreseen in ecoinvent v3. *Int J Life Cycle Assess* 21:1327–1337 . doi: 10.1007/s11367-014-0759-5
- Pahri SDR, Mohamed AF, Samat A (2015) LCA for open systems: a review of the influence of natural and anthropogenic factors on aquaculture systems. *Int J Life Cycle Assess* 20:1324–1337 . doi: 10.1007/s11367-015-0929-0
- Passer A, Wall J, Kreiner H, et al (2015) Sustainable buildings, construction products and technologies: linking research and construction practice. *Int J Life Cycle Assess* 20:1–8 . doi: 10.1007/s11367-014-0820-4
- Scope C, Ilg P, Muench S, Guenther E (2016) Uncertainty in life cycle costing for long-range infrastructure. Part II: guidance and suitability of applied methods to address uncertainty. *Int J Life Cycle Assess* 21:1170–1184 . doi: 10.1007/s11367-016-1086-9

#### **1.4.1c Taylor series**

- Heijungs R, Lenzen M (2014) Error propagation methods for LCA - A comparison. *Int J Life Cycle Assess* 19:1445–1461 . doi: 10.1007/s11367-014-0751-0
- Jung J, Von Der Assen N, Bardow A (2014) Sensitivity coefficient-based uncertainty analysis for multi-functionality in LCA. *Int J Life Cycle Assess* 19:661–676 . doi: 10.1007/s11367-013-0655-4
- Torres CM, Antón A, Ferrer F, Castells F (2017) Greenhouse gas calculator at farm level addressed to the growers. *Int J Life Cycle Assess* 22:537–545 . doi: 10.1007/s11367-016-1068-y

#### **1.4.1d Scenario analysis**

- Weidema BP (2017) Estimation of the size of error introduced into consequential models by using attributional background datasets. *Int J Life Cycle Assess* 22:1241–1246 . doi: 10.1007/s11367-016-1239-x

#### **1.4.1e Qualitative/pedigree**

None.

#### **1.4.1f Sensitivity analysis**

- Cosme N, Hauschild MZ (2017) Characterization of waterborne nitrogen emissions for marine eutrophication modelling in life cycle impact assessment at the damage level and global scale. *Int J Life Cycle Assess* 22:1558–1570 . doi: 10.1007/s11367-017-1271-5

- Scherer L, Pfister S (2015) Modelling spatially explicit impacts from phosphorus emissions in agriculture. *Int J Life Cycle Assess* 20:785–795 . doi: 10.1007/s11367-015-0880-0
- Sweeney Smith S, Calbry-Muzyka A, Brandt AR (2016) Improved exergetic life cycle assessment through matrix reduction technique. *Int J Life Cycle Assess* 21:1379–1390 . doi: 10.1007/s11367-016-1118-5

#### **1.4.1g Fuzzy logic**

- Gavankar S, Suh S (2014) Fusion of conflicting information for improving representativeness of data used in LCAs. *Int J Life Cycle Assess* 19:480–490 . doi: 10.1007/s11367-013-0673-2
- Ren J, Manzardo A, Mazzi A, et al (2015) Prioritization of bioethanol production pathways in China based on life cycle sustainability assessment and multicriteria decision-making. *Int J Life Cycle Assess* 20:842–853 . doi: 10.1007/s11367-015-0877-8
- Vadenbo C, Rørbech J, Haupt M, Frischknecht R (2014) Abiotic resources: new impact assessment approaches in view of resource efficiency and resource criticality—55th Discussion Forum on Life Cycle Assessment, Zurich, Switzerland, April 11, 2014. *Int J Life Cycle Assess* 19:1686–1692 . doi: 10.1007/s11367-014-0784-4

#### **1.4.1h Bayesian**

- Muller S, Lesage P, Samson R (2016) Giving a scientific basis for uncertainty factors used in global life cycle inventory databases: an algorithm to update factors using new information. *Int J Life Cycle Assess* 21:1185–1196 . doi: 10.1007/s11367-016-1098-5

#### **1.4.1i Regression**

None.

#### **1.4.1j Not indicated/other**

- Déchaux C, Nitschelm L, Giard L, et al (2017) Development of the regionalised municipal solid waste incineration (RMWI) model and its application to France. *Int J Life Cycle Assess* 22:1514–1542 . doi: 10.1007/s11367-017-1268-0
- Fantke P, Jolliet O, Evans JS, et al (2015) Health effects of fine particulate matter in life cycle impact assessment: findings from the Basel Guidance Workshop. *Int J Life Cycle Assess* 20:276–288 . doi: 10.1007/s11367-014-0822-2
- Manfredi S, Allacker K, Pelletier N, et al (2015) Comparing the European Commission product environmental footprint method with other environmental accounting methods. *Int J Life Cycle Assess* 20:389–404 . doi: 10.1007/s11367-014-0839-6
- Masanet E, Chang Y, Yao Y, et al (2014) Reflections on a massive open online life cycle assessment course. *Int J Life Cycle Assess* 19:1901–1907 . doi: 10.1007/s11367-014-0800-8
- McManus MC, Taylor CM, Mohr A, et al (2015) Challenge clusters facing LCA in environmental decision-making—what we can learn from biofuels. *Int J Life Cycle Assess* 20:1399–1414 . doi: 10.1007/s11367-015-0930-7
- Muñoz I, Schmidt JH (2016) Methane oxidation, biogenic carbon, and the IPCC's emission metrics. Proposal for a consistent greenhouse-gas accounting. *Int J Life Cycle Assess* 21:1069–1075 . doi: 10.1007/s11367-016-1091-z
- Nordelöf A, Messagié M, Tillman AM, et al (2014) Environmental impacts of hybrid, plug-in hybrid, and battery electric vehicles—what can we learn from life cycle assessment? *Int J Life Cycle Assess* 19:1866–1890 . doi: 10.1007/s11367-014-0788-0
- Ojala E, Uusitalo V, Virkki-Hatakka T, et al (2016) Assessing product environmental performance with PEF methodology: reliability, comparability, and cost concerns. *Int J Life Cycle Assess* 21:1092–1105 . doi: 10.1007/s11367-016-1090-0
- Pelletier N, Allacker K, Pant R, Manfredi S (2014) The European Commission Organisation Environmental Footprint method: Comparison with other methods, and rationales for key requirements. *Int J Life Cycle Assess* 19:387–404 . doi: 10.1007/s11367-013-0609-x

- Pfister S, Vionnet S, Levova T, Humbert S (2016) Ecoinvent 3: assessing water use in LCA and facilitating water footprinting. *Int J Life Cycle Assess* 21:1349–1360 . doi: 10.1007/s11367-015-0937-0
- Plevin RJ, Delucchi MA, Creutzig F (2014) Response to “On the uncanny capabilities of consequential LCA” by Sangwon Suh and Yi Yang (*Int J Life Cycle Assess*, doi: 10.1007/s11367-014-0739-9) Richard. *Int J Life Cycle Assess* 19:1559–1560 . doi: 10.1007/s11367-014-0766-6
- Treyer K, Bauer C (2016) Life cycle inventories of electricity generation and power supply in version 3 of the ecoinvent database—part I: electricity generation. *Int J Life Cycle Assess* 21:1236–1254 . doi: 10.1007/s11367-013-0665-2
- Verones F, Pfister S, van Zelm R, Hellweg S (2017) Biodiversity impacts from water consumption on a global scale for use in life cycle assessment. *Int J Life Cycle Assess* 22:1247–1256 . doi: 10.1007/s11367-016-1236-0
- Wang R, Work D (2014) Application of robust optimization in matrix-based LCI for decision making under uncertainty. *Int J Life Cycle Assess* 19:1110–1118 . doi: 10.1007/s11367-013-0685-y
- Wu SR, Chen J, Apul D, et al (2015) Causality in social life cycle impact assessment (SLCIA). *Int J Life Cycle Assess* 20:1312–1323 . doi: 10.1007/s11367-015-0915-6

#### **1.4.2 Uncertainty analysis reported as not performed**

- Boulay AM, Bare J, Benini L, et al (2018) The WULCA consensus characterization model for water scarcity footprints: assessing impacts of water consumption based on available water remaining (AWARE). *Int J Life Cycle Assess* 23:368–378. doi: 10.1007/s11367-017-1333-8
- Hischier R (2014) Framework for LCI modelling of releases of manufactured nanomaterials along their life cycle. *Int J Life Cycle Assess* 19:838–849. doi: 10.1007/s11367-013-0688-8
- Rossi V, Lehesvirta T, Schenker U, Lundquist L, Koski O, Gueye S, Taylor R, Humbert S (2018) Capturing the potential biodiversity effects of forestry practices in life cycle assessment. *Int J Life Cycle Assess* 23:1192–1200. doi: 10.1007/s11367-017-1352-5
- Willers CD, Rodrigues LB (2014) A critical evaluation of Brazilian life cycle assessment studies. *Int J Life Cycle Assess* 19:144–152. doi: 10.1007/s11367-013-0608-y

#### **1.4.3 Uncertainty mentioned but no analysis performed**

- Ali AAMM, Negm AM, Bady MF, Ibrahim MGE (2014) Moving towards an Egyptian national life cycle inventory database. *Int J Life Cycle Assess* 19:1551–1558. doi: 10.1007/s11367-014-0760-z
- Allacker K, Mathieux F, Pennington D, Pant R (2017) The search for an appropriate end-of-life formula for the purpose of the European Commission Environmental Footprint initiative. *Int J Life Cycle Assess* 22:1441–1458. doi: 10.1007/s11367-016-1244-0
- Andrae ASG (2015) Method based on market changes for improvement of comparative attributional life cycle assessments. *Int J Life Cycle Assess* 20:263–275. doi: 10.1007/s11367-014-0830-2
- Antón A, Torrellas M, Raya V, Montero JI (2014) Modelling the amount of materials to improve inventory datasets of greenhouse infrastructures. *Int J Life Cycle Assess* 19:29–41. doi: 10.1007/s11367-013-0607-z
- Arena AP, Piastrellini R, Barón GN, Civit BM (2017) YUPI@, a regional footprint calculator. *Int J Life Cycle Assess* 22:546–556. doi: 10.1007/s11367-016-1049-1
- Astudillo MF, Treyer K, Bauer C, Pineau P-O, Amor MB (2017) Life cycle inventories of electricity supply through the lens of data quality: exploring challenges and opportunities. *Int J Life Cycle Assess* 22:374–386. doi: 10.1007/s11367-016-1163-0
- Atmaca A (2016) Life-cycle assessment and cost analysis of residential buildings in South East of Turkey: part 2—a case study. *Int J Life Cycle Assess* 21:925–942. doi: 10.1007/s11367-016-1051-7
- Avadí A, Henriksson PJG, Vázquez-Rowe I, Ziegler F (2018) Towards improved practices in Life Cycle Assessment of seafood and other aquatic products. *Int J Life Cycle Assess* 23:979–981. doi: 10.1007/s11367-018-1454-8
- Bach V, Möller F, Finogenova N, Emara Y, Finkbeiner M (2016) Characterization model to assess ocean acidification within life cycle assessment. *Int J Life Cycle Assess* 21:1463–1472. doi: 10.1007/s11367-016-1121-x

- Bakas I, Hauschild MZ, Astrup TF, Rosenbaum RK (2015) Preparing the ground for an operational handling of long-term emissions in LCA. *Int J Life Cycle Assess* 20:1444–1455. doi: 10.1007/s11367-015-0941-4
- Balanay RM, Halog A (2017) Promoting life cycle thinking for sustainability in the mining sector of the Philippines. *Int J Life Cycle Assess* 22:1864–1874. doi: 10.1007/s11367-016-1105-x
- Beloin-Saint-Pierre D, Turner DA, Salieri B, Haarman A, Hischier R (2018) How suitable is LCA for nanotechnology assessment? Overview of current methodological pitfalls and potential solutions: 65th LCA Discussion Forum, Swiss Federal Institute of Technology, Zürich, May 24, 2017. *Int J Life Cycle Assess* 23:191–196. doi: 10.1007/s11367-017-1399-3
- Benoît Norris C (2014) Data for social LCA. *Int J Life Cycle Assess* 19:261–265. doi: 10.1007/s11367-013-0644-7
- Bjørn A, Hauschild MZ (2015) Introducing carrying capacity-based normalisation in LCA: framework and development of references at midpoint level. *Int J Life Cycle Assess* 20:1005–1018. doi: 10.1007/s11367-015-0899-2
- Boulay AM, Bare J, De Camillis C, et al (2015) Consensus building on the development of a stress-based indicator for LCA-based impact assessment of water consumption: outcome of the expert workshops. *Int J Life Cycle Assess* 20:577–583. doi: 10.1007/s11367-015-0869-8
- Collet P, Lardon L, Steyer JP, Hélias A (2014) How to take time into account in the inventory step: A selective introduction based on sensitivity analysis. *Int J Life Cycle Assess* 19:320–330. doi: 10.1007/s11367-013-0636-7
- Cosme N, Mayorga E, Hauschild MZ (2018) Spatially explicit fate factors of waterborne nitrogen emissions at the global scale. *Int J Life Cycle Assess* 23:2861–1296. doi: 10.1007/s11367-017-1349-0
- Curran MA (2016) Life cycle assessment in the agri-food sector: case studies, methodological issues, and best practices. *Int J Life Cycle Assess* 21:785–787. doi: 10.1007/s11367-015-0977-5
- Curran MA (2018) Michael Z. Hauschild, Ralph K. Rosenbaum, and Stig Irvin Olsen (eds): *Life Cycle Assessment — Theory and Practice*. *Int J Life Cycle Assess* 23:1517–1519.
- De Rosa M, Schmidt J, Brandão M, Pizzol M (2017) A flexible parametric model for a balanced account of forest carbon fluxes in LCA. *Int J Life Cycle Assess* 22:172–184. doi: 10.1007/s11367-016-1148-z
- Drielsma JA, Russell-Vaccari AJ, Drnek T, Brady T, Weihed P, Mistry M, Simbor LP (2016) Mineral resources in life cycle impact assessment—defining the path forward. *Int J Life Cycle Assess* 21:85–105. doi: 10.1007/s11367-015-0991-7
- Dubois-Iorgulescu A-M, Saraiva AKEB, Valle R, Rodrigues LM (2018) How to define the system in social life cycle assessments? A critical review of the state of the art and identification of needed developments. *Int J Life Cycle Assess* 23:507–518. doi: 10.1007/s11367-016-1181-y
- Dyckhoff H, Quandt A, Waletzke K (2015) Rationality of eco-efficiency methods: Is the BASF analysis dependent on irrelevant alternatives? *Int J Life Cycle Assess* 20:1557–1567. doi: 10.1007/s11367-015-0957-9
- Edelen A, Ingwersen WW (2018) The creation, management, and use of data quality information for life cycle assessment. *Int J Life Cycle Assess* 23:759–772. doi: 10.1007/s11367-017-1348-1
- Ekvall T, Azapagic A, Finnveden G, Rydberg T, Weidema BP, Zamagni A (2016) Attributional and consequential LCA in the ILCD handbook. *Int J Life Cycle Assess* 21:293–296. doi: 10.1007/s11367-015-1026-0
- Fehrenbach H, Grahl B, Giegrich J, Busch M (2015) Hemeroby as an impact category indicator for the integration of land use into life cycle (impact) assessment. *Int J Life Cycle Assess* 20:1511–1527. doi: 10.1007/s11367-015-0955-y
- Felix M (2016) Status update on LCA studies and networking in Tanzania. *Int J Life Cycle Assess* 21:1825–1830. doi: 10.1007/s11367-016-1195-5
- Finkbeiner M (2014) Product environmental footprint - Breakthrough or breakdown for policy implementation of life cycle assessment? *Int J Life Cycle Assess* 19:266–271. doi: 10.1007/s11367-013-0678-x
- Freidberg S (2018) From behind the curtain: talking about values in LCA. *Int J Life Cycle Assess* 23:1410–1414. doi: 10.1007/s11367-015-0879-6

- Frischknecht R, Bauer C, Bucher C, et al (2018a) LCA of key technologies for future electricity supply — 68th LCA forum , Swiss Federal Institute of Technology , Zurich , 16 April , 2018. *Int J Life Cycle Assess* 23:1716–1721. doi: <https://doi.org/10.1007/s11367-018-1496-y>
- Frischknecht R, Bauer C, Froemelt A, et al (2018b) LCA of mobility solutions: approaches and findings—66th LCA forum, Swiss Federal Institute of Technology, Zurich, 30 August, 2017. *Int J Life Cycle Assess* 23:381–386. doi: [10.1007/s11367-017-1429-1](https://doi.org/10.1007/s11367-017-1429-1)
- Frischknecht R, Benetto E, Dandres T, et al (2017) LCA and decision making: when and how to use consequential LCA; 62nd LCA forum, Swiss Federal Institute of Technology, Zürich, 9 September 2016. *Int J Life Cycle Assess* 22:296–301. doi: [10.1007/s11367-016-1248-9](https://doi.org/10.1007/s11367-016-1248-9)
- Frischknecht R, Fantke P, Tschümperlin L, et al (2016a) Global guidance on environmental life cycle impact assessment indicators: progress and case study. *Int J Life Cycle Assess* 21:429–442. doi: [10.1007/s11367-015-1025-1](https://doi.org/10.1007/s11367-015-1025-1)
- Frischknecht R, Stolz P, Tschümperlin L (2016b) National environmental footprints and planetary boundaries: from methodology to policy implementation 59th LCA forum, Swiss Federal Institute of Technology, Zürich, June 12, 2015. *Int J Life Cycle Assess* 21:601–605. doi: [10.1007/s11367-016-1053-5](https://doi.org/10.1007/s11367-016-1053-5)
- Gala AB, Raugei M, Fullana-i-Palmer P (2015) Introducing a new method for calculating the environmental credits of end-of-life material recovery in attributional LCA. *Int J Life Cycle Assess* 20:645–654. doi: [10.1007/s11367-015-0861-3](https://doi.org/10.1007/s11367-015-0861-3)
- Galatola M, Pant R (2014) Reply to the editorial “product environmental footprint - breakthrough or breakdown for policy implementation of life cycle assessment?” Written by Prof. Finkbeiner (*Int J Life Cycle Assess* 19(2):266-271). *Int J Life Cycle Assess* 19:1356–1360. doi: [10.1007/s11367-014-0740-3](https://doi.org/10.1007/s11367-014-0740-3)
- Gallagher J, Styles D, McNabola A, Williams AP (2015) Inventory compilation for renewable energy systems: the pitfalls of materiality thresholds and priority impact categories using hydropower case studies. *Int J Life Cycle Assess* 20:1701–1707. doi: [10.1007/s11367-015-0976-6](https://doi.org/10.1007/s11367-015-0976-6)
- Gibon T, Schaubroeck T (2017) Lifting the fog on characteristics and limitations of hybrid LCA—a reply to “Does hybrid LCA with a complete system boundary yield adequate results for product promotion?” by Yi Yang (*Int J Life Cycle Assess* 22(3):456–406, doi: [10.1007/s11367-016-1256-9](https://doi.org/10.1007/s11367-016-1256-9)). *Int J Life Cycle Assess* 22:1005–1008. doi: [10.1007/s11367-017-1291-1](https://doi.org/10.1007/s11367-017-1291-1)
- Gilmore KR (2016) Teaching life cycle assessment in environmental engineering: a disinfection case study for students. *Int J Life Cycle Assess* 21:1706–1718. doi: [10.1007/s11367-016-1138-1](https://doi.org/10.1007/s11367-016-1138-1)
- Grabowski A, Selke SEM, Auras R, Patel MK, Narayan R (2015) Life cycle inventory data quality issues for bioplastics feedstocks. *Int J Life Cycle Assess* 20:584–596. doi: [10.1007/s11367-015-0853-3](https://doi.org/10.1007/s11367-015-0853-3)
- Grant A, Ries R, Thompson C (2016a) Quantitative approaches in life cycle assessment—part 1—descriptive statistics and factor analysis. *Int J Life Cycle Assess* 21:903–911. doi: [10.1007/s11367-016-1099-4](https://doi.org/10.1007/s11367-016-1099-4)
- Grant A, Ries R, Thompson C (2016b) Quantitative approaches in life cycle assessment—part 2—multivariate correlation and regression analysis. *Int J Life Cycle Assess* 21:912–919. doi: [10.1007/s11367-015-0948-x](https://doi.org/10.1007/s11367-015-0948-x)
- Guinée JB, Cucurachi S, Henriksson PJG, Heijungs R (2018) Digesting the alphabet soup of LCA. *Int J Life Cycle Assess* 23:1507–1511. doi: [10.1007/s11367-018-1478-0](https://doi.org/10.1007/s11367-018-1478-0)
- Hall MR (2015) A transdisciplinary review of the role of economics in life cycle sustainability assessment. *Int J Life Cycle Assess* 20:1625–1639. doi: [10.1007/s11367-015-0970-z](https://doi.org/10.1007/s11367-015-0970-z)
- Haupt M, Zschokke M (2017) How can LCA support the circular economy?—63rd discussion forum on life cycle assessment, Zurich, Switzerland, November 30, 2016. *Int J Life Cycle Assess* 22:832–837. doi: [10.1007/s11367-017-1267-1](https://doi.org/10.1007/s11367-017-1267-1)
- Hauschild M (2014) Life cycle assessment handbook—a guide for environmentally sustainable products by Mary Ann Curran (ed), ISBN: 978-1-118-09972-8, 640 pp, 2012. *Int J Life Cycle Assess* 19:1367–1369. doi: [10.1007/s11367-014-0734-1](https://doi.org/10.1007/s11367-014-0734-1)
- Heimersson S, Svanström M, Laera G, Peters G (2016) Life cycle inventory practices for major nitrogen, phosphorus and carbon flows in wastewater and sludge management systems. *Int J Life Cycle Assess* 21:1197–1212. doi: [10.1007/s11367-016-1095-8](https://doi.org/10.1007/s11367-016-1095-8)
- Hellweg S, Zah R (2016) What is new at the data front? *Int J Life Cycle Assess* 21:1215–1217. doi: [10.1007/s11367-016-1126-5](https://doi.org/10.1007/s11367-016-1126-5)

- Henryson K, Hansson PA, Sundberg C (2018) Spatially differentiated midpoint indicator for marine eutrophication of waterborne emissions in Sweden. *Int J Life Cycle Assess* 23:70–81. doi: 10.1007/s11367-017-1298-7
- Hetherington AC, Borrion AL, Griffiths OG, McManus MC (2014) Use of LCA as a development tool within early research: Challenges and issues across different sectors. *Int J Life Cycle Assess* 19:130–143. doi: 10.1007/s11367-013-0627-8
- Hischier R (2014) Framework for LCI modelling of releases of manufactured nanomaterials along their life cycle. *Int J Life Cycle Assess* 19:838–849. doi: 10.1007/s11367-013-0688-8
- Hobson K, Lynch N (2018) Ecological modernization, techno-politics and social life cycle assessment: a view from human geography. *Int J Life Cycle Assess* 23:456–463. doi: 10.1007/s11367-015-1005-5
- Huijbregts M (2014) A critical view on scientific consensus building in life cycle impact assessment. *Int J Life Cycle Assess* 19:477–479. doi: 10.1007/s11367-013-0674-1
- Huijbregts MAJ, Steinmann ZJN, Elshout PMF, Stam G, Verones F, Vieira M, Zijp M, Hollander A, van Zelm R (2017) ReCiPe2016: a harmonised life cycle impact assessment method at midpoint and endpoint level. *Int J Life Cycle Assess* 22:138–147. doi: 10.1007/s11367-016-1246-y
- Hunkeler D (2017) Special Types of Life Cycle Assessment Editor: Matthias Finkbeiner. *LCA Compendium - The Complete World of Life Cycle Assessment (Book Series)* Series Editors: Walter Klöpffer and Mary Ann Curran. Book reviewer: David Hunkeler. *Int J Life Cycle Assess* 22:302–305. doi: 10.1007/s11367-016-1214-6
- Hunkeler D (2015) *LCA Compendium—The Complete World of Life Cycle Assessment (book series)* Series editors: Walter Klöpffer and Mary Ann Curran. Background and Future Prospects in Life Cycle Assessment Editor: Walter Klöpffer, LCA Consult & Review, Frankfurt am Main, Germany. *Int J Life Cycle Assess* 21:595–600. doi: 10.1007/s11367-016-1041-9
- Ilg P, Scope C, Muench S, Guenther E (2017) Uncertainty in life cycle costing for long-range infrastructure. Part I: leveling the playing field to address uncertainties. *Int J Life Cycle Assess* 22:277–292. doi: 10.1007/s11367-016-1154-1
- Ingwersen WW, Subramanian V (2014) Guidance for product category rule development: Process, outcome, and next steps. *Int J Life Cycle Assess* 19:532–537. doi: 10.1007/s11367-013-0659-0
- Jasiński D, Meredith J, Kirwan K (2018) The life cycle impact for platinum group metals and lithium to 2070 via surplus cost potential. *Int J Life Cycle Assess* 23:773–786. doi: 10.1007/s11367-017-1329-4
- Jorgensen S V., Hauschild MZ, Nielsen PH (2014) Assessment of urgent impacts of greenhouse gas emissions - the climate tipping potential (CTP). *Int J LCA* 19:919–930. doi: 10.1007/s11367-013-0693-y
- Joyce PJ, Goronovski A, Tkaczyk AH, Björklund A (2017) A framework for including enhanced exposure to naturally occurring radioactive materials (NORM) in LCA. *Int J Life Cycle Assess* 22:1078–1095. doi: 10.1007/s11367-016-1218-2
- Kägi T, Dinkel F, Frischknecht R, Humbert S, Lindberg J, De Mester S, Ponsioen T, Sala S, Schenker UW (2016) Session “Midpoint, endpoint or single score for decision-making?”—SETAC Europe 25th Annual Meeting, May 5th, 2015. *Int J Life Cycle Assess* 21:129–132. doi: 10.1007/s11367-015-0998-0
- Karlsson CSJ, Miliutenko S, Björklund A, Mörtberg U, Olofsson B, Toller S (2017) Life cycle assessment in road infrastructure planning using spatial geological data. *Int J Life Cycle Assess* 22:1302–1317. doi: 10.1007/s11367-016-1241-3
- Kim SJ, Kara S, Hauschild M (2017) Functional unit and product functionality—addressing increase in consumption and demand for functionality in sustainability assessment with LCA. *Int J Life Cycle Assess* 22:1257–1265. doi: 10.1007/s11367-016-1233-3
- Klein D, Wolf C, Schulz C, Weber-Blaschke G (2015) 20 years of life cycle assessment (LCA) in the forestry sector: state of the art and a methodical proposal for the LCA of forest production. *Int J Life Cycle Assess* 20:556–575. doi: 10.1007/s11367-015-0847-1
- Klinglmair M, Sala S, Brandão M (2014) Assessing resource depletion in LCA: A review of methods and methodological issues. *Int J Life Cycle Assess* 19:580–592. doi: 10.1007/s11367-013-0650-9

- Koffler C, Finkbeiner M (2018) Are we still keeping it “real”? Proposing a revised paradigm for recycling credits in attributional life cycle assessment. *Int J Life Cycle Assess* 23:181–190. doi: 10.1007/s11367-017-1404-x
- Koffler C, Shonfield P, Vickers J (2017) Beyond pedigree—optimizing and measuring representativeness in large-scale LCAs. *Int J Life Cycle Assess* 22:1065–1077. doi: 10.1007/s11367-016-1223-5
- Kuczynski B, Marvuglia A, Astudillo MF, Ingwersen WW, Satterfield MB, Evers DP, Koffler C, Navarrete T, Amor B, Laurin L (2018) LCA capability roadmap—product system model description and revision. *Int J Life Cycle Assess* 23:1685–1692. doi: 10.1007/s11367-018-1446-8
- Kulak M, Sim S, King H, Lam WY, Marquardt S, Huijbregts M (2018) Tracking current and forecasting future land-use impacts of agricultural value chains. 67th Discussion Forum on Life Cycle Assessment, 3rd of November 2017, Zurich, Switzerland. *Int J Life Cycle Assess* 23:1520–1524. doi: 10.1007/s11367-018-1441-0
- Langlois J, Fréon P, Steyer J-P, Delgenès J-P, Hélias A (2015) Sea use impact category in life cycle assessment: characterization factors for life support functions. *Int J Life Cycle Assess* 20:970–981. doi: 10.1007/s11367-015-0886-7
- Lasvaux S, Gantner J, Wittstock B, et al (2014a) Achieving consistency in life cycle assessment practice within the European construction sector: the role of the EeBGuide InfoHub. *Int J Life Cycle Assess* 19:1783–1793. doi: 10.1007/s11367-014-0786-2
- Lasvaux S, Ventura A, Habert G, De La Roche C, Kermel K, Feraille A, Tardivel Y, Tessier C (2014b) Linking research activities and their implementation in practice in the construction sector: The LCA Construction 2012 experience. *Int J Life Cycle Assess* 19:463–470. doi: 10.1007/s11367-013-0682-1
- Laurin L, Amor B, Bachmann TM, Bare J, Koffler C, Genest S, Preiss P, Pierce J, Satterfield B, Vigon B (2016) Life cycle assessment capacity roadmap (section 1): decision-making support using LCA. *Int J Life Cycle Assess* 21:443–447. doi: 10.1007/s11367-016-1031-y
- Lesage P, Samson R (2016) The Quebec Life Cycle Inventory Database Project: Using the ecoinvent database to generate, review, integrate, and host regional LCI data. *Int J Life Cycle Assess* 21:1282–1289. doi: 10.1007/s11367-013-0593-1
- Lewandowska A, Matuszak-Flejszman A (2014) Eco-design as a normative element of Environmental Management Systems—the context of the revised ISO 14001:2015. *Int J Life Cycle Assess* 19:1794–1798. doi: 10.1007/s11367-014-0787-1
- Macombe C, Loeillet D, Gillet C (2018) Extended community of peers and robustness of social LCA. *Int J Life Cycle Assess* 23:492–506. doi: 10.1007/s11367-016-1226-2
- Maia de Souza D, Braga T, Brito de Figueirêdo MC, Folegatti Matsuura MIS, Teixeira Dias FR, Ugraya CML (2017) Life cycle thinking in Brazil: challenges and advances towards a more comprehensive practice. *Int J Life Cycle Assess* 22:462–465. doi: 10.1007/s11367-016-1234-2
- Mancini L, Benini L, Sala S (2018) Characterization of raw materials based on supply risk indicators for Europe. *Int J Life Cycle Assess* 23:726–738. doi: 10.1007/s11367-016-1137-2
- Martínez-Blanco J, Forin S, Finkbeiner M (2018) Launch of a new report: “Road testing organizational life cycle assessment around the world: applications, experiences and lessons learned.” *Int J Life Cycle Assess* 23:159–163. doi: 10.1007/s11367-017-1409-5
- McCabe A, Halog A (2018) Exploring the potential of participatory systems thinking techniques in progressing SLCA. *Int J Life Cycle Assess* 23:739–750. doi: 10.1007/s11367-016-1143-4
- Meron N, Blass V, Garb Y, Kahane Y, Thoma G (2016) Why going beyond standard LCI databases is important: lessons from a meta-analysis of potable water supply system LCAs. *Int J Life Cycle Assess* 21:1134–1147. doi: 10.1007/s11367-016-1096-7
- Morais TG, Domingos T, Teixeira RFM (2016a) A spatially explicit life cycle assessment midpoint indicator for soil quality in the European Union using soil organic carbon. *Int J Life Cycle Assess* 21:1076–1091. doi: 10.1007/s11367-016-1077-x
- Morais TG, Teixeira RFM, Domingos T (2016b) Regionalization of agri-food life cycle assessment: a review of studies in Portugal and recommendations for the future. *Int J Life Cycle Assess* 21:875–884. doi: 10.1007/s11367-016-1055-3



- Moro A, Helmers E (2017) A new hybrid method for reducing the gap between WTW and LCA in the carbon footprint assessment of electric vehicles. *Int J Life Cycle Assess* 22:4–14. doi: 10.1007/s11367-015-0954-z
- Nakano K (2015) Life-cycle assessment framework for adaptation planning to climate change: linking regional climate impact with product design. *Int J Life Cycle Assess* 20:819–828. doi: 10.1007/s11367-015-0867-x
- Nemecek T, Jungbluth N, i Canals LM, Schenck R (2016a) Environmental impacts of food consumption and nutrition: where are we and what is next? *Int J Life Cycle Assess* 21:607–620. doi: 10.1007/s11367-016-1071-3
- Nemecek T, Schnetzer J, Reinhard J (2016b) Updated and harmonised greenhouse gas emissions for crop inventories. *Int J Life Cycle Assess* 21:1361–1378. doi: 10.1007/s11367-014-0712-7
- Nordelöf A, Tillman AM (2018) A scalable life cycle inventory of an electrical automotive traction machine—Part II: manufacturing processes. *Int J Life Cycle Assess* 23:295–313. doi: 10.1007/s11367-017-1309-8
- Núñez M, Bouchard CR, Bulle C, Boulay A-M, Margni M (2016) Critical analysis of life cycle impact assessment methods addressing consequences of freshwater use on ecosystems and recommendations for future method development. *Int J Life Cycle Assess* 21:1799–1815. doi: 10.1007/s11367-016-1127-4
- O’Keeffe S, Majer S, Bezama A, Thrän D (2016) When considering no man is an island—assessing bioenergy systems in a regional and LCA context: a review. *Int J Life Cycle Assess* 21:885–902. doi: 10.1007/s11367-016-1057-1
- O’Sullivan OS, Hopkinson L, Crockatt ME, Laird P, Bebbler DP (2016) Stable forest carbon stocks support current assumption of biogenic carbon neutrality in the case of European-manufactured beverage cartons. *Int J Life Cycle Assess* 21:118–128. doi: 10.1007/s11367-015-0989-1
- Olinzock MA, Landis AE, Saunders CL, Collinge WO, Jones AK, Schaefer LA, Bilec MM (2015) Life cycle assessment use in the North American building community: summary of findings from a 2011/2012 survey. *Int J Life Cycle Assess* 20:318–331. doi: 10.1007/s11367-014-0834-y
- Owsianiak M, Laurent A, Bjørn A, Hauschild MZ (2014) IMPACT 2002+, ReCiPe 2008 and ILCD’s recommended practice for characterization modelling in life cycle impact assessment: A case study-based comparison. *Int J Life Cycle Assess* 19:1007–1021. doi: 10.1007/s11367-014-0708-3
- Payen S, Basset-Mens C, Núñez M, Follain S, Grünberger O, Marlet S, Perret S, Roux P (2016) Salinisation impacts in life cycle assessment: a review of challenges and options towards their consistent integration. *Int J Life Cycle Assess* 21:577–594. doi: 10.1007/s11367-016-1040-x
- Pelletier N, Ardente F, Brandão M, De Camillis C, Pennington D (2015) Rationales for and limitations of preferred solutions for multi-functionality problems in LCA: is increased consistency possible? *Int J Life Cycle Assess* 20:74–86. doi: 10.1007/s11367-014-0812-4
- Perrin A, Basset-Mens C, Gabrielle B (2014) Life cycle assessment of vegetable products: A review focusing on cropping systems diversity and the estimation of field emissions. *Int J Life Cycle Assess* 19:1247–1263. doi: 10.1007/s11367-014-0724-3
- Peter C, Fiore A, Hagemann U, Nendel C, Xiloyannis C (2016) Improving the accounting of field emissions in the carbon footprint of agricultural products: a comparison of default IPCC methods with readily available medium-effort modeling approaches. *Int J Life Cycle Assess* 21:791–805. doi: 10.1007/s11367-016-1056-2
- Pini M, Salieri B, Ferrari AM, Nowack B, Hischier R (2016) Human health characterization factors of nano-TiO<sub>2</sub> for indoor and outdoor environments. *Int J Life Cycle Assess* 21:1452–1462. doi: 10.1007/s11367-016-1115-8
- Pizzirani S, McLaren SJ, Seadon JK (2014) Is there a place for culture in life cycle sustainability assessment? *Int J Life Cycle Assess* 19:1316–1330. doi: 10.1007/s11367-014-0722-5
- Pizzol M, Laurent A, Sala S, Weidema B, Verones F, Koffler C (2017) Normalisation and weighting in life cycle assessment: *quo vadis?* *Int J Life Cycle Assess* 22:853–866. doi: 10.1007/s11367-016-1199-1
- Pizzol M, Scotti M (2017) Identifying marginal supplying countries of wood products via trade network analysis. *Int J Life Cycle Assess* 22:1146–1158. doi: 10.1007/s11367-016-1222-6

- Plouffe G, Bulle C, Deschênes L (2016) Characterization factors for zinc terrestrial ecotoxicity including speciation. *Int J Life Cycle Assess* 21:523–535. doi: 10.1007/s11367-016-1037-5
- Plouffe G, Bulle C, Deschênes L (2015) Assessing the variability of the bioavailable fraction of zinc at the global scale using geochemical modeling and soil archetypes. *Int J Life Cycle Assess* 20:527–540. doi: 10.1007/s11367-014-0841-z
- Poolsawad N, Thanungkano W, Mungkalasiri J, Wisansuwannakorn R, Suksatit P, Jirajariyavech A, Datchaneekul K (2017) Thai national life cycle inventory readiness for product environmental footprint. *Int J Life Cycle Assess* 22:1731–1743. doi: 10.1007/s11367-016-1257-8
- Potting J, Finnveden G (2015) *LCA Compendium—The Complete World of Life Cycle Assessment* (book series) Series editors: Walter Klöpffer and Mary Ann Curran. Life Cycle Impact Assessment Editors: Michael Z. Hauschild and Mark A. J. Huijbregts. *Int J Life Cycle Assess* 21:595–600. doi: 10.1007/s11367-016-1041-9
- Prado V, Wender BA, Seager TP (2017) Interpretation of comparative LCAs: external normalization and a method of mutual differences. *Int J Life Cycle Assess* 22:2018–2029. doi: 10.1007/s11367-017-1281-3
- Pulkkinen H, Roininen T, Katajajuuri JM, Järvinen M (2016) Development of a Climate Choice meal concept for restaurants based on carbon footprinting. *Int J Life Cycle Assess* 21:621–630. doi: 10.1007/s11367-015-0913-8
- Quinteiro P, Dias AC, Araújo A, Pestana JLT, Ridoutt BG, Arroja L (2015) Suspended solids in freshwater systems: characterisation model describing potential impacts on aquatic biota. *Int J Life Cycle Assess* 20:1232–1242. doi: 10.1007/s11367-015-0916-5
- Quinteiro P, Ridoutt BG, Arroja L, Dias AC (2018) Identification of methodological challenges remaining in the assessment of a water scarcity footprint: a review. *Int J Life Cycle Assess* 23:164–180. doi: 10.1007/s11367-017-1304-0
- Reale F, Cinelli M, Sala S (2017) Towards a research agenda for the use of LCA in the impact assessment of policies. *Int J Life Cycle Assess* 22:1477–1481. doi: 10.1007/s11367-017-1320-0
- Ren J, Ren X, Liang H, Dong L, Zhang L, Luo X, Yang Y, Gao Z (2017) Multi-actor multi-criteria sustainability assessment framework for energy and industrial systems in life cycle perspective under uncertainties. Part 1: weighting method. *Int J Life Cycle Assess* 22:1397–1405. doi: 10.1007/s11367-016-1251-1
- Rieckhof R, Guenther E (2018) Integrating life cycle assessment and material flow cost accounting to account for resource productivity and economic-environmental performance. *Int J Life Cycle Assess* 23:1491–1506. doi: 10.1007/s11367-018-1447-7
- Rönnlund I, Reuter M, Horn S, Aho J, Aho M, Päällysaho M, Ylimäki , Pursula T (2016) Eco-efficiency indicator framework implemented in the metallurgical industry: part 2—a case study from the copper industry. *Int J Life Cycle Assess* 21:1719–1748. doi: 10.1007/s11367-016-1123-8
- Roos S, Holmquist H, Jönsson C, Arvidsson R (2018) USEtox characterisation factors for textile chemicals based on a transparent data source selection strategy. *Int J Life Cycle Assess* 23:890–903. doi: 10.1007/s11367-017-1330-y
- Rosenbaum RK, Anton A, Bengoa X, et al (2015) The Glasgow consensus on the delineation between pesticide emission inventory and impact assessment for LCA. *Int J Life Cycle Assess* 20:765–776. doi: 10.1007/s11367-015-0871-1
- Sakellariou N (2018) A historical perspective on the engineering ideologies of sustainability: the case of SLCA. *Int J Life Cycle Assess* 23:445–455. doi: 10.1007/s11367-016-1167-9
- Sandin G, Peters GM, Svanström M (2015) Using the planetary boundaries framework for setting impact-reduction targets in LCA contexts. *Int J Life Cycle Assess* 20:1684–1700. doi: 10.1007/s11367-015-0984-6
- Santero N, Hendry J (2016) Harmonization of LCA methodologies for the metal and mining industry. *Int J Life Cycle Assess* 21:1543–1553. doi: 10.1007/s11367-015-1022-4
- Schneider L, Berger M, Finkbeiner M (2015) Abiotic resource depletion in LCA—background and update of the anthropogenic stock extended abiotic depletion potential (AADP) model. *Int J Life Cycle Assess* 20:709–721. doi: 10.1007/s11367-015-0864-0

- Schrijvers DL, Loubet P, Sonnemann G (2016) Developing a systematic framework for consistent allocation in LCA. *Int J Life Cycle Assess* 21:976–993. doi: 10.1007/s11367-016-1063-3
- Seidel C (2016) The application of life cycle assessment to public policy development. *Int J Life Cycle Assess* 21:337–348. doi: 10.1007/s11367-015-1024-2
- Silvestre JD, Lasvaux S, Hodková J, de Brito J, Pinheiro MD (2015) NativeLCA - a systematic approach for the selection of environmental datasets as generic data: application to construction products in a national context. *Int J Life Cycle Assess* 20:731–750. doi: 10.1007/s11367-015-0885-8
- Simons A (2016) Road transport: new life cycle inventories for fossil-fuelled passenger cars and non-exhaust emissions in ecoinvent v3. *Int J Life Cycle Assess* 21:1299–1313. doi: 10.1007/s11367-013-0642-9
- Soimakallio S, Cowie A, Brandão M, Finnveden G, Ekvall T, Erlandsson M, Koponen K, Karlsson P-E (2015) Attributional life cycle assessment: is a land-use baseline necessary? *Int J Life Cycle Assess* 20:1364–1375. doi: 10.1007/s11367-015-0947-y
- Sonderegger T, Dewulf J, Fantke P, Maia de Souza D, Pfister S, Stoessel F, Verones F, Vieira M, Weidema B, Hellweg S (2017) Towards harmonizing natural resources as an area of protection in life cycle impact assessment. *Int J Life Cycle Assess* 22:1912–1927. doi: 10.1007/s11367-017-1297-8
- Sousa-Zomer TT, Cauchick Miguel PA (2018) The main challenges for social life cycle assessment (SLCA) to support the social impacts analysis of product-service systems. *Int J Life Cycle Assess* 23:607–616. doi: 10.1007/s11367-015-1010-8
- Steen B, Palander S (2016) A selection of safeguard subjects and state indicators for sustainability assessments. *Int J Life Cycle Assess* 21:861–874. doi: 10.1007/s11367-016-1052-6
- Steubing B, Mutel C, Suter F, Hellweg S (2016a) Streamlining scenario analysis and optimization of key choices in value chains using a modular LCA approach. *Int J Life Cycle Assess* 21:510–522. doi: 10.1007/s11367-015-1015-3
- Steubing B, Wernet G, Reinhard J, Bauer C, Moreno-Ruiz E (2016b) The ecoinvent database version 3 (part II): analyzing LCA results and comparison to version 2. *Int J Life Cycle Assess* 21:1269–1281. doi: 10.1007/s11367-016-1109-6
- Suckling J, Lee J (2015) Redefining scope: the true environmental impact of smartphones? *Int J Life Cycle Assess* 20:1181–1196. doi: 10.1007/s11367-015-0909-4
- Suh S, Leighton M, Tomar S, Chen C (2016) Interoperability between ecoinvent ver. 3 and US LCI database: a case study. *Int J Life Cycle Assess* 21:1290–1298. doi: 10.1007/s11367-013-0592-2
- Suh S, Qin Y (2017) Pre-calculated LCIs with uncertainties revisited. *Int J Life Cycle Assess* 22:827–831. doi: 10.1007/s11367-017-1287-x
- Suh S, Yang Y (2014) On the uncanny capabilities of consequential LCA. *Int J Life Cycle Assess* 19:1179–1184. doi: 10.1007/s11367-014-0739-9
- Taing E, Bulle C, Deschênes L (2015) Including organic mixture influence on dioxins and furans fate for toxic impact assessment in a life cycle context. *Int J Life Cycle Assess* 20:289–298. doi: 10.1007/s11367-014-0826-y
- Testa F, Nucci B, Tessitore S, Iraldo F, Daddi T (2016) Perceptions on LCA implementation: evidence from a survey on adopters and nonadopters in Italy. *Int J Life Cycle Assess* 21:1501–1513. doi: 10.1007/s11367-016-1106-9
- Tillotson MR, Liu J, Guan D, Wu P, Zhao X, Zhang G, Pfister S, Pahlow M (2014) Water Footprint Symposium: Where next for water footprint and water assessment methodology? *Int J Life Cycle Assess* 19:1561–1565. doi: 10.1007/s11367-014-0770-x
- Treyer K, Bauer C (2016) Life cycle inventories of electricity generation and power supply in version 3 of the ecoinvent database—part I: electricity generation. *Int J Life Cycle Assess* 21:1236–1254. doi: 10.1007/s11367-013-0665-2
- Trupia L, Parry T, Neves LC, Lo Presti D (2017) Rolling resistance contribution to a road pavement life cycle carbon footprint analysis. *Int J Life Cycle Assess* 22:972–985. doi: 10.1007/s11367-016-1203-9
- Valente A, Iribarren D, Dufour J (2017) Life cycle assessment of hydrogen energy systems: a review of methodological choices. *Int J Life Cycle Assess* 22:346–363. doi: 10.1007/s11367-016-1156-z

- van Dooren C, Aiking H, Vellinga P (2018) In search of indicators to assess the environmental impact of diets. *Int J Life Cycle Assess* 23:1297–1314. doi: 10.1007/s11367-017-1371-2
- van Haaster B, Citroth A, Fontes J, Wood R, Ramirez A (2017) Development of a methodological framework for social life-cycle assessment of novel technologies. *Int J Life Cycle Assess* 22:423–440. doi: 10.1007/s11367-016-1162-1
- Vandepaer L, Gibon T (2018) The integration of energy scenarios into LCA: LCM2017 Conference Workshop, Luxembourg, September 5, 2017. *Int J Life Cycle Assess* 23:970–977. doi: 10.1007/s11367-017-1435-3
- Vieira MDM, Huijbregts MAJ (2018) Comparing mineral and fossil surplus costs of renewable and non-renewable electricity production. *Int J Life Cycle Assess* 23:840–850. doi: 10.1007/s11367-017-1335-6
- Weymar E, Finkbeiner M (2016) Statistical analysis of empirical lifetime mileage data for automotive LCA. *Int J Life Cycle Assess* 21:215–223. doi: 10.1007/s11367-015-1020-6
- Yang Y (2017) Does hybrid LCA with a complete system boundary yield adequate results for product promotion? *Int J Life Cycle Assess* 22:456–460. doi: 10.1007/s11367-016-1256-9
- Yang Y (2015) A note on pesticide-related toxicity impacts of crops in the USA. *Int J Life Cycle Assess* 20:1604–1606. doi: 10.1021/es502497p
- Yang Y, Heijungs R (2018) On the use of different models for consequential life cycle assessment. *Int J Life Cycle Assess* 23:751–758. doi: 10.1007/s11367-017-1337-4
- Zimdars C, Haas A, Pfister S (2018) Enhancing comprehensive measurement of social impacts in S-LCA by including environmental and economic aspects. *Int J Life Cycle Assess* 23:133–146. doi: 10.1007/s11367-017-1305-z

#### **1.4.4 No mention of uncertainty**

- Arcese G, Lucchetti MC, Massa I, Valente C (2018) State of the art in S-LCA: integrating literature review and automatic text analysis. *Int J Life Cycle Assess* 23:394–405. doi: 10.1007/s11367-016-1082-0
- Arvidsson R, Baumann H, Hildenbrand J (2015) On the scientific justification of the use of working hours, child labour and property rights in social life cycle assessment: three topical reviews. *Int J Life Cycle Assess* 20:161–173. doi: 10.1007/s11367-014-0821-3
- Arvizu-Piña VA, Cuchi Burgos A (2017) Promoting sustainability in Mexico's building sector via environmental product declarations. *Int J Life Cycle Assess* 22:1744–1759. doi: 10.1007/s11367-017-1269-z
- Bach V, Finkbeiner M (2017) Approach to qualify decision support maturity of new versus established impact assessment methods—demonstrated for the categories acidification and eutrophication. *Int J Life Cycle Assess* 22:387–397. doi: 10.1007/s11367-016-1164-z
- Beloin-Saint-Pierre D, Heijungs R, Blanc I (2014) The ESPA (Enhanced Structural Path Analysis) method: A solution to an implementation challenge for dynamic life cycle assessment studies. *Int J Life Cycle Assess* 19:861–871. doi: 10.1007/s11367-014-0710-9
- Bodunrin MO, Burman NW, Croft J, Engelbrecht S, Goga T, Ladenika AO, MacGregor OS, Maepa M, Hadring KG (2018) The availability of life-cycle assessment, water footprinting, and carbon footprinting studies in Brazil. *Int J Life Cycle Assess* 23:1701–1707
- Brander M (2016) Conceptualizing attributional LCA is necessary for resolving methodological issues such as the appropriate form of land use baseline (*Int J Life Cycle Assess*, 10.1007/s11367-016-1147-0). *Int J Life Cycle Assess* 21:1816–1821. doi: 10.1007/s11367-016-1159-9
- Brander M (2015) Response to “Attributional life cycle assessment: is a land-use baseline necessary?”—appreciation, renouncement, and further discussion. *Int J Life Cycle Assess* 20:1607–1611. doi: 10.1007/s11367-015-0974-8
- Broadbent C (2016) Steel's recyclability: demonstrating the benefits of recycling steel to achieve a circular economy. *Int J Life Cycle Assess* 21:1658–1665. doi: 10.1007/s11367-016-1081-1
- Burman NW, Croft J, Engelbrecht S, Ladenika AO, MacGregor OS, Maepa M, Bodunrin MO, Harding KG (2018) Review: life-cycle assessment, water footprinting, and carbon footprinting in Portugal. *Int J Life Cycle Assess* 23:1693–1700. doi: 10.1007/s11367-018-1483-3
- Castellani V, Benini L, Sala S, Pant R (2016) A distance-to-target weighting method for Europe 2020. *Int J Life Cycle Assess* 21:1159–1169. doi: 10.1007/s11367-016-1079-8

- Chen H, Yang Y, Yang Y, Jiang W, Zhou J (2014) A bibliometric investigation of life cycle assessment research in the web of science databases. *Int J Life Cycle Assess* 19:1674–1685. doi: 10.1007/s11367-014-0777-3
- Chkanikova O, Kogg B (2018) Sustainability governance service providers: the role of third-party product certification in facilitating corporate life cycle management. *Int J Life Cycle Assess* 23:1383–1395. doi: 10.1007/s11367-015-0865-z
- Croes PR, Vermeulen WJV (2016) In search of income reference points for SLCA using a country level sustainability benchmark (part 1): fair inequality. A contribution to the Oiconomy project. *Int J Life Cycle Assess* 21:349–362. doi: 10.1007/s11367-015-1018-0
- Cruze NB, Goel PK, Bakshi BR (2014) Allocation in life cycle inventory: partial set of solutions to an ill-posed problem. *Int J Life Cycle Assess* 19:1854–1865. doi: 10.1007/s11367-014-0785-3
- Curran MA (2017) Letter to the editor by Prof. Reinout Heijungs. *Int J Life Cycle Assess* 22:1473–1474. doi: 10.1007/s11367-017-1359-y
- Curran MA, Young SB (2014) Critical review: a summary of the current state-of-practice. *Int J Life Cycle Assess* 19:1667–1673. doi: 10.1007/s11367-014-0778-2
- Datta A, Bhargava S (2016) Indian Conference on Life Cycle Management. *Int J Life Cycle Assess* 21:920. doi: 10.1007/s11367-016-1103-z
- Datta A, Gupta S (2015) Indian Conference on Life Cycle Management (ILCM) 2015. *Int J Life Cycle Assess* 20:892–893. doi: 10.1007/s11367-015-0882-y
- De Rosa M, Rydberg T, on behalf of the SETAC Europe LCA Steering Committee (2017) SETAC LCA advisory groups silver jubilee: get involved and contribute to the next stage of LCA. *Int J Life Cycle Assess* 22:293–295. doi: 10.1007/s11367-016-1192-8
- de Souza CG, Barbastefano RG, Teixeira RC (2017) Life cycle assessment research in Brazil: characteristics, interdisciplinarity, and applications. *Int J Life Cycle Assess* 22:266–276. doi: 10.1007/s11367-016-1150-5
- De Souza Xavier L, Peixoto JAA, De Souza CG, Pontes AT, Futuro DO (2014) Life cycle thinking in graduate education: An experience from Brazil. *Int J Life Cycle Assess* 19:1433–1444. doi: 10.1007/s11367-014-0749-7
- Del Duce A, Gauch M, Althaus HJ (2016) Electric passenger car transport and passenger car life cycle inventories in ecoinvent version 3. *Int J Life Cycle Assess* 21:1314–1326. doi: 10.1007/s11367-014-0792-4
- Dewaele J (2017) SETAC Europe Young Scientist LCA Award 2017 for Eléonore Loiseau. *Int J Life Cycle Assess* 22:11367. doi: 10.1007/s11367-017-1338-3
- Di Cesare S, Silveri F, Sala S, Petti L (2018) Positive impacts in social life cycle assessment: state of the art and the way forward. *Int J Life Cycle Assess* 23:406–421. doi: 10.1007/s11367-016-1169-7
- Edelen A, Ingwersen WW, Rodríguez C, Alvarenga RAF, de Almeida AR, Wernet G (2018) Critical review of elementary flows in LCA data. *Int J Life Cycle Assess* 23:1261–1273. doi: 10.1007/s11367-017-1354-3
- Ekener E, Hansson J, Gustavsson M (2018) Addressing positive impacts in social LCA—discussing current and new approaches exemplified by the case of vehicle fuels. *Int J Life Cycle Assess* 23:556–568. doi: 10.1007/s11367-016-1058-0
- Engelbrecht S, Ladenika AO, Macgregor OS, Maepa M, Bodunrin MO, Burman NW, Croft J, Goga T, Harding KG (2018) A discussion on the availability of life-cycle assessment studies in New Zealand. *Int J Life Cycle Assess* 23:1708–1713. doi: 10.1007/s11367-018-1485-1
- Estrela S (2015) I publish, therefore I am. Or am I? A reply to *A bibliometric investigation of life cycle assessment research in the web of science databases* by Chen et al. (2014) and *Mapping the scientific research on life cycle assessment: a bibliometric analysis* by Hou et al. (2015). *Int J Life Cycle Assess* 20:1601–1603. doi: 10.1007/s11367-015-0951-2
- Font Vivanco D, van der Voet E (2014) The rebound effect through industrial ecology's eyes: a review of LCA-based studies. *Int J Life Cycle Assess* 19:1933–1947. doi: 10.1007/s11367-014-0802-6
- Fontes J, Tarne P, Traverso M, Bernstein P (2018) Product social impact assessment. *Int J Life Cycle Assess* 23:547–555. doi: 10.1007/s11367-016-1125-6
- Frischknecht R, Knöpfel SB (2014) Ecological scarcity 2013 - New features and its application in industry and administration - 54th LCA forum, Ittigen/Berne, Switzerland, December 5, 2013. *Int J Life Cycle Assess* 19:1361–1366. doi: 10.1007/s11367-014-0744-z

- Frischknecht R, Wyss F, Knöpfel SB, Stolz P (2015) Life cycle assessment in the building sector: analytical tools, environmental information and labels. *Int J Life Cycle Assess* 20:421–425. doi: 10.1007/s11367-015-0856-0
- Gargiulo A, Girardi P, Temporelli A (2017) LCA of electricity networks: a review. *Int J Life Cycle Assess* 22:1502–1513. doi: 10.1007/s11367-017-1279-x
- Glisovic S, Stojiljkovic E, Stojiljkovic P (2018) The state of play in disseminating LCM practices in the Western Balkan region: the attitude of Serbian SMEs. *Int J Life Cycle Assess* 23:1396–1409. doi: 10.1007/s11367-015-0894-7
- Goedkoop M (2016) In response to “Criteria for the evaluation of life cycle assessment software packages and life cycle inventory data with application to concrete” by Seto et al. (2016). *Int J Life Cycle Assess* 21:1213–1214. doi: 10.1007/s11367-016-1141-6
- Gordillo V, Rankovic N, Abdul-Manan AFN (2018) Customizing CO<sub>2</sub> allocation using a new non-iterative method to reflect operational constraints in complex EU refineries. *Int J Life Cycle Assess* 23:1527–1541. doi: 10.1007/s11367-017-1380-1
- Gracey EO, Verones F (2016) Impacts from hydropower production on biodiversity in an LCA framework—review and recommendations. *Int J Life Cycle Assess* 21:412–428. doi: 10.1007/s11367-016-1039-3
- Greig AL, Carey S (2016) International Molybdenum Association (IMO) life cycle assessment program and perspectives on the LCA harmonization effort. *Int J Life Cycle Assess* 21:1554–1558. doi: 10.1007/s11367-015-0990-8
- Grubert E (2018) Rigor in social life cycle assessment: improving the scientific grounding of SLCA. *Int J Life Cycle Assess* 23:481–491. doi: 10.1007/s11367-016-1117-6
- Grubert E (2017) Implicit prioritization in life cycle assessment: text mining and detecting metapatterns in the literature. *Int J Life Cycle Assess* 22:148–158. doi: 10.1007/s11367-016-1153-2
- Güereca LP, Sosa RO, Gilbert HE, Reynaga NS (2015) Life cycle assessment in Mexico: overview of development and implementation. *Int J Life Cycle Assess* 20:311–317. doi: 10.1007/s11367-014-0844-9
- Hannouf M, Assefa G (2016) Comments on the relevance of life cycle costing in sustainability assessment of product systems. *Int J Life Cycle Assess* 21:1059–1062. doi: 10.1007/s11367-016-1136-3
- Heijungs R (2017) On criteria for the evaluation of life cycle assessment software. *Int J Life Cycle Assess* 22:1475–1476. doi: 10.1007/s11367-017-1358-z
- Heijungs R (2014) Ten easy lessons for good communication of LCA. *Int J Life Cycle Assess* 19:473–476. doi: 10.1007/s11367-013-0662-5
- Hicks AL (2018) Saving energy through multifunctional consumer products: an analysis utilizing current literature and life cycle assessment methodology. *Int J Life Cycle Assess* 23:267–278. doi: 10.1007/s11367-017-1321-z
- Hou Q, Mao G, Zhao L, Du H, Zou J (2015) Mapping the scientific research on life cycle assessment: a bibliometric analysis. *Int J Life Cycle Assess* 20:541–555. doi: 10.1007/s11367-015-0846-2
- Hunkeler D (2016) Life Cycle Assessment (LCA): A Guide to Best Practice. *Int J Life Cycle Assess* 21:1063–1066. doi: 10.1007/s11367-016-1083-z
- Hunkeler D (2014) LCA Compendium—The Complete World of Life Cycle Assessment (book series) Series editors: Walter Klöpffer and Mary Ann Curran. *Int J Life Cycle Assess* 19:1779–1781. doi: 10.1007/s11367-016-1041-9
- Ingwensen WW, Hawkins TR, Transue TR, Meyer DE, Moore G, Kahn E, Arbuckle P, Paulsen H, Norris GA (2015) A new data architecture for advancing life cycle assessment. *Int J Life Cycle Assess* 20:520–526. doi: 10.1007/s11367-015-0850-6
- Iofrida N, De Luca AI, Strano A, Gulisano G (2018) Can social research paradigms justify the diversity of approaches to social life cycle assessment? *Int J Life Cycle Assess* 23:464–480. doi: 10.1007/s11367-016-1206-6
- Iofrida N, Strano A, Gulisano G, De Luca AI (2018) Why social life cycle assessment is struggling in development? *Int J Life Cycle Assess* 23:201–203. doi: 10.1007/s11367-017-1381-0
- Jorgensen S V., Hauschild MZ, Nielsen PH (2014) Assessment of urgent impacts of greenhouse gas emissions - the climate tipping potential (CTP). *Int J LCA* 19:919–930. doi: 10.1007/s11367-013-0693-y

- Jullien A, Dauvergne M, Proust C (2015) Road LCA: the dedicated ECORCE tool and database. *Int J Life Cycle Assess* 20:655–670. doi: 10.1007/s11367-015-0858-y
- Klöpffer W, Curran MA (2014) How many case studies should we publish, if any? *Int J Life Cycle Assess* 19:1–2. doi: 10.1007/s11367-013-0667-0
- Koffler C (2014) Reply to “Ten easy lessons for good communication of LCA” by Reinout Heijungs (*Int J Life Cycle Assess* 19(3):473–476. DOI: 10.1007/s11367-013-0662-5). *Int J Life Cycle Assess* 19:1170–1171. doi: 10.1007/s11367-014-0736-z
- Kondo Y, Fukushima Y, Murakami S (2014) EcoBalance 2014: creating benefit through life cycle thinking. *Int J Life Cycle Assess* 19:1172. doi: 10.1007/s11367-014-0727-0
- Kuczynski B (2015) Partial ordering of life cycle inventory databases. *Int J Life Cycle Assess* 20:1673–1683. doi: 10.1007/s11367-015-0972-x
- Kurczewski P (2014) Life cycle thinking in small and medium enterprises: The results of research on the implementation of life cycle tools in Polish SMEs-Part 1: background and framework. *Int J Life Cycle Assess* 19:593–600. doi: 10.1007/s11367-013-0695-9
- Langlois J, Fréon P, Steyer J-P, Delgenès J-P, Hélias A (2014) Sea-use impact category in life cycle assessment: State of the art and perspectives. *Int J Life Cycle Assess* 19:994–1006. doi: 10.1007/s11367-014-0700-y
- Lorenzo-Toja Y, Vázquez-Rowe I, Marín-Navarro D, Crujeiras RM, Moreira MT, Feijoo G (2018) Dynamic environmental efficiency assessment for wastewater treatment plants. *Int J Life Cycle Assess* 23:357–367. doi: 10.1007/s11367-017-1316-9
- Lozano MA, Carvalho M, Serra LM (2014) Tackling environmental impacts in simple trigeneration systems operating under variable conditions. *Int J Life Cycle Assess* 19:1087–1098. doi: 10.1007/s11367-014-0719-0
- Mackenzie SG, Leinonen I, Kyriazakis I (2017) The need for co-product allocation in the life cycle assessment of agricultural systems—is “biophysical” allocation progress? *Int J Life Cycle Assess* 22:128–137. doi: 10.1007/s11367-016-1161-2
- Maepa M, Bodunrin MO, Burman NW, Croft J, Engelbrecht S, Ladenika AO, MacGregor OS, Harding KG (2017) Review: life cycle assessments in Nigeria, Ghana, and Ivory Coast. *Int J Life Cycle Assess* 22:1159–1164. doi: 10.1007/s11367-017-1292-0
- Mancini L, Sala S, Recchioni M, Benini L, Goralczyk M, Pennington D (2015) Potential of life cycle assessment for supporting the management of critical raw materials. *Int J Life Cycle Assess* 20:100–116. doi: 10.1007/s11367-014-0808-0
- Marinković S (2017) On the selection of the functional unit in LCA of structural concrete. *Int J Life Cycle Assess* 22:1634–1636. doi: 10.1007/s11367-017-1379-7
- Markwardt S, Wellenreuther F (2016) Sensitivity analysis as a tool to extend the applicability of LCA findings. *Int J Life Cycle Assess* 21:1148–1158. doi: 10.1007/s11367-016-1094-9
- Martínez-Blanco J, Inaba A, Finkbeiner M (2015a) Scoping organizational LCA—challenges and solutions. *Int J Life Cycle Assess* 20:829–841. doi: 10.1007/s11367-015-0883-x
- Martínez-Blanco J, Inaba A, Quiros A, Valdivia S, Milà-i-Canals L, Finkbeiner M (2015b) Organizational LCA: the new member of the LCA family—introducing the UNEP/SETAC Life Cycle Initiative guidance document. *Int J Life Cycle Assess* 20:1045–1047. doi: 10.1007/s11367-015-0912-9
- Masoni P (2016) LCA Compendium—The Complete World of Life Cycle Assessment (book series) Series editors: Walter Klöpffer and Mary Ann Curran. *Int J Life Cycle Assess* 21:595–600. doi: 10.1007/s11367-016-1041-9
- Mathe S (2014) Integrating participatory approaches into social life cycle assessment: The SLCA participatory approach. *Int J Life Cycle Assess* 19:1506–1514. doi: 10.1007/s11367-014-0758-6
- Mattioda RA, Mazzi A, Canciglieri O, Scipioni A (2015) Determining the principal references of the social life cycle assessment of products. *Int J Life Cycle Assess* 20:1155–1165. doi: 10.1007/s11367-015-0873-z
- Meinshausen I, Müller-Beilschmidt P, Vierle T (2016) The EcoSpold 2 format—why a new format? *Int J Life Cycle Assess* 21:1231–1235. doi: 10.1007/s11367-014-0789-z
- Moreau V, Weidema BP (2015) The computational structure of environmental life cycle costing. *Int J Life Cycle Assess* 20:1359–1363. doi: 10.1007/s11367-015-0952-1

- Moreno OAV, Swarr TE, Asselin AC, Milà i Canals L, Colley T, Valdivia S (2015) Implementation of life cycle management practices in a cluster of companies in Bogota, Colombia. *Int J Life Cycle Assess* 20:723–730. doi: 10.1007/s11367-015-0875-x
- Nansai K, Motoshita M, Daigo I, et al (2017) EcoBalance 2016-responsible value chains for sustainability (October 3-6, 2016, Kyoto, Japan). *Int J Life Cycle Assess* 22:1165–1174. doi: 10.1007/s11367-017-1310-2
- Nilsson-Linden H, Baumann H, Rosen M, Diedrich A (2018) Organizing life cycle management in practice: challenges of a multinational manufacturing corporation. *Int J Life Cycle Assess* 23:1368–1382. doi: 10.1007/s11367-014-0818-y
- Passer A, Lasvaux S, Allacker K, De Lathauwer D, Spirinckx C, Wittstock B, Kellenberger D, Gschösser F, Wall J, Wallbaum H (2015) Environmental product declarations entering the building sector: critical reflections based on 5 to 10 years experience in different European countries. *Int J Life Cycle Assess* 20:1199–1212. doi: 10.1007/s11367-015-0926-3
- Petti L, Serreli M, Di Cesare S (2018) Systematic literature review in social life cycle assessment. *Int J Life Cycle Assess* 23:422–431. doi: 10.1007/s11367-016-1135-4
- Pinsonnault A, Lesage P, Levasseur A, Samson R (2014) Temporal differentiation of background systems in LCA: relevance of adding temporal information in LCI databases. *Int J Life Cycle Assess* 19:1843–1853. doi: 10.1007/s11367-014-0783-5
- Qian G (2016) What causes more LCA research—subjective values, objective problems, or scientific traditions? *Int J Life Cycle Assess* 21:1049–1058. doi: 10.1007/s11367-016-1111-z
- Qian G (2014) Scientometric sorting by importance for literatures on life cycle assessments and some related methodological discussions. *Int J Life Cycle Assess* 19:1462–1467. doi: 10.1007/s11367-014-0747-9
- Ramirez PKS, Petti L, Haberland NT, Ugaya CML (2014) Subcategory assessment method for social life cycle assessment. Part 1: Methodological framework. *Int J Life Cycle Assess* 19:1515–1523. doi: 10.1007/s11367-014-0761-y
- Ramos S, Larrinaga L, Albinarrate U, Jungbluth N, Ingolfsdottir GM, Yngvadottir E, Landquist B, Woodhouse A, Olafsdottir G, Esturo A, Zufia J, Perez-Villareal B (2016) SENSE tool: easy-to-use web-based tool to calculate food product environmental impact. *Int J Life Cycle Assess* 21:710–721. doi: 10.1007/s11367-015-0980-x
- Ray NE, O’Meara T, Williamson T, Izura J-L, Kangas PC (2018) Consideration of carbon dioxide release during shell production in LCA of bivalves. *Int J Life Cycle Assess* 23:1042–1048. doi: 10.1007/s11367-017-1394-8
- Recchioni M, Blengini GA, Fazio S, Mathieux F, Pennington D (2015) Challenges and opportunities for web-shared publication of quality-assured life cycle data: the contributions of the Life Cycle Data Network. *Int J Life Cycle Assess* 20:895–902. doi: 10.1007/s11367-015-0907-6
- Ridoutt BG, Pfister S, Manzardo A, et al (2016) Area of concern: a new paradigm in life cycle assessment for the development of footprint metrics. *Int J Life Cycle Assess* 21:276–280. doi: 10.1007/s11367-015-1011-7
- Russo Garrido S, Parent J, Beaulieu L, Revéret JP (2018) A literature review of type I SLCA—making the logic underlying methodological choices explicit. *Int J Life Cycle Assess* 23:432–444. doi: 10.1007/s11367-016-1067-z
- Schaubroeck T, Gibon T (2017) Outlining reasons to apply hybrid LCA—a reply to “rethinking system boundary in LCA” by Yi Yang (2017). *Int J Life Cycle Assess* 22:1012–1013. doi: 10.1007/s11367-017-1311-1
- Selech J, Joachimiak-Lechman K, Klos Z, Kulczycka J, Kurczewski P (2014) Life cycle thinking in small and medium enterprises: The results of research on the implementation of life cycle tools in Polish SMEs-Part 3: LCC-related aspects. *Int J Life Cycle Assess* 19:1119–1128. doi: 10.1007/s11367-013-0695-9
- Seto KE, Panesar DK, Churchill CJ (2017) Criteria for the evaluation of life cycle assessment software packages and life cycle inventory data with application to concrete. *Int J Life Cycle Assess* 22:694–706. doi: 10.1007/s11367-016-1060-6
- Shafiee M, Brennan F, Espinosa IA (2016) A parametric whole life cost model for offshore wind farms. *Int J Life Cycle Assess* 21:961–975. doi: 10.1007/s11367-016-1075-z



- Siebert A, Bezama A, O’Keeffe S, Thrän D (2018) Social life cycle assessment: in pursuit of a framework for assessing wood-based products from bioeconomy regions in Germany. *Int J Life Cycle Assess* 23:651–662. doi: 10.1007/s11367-016-1066-0
- Soimakallio S, Brandão M, Ekvall T, Cowie A, Finnveden G, Erlandsson M, Koponen K, Karlsson P-E (2016) On the validity of natural regeneration in determination of land-use baseline. *Int J Life Cycle Assess* 21:448–450. doi: 10.1007/s11367-016-1032-x
- Sonnemann G, Valdivia S (2017) Medellin Declaration on Marine Litter in Life Cycle Assessment and Management: Facilitated by the Forum for Sustainability through Life Cycle Innovation (FSLCI) in close cooperation with La Red Iberoamericana de Ciclo de Vida (RICV) on Wednesday 14 of Jun. *Int J Life Cycle Assess* 22:1637–1639. doi: 10.1007/s11367-017-1382-z
- Strothman P, Sonnemann G (2017) Circular economy, resource efficiency, life cycle innovation: same objectives, same impacts? *Int J Life Cycle Assess* 22:1327–1328. doi: 10.1007/s11367-017-1344-5
- Sureau S, Mazijn B, Garrido SR, Achten WMJ (2018) Social life-cycle assessment frameworks: a review of criteria and indicators proposed to assess social and socioeconomic impacts. *Int J Life Cycle Assess* 23:904–920. doi: 10.1007/s11367-017-1336-5
- Traverso M (2018) Is social life cycle assessment really struggling in development or is it on a normal path towards harmonization/standardization? *Int J Life Cycle Assess* 23:199–200. doi: 10.1007/s11367-017-1387-7
- Valdivia S, Sonnemann G, Milà i Canals L (2017) LCA mainstreaming conditions in Latin America—based on learnings from 2005 to 2014. *Int J Life Cycle Assess* 22:485–491. doi: 10.1007/s11367-016-1142-5
- van der Werf HMG, Nguyen TTH (2015) Construction cost of plant compounds provides a physical relationship for co-product allocation in life cycle assessment. *Int J Life Cycle Assess* 20:777–784. doi: 10.1007/s11367-015-0872-0
- van Zanten HHE, Mollenhorst H, Klootwijk CW, van Middelaar CE, de Boer IJM (2016) Global food supply: land use efficiency of livestock systems. *Int J Life Cycle Assess* 21:747–758. doi: 10.1007/s11367-015-0944-1
- Vázquez-Rowe I, Villanueva-Rey P, Moreira MT, Feijoo G (2016) Opportunities and challenges of implementing life cycle assessment in seafood certification: a case study for Spain. *Int J Life Cycle Assess* 21:451–464. doi: 10.1007/s11367-016-1043-7
- Vigon B, Sonnemann G, Asselin A, Schrijvers D, Cirotto A, Chen SS, Braga T, Poolsawad N, Mungkalasiri J, Boureima F, Milà i Canals L (2017) Review of LCA datasets in three emerging economies: a summary of learnings. *Int J Life Cycle Assess* 22:1658–1665. doi: 10.1007/s11367-016-1198-2
- Wang S-W, Hsu C-W, Hu AH (2016) An analytic framework for social life cycle impact assessment—part 1: methodology. *Int J Life Cycle Assess* 21:1514–1528. doi: 10.1007/s11367-016-1114-9
- Weidema BP (2018) The social footprint—a practical approach to comprehensive and consistent social LCA. *Int J Life Cycle Assess* 23:700–709. doi: 10.1007/s11367-016-1172-z
- Westh TB, Hauschild MZ, Birkved M, Jorgensen MS, Rosenbaum RK, Fantke P (2015) The USEtox story: a survey of model developer visions and user requirements. *Int J Life Cycle Assess* 20:299–310. doi: 10.1007/s11367-014-0829-8
- Witczak J, Kasprzak J, Klos Z, Kurczewski P, Lewandowska A, Lewicki R (2014) Life cycle thinking in small and medium enterprises: the results of research on the implementation of life cycle tools in Polish SMEs - part 2: LCA related aspects. *Int J Life Cycle Assess* 19:891–900. doi: 10.1007/s11367-013-0687-9
- Yang Y (2017) Does hybrid LCA with a complete system boundary yield adequate results for product promotion? *Int J Life Cycle Assess* 22:456–460. doi: 10.1007/s11367-016-1256-9
- Yang Y (2015) A note on pesticide-related toxicity impacts of crops in the USA. *Int J Life Cycle Assess* 20:1604–1606. doi: 10.1007/s11367-015-0968-6
- Yang Y, Heijungs R (2017) A generalized computational structure for regional life-cycle assessment. *Int J Life Cycle Assess* 22:213–221. doi: 10.1007/s11367-016-1155-0
- Young SB (2018) Responsible sourcing of metals: certification approaches for conflict minerals and conflict-free metals. *Int J Life Cycle Assess* 23:1429–1447. doi: 10.1007/s11367-015-0932-5

- Zanchi L, Delogu M, Zamagni A, Pierini M (2018) Analysis of the main elements affecting social LCA applications: challenges for the automotive sector. *Int J Life Cycle Assess* 23:519–535. doi: 10.1007/s11367-016-1176-8
- Zanghelini GM, de Souza Junior HRA, Kulay L, Cherubini E, Ribeiro PT, Soares SR (2016) A bibliometric overview of Brazilian LCA research. *Int J Life Cycle Assess* 21:1759–1775. doi: 10.1007/s11367-016-1132-7

## **2. Journal of Cleaner Production**

### **2.1 Attributional life cycle assessment studies**

#### **2.1.1 Uncertainty analysis performed**

##### **2.1.1a Monte Carlo-like approaches**

- Alaviitala T, Mattila TJ (2015) Engineered nanomaterials reduce but do not resolve life cycle environmental impacts of power capacitors. *J Clean Prod* 93:347–353 . doi: 10.1016/j.jclepro.2015.01.036
- Ali SA, Tedone L, De Mastro G (2015) Optimization of the environmental performance of rainfed durum wheat by adjusting the management practices. *J Clean Prod* 87:105–118 . doi: 10.1016/j.jclepro.2014.09.029
- Baek CY, Lee KM, Park KH (2014) Quantification and control of the greenhouse gas emissions from a dairy cow system. *J Clean Prod* 70:50–60 . doi: 10.1016/j.jclepro.2014.02.010
- Bano S, Siluvai Antony P, Jangde V, Biniwale RB (2018) Hydrogen transportation using liquid organic hydrides: A comprehensive life cycle assessment. *J Clean Prod* 183:988–997 . doi: 10.1016/j.jclepro.2018.02.213
- Beames A, Broekx S, Heijungs R, et al (2015) Accounting for land-use efficiency and temporal variations between brownfield remediation alternatives in life-cycle assessment. *J Clean Prod* 101:109–117 . doi: 10.1016/j.jclepro.2015.03.073
- Benton K, Yang X, Wang Z (2017) Life cycle energy assessment of a standby diesel generator set. *J Clean Prod* 149:265–274 . doi: 10.1016/j.jclepro.2017.02.082
- Benveniste G, Pucciarelli M, Torrell M, et al (2017) Life Cycle Assessment of microtubular solid oxide fuel cell based auxiliary power unit systems for recreational vehicles. *J Clean Prod* 165:312–322 . doi: 10.1016/j.jclepro.2017.07.130
- Bicer Y, Dincer I, Zamfirescu C, et al (2016) Comparative life cycle assessment of various ammonia production methods. *J Clean Prod* 135:1379–1395 . doi: 10.1016/j.jclepro.2016.07.023
- Bisinella V, Götze R, Conradsen K, et al (2017) Importance of waste composition for Life Cycle Assessment of waste management solutions. *J Clean Prod* 164:1180–1191 . doi: 10.1016/j.jclepro.2017.07.013
- Busi E, Maranghi S, Corsi L, Basosi R (2016) Environmental sustainability evaluation of innovative self-cleaning textiles. *J Clean Prod* 133:439–450 . doi: 10.1016/j.jclepro.2016.05.072
- Cespi D, Passarini F, Neri E, et al (2014) Life Cycle Assessment comparison of two ways for acrylonitrile production: The SOHIO process and an alternative route using propane. *J Clean Prod* 69:17–25 . doi: 10.1016/j.jclepro.2014.01.057
- Chen W, Geng Y, Hong J, et al (2018) Life cycle assessment of gold production in China. *J Clean Prod* 179:143–150 . doi: 10.1016/j.jclepro.2018.01.114
- Chen X, Corson MS (2014) Influence of emission-factor uncertainty and farm-characteristic variability in LCA estimates of environmental impacts of French dairy farms. *J Clean Prod* 81:150–157 . doi: 10.1016/j.jclepro.2014.06.046
- Cherubini E, Zanghelini GM, Alvarenga RAF, et al (2015) Life cycle assessment of swine production in Brazil: A comparison of four manure management systems. *J Clean Prod* 87:68–77 . doi: 10.1016/j.jclepro.2014.10.035
- Chiu SLH, Lo IMC (2018) Identifying key process parameters for uncertainty propagation in environmental life cycle assessment for sewage sludge and food waste treatment. *J Clean Prod* 174:966–976 . doi: 10.1016/j.jclepro.2017.10.164
- Chou JS, Yeh KC (2015) Life cycle carbon dioxide emissions simulation and environmental cost analysis for building construction. *J Clean Prod* 101:137–147 . doi: 10.1016/j.jclepro.2015.04.001
- Clavreul J, Butnar I, Rubio V, King H (2017) Intra- and inter-year variability of agricultural carbon footprints – A case study on field-grown tomatoes. *J Clean Prod* 158:156–164 . doi: 10.1016/j.jclepro.2017.05.004

- Cluzel F, Yannou B, Millet D, Leroy Y (2016) Eco-ideation and eco-selection of R&D projects portfolio in complex systems industries. *J Clean Prod* 112:4329–4343 . doi: 10.1016/j.jclepro.2015.08.002
- Cobut A, Beauregard R, Blanchet P (2015) Reducing the environmental footprint of interior wood doors in non-residential buildings - Part 2: Ecodesign. *J Clean Prod* 109:247–259 . doi: 10.1016/j.jclepro.2015.05.068
- Corrado S, Castellani V, Zampori L, Sala S (2018) Systematic analysis of secondary life cycle inventories when modelling agricultural production: A case study for arable crops. *J Clean Prod* 172:3990–4000 . doi: 10.1016/j.jclepro.2017.03.179
- Dal Pozzo A, Guglielmi D, Antonioni G, Tugnoli A (2017) Sustainability analysis of dry treatment technologies for acid gas removal in waste-to-energy plants. *J Clean Prod* 162:1061–1074 . doi: 10.1016/j.jclepro.2017.05.203
- Danthurebandara M, Van Passel S, Machiels L, Van Acker K (2015) Valorization of thermal treatment residues in Enhanced Landfill Mining: Environmental and economic evaluation. *J Clean Prod* 99:275–285 . doi: 10.1016/j.jclepro.2015.03.021
- de Almeida CF, Maciel VG, Tsambe M, de Abreu Cybis LF (2017) Environmental assessment of a bi-fuel thermal power plant in an isolated power system in the Brazilian Amazon region. *J Clean Prod* 154:41–50 . doi: 10.1016/j.jclepro.2017.03.209
- de Azevedo A, Fornasier F, da Silva Szarblewski M, et al (2017) Life cycle assessment of bioethanol production from cattle manure. *J Clean Prod* 162:1021–1030 . doi: 10.1016/j.jclepro.2017.06.141
- De Marco I, Riemma S, Iannone R (2018) Uncertainty of input parameters and sensitivity analysis in life cycle assessment: An Italian processed tomato product. *J Clean Prod* 177:315–325 . doi: 10.1016/j.jclepro.2017.12.258
- Dekamin M, Veisi H, Safari E, et al (2015) Life cycle assessment for rainbow trout (*Oncorhynchus mykiss*) production systems: A case study for Iran. *J Clean Prod* 91:43–55 . doi: 10.1016/j.jclepro.2014.12.006
- Denham FC, Biswas WK, Solah VA, Howieson JR (2016) Greenhouse gas emissions from a Western Australian finfish supply chain. *J Clean Prod* 112:2079–2087 . doi: 10.1016/j.jclepro.2014.11.080
- Deschamps J, Simon B, Tagnit-Hamou A, Amor B (2018) Is open-loop recycling the lowest preference in a circular economy? Answering through LCA of glass powder in concrete. *J Clean Prod* 185:14–22 . doi: 10.1016/j.jclepro.2018.03.021
- Duan H, Hu M, Zhang Y, et al (2015) Quantification of carbon emissions of the transport service sector in China by using streamlined life cycle assessment. *J Clean Prod* 95:109–116 . doi: 10.1016/j.jclepro.2015.02.029
- Eckelman MJ, Ciacci L, Kavlak G, et al (2014) Life cycle carbon benefits of aerospace alloy recycling. *J Clean Prod* 80:38–45 . doi: 10.1016/j.jclepro.2014.05.039
- El Bachawati M, Manneh R, Belarbi R, et al (2016) Cradle-to-gate Life Cycle Assessment of traditional gravel ballasted, white reflective, and vegetative roofs: A Lebanese case study. *J Clean Prod* 137:833–842 . doi: 10.1016/j.jclepro.2016.07.170
- Ewertowska A, Pozo C, Gavalda J, et al (2017) Combined use of life cycle assessment, data envelopment analysis and Monte Carlo simulation for quantifying environmental efficiencies under uncertainty. *J Clean Prod* 166:771–783 . doi: 10.1016/j.jclepro.2017.07.215
- Fabbri S, Olsen SI, Owsianiak M (2018) Improving environmental performance of post-harvest supply chains of fruits and vegetables in Europe: Potential contribution from ultrasonic humidification. *J Clean Prod* 182:16–26 . doi: 10.1016/j.jclepro.2018.01.157
- Fantozzi F, Bartocci P, D'Alessandro B, et al (2015) Carbon footprint of truffle sauce in central Italy by direct measurement of energy consumption of different olive harvesting techniques. *J Clean Prod* 87:188–196 . doi: 10.1016/j.jclepro.2014.09.055
- Fedele A, Mazzi A, Niero M, et al (2014) Can the Life Cycle Assessment methodology be adopted to support a single farm on its environmental impacts forecast evaluation between conventional and organic production? An Italian case study. *J Clean Prod* 69:49–59 . doi: 10.1016/j.jclepro.2014.01.034
- Figueiredo F, Castanheira ÉG, Freire F (2017) Life-cycle assessment of irrigated and rainfed sunflower addressing uncertainty and land use change scenarios. *J Clean Prod* 140:436–444 . doi: 10.1016/j.jclepro.2016.06.151

- Fiorentino G, Ripa M, Mellino S, et al (2014) Life cycle assessment of Brassica carinata biomass conversion to bioenergy and platform chemicals. *J Clean Prod* 66:174–187 . doi: 10.1016/j.jclepro.2013.11.043
- Freire ALF, Araújo Júnior CP de, Rosa M de F, et al (2017) Environmental assessment of bioproducts in development stage: The case of fiberboards made from coconut residues. *J Clean Prod* 153:230–241 . doi: 10.1016/j.jclepro.2017.03.100
- García CA, García-Treviño ES, Aguilar-Rivera N, Armendáriz C (2016) Carbon footprint of sugar production in Mexico. *J Clean Prod* 112:2632–2641 . doi: 10.1016/j.jclepro.2015.09.113
- Gargalo CL, Cheali P, Posada JA, et al (2016) Assessing the environmental sustainability of early stage design for bioprocesses under uncertainties: An analysis of glycerol bioconversion. *J Clean Prod* 139:1245–1260 . doi: 10.1016/j.jclepro.2016.08.156
- Gilpin G, Hanssen OJ, Czerwinski J (2014) Biodiesel's and advanced exhaust aftertreatment's combined effect on global warming and air pollution in EU road-freight transport. *J Clean Prod* 78:84–93 . doi: 10.1016/j.jclepro.2014.05.011
- Gómez P, Elduque D, Sarasa J, et al (2015) Influence of the material composition on the environmental impact of surface-mount device (SMD) transistors. *J Clean Prod* 107:722–730 . doi: 10.1016/j.jclepro.2015.05.063
- Güereca LP, Torres N, Juárez-López CR (2015) The co-processing of municipal waste in a cement kiln in Mexico. A life-cycle assessment approach. *J Clean Prod* 107:741–748 . doi: 10.1016/j.jclepro.2015.05.085
- Guerrero AB, Muñoz E (2018) Life cycle assessment of second generation ethanol derived from banana agricultural waste: Environmental impacts and energy balance. *J Clean Prod* 174:710–717 . doi: 10.1016/j.jclepro.2017.10.298
- Guest G, Smith W, Grant B, et al (2017) A comparative life cycle assessment highlighting the trade-offs of a liquid manure separator-composter in a Canadian dairy farm system. *J Clean Prod* 143:824–835 . doi: 10.1016/j.jclepro.2016.12.041
- Häfliger I-F, John V, Passer A, et al (2017) Buildings environmental impacts' sensitivity related to LCA modelling choices of construction materials. *J Clean Prod* 156:805–816 . doi: 10.1016/j.jclepro.2017.04.052
- Henriksson PJG, Tran N, Mohan CV, et al (2017) Indonesian aquaculture futures – Evaluating environmental and socioeconomic potentials and limitations. *J Clean Prod* 162:1482–1490 . doi: 10.1016/j.jclepro.2017.06.133
- Hong J, Shen GQ, Peng Y, et al (2016) Uncertainty analysis for measuring greenhouse gas emissions in the building construction phase: a case study in China. *J Clean Prod* 129:183–195 . doi: 10.1016/j.jclepro.2017.05.146
- Hong J, Shen GQ, Peng Y, et al (2017a) Reprint of: Uncertainty analysis for measuring greenhouse gas emissions in the building construction phase: a case study in China. *J Clean Prod* 163:S420–S432 . doi: 10.1016/j.jclepro.2017.05.146
- Hong J, Zhan S, Yu Z, et al (2018) Life-cycle environmental and economic assessment of medical waste treatment. *J Clean Prod* 174:65–73 . doi: 10.1016/j.jclepro.2017.10.206
- Hong J, Zhang X, Shen Q, et al (2017b) A multi-regional based hybrid method for assessing life cycle energy use of buildings: A case study. *J Clean Prod* 148:760–772 . doi: 10.1016/j.jclepro.2017.02.063
- Hoof G Van, Fan M, Lievens A (2017) Use of product and ingredient tools to assess the environmental profile of automatic dishwashing detergents. *J Clean Prod* 142:3536–3543 . doi: 10.1016/j.jclepro.2016.10.114
- Hou D, Al-Tabbaa A, Guthrie P, et al (2014) Using a hybrid LCA method to evaluate the sustainability of sediment remediation at the London Olympic Park. *J Clean Prod* 83:87–95 . doi: 10.1016/j.jclepro.2014.07.062
- Hou D, Gu Q, Ma F, O'Connell S (2016) Life cycle assessment comparison of thermal desorption and stabilization/solidification of mercury contaminated soil on agricultural land. *J Clean Prod* 139:949–956 . doi: 10.1016/j.jclepro.2016.08.108
- Ingrao C, Gigli M, Siracusa V (2017) An attributional Life Cycle Assessment application experience to highlight environmental hotspots in the production of foamy polylactic acid trays for fresh-food packaging usage. *J Clean Prod* 150:93–103 . doi: 10.1016/j.jclepro.2017.03.007

- Isola C, Sieverding HL, Raghunathan R, et al (2017) Life cycle assessment of photodegradable polymeric material derived from renewable bioresources. *J Clean Prod* 142:2935–2944 . doi: 10.1016/j.jclepro.2016.10.177
- Jeong H, Broesicke OA, Drew B, Crittenden JC (2018) Life cycle assessment of small-scale greywater reclamation systems combined with conventional centralized water systems for the City of Atlanta, Georgia. *J Clean Prod* 174:333–342 . doi: 10.1016/j.jclepro.2017.10.193
- Jeswani HK, Gujba H, Brown NW, et al (2015) Removal of organic compounds from water: Life cycle environmental impacts and economic costs of the Arvia process compared to granulated activated carbon. *J Clean Prod* 89:203–213 . doi: 10.1016/j.jclepro.2014.11.017
- Jiang Q, Li T, Liu Z, et al (2014) Life Cycle Assessment of an engine with input-output based hybrid analysis method. *J Clean Prod* 78:131–138 . doi: 10.1016/j.jclepro.2014.04.003
- Kozderka M, Rose B, Kočí V, et al (2016) High impact polypropylene (HIPP) recycling – Mechanical resistance and Lifecycle Assessment (LCA) case study with improved efficiency by preliminary sensitivity analysis. *J Clean Prod* 137:1004–1017 . doi: 10.1016/j.jclepro.2016.07.217
- L'Abbate P, Dassisti M, Cappelletti GM, et al (2018) Environmental analysis of polyester fabric for ticking. *J Clean Prod* 172:735–742 . doi: 10.1016/j.jclepro.2017.10.045
- Lavers A, Kalmykova Y, Rosado L, et al (2017) Selecting representative products for quantifying environmental impacts of consumption in urban areas. *J Clean Prod* 162:34–44 . doi: 10.1016/j.jclepro.2017.06.030
- Li H, Jin C, Mundree S (2017a) Hybrid environmental and economic assessment of four approaches recovering energy from sludge with variant organic contents. *J Clean Prod* 153:131–138 . doi: 10.1016/j.jclepro.2017.03.167
- Li W, Bai H, Yin J, Xu H (2016) Life cycle assessment of end-of-life vehicle recycling processes in China - Take Corolla taxis for example. *J Clean Prod* 117:176–187 . doi: 10.1016/j.jclepro.2016.01.025
- Li Z, Lu L, Lv P, et al (2017b) Carbon footprints of pre-impoundment clearance on reservoir flooded area in China's large hydro-projects: Implications for GHG emissions reduction in the hydropower industry. *J Clean Prod* 168:1413–1424 . doi: 10.1016/j.jclepro.2017.09.091
- Littlefield JA, Marriott J, Schivley GA, Skone TJ (2017) Synthesis of recent ground-level methane emission measurements from the U.S. natural gas supply chain. *J Clean Prod* 148:118–126 . doi: 10.1016/j.jclepro.2017.01.101
- Liu X, Yuan Z (2016) Life cycle environmental performance of by-product coke production in China. *J Clean Prod* 112:1292–1301 . doi: 10.1016/j.jclepro.2014.12.102
- Lo Giudice A, Ingraio C, Clasadonte MT, et al (2017) Life cycle assessment for highlighting environmental hotspots in the Sicilian traditional ceramic sector: the case of ornamental ceramic plates. *J Clean Prod* 142:225–239 . doi: 10.1016/j.jclepro.2016.05.028
- Longo S, Antonucci V, Cellura M, Ferraro M (2014) Life cycle assessment of storage systems: The case study of a sodium/nickel chloride battery. *J Clean Prod* 85:337–346 . doi: 10.1016/j.jclepro.2013.10.004
- Lopes J, Medeiros DL, Kiperstok A (2018) Combining cleaner production and life cycle assessment for reducing the environmental impacts of irrigated carrot production in Brazilian semi-arid region. *J Clean Prod* 170:924–939 . doi: 10.1016/j.jclepro.2017.08.198
- López-Andrés JJ, Aguilar-Lasserre AA, Morales-Mendoza LF, et al (2018) Environmental impact assessment of chicken meat production via an integrated methodology based on LCA, simulation and genetic algorithms. *J Clean Prod* 174:477–491 . doi: 10.1016/j.jclepro.2017.10.307
- Lu HR, El Hanandeh A, Gilbert BP (2017) A comparative life cycle study of alternative materials for Australian multi-storey apartment building frame constructions: Environmental and economic perspective. *J Clean Prod* 166:458–473 . doi: 10.1016/j.jclepro.2017.08.065
- Ma X, Qi C, Ye L, et al (2017) Life cycle assessment of tungsten carbide powder production: A case study in China. *J Clean Prod* 149:936–944 . doi: 10.1016/j.jclepro.2017.02.184
- Maciel VG, Zortea RB, Grillo IB, et al (2016) Greenhouse gases assessment of soybean cultivation steps in southern Brazil. *J Clean Prod* 131:747–753 . doi: 10.1016/j.jclepro.2016.04.100
- Mackenzie SG, Leinonen I, Ferguson N, Kyriazakis I (2016) Can the environmental impact of pig systems be reduced by utilising co-products as feed? *J Clean Prod* 115:172–181 . doi: 10.1016/j.jclepro.2015.12.074

- Maia de Souza D, Lafontaine M, Charron-Doucet F, et al (2016) Comparative life cycle assessment of ceramic brick, concrete brick and cast-in-place reinforced concrete exterior walls. *J Clean Prod* 137:70–82 . doi: 10.1016/j.jclepro.2016.07.069
- Manandhar A, Shah A (2017) Life cycle assessment of feedstock supply systems for cellulosic biorefineries using corn stover transported in conventional bale and densified pellet formats. *J Clean Prod* 166:601–614 . doi: 10.1016/j.jclepro.2017.08.083
- Mao R, Duan H, Dong D, et al (2017) Quantification of carbon footprint of urban roads via life cycle assessment: Case study of a megacity-Shenzhen, China. *J Clean Prod* 166:40–48 . doi: 10.1016/j.jclepro.2017.07.173
- Marchi M, Pulselli FM, Mangiavacchi S, et al (2017) The greenhouse gas inventory as a tool for planning integrated waste management systems: a case study in central Italy. *J Clean Prod* 142:351–359 . doi: 10.1016/j.jclepro.2016.05.035
- McAuliffe GA, Takahashi T, Mogensen L, et al (2017) Environmental trade-offs of pig production systems under varied operational efficiencies. *J Clean Prod* 165:1163–1173 . doi: 10.1016/j.jclepro.2017.07.191
- McAuliffe GA, Takahashi T, Orr RJ, et al (2018) Distributions of emissions intensity for individual beef cattle reared on pasture-based production systems. *J Clean Prod* 171:1672–1680 . doi: 10.1016/j.jclepro.2018.01.075
- Medeiros M V., Aubin J, Camargo AFM (2017) Life cycle assessment of fish and prawn production: Comparison of monoculture and polyculture freshwater systems in Brazil. *J Clean Prod* 156:528–537 . doi: 10.1016/j.jclepro.2017.04.059
- Meyer DE, Katz JP (2016) Analyzing the environmental impacts of laptop enclosures using screening-level life cycle assessment to support sustainable consumer electronics. *J Clean Prod* 112:369–383 . doi: 10.1016/j.jclepro.2015.05.143
- Mohammadi A, Cowie A, Anh Mai TL, et al (2016) Biochar use for climate-change mitigation in rice cropping systems. *J Clean Prod* 116:61–70 . doi: 10.1016/j.jclepro.2015.12.083
- Mohammadi A, Cowie AL, Anh Mai TL, et al (2017) Climate-change and health effects of using rice husk for biochar-compost: Comparing three pyrolysis systems. *J Clean Prod* 162:260–272 . doi: 10.1016/j.jclepro.2017.06.026
- Mohammed F, Biswas WK, Yao H, Tadó M (2016) Identification of an environmentally friendly symbiotic process for the reuse of industrial byproduct - An LCA perspective. *J Clean Prod* 112:3376–3387 . doi: 10.1016/j.jclepro.2015.09.104
- Neri E, Passarini F, Cespi D, et al (2018) Sustainability of a bio-waste treatment plant: Impact evolution resulting from technological improvements. *J Clean Prod* 171:1006–1019 . doi: 10.1016/j.jclepro.2017.10.082
- Niero M, Negrelli AJ, Hoffmeyer SB, et al (2016) Closing the loop for aluminum cans: Life Cycle Assessment of progression in Cradle-to-Cradle certification levels. *J Clean Prod* 126:352–362 . doi: 10.1016/j.jclepro.2016.02.122
- O'Connor M, Garnier G, Batchelor W (2014) Life cycle assessment comparison of industrial effluent management strategies. *J Clean Prod* 79:168–181 . doi: 10.1016/j.jclepro.2014.05.066
- Pashaei Kamali F, Meuwissen MPM, de Boer IJM, et al (2017) Evaluation of the environmental, economic, and social performance of soybean farming systems in southern Brazil. *J Clean Prod* 142:385–394 . doi: 10.1016/j.jclepro.2016.03.135
- Pattara C, Salomone R, Cichelli A (2016) Carbon footprint of extra virgin olive oil: a comparative and driver analysis of different production processes in Centre Italy. *J Clean Prod* 127:533–547 . doi: 10.1016/j.jclepro.2016.03.152
- Pehlken A, Decker A, Kottowski C, et al (2015) Energy efficiency in processing of natural raw materials under consideration of uncertainties. *J Clean Prod* 106:351–363 . doi: 10.1016/j.jclepro.2014.08.076
- Piao W, Kim Y, Kim H, et al (2016) Life cycle assessment and economic efficiency analysis of integrated management of wastewater treatment plants. *J Clean Prod* 113:325–337 . doi: 10.1016/j.jclepro.2015.11.012
- Pintilie L, Torres CM, Teodosiu C, Castells F (2016) Urban wastewater reclamation for industrial reuse: An LCA case study. *J Clean Prod* 139:1–14 . doi: 10.1016/j.jclepro.2016.07.209

- Pommier R, Grimaud G, Prinçaud M, et al (2016) LCA (Life Cycle Assessment) of EVP - Engineering veneer product: Plywood glued using a vacuum moulding technology from green veneers. *J Clean Prod* 124:383–394 . doi: 10.1016/j.jclepro.2016.02.130
- Pons JJ, Penadés-Plà V, Yepes V, Martí J V. (2018) Life cycle assessment of earth-retaining walls: An environmental comparison. *J Clean Prod* 192:411–420 . doi: 10.1016/j.jclepro.2018.04.268
- Pourzahedi L, Zhai P, Isaacs JA, Eckelman MJ (2017) Life cycle energy benefits of carbon nanotubes for electromagnetic interference (EMI) shielding applications. *J Clean Prod* 142:1971–1978 . doi: 10.1016/j.jclepro.2016.11.087
- Pryshlakivsky J, Searcy C (2017) Uncertainty analysis focusing on the variance of energy intensity of vehicle materials. *J Clean Prod* 143:1165–1182 . doi: 10.1016/j.jclepro.2016.12.004
- Qi C, Ma X, Wang M, et al (2017a) A case study on the life cycle assessment of recycling industrial mercury-containing waste. *J Clean Prod* 161:382–389 . doi: 10.1016/j.jclepro.2017.05.023
- Qi C, Wang Q, Ma X, et al (2018) Inventory, environmental impact, and economic burden of GHG emission at the city level: Case study of Jinan, China. *J Clean Prod* 192:236–243 . doi: 10.1016/j.jclepro.2018.04.259
- Qi C, Ye L, Ma X, et al (2017b) Life cycle assessment of the hydrometallurgical zinc production chain in China. *J Clean Prod* 156:451–458 . doi: 10.1016/j.jclepro.2017.04.084
- Razza F, Innocenti FD, Dobon A, et al (2015) Environmental profile of a bio-based and biodegradable foamed packaging prototype in comparison with the current benchmark. *J Clean Prod* 102:493–500 . doi: 10.1016/j.jclepro.2015.04.033
- Rodrigues C, Kirchain R, Freire F, Gregory J (2018) Streamlined environmental and cost life-cycle approach for building thermal retrofits: A case of residential buildings in South European climates. *J Clean Prod* 172:2625–2635 . doi: 10.1016/j.jclepro.2017.11.148
- Rodriguez-Illera M, Nikiforidis C V., van der Goot AJ, Boom RM (2017) Exergy efficiency from staple food ingredients to body metabolism: The case of carbohydrates. *J Clean Prod* 142:4101–4113 . doi: 10.1016/j.jclepro.2016.10.009
- Ruan S, Unluer C (2017) Influence of supplementary cementitious materials on the performance and environmental impacts of reactive magnesia cement concrete. *J Clean Prod* 159:62–73 . doi: 10.1016/j.jclepro.2017.05.044
- Ruviaro CF, De Léis CM, Lampert VDN, et al (2015) Carbon footprint in different beef production systems on a southern Brazilian farm: A case study. *J Clean Prod* 96:435–443 . doi: 10.1016/j.jclepro.2014.01.037
- Sabia E, Napolitano F, Claps S, et al (2018) Dairy buffalo life cycle assessment as affected by heifer rearing system. *J Clean Prod* 192:647–655 . doi: 10.1016/j.jclepro.2018.04.158
- Santos T de L, Nunes ABA, Giongo V, et al (2018) Cleaner fruit production with green manure: The case of Brazilian melons. *J Clean Prod* 181:260–270 . doi: 10.1016/j.jclepro.2017.12.266
- Schueler M, Hansen S, Paulsen HM (2018) Discrimination of milk carbon footprints from different dairy farms when using IPCC Tier 1 methodology for calculation of GHG emissions from managed soils. *J Clean Prod* 177:899–907 . doi: 10.1016/j.jclepro.2017.12.227
- Secchi M, Castellani V, Collina E, et al (2016) Assessing eco-innovations in green chemistry: Life Cycle Assessment (LCA) of a cosmetic product with a bio-based ingredient. *J Clean Prod* 129:269–281 . doi: 10.1016/j.jclepro.2016.04.073
- Sen B, Ercan T, Tatari O (2017) Does a battery-electric truck make a difference? – Life cycle emissions, costs, and externality analysis of alternative fuel-powered Class 8 heavy-duty trucks in the United States. *J Clean Prod* 141:110–121 . doi: 10.1016/j.jclepro.2016.09.046
- Sim J, Prabhu V (2018) The life cycle assessment of energy and carbon emissions on wool and nylon carpets in the United States. *J Clean Prod* 170:1231–1243 . doi: 10.1016/j.jclepro.2017.09.203
- Song Q, Wang Z, Wu Y, et al (2018) Could urban electric public bus really reduce the GHG emissions: A case study in Macau? *J Clean Prod* 172:2133–2142 . doi: 10.1016/j.jclepro.2017.11.206
- Song X, Pettersen JB, Pedersen KB, Røberg S (2017) Comparative life cycle assessment of tailings management and energy scenarios for a copper ore mine: A case study in Northern Norway. *J Clean Prod* 164:892–904 . doi: 10.1016/j.jclepro.2017.07.021

- Souza DM De, Lafontaine M, Charron-Doucet F, et al (2015) Comparative Life Cycle Assessment of ceramic versus concrete roof tiles in the Brazilian context. *J Clean Prod* 89:165–173 . doi: 10.1016/j.jclepro.2014.11.029
- Su X, Luo Z, Li Y, Huang C (2016) Life cycle inventory comparison of different building insulation materials and uncertainty analysis. *J Clean Prod* 112:275–281 . doi: 10.1016/j.jclepro.2015.08.113
- Sun M, Wang Y, Hong J, et al (2016) Life cycle assessment of a bio-hydrometallurgical treatment of spent Zn-Mn batteries. *J Clean Prod* 129:350–358 . doi: 10.1016/j.jclepro.2016.04.058
- Sy CL, Ubando AT, Aviso KB, Tan RR (2018) Multi-objective target oriented robust optimization for the design of an integrated biorefinery. *J Clean Prod* 170:496–509 . doi: 10.1016/j.jclepro.2017.09.140
- Tabatabaie SMH, Murthy GS (2016) Cradle to farm gate life cycle assessment of strawberry production in the United States. *J Clean Prod* 127:548–554 . doi: 10.1016/j.jclepro.2016.03.175
- Tabatabaie SMH, Tahami H, Murthy GS (2018) A regional life cycle assessment and economic analysis of camelina biodiesel production in the Pacific Northwestern US. *J Clean Prod* 172:2389–2400 . doi: 10.1016/j.jclepro.2017.11.172
- Tallentire CW, Mackenzie SG, Kyriazakis I (2018) Can novel ingredients replace soybeans and reduce the environmental burdens of European livestock systems in the future? *J Clean Prod* 187:338–347 . doi: 10.1016/j.jclepro.2018.03.212
- Tannous S, Manneh R, Harajli H, El Zakhem H (2018) Comparative cradle-to-grave life cycle assessment of traditional grid-connected and solar stand-alone street light systems: A case study for rural areas in Lebanon. *J Clean Prod* 186:963–977 . doi: 10.1016/j.jclepro.2018.03.155
- Tecchio P, Freni P, De Benedetti B, Fenouillot F (2016) Ex-ante Life Cycle Assessment approach developed for a case study on bio-based polybutylene succinate. *J Clean Prod* 112:316–325 . doi: 10.1016/j.jclepro.2015.07.090
- Teh SH, Wiedmann T, Castel A, de Burgh J (2017) Hybrid life cycle assessment of greenhouse gas emissions from cement, concrete and geopolymer concrete in Australia. *J Clean Prod* 152:312–320 . doi: 10.1016/j.jclepro.2017.03.122
- Thévenot A, Rivera JL, Wilfart A, et al (2018) Mealworm meal for animal feed: Environmental assessment and sensitivity analysis to guide future prospects. *J Clean Prod* 170:1260–1267 . doi: 10.1016/j.jclepro.2017.09.054
- Thibodeau C, Monette F, Bulle C, Glaus M (2014) Comparison of black water source-separation and conventional sanitation systems using life cycle assessment. *J Clean Prod* 67:45–57 . doi: 10.1016/j.jclepro.2013.12.012
- Trompeta AF, Koklioti MA, Perivoliotis DK, et al (2016) Towards a holistic environmental impact assessment of carbon nanotube growth through chemical vapour deposition. *J Clean Prod* 129:384–394 . doi: 10.1016/j.jclepro.2016.04.044
- Tu Q, McDonnell BE (2016) Monte Carlo analysis of life cycle energy consumption and greenhouse gas (GHG) emission for biodiesel production from trap grease. *J Clean Prod* 112:2674–2683 . doi: 10.1016/j.jclepro.2015.10.028
- Vaskan P, Pachón ER, Gnansounou E (2018) Techno-economic and life-cycle assessments of biorefineries based on palm empty fruit bunches in Brazil. *J Clean Prod* 172:3655–3668 . doi: 10.1016/j.jclepro.2017.07.218
- Wiedemann S, McGahan E, Murphy C, et al (2015) Environmental impacts and resource use of Australian beef and lamb exported to the USA determined using life cycle assessment. *J Clean Prod* 94:67–75 . doi: 10.1016/j.jclepro.2015.01.073
- Wiedemann SG, Yan MJ, Henry BK, Murphy CM (2016) Resource use and greenhouse gas emissions from three wool production regions in Australia. *J Clean Prod* 122:121–132 . doi: 10.1016/j.jclepro.2016.02.025
- Xie HB, Wu WJ, Wang YF (2018a) Life-time reliability based optimization of bridge maintenance strategy considering LCA and LCC. *J Clean Prod* 176:36–45 . doi: 10.1016/j.jclepro.2017.12.123
- Xie M, Ruan J, Bai W, et al (2018b) Pollutant payback time and environmental impact of Chinese multi-crystalline photovoltaic production based on life cycle assessment. *J Clean Prod* 184:648–659 . doi: 10.1016/j.jclepro.2018.02.290



- Xu C, Hong J, Chen J, et al (2016) Is biomass energy really clean? An environmental life-cycle perspective on biomass-based electricity generation in China. *J Clean Prod* 133:767–776 . doi: 10.1016/j.jclepro.2016.05.181
- Xu C, Hong J, Jia H, et al (2017) Life cycle environmental and economic assessment of a LID-BMP treatment train system: A case study in China. *J Clean Prod* 149:227–237 . doi: 10.1016/j.jclepro.2017.02.086
- Yao Y, Masanet E (2018) Life-cycle modeling framework for generating energy and greenhouse gas emissions inventory of emerging technologies in the chemical industry. *J Clean Prod* 172:768–777 . doi: 10.1016/j.jclepro.2017.10.125
- Ye L, Hong J, Ma X, et al (2018) Life cycle environmental and economic assessment of ceramic tile production: A case study in China. *J Clean Prod* 189:432–441 . doi: 10.1016/j.jclepro.2018.04.112
- Ye L, Qi C, Hong J, Ma X (2017) Life cycle assessment of polyvinyl chloride production and its recyclability in China. *J Clean Prod* 142:2965–2972 . doi: 10.1016/j.jclepro.2016.10.171
- Yina S, Tuladhar R, Sheehan M, et al (2016) A life cycle assessment of recycled polypropylene fibre in concrete footpaths. *J Clean Prod* 112:2231–2242 . doi: 10.1016/j.jclepro.2015.09.073
- Yuan Q, Song G, Fullana-i-Palmer P, et al (2017) Water footprint of feed required by farmed fish in China based on a Monte Carlo-supported von Bertalanffy growth model: A policy implication. *J Clean Prod* 153:41–50 . doi: 10.1016/j.jclepro.2017.03.134
- Yue W, Cai Y, Su M, et al (2018) A hybrid copula and life cycle analysis approach for evaluating violation risks of GHG emission targets in food production under urbanization. *J Clean Prod* 190:655–665 . doi: 10.1016/j.jclepro.2018.04.061
- Zea Escamilla E, Habert G (2014) Environmental impacts of bamboo-based construction materials representing global production diversity. *J Clean Prod* 69:117–127 . doi: 10.1016/j.jclepro.2014.01.067
- Zehetmeier M, Gandorfer M, Hoffmann H, et al (2014) The impact of uncertainties on predicted greenhouse gas emissions of dairy cow production systems. *J Clean Prod* 73:116–124 . doi: 10.1016/j.jclepro.2013.09.054
- Zhang Y, Sun M, Hong J, et al (2016) Environmental footprint of aluminum production in China. *J Clean Prod* 133:1242–1251 . doi: 10.1016/j.jclepro.2016.04.137

### **2.1.1b Probabilistic (other than Monte Carlo)**

- Bojacá CR, Wyckhuys KAG, Schrevens E (2014) Life cycle assessment of Colombian greenhouse tomato production based on farmer-level survey data. *J Clean Prod* 69:26–33 . doi: 10.1016/j.jclepro.2014.01.078
- Chen X, Samson E, Tocqueville A, Aubin J (2015) Environmental assessment of trout farming in France by life cycle assessment: Using bootstrapped principal component analysis to better define system classification. *J Clean Prod* 87:87–95 . doi: 10.1016/j.jclepro.2014.09.021
- Feiz R, Ammenberg J, Baas L, et al (2015) Improving the CO<sub>2</sub> performance of cement, part I: Utilizing life-cycle assessment and key performance indicators to assess development within the cement industry. *J Clean Prod* 98:272–281 . doi: 10.1016/j.jclepro.2014.01.083
- Morales Mora MA, Pretelín Vergara FC, Martínez Delgado SA, Leiva MA (2017) Comparison of carbon balance measuring tools in an enhanced oil recovery project based on the carbon dioxide from the ammonia production process streams. *J Clean Prod* 144:540–552 . doi: 10.1016/j.jclepro.2016.12.114
- Vieira DR, Bravo A (2016) Life cycle carbon emissions assessment using an eco-demonstrator aircraft: The case of an ecological wing design. *J Clean Prod* 124:246–257 . doi: 10.1016/j.jclepro.2016.02.089

### **2.1.1c Taylor series**

- Chen W, Zhang F, Hong J, et al (2016) Life cycle toxicity assessment on deep-brine well drilling. *J Clean Prod* 112:326–332 . doi: 10.1016/j.jclepro.2015.07.062
- Hoxha E, Habert G, Chevalier J, et al (2014) Method to analyse the contribution of material's sensitivity in buildings' environmental impact. *J Clean Prod* 66:54–64 . doi: 10.1016/j.jclepro.2013.10.056

### **2.1.1d Scenario analysis**

- Bais-Moleman AL, Sikkema R, Vis M, et al (2018) Assessing wood use efficiency and greenhouse gas emissions of wood product cascading in the European Union. *J Clean Prod* 172:3942–3954 . doi: 10.1016/j.jclepro.2017.04.153
- Benetto E, Jury C, Kneip G, et al (2015) Life cycle assessment of heat production from grape marc pellets. *J Clean Prod* 87:149–158 . doi: 10.1016/j.jclepro.2014.10.028
- Bernstad Saraiva A, Pacheco EBAV, Gomes GM, et al (2016) Comparative lifecycle assessment of mango packaging made from a polyethylene/natural fiber-composite and from cardboard material. *J Clean Prod* 139:1168–1180 . doi: 10.1016/j.jclepro.2016.08.135
- Bian J, Bai H, Li W, et al (2016) Comparative environmental life cycle assessment of waste mobile phone recycling in China. *J Clean Prod* 131:209–218 . doi: 10.1016/j.jclepro.2016.05.047
- Gasso V, Oudshoorn FW, Sørensen CAG, Pedersen HH (2014) An environmental life cycle assessment of controlled traffic farming. *J Clean Prod* 73:175–182 . doi: 10.1016/j.jclepro.2013.10.044
- Hayashi K, Makino N, Shobatake K, Hokazono S (2014) Influence of scenario uncertainty in agricultural inputs on life cycle greenhouse gas emissions from agricultural production systems: The case of chemical fertilizers in Japan. *J Clean Prod* 73:109–115 . doi: 10.1016/j.jclepro.2013.11.051
- Lastoskie CM, Dai Q (2015) Comparative life cycle assessment of laminated and vacuum vapor-deposited thin film solid-state batteries. *J Clean Prod* 91:158–169 . doi: 10.1016/j.jclepro.2014.12.003
- Maes D, Van Dael M, Vanheusden B, et al (2015) Assessment of the sustainability guidelines of EU Renewable Energy Directive: The case of biorefineries. *J Clean Prod* 88:61–70 . doi: 10.1016/j.jclepro.2014.04.051
- Yoshida H, ten Hoeve M, Christensen TH, et al (2018) Life cycle assessment of sewage sludge management options including long-term impacts after land application. *J Clean Prod* 174:538–547 . doi: 10.1016/j.jclepro.2017.10.175

### **2.1.1e Qualitative/pedigree**

- Delivand MK, Cammerino ARB, Garofalo P, Monteleone M (2015) Optimal locations of bioenergy facilities, biomass spatial availability, logistics costs and GHG (greenhouse gas) emissions: A case study on electricity productions in South Italy. *J Clean Prod* 99:129–139 . doi: 10.1016/j.jclepro.2015.03.018
- Ismaeel WSE (2018) Midpoint and endpoint impact categories in Green building rating systems. *J Clean Prod* 182:783–793 . doi: 10.1016/j.jclepro.2018.01.217
- Li C, Bai H, Lu Y, et al (2018) Life-cycle assessment for coal-based methanol production in China. *J Clean Prod* 188:1004–1017 . doi: 10.1016/j.jclepro.2018.04.051

### **2.1.1f Sensitivity analysis**

- Abbas D, Handler RM (2018) Life-cycle assessment of forest harvesting and transportation operations in Tennessee. *J Clean Prod* 176:512–520 . doi: 10.1016/j.jclepro.2017.11.238
- Aghbashlo M, Rosen MA (2018) Consolidating exergoeconomic and exergoenvironmental analyses using the emergy concept for better understanding energy conversion systems. *J Clean Prod* 172:696–708 . doi: 10.1016/j.jclepro.2017.10.205
- Angeles DA, Tan RR, Aviso KB, et al (2018) Fuzzy optimization of the automotive ammonia fuel cycle. *J Clean Prod* 186:877–882 . doi: 10.1016/j.jclepro.2018.03.143
- Arvidsson R, Kushnir D, Molander S, Sandén BA (2016) Energy and resource use assessment of graphene as a substitute for indium tin oxide in transparent electrodes. *J Clean Prod* 132:289–297 . doi: 10.1016/j.jclepro.2015.04.076
- Astudillo MF, Thalwitz G, Vollrath F (2014) Life cycle assessment of Indian silk. *J Clean Prod* 81:158–167 . doi: 10.1016/j.jclepro.2014.06.007
- Bach V, Berger M, Henßler M, et al (2016) Integrated method to assess resource efficiency – ESSENZ. *J Clean Prod* 137:118–130 . doi: 10.1016/j.jclepro.2016.07.077
- Bobba S, Ardente F, Mathieux F (2016) Environmental and economic assessment of durability of energy-using products: Method and application to a case-study vacuum cleaner. *J Clean Prod* 137:762–776 . doi: 10.1016/j.jclepro.2016.07.093

- Chen L, Pelton REO, Smith TM (2016) Comparative life cycle assessment of fossil and bio-based polyethylene terephthalate (PET) bottles. *J Clean Prod* 137:667–676 . doi: 10.1016/j.jclepro.2016.07.094
- de Andrade CES, de Almeida D'Agosto M (2016) Energy use and carbon dioxide emissions assessment in the lifecycle of passenger rail systems: the case of the Rio de Janeiro Metro. *J Clean Prod* 126:526–536 . doi: 10.1016/j.jclepro.2016.03.094
- Du G, Pettersson L, Karoumi R (2018) Soil-steel composite bridge: An alternative design solution for short spans considering LCA. *J Clean Prod* 189:647–661 . doi: 10.1016/j.jclepro.2018.04.097
- Eickelkamp T (2015) Significance of fixed assets in life cycle assessments. *J Clean Prod* 101:97–108 . doi: 10.1016/j.jclepro.2015.03.075
- Ekener E, Hansson J, Larsson A, Peck P (2018) Developing Life Cycle Sustainability Assessment methodology by applying values-based sustainability weighting - Tested on biomass based and fossil transportation fuels. *J Clean Prod* 181:337–351 . doi: 10.1016/j.jclepro.2018.01.211
- Favi C, Germani M, Landi D, et al (2018) Comparative life cycle assessment of cooking appliances in Italian kitchens. *J Clean Prod* 186:430–449 . doi: 10.1016/j.jclepro.2018.03.140
- Feng C, Gao X, Tang Y, Zhang Y (2014) Comparative life cycle environmental assessment of flue gas desulfurization technologies in China. *J Clean Prod* 68:81–92 . doi: 10.1016/j.jclepro.2013.10.023
- Forman GS, Hauser AB, Adda SM (2014) Life cycle analysis of gas to liquids (GTL) derived linear alkyl benzene. *J Clean Prod* 80:30–37 . doi: 10.1016/j.jclepro.2014.05.058
- Gallagher J, Styles D, McNabola A, Williams AP (2015) Life cycle environmental balance and greenhouse gas mitigation potential of micro-hydropower energy recovery in the water industry. *J Clean Prod* 99:152–159 . doi: 10.1016/j.jclepro.2015.03.011
- Garfí M, Flores L, Ferrer I (2017) Life Cycle Assessment of wastewater treatment systems for small communities: Activated sludge, constructed wetlands and high rate algal ponds. *J Clean Prod* 161:211–219 . doi: 10.1016/j.jclepro.2017.05.116
- Gilbert P, Alexander S, Thornley P, Brammer J (2014) Assessing economically viable carbon reductions for the production of ammonia from biomass gasification. *J Clean Prod* 64:581–589 . doi: 10.1016/j.jclepro.2013.09.011
- Gilbert P, Walsh C, Traut M, et al (2018) Assessment of full life-cycle air emissions of alternative shipping fuels. *J Clean Prod* 172:855–866 . doi: 10.1016/j.jclepro.2017.10.165
- Groen EA, Van Zanten HHE, Heijungs R, et al (2016) Sensitivity analysis of greenhouse gas emissions from a pork production chain. *J Clean Prod* 129:202–211 . doi: 10.1016/j.jclepro.2016.04.081
- Hossain MU, Poon CS (2018) Comparative LCA of wood waste management strategies generated from building construction activities. *J Clean Prod* 177:387–397 . doi: 10.1016/j.jclepro.2017.12.233
- Huang J, Xu CC, Ridoutt BG, et al (2014) Water availability footprint of milk and milk products from large-scale dairy production systems in Northeast China. *J Clean Prod* 79:91–97 . doi: 10.1016/j.jclepro.2014.05.043
- Igos E, Dalle A, Tiruta-Barna L, et al (2014) Life Cycle Assessment of water treatment: What is the contribution of infrastructure and operation at unit process level? *J Clean Prod* 65:424–431 . doi: 10.1016/j.jclepro.2013.07.061
- Ingwersen W, Gausman M, Weisbrod A, et al (2016) Detailed life cycle assessment of Bounty® paper towel operations in the United States. *J Clean Prod* 131:509–522 . doi: 10.1016/j.jclepro.2016.04.149
- Jensen JK, Arlbjørn JS (2014) Product carbon footprint of rye bread. *J Clean Prod* 82:45–57 . doi: 10.1016/j.jclepro.2014.06.061
- Kazemi A, Bahramifar N, Heydari A, Olsen SI (2018) Life cycle assessment of nanoadsorbents at early stage technological development. *J Clean Prod* 174:527–537 . doi: 10.1016/j.jclepro.2017.10.245
- Keyes S, Tyedmers P, Beazley K (2015) Evaluating the environmental impacts of conventional and organic apple production in Nova Scotia, Canada, through life cycle assessment. *J Clean Prod* 104:40–51 . doi: 10.1016/j.jclepro.2015.05.037
- Khanali M, Movahedi M, Yousefi M, et al (2016) Investigating energy balance and carbon footprint in saffron cultivation - A case study in Iran. *J Clean Prod* 115:162–171 . doi: 10.1016/j.jclepro.2015.12.013

- Kikuchi Y, Kanematsu Y, Yoshikawa N, et al (2018) Environmental and resource use analysis of plant factories with energy technology options: A case study in Japan. *J Clean Prod* 186:703–717 . doi: 10.1016/j.jclepro.2018.03.110
- Knudsen MT, Meyer-Aurich A, Olesen JE, et al (2014) Carbon footprints of crops from organic and conventional arable crop rotations - Using a life cycle assessment approach. *J Clean Prod* 64:609–618 . doi: 10.1016/j.jclepro.2013.07.009
- Kulak M, Nemecek T, Frossard E, et al (2015) Life cycle assessment of bread from several alternative food networks in Europe. *J Clean Prod* 90:104–113 . doi: 10.1016/j.jclepro.2014.10.060
- Larsen JD, Hoeve M ten, Nielsen S, Scheutz C (2018) Life cycle assessment comparing the treatment of surplus activated sludge in a sludge treatment reed bed system with mechanical treatment on centrifuge. *J Clean Prod* 185:148–156 . doi: 10.1016/j.jclepro.2018.02.193
- Li J, Zhang Y, Shao S, Zhang S (2015) Comparative life cycle assessment of conventional and new fused magnesia production. *J Clean Prod* 91:170–179 . doi: 10.1016/j.jclepro.2014.12.043
- Li X, Bai R, McKechnie J (2016a) Environmental and financial performance of mechanical recycling of carbon fibre reinforced polymers and comparison with conventional disposal routes. *J Clean Prod* 127:451–460 . doi: 10.1016/j.jclepro.2016.03.139
- Liu W, Sang J, Chen L, et al (2015) Life cycle assessment of lead-acid batteries used in electric bicycles in China. *J Clean Prod* 108:1149–1156 . doi: 10.1016/j.jclepro.2015.07.026
- Low JSC, Tjandra TB, Lu WF, Lee HM (2016) Adaptation of the Product Structure-based Integrated Life cycle Analysis (PSILA) technique for carbon footprint modelling and analysis of closed-loop production systems. *J Clean Prod* 120:105–123 . doi: 10.1016/j.jclepro.2015.09.095
- Morandi F, Perrin A, Østergård H (2016) Miscanthus as energy crop: Environmental assessment of a miscanthus biomass production case study in France. *J Clean Prod* 137:313–321 . doi: 10.1016/j.jclepro.2016.07.042
- Nikkhah A, Khojastehpour M, Abbaspour-Fard MH (2018) Hybrid landfill gas emissions modeling and life cycle assessment for determining the appropriate period to install biogas system. *J Clean Prod* 185:772–780 . doi: 10.1016/j.jclepro.2018.03.080
- Oyarzo J, Peuportier B (2014) Life cycle assessment model applied to housing in Chile. *J Clean Prod* 69:109–116 . doi: 10.1016/j.jclepro.2014.01.090
- Peng S, Li T, Dong M, et al (2016) Life cycle assessment of a large-scale centrifugal compressor: A case study in China. *J Clean Prod* 139:810–820 . doi: 10.1016/j.jclepro.2016.08.105
- Rahman SMM, Handler RM, Mayer AL (2016) Life cycle assessment of steel in the ship recycling industry in Bangladesh. *J Clean Prod* 135:963–971 . doi: 10.1016/j.jclepro.2016.07.014
- Sanyé-Mengual E, Martínez-Blanco J, Finkbeiner M, et al (2018) Urban horticulture in retail parks: Environmental assessment of the potential implementation of rooftop greenhouses in European and South American cities. *J Clean Prod* 172:3081–3091 . doi: 10.1016/j.jclepro.2017.11.103
- Soltani A, Sadiq R, Hewage K (2016) Selecting sustainable waste-to-energy technologies for municipal solid waste treatment: A game theory approach for group decision-making. *J Clean Prod* 113:388–399 . doi: 10.1016/j.jclepro.2015.12.041
- Subramaniam V, Hashim Z (2018) Charting the water footprint for Malaysian crude palm oil. *J Clean Prod* 178:675–687 . doi: 10.1016/j.jclepro.2018.01.061
- Trudewind CA, Schreiber A, Haumann D (2014a) Photocatalytic methanol and methane production using captured CO<sub>2</sub> from coal-fired power plants. Part i - A Life Cycle Assessment. *J Clean Prod* 70:27–37 . doi: 10.1016/j.jclepro.2014.02.014
- Wang E, Yuan C (2014) A hybrid life cycle assessment of atomic layer deposition process. *J Clean Prod* 74:145–154 . doi: 10.1016/j.jclepro.2014.03.043
- Wang JJ, Tingley DD, Mayfield M, Wang YF (2018) Life cycle impact comparison of different concrete floor slabs considering uncertainty and sensitivity analysis. *J Clean Prod* 189:374–385 . doi: 10.1016/j.jclepro.2018.04.094
- Winter M, Ibbotson S, Kara S, Herrmann C (2015) Life cycle assessment of cubic boron nitride grinding wheels. *J Clean Prod* 107:707–721 . doi: 10.1016/j.jclepro.2015.05.088

Yang J, Chang Y, Zhang L, et al (2018) The life-cycle energy and environmental emissions of a typical offshore wind farm in China. *J Clean Prod* 180:316–324 . doi: 10.1016/j.jclepro.2018.01.082

Zhang L, Mabee WE (2016) Comparative study on the life-cycle greenhouse gas emissions of the utilization of potential low carbon fuels for the cement industry. *J Clean Prod* 122:102–112 . doi: 10.1016/j.jclepro.2016.02.019

### **2.1.1g Fuzzy logic**

Agarski B, Budak I, Vukelic D, Hodolic J (2016) Fuzzy multi-criteria-based impact category weighting in life cycle assessment. *J Clean Prod* 112:3256–3266 . doi: 10.1016/j.jclepro.2015.09.077

Bai SW, Zhang JS, Wang Z (2015) A methodology for evaluating cleaner production in the stone processing industry: Case study of a Shandong stone processing firm. *J Clean Prod* 102:461–476 . doi: 10.1016/j.jclepro.2015.04.139

Egilmez G, Gumus S, Kucukvar M, Tatari O (2016) A fuzzy data envelopment analysis framework for dealing with uncertainty impacts of input-output life cycle assessment models on eco-efficiency assessment. *J Clean Prod* 129:622–636 . doi: 10.1016/j.jclepro.2016.03.111

### **2.1.1h Bayesian**

None.

### **2.1.1i Regression**

Li Y, Hou X, Zhang W, et al (2018) Integration of life cycle assessment and statistical analysis to understand the influence of rainfall on WWTPs with combined sewer systems. *J Clean Prod* 172:2521–2530 . doi: 10.1016/j.jclepro.2017.11.158

### **2.1.1j Not indicated/other**

Anifowose B, Odubela M (2015) Methane emissions from oil and gas transport facilities - Exploring innovative ways to mitigate environmental consequences. *J Clean Prod* 92:121–133 . doi: 10.1016/j.jclepro.2014.12.066

Brito De Figueirêdo MC, Potting J, Lopes Serrano LA, et al (2016) Environmental assessment of tropical perennial crops: The case of the Brazilian cashew. *J Clean Prod* 112:131–140 . doi: 10.1016/j.jclepro.2015.05.134

Font Vivanco D, Kemp R, Van Der Voet E (2015) The relativity of eco-innovation: environmental rebound effects from past transport innovations in Europe. *J Clean Prod* 101:71–85 . doi: 10.1016/j.jclepro.2015.04.019

Gu Y, Xu J, Keller AA, et al (2015) Calculation of water footprint of the iron and steel industry: A case study in Eastern China. *J Clean Prod* 92:274–281 . doi: 10.1016/j.jclepro.2014.12.094

Havukainen J, Nguyen MT, Väisänen S, Horttanainen M (2018) Life cycle assessment of small-scale combined heat and power plant: Environmental impacts of different forest biofuels and replacing district heat produced from natural gas. *J Clean Prod* 172:837–846 . doi: 10.1016/j.jclepro.2017.10.241

Hernández-Padilla F, Margni M, Noyola A, et al (2017) Assessing wastewater treatment in Latin America and the Caribbean: Enhancing life cycle assessment interpretation by regionalization and impact assessment sensibility. *J Clean Prod* 142:2140–2153 . doi: 10.1016/j.jclepro.2016.11.068

Husgafvel R, Vanhatalo K, Rodriguez-Chiang L, et al (2016) Comparative global warming potential assessment of eight microcrystalline cellulose manufacturing systems. *J Clean Prod* 126:620–629 . doi: 10.1016/j.jclepro.2016.03.091

Kajaste R, Hurme M (2016) Cement industry greenhouse gas emissions - Management options and abatement cost. *J Clean Prod* 112:4041–4052 . doi: 10.1016/j.jclepro.2015.07.055

Liu Y, Wang Y, Li D (2017) Estimation and uncertainty analysis on carbon dioxide emissions from construction phase of real highway projects in China. *J Clean Prod* 144:337–346 . doi: 10.1016/j.jclepro.2017.01.015

- Paraskevas D, Kellens K, Dewulf W, Duflou JR (2015) Environmental modelling of aluminium recycling: A Life Cycle Assessment tool for sustainable metal management. *J Clean Prod* 105:357–370 . doi: 10.1016/j.jclepro.2014.09.102
- Rossi V, Cleeve-Edwards N, Lundquist L, et al (2015) Life cycle assessment of end-of-life options for two biodegradable packaging materials: Sound application of the European waste hierarchy. *J Clean Prod* 86:132–145 . doi: 10.1016/j.jclepro.2014.08.049
- Sagastume Gutierrez A, Cabello Eras JJ, Billen P, Vandecasteele C (2016) Environmental assessment of pig production in Cienfuegos, Cuba: Alternatives for manure management. *J Clean Prod* 112:2518–2528 . doi: 10.1016/j.jclepro.2015.09.082
- Wang H, Thakkar C, Chen X, Murrell S (2016) Life-cycle assessment of airport pavement design alternatives for energy and environmental impacts. *J Clean Prod* 133:163–171 . doi: 10.1016/j.jclepro.2016.05.090
- Wu L, Mao XQ, Zeng A (2015) Carbon footprint accounting in support of city water supply infrastructure siting decision making : a case study in Ningbo , China. *J Clean Prod* 103:737–746 . doi: 10.1016/j.jclepro.2015.01.060

### **2.1.2 Uncertainty analysis reported as not performed**

- Bartocci P, Fantozzi P, Fantozzi F (2017) Environmental impact of Sagrantino and Grechetto grapes cultivation for wine and vinegar production in central Italy. *J Clean Prod* 140:569–580 . doi: 10.1016/j.jclepro.2016.04.090
- Buratti C, Barbanera M, Testarmata F, Fantozzi F (2015) Life Cycle Assessment of organic waste management strategies: An Italian case study. *J Clean Prod* 89:125–136 . doi: 10.1016/j.jclepro.2014.11.012
- Clarke J, Heinonen J, Ottelin J (2017) Emissions in a decarbonised economy? Global lessons from a carbon footprint analysis of Iceland. *J Clean Prod* 166:1175–1186 . doi: 10.1016/j.jclepro.2017.08.108
- Fang K, Heijungs R (2015) Investigating the inventory and characterization aspects of footprinting methods: Lessons for the classification and integration of footprints. *J Clean Prod* 108:1028–1036 . doi: 10.1016/j.jclepro.2015.06.086
- Foulet A, Birot M, Sonnemann G, Deleuze H (2015) Life cycle assessment of producing emulsion-templated porous materials from Kraft black liquor - Comparison of a vegetable oil and a petrochemical solvent. *J Clean Prod* 91:180–186 . doi: 10.1016/j.jclepro.2014.12.035
- Gao H, Zhou C, Li F, et al (2017) Economic and environmental analysis of five Chinese rural toilet technologies based on the economic input–output life cycle assessment. *J Clean Prod* 163:S379–S391 . doi: 10.1016/j.jclepro.2015.12.089
- Karunathilake H, Perera P, Ruparathna R, et al (2018) Renewable energy integration into community energy systems: A case study of new urban residential development. *J Clean Prod* 173:292–307 . doi: 10.1016/j.jclepro.2016.10.067
- Lam CM, Yu IKM, Medel F, et al (2018) Life-cycle cost-benefit analysis on sustainable food waste management: The case of Hong Kong International Airport. *J Clean Prod* 187:751–762 . doi: 10.1016/j.jclepro.2018.03.160
- Leiva FJ, García J, Martínez E, et al (2017) Scenarios for the reduction of environmental impact in *Agaricus bisporus* production. *J Clean Prod* 143:200–211 . doi: 10.1016/j.jclepro.2016.12.129
- Li Y, Liu Y, Gong X, et al (2016b) Environmental impact analysis of blast furnace slag applied to ordinary Portland cement production. *J Clean Prod* 120:221–230 . doi: 10.1016/j.jclepro.2015.12.071
- Liikanen M, Havukainen J, Hupponen M, Horttanainen M (2017) Influence of different factors in the life cycle assessment of mixed municipal solid waste management systems – A comparison of case studies in Finland and China. *J Clean Prod* 154:389–400 . doi: 10.1016/j.jclepro.2017.04.023
- Lu B, Liu J, Yang J, Li B (2015) The environmental impact of technology innovation on WEEE management by Multi-Life Cycle Assessment. *J Clean Prod* 89:148–158 . doi: 10.1016/j.jclepro.2014.11.004
- Mery Y, Tiruta-Barna L, Baudin I, et al (2014) Formalization of a technical procedure for process ecodesign dedicated to drinking water treatment plants. *J Clean Prod* 68:16–24 . doi: 10.1016/j.jclepro.2014.01.011
- Pelletier N (2017) Life cycle assessment of Canadian egg products, with differentiation by hen housing system type. *J Clean Prod* 152:167–180 . doi: 10.1016/j.jclepro.2017.03.050

- Saarinen M, Fogelholm M, Tahvonon R, Kurppa S (2017) Taking nutrition into account within the life cycle assessment of food products. *J Clean Prod* 149:828–844 . doi: 10.1016/j.jclepro.2017.02.062
- Schaubroeck T, Ceuppens S, Luong AD, et al (2018) A pragmatic framework to score and inform about the environmental sustainability and nutritional profile of canteen meals, a case study on a university canteen. *J Clean Prod* 187:672–686 . doi: 10.1016/j.jclepro.2018.03.265
- Soratana K, Rasutis D, Azarabadi H, et al (2017) Guayule as an alternative source of natural rubber: A comparative life cycle assessment with Hevea and synthetic rubber. *J Clean Prod* 159:271–280 . doi: 10.1016/j.jclepro.2017.05.070
- Swart P, Dewulf J, Biernaux A (2014) Resource demand for the production of different cathode materials for lithium ion batteries. *J Clean Prod* 84:391–399 . doi: 10.1016/j.jclepro.2014.01.056
- Webb J, Audsley E, Williams A, et al (2014) Can UK livestock production be configured to maintain production while meeting targets to reduce emissions of greenhouse gases and ammonia? *J Clean Prod* 83:204–211 . doi: 10.1016/j.jclepro.2014.06.085
- Wijayasundara M, Crawford RH, Mendis P (2017) Comparative assessment of embodied energy of recycled aggregate concrete. *J Clean Prod* 152:406–419 . doi: 10.1016/j.jclepro.2017.03.118

### **2.1.3 Uncertainty mentioned but no analysis performed**

- Agnhage T, Perwuelz A, Behary N (2017) Towards sustainable *Rubia tinctorum* L. dyeing of woven fabric: How life cycle assessment can contribute. *J Clean Prod* 141:1221–1230 . doi: 10.1016/j.jclepro.2016.09.183
- Agustí-Juan I, Müller F, Hack N, et al (2017) Potential benefits of digital fabrication for complex structures: Environmental assessment of a robotically fabricated concrete wall. *J Clean Prod* 154:330–340 . doi: 10.1016/j.jclepro.2017.04.002
- Agyekum EO, Fortuin KPJK, van der Harst E (2017) Environmental and social life cycle assessment of bamboo bicycle frames made in Ghana. *J Clean Prod* 143:1069–1080 . doi: 10.1016/j.jclepro.2016.12.012
- Agyemang M, Zhu Q, Tian Y (2016) Analysis of opportunities for greenhouse emission reduction in the global supply chains of cashew industry in West Africa. *J Clean Prod* 115:149–161 . doi: 10.1016/j.jclepro.2015.12.059
- Ahmadi A, Tiruta-Barna L (2015) A process modelling-life cycle assessment-multiobjective optimization tool for the eco-design of conventional treatment processes of potable water. *J Clean Prod* 100:116–125 . doi: 10.1016/j.jclepro.2015.03.045
- Alexiades A, Kendall A, Winans KS, Kaffka SR (2018) Sugar beet ethanol (*Beta vulgaris* L.): A promising low-carbon pathway for ethanol production in California. *J Clean Prod* 172:3907–3917 . doi: 10.1016/j.jclepro.2017.05.059
- Alhadj Ali S, Tedone L, Verdini L, De Mastro G (2017) Effect of different crop management systems on rainfed durum wheat greenhouse gas emissions and carbon footprint under Mediterranean conditions. *J Clean Prod* 140:608–621 . doi: 10.1016/j.jclepro.2016.04.135
- Amasawa E, Ihara T, Ohta T, Hanaki K (2016) Life cycle assessment of organic light emitting diode display as emerging materials and technology. *J Clean Prod* 135:1340–1350 . doi: 10.1016/j.jclepro.2016.07.025
- Ammenberg J, Baas L, Eklund M, et al (2015) Improving the CO<sub>2</sub> performance of cement, part III: The relevance of industrial symbiosis and how to measure its impact. *J Clean Prod* 98:145–155 . doi: 10.1016/j.jclepro.2014.01.086
- Andriankaja H, Vallet F, Le Duigou J, Eynard B (2015) A method to ecodesign structural parts in the transport sector based on product life cycle management. *J Clean Prod* 94:165–176 . doi: 10.1016/j.jclepro.2015.02.026
- Angelo ACM, Saraiva AB, Clímaco JCN, et al (2017) Life Cycle Assessment and Multi-criteria Decision Analysis: Selection of a strategy for domestic food waste management in Rio de Janeiro. *J Clean Prod* 143:744–756 . doi: 10.1016/j.jclepro.2016.12.049
- Arrigoni A, Pelosato R, Melià P, et al (2017) Life cycle assessment of natural building materials: the role of carbonation, mixture components and transport in the environmental impacts of hempcrete blocks. *J Clean Prod* 149:1051–1061 . doi: 10.1016/j.jclepro.2017.02.161

- Arrigoni A, Zucchinelli M, Collatina D, Dotelli G (2018) Life cycle environmental benefits of a forward-thinking design phase for buildings: the case study of a temporary pavilion built for an international exhibition. *J Clean Prod* 187:974–983 . doi: 10.1016/j.jclepro.2018.03.230
- Athanassiadis A, Christis M, Bouillard P, et al (2018) Comparing a territorial-based and a consumption-based approach to assess the local and global environmental performance of cities. *J Clean Prod* 173:112–123 . doi: 10.1016/j.jclepro.2016.10.068
- Auer J, Bey N, Schäfer JM (2017) Combined Life Cycle Assessment and Life Cycle Costing in the Eco-Care-Matrix: A case study on the performance of a modernized manufacturing system for glass containers. *J Clean Prod* 141:99–109 . doi: 10.1016/j.jclepro.2016.08.096
- Ayer NW, Dias G (2018) Supplying renewable energy for Canadian cement production: Life cycle assessment of bioenergy from forest harvest residues using mobile fast pyrolysis units. *J Clean Prod* 175:237–250 . doi: 10.1016/j.jclepro.2017.12.040
- Ayoub N, Musharavati F, Pokharel S, Gabbar HA (2015) Risk based life cycle assessment conceptual framework for energy supply systems in large buildings. *J Clean Prod* 107:291–309 . doi: 10.1016/j.jclepro.2015.04.075
- Azapagic A, Bore J, Cheserek B, et al (2016) The global warming potential of production and consumption of Kenyan tea. *J Clean Prod* 112:4031–4040 . doi: 10.1016/j.jclepro.2015.07.029
- Bai X, Ren X, Khanna NZ, et al (2018) A comparative study of a full value-chain water footprint assessment using two international standards at a large-scale hog farm in China. *J Clean Prod* 176:557–565 . doi: 10.1016/j.jclepro.2017.11.248
- Balaji K, Iniyar S, Swami M V. (2018) Exergy, economic and environmental analysis of forced circulation flat plate solar collector using heat transfer enhancer in riser tube. *J Clean Prod* 171:1118–1127 . doi: 10.1016/j.jclepro.2017.10.093
- Baldassarri C, Mathieux F, Ardente F, et al (2016) Integration of environmental aspects into R&D inter-organizational projects management: Application of a life cycle-based method to the development of innovative windows. *J Clean Prod* 112:3388–3401 . doi: 10.1016/j.jclepro.2015.09.044
- Barrera EL, Rosa E, Spanjers H, et al (2016) A comparative assessment of anaerobic digestion power plants as alternative to lagoons for vinasse treatment: life cycle assessment and exergy analysis. *J Clean Prod* 113:459–471 . doi: 10.1016/j.jclepro.2015.11.095
- Basili M, Rossi MA (2018) Brassica carinata-derived biodiesel production: economics, sustainability and policies. The Italian case. *J Clean Prod* 191:40–47 . doi: 10.1016/j.jclepro.2018.03.306
- Batalla I, Knudsen MT, Mogensen L, et al (2015) Carbon footprint of milk from sheep farming systems in Northern Spain including soil carbon sequestration in grasslands. *J Clean Prod* 104:121–129 . doi: 10.1016/j.jclepro.2015.05.043
- Bawden KR, Williams ED, Babbitt CW (2016) Mapping product knowledge to life cycle inventory bounds: A case study of steel manufacturing. *J Clean Prod* 113:557–564 . doi: 10.1016/j.jclepro.2015.10.014
- Beccaro GL, Cerutti AK, Vandecasteele I, et al (2014) Assessing environmental impacts of nursery production: Methodological issues and results from a case study in Italy. *J Clean Prod* 80:159–169 . doi: 10.1016/j.jclepro.2014.05.062
- Bekker ACM, Verlinden JC (2018) Life cycle assessment of wire + arc additive manufacturing compared to green sand casting and CNC milling in stainless steel. *J Clean Prod* 177:438–447 . doi: 10.1016/j.jclepro.2017.12.148
- Belalcázar-Saldarriaga A, Prato-García D, Vasquez-Medrano R (2018) Photo-Fenton processes in raceway reactors: Technical, economic, and environmental implications during treatment of colored wastewaters. *J Clean Prod* 182:818–829 . doi: 10.1016/j.jclepro.2018.02.058
- Belboom S, Szöcs C, Léonard A (2015) Environmental impacts of phosphoric acid production using di-hemihydrate process: A Belgian case study. *J Clean Prod* 108:978–986 . doi: 10.1016/j.jclepro.2015.06.141
- Bellon-Maurel V, Peters GM, Clermidy S, et al (2015) Streamlining life cycle inventory data generation in agriculture using traceability data and information and communication technologies e part II: Application to viticulture. *J Clean Prod* 87:119–129 . doi: 10.1016/j.jclepro.2014.09.095



- Ben Aoun W, El Akkari M, Flénet F, et al (2016) Recommended fertilization practices improve the environmental performance of biodiesel from winter oilseed rape in France. *J Clean Prod* 139:242–249 . doi: 10.1016/j.jclepro.2016.07.058
- Benavente V, Fullana A, Berge ND (2017) Life cycle analysis of hydrothermal carbonization of olive mill waste: Comparison with current management approaches. *J Clean Prod* 142:2637–2648 . doi: 10.1016/j.jclepro.2016.11.013
- Benis K, Ferrão P (2017) Potential mitigation of the environmental impacts of food systems through urban and peri-urban agriculture (UPA) – a life cycle assessment approach. *J Clean Prod* 140:784–795 . doi: 10.1016/j.jclepro.2016.05.176
- Beylot A, Villeneuve J (2017) Accounting for the environmental impacts of sulfidic tailings storage in the Life Cycle Assessment of copper production: A case study. *J Clean Prod* 153:139–145 . doi: 10.1016/j.jclepro.2017.03.129
- Bierer A, Götze U, Meynerts L, Sygulla R (2015) Integrating life cycle costing and life cycle assessment using extended material flow cost accounting. *J Clean Prod* 108:1289–1301 . doi: 10.1016/j.jclepro.2014.08.036
- Blankendaal T, Schuur P, Voordijk H (2014) Reducing the environmental impact of concrete and asphalt: A scenario approach. *J Clean Prod* 66:27–36 . doi: 10.1016/j.jclepro.2013.10.012
- Bobba S, Deorsola FA, Blengini GA, Fino D (2016) LCA of tungsten disulphide (WS<sub>2</sub>) nano-particles synthesis: state of art and from-cradle-to-gate LCA. *J Clean Prod* 139:1478–1484 . doi: 10.1016/j.jclepro.2016.07.091
- Bonaguro JE, Coletto L, Zanin G (2017) Environmental and agronomic performance of fresh rice hulls used as growing medium component for *Cyclamen persicum* L. pot plants. *J Clean Prod* 142:2125–2132 . doi: 10.1016/j.jclepro.2016.11.071
- Borghini G, Pantini S, Rigamonti L (2018) Life cycle assessment of non-hazardous Construction and Demolition Waste (CDW) management in Lombardy Region (Italy). *J Clean Prod* 184:815–825 . doi: 10.1016/j.jclepro.2018.02.287
- Bornschlegl M, Bregulla M, Franke J (2016) Methods-Energy Measurement – An approach for sustainable energy planning of manufacturing technologies. *J Clean Prod* 135:644–656 . doi: 10.1016/j.jclepro.2016.06.059
- Broeren MLM, Dellaert SNC, Cok B, et al (2017) Life cycle assessment of sisal fibre – Exploring how local practices can influence environmental performance. *J Clean Prod* 149:818–827 . doi: 10.1016/j.jclepro.2017.02.073
- Broeren MLM, Molenveld K, van den Oever MJA, et al (2016) Early-stage sustainability assessment to assist with material selection: a case study for biobased printer panels. *J Clean Prod* 135:30–41 . doi: 10.1016/j.jclepro.2016.05.159
- Brunet R, Guillén-Gosálbez G, Jiménez L (2014) Combined simulation-optimization methodology to reduce the environmental impact of pharmaceutical processes: Application to the production of Penicillin v. *J Clean Prod* 76:55–63 . doi: 10.1016/j.jclepro.2014.02.012
- Bueno C, Hauschild MZ, Rossignolo JA, et al (2016) Sensitivity analysis of the use of Life Cycle Impact Assessment methods: A case study on building materials. *J Clean Prod* 112:2208–2220 . doi: 10.1016/j.jclepro.2015.10.006
- Caldeira-Pires A, Benoist A, Luz SM da, et al (2018) Implications of removing straw from soil for bioenergy: An LCA of ethanol production using total sugarcane biomass. *J Clean Prod* 181:249–259 . doi: 10.1016/j.jclepro.2018.01.119
- Cao V, Margni M, Favis BD, Deschênes L (2015) Aggregated indicator to assess land use impacts in life cycle assessment (LCA) based on the economic value of ecosystem services. *J Clean Prod* 94:56–66 . doi: 10.1016/j.jclepro.2015.01.041
- Capitanescu F, Marvuglia A, Navarrete Gutiérrez T, Benetto E (2017) Multi-stage farm management optimization under environmental and crop rotation constraints. *J Clean Prod* 147:197–205 . doi: 10.1016/j.jclepro.2017.01.076
- Caputo P, Clementi M, Ducoli C, et al (2017) Food Chain Evaluator, a tool for analyzing the impacts and designing scenarios for the institutional catering in Lombardy (Italy). *J Clean Prod* 140:1014–1026 . doi: 10.1016/j.jclepro.2016.06.084

- Carrasquer B, Uche J, Martínez-Gracia A (2017) A new indicator to estimate the efficiency of water and energy use in agro-industries. *J Clean Prod* 143:462–473 . doi: 10.1016/j.jclepro.2016.12.088
- Casas-Ledón Y, Spauco F, Arteaga-Pérez LE (2017) Exergoenvironmental analysis of a waste-based Integrated Combined Cycle (WICC) for heat and power production. *J Clean Prod* 164:187–197 . doi: 10.1016/j.jclepro.2017.06.211
- Castellani V, Sala S, Benini L (2017) Hotspots analysis and critical interpretation of food life cycle assessment studies for selecting eco-innovation options and for policy support. *J Clean Prod* 140:556–568 . doi: 10.1016/j.jclepro.2016.05.078
- Celik I, Song Z, Phillips AB, et al (2018) Life cycle analysis of metals in emerging photovoltaic (PV) technologies: A modeling approach to estimate use phase leaching. *J Clean Prod* 186:632–639 . doi: 10.1016/j.jclepro.2018.03.063
- Chang J, Lee W, Yoon S (2017a) Energy consumptions and associated greenhouse gas emissions in operation phases of urban water reuse systems in Korea. *J Clean Prod* 141:728–736 . doi: 10.1016/j.jclepro.2016.09.131
- Chang Y, Gu Y, Zhang L, et al (2017b) Energy and environmental implications of using geothermal heat pumps in buildings: An example from north China. *J Clean Prod* 167:484–492 . doi: 10.1016/j.jclepro.2017.08.199
- Chang Y, Huang Z, Ries RJ, Masanet E (2016) The embodied air pollutant emissions and water footprints of buildings in China: A quantification using disaggregated input-output life cycle inventory model. *J Clean Prod* 113:274–284 . doi: 10.1016/j.jclepro.2015.11.014
- Chen DM, Tucker B, Badami MG, et al (2016) A multi-dimensional metric for facilitating sustainable food choices in campus cafeterias. *J Clean Prod* 135:1351–1362 . doi: 10.1016/j.jclepro.2016.06.143
- Chen S, Fu X, Chu M, et al (2015) Life cycle assessment of the comprehensive utilisation of vanadium titanomagnetite. *J Clean Prod* 101:122–128 . doi: 10.1016/j.jclepro.2015.03.076
- Chen W, Holden NM (2018) Tiered life cycle sustainability assessment applied to a grazing dairy farm. *J Clean Prod* 172:1169–1179 . doi: 10.1016/j.jclepro.2017.10.264
- Chen X, Wang H (2018) Life cycle assessment of asphalt pavement recycling for greenhouse gas emission with temporal aspect. *J Clean Prod* 187:148–157 . doi: 10.1016/j.jclepro.2018.03.207
- Chiang YH, Li J, Zhou L, et al (2015) The nexus among employment opportunities, life-cycle costs, and carbon emissions: A case study of sustainable building maintenance in Hong Kong. *J Clean Prod* 109:326–335 . doi: 10.1016/j.jclepro.2014.07.069
- Chobtang J, McLaren SJ, Ledgard SF, Donaghy DJ (2017) Environmental trade-offs associated with intensification methods in a pasture-based dairy system using prospective attributional Life Cycle Assessment. *J Clean Prod* 143:1302–1312 . doi: 10.1016/j.jclepro.2016.11.134
- Chu Y, Xie L, Yuan Z (2018) Composition and spatiotemporal distribution of the agro-ecosystem carbon footprint: A case study in Hebei Province, north China. *J Clean Prod* 190:838–846 . doi: 10.1016/j.jclepro.2018.04.111
- Ciacchi L, Eckelman MJ, Passarini F, et al (2014) Historical evolution of greenhouse gas emissions from aluminum production at a country level. *J Clean Prod* 84:540–549 . doi: 10.1016/j.jclepro.2014.03.062
- Cimini A, Moresi M (2016) Carbon footprint of a pale lager packed in different formats: Assessment and sensitivity analysis based on transparent data. *J Clean Prod* 112:4196–4213 . doi: 10.1016/j.jclepro.2015.06.063
- Condeixa K, Haddad A, Boer D (2017) Material flow analysis of the residential building stock at the city of Rio de Janeiro. *J Clean Prod* 149:1249–1267 . doi: 10.1016/j.jclepro.2017.02.080
- Corcelli F, Ripa M, Ulgiati S (2017) End-of-life treatment of crystalline silicon photovoltaic panels. An emergy-based case study. *J Clean Prod* 161:1129–1142 . doi: 10.1016/j.jclepro.2017.05.031
- Cosme N, Niero M (2017) Modelling the influence of changing climate in present and future marine eutrophication impacts from spring barley production. *J Clean Prod* 140:537–546 . doi: 10.1016/j.jclepro.2016.06.077
- Crossin E (2015) The greenhouse gas implications of using ground granulated blast furnace slag as a cement substitute. *J Clean Prod* 95:101–108 . doi: 10.1016/j.jclepro.2015.02.082

- Cucinotta F, Guglielmino E, Sfravara F (2017) Life cycle assessment in yacht industry: A case study of comparison between hand lay-up and vacuum infusion. *J Clean Prod* 142:3822–3833 . doi: 10.1016/j.jclepro.2016.10.080
- Dahmen J, Kim J, Ouellet-Plamondon CM (2018) Life cycle assessment of emergent masonry blocks. *J Clean Prod* 171:1622–1637 . doi: 10.1016/j.jclepro.2017.10.044
- Daneshi A, Esmaili-Sari A, Daneshi M, Baumann H (2014) Greenhouse gas emissions of packaged fluid milk production in Tehran. *J Clean Prod* 80:150–158 . doi: 10.1016/j.jclepro.2014.05.057
- Danilecki K, Mrozik M, Smurawski P (2017) Changes in the environmental profile of a popular passenger car over the last 30 years – Results of a simplified LCA study. *J Clean Prod* 141:208–218 . doi: 10.1016/j.jclepro.2016.09.050
- De Falco M, Capocelli M, Losito G, Piemonte V (2017) LCA perspective to assess the environmental impact of a novel PCM-based cold storage unit for the civil air conditioning. *J Clean Prod* 165:697–704 . doi: 10.1016/j.jclepro.2017.07.153
- De Feo G, Ferrara C (2017) A procedure for evaluating the most environmentally sound alternative between two on-site small-scale wastewater treatment systems. *J Clean Prod* 164:124–136 . doi: 10.1016/j.jclepro.2017.06.205
- de Figueiredo EB, Jayasundara S, de Oliveira Bordonal R, et al (2017) Greenhouse gas balance and carbon footprint of beef cattle in three contrasting pasture-management systems in Brazil. *J Clean Prod* 142:420–431 . doi: 10.1016/j.jclepro.2016.03.132
- De Luca AI, Falcone G, Stillitano T, et al (2018) Evaluation of sustainable innovations in olive growing systems: A Life Cycle Sustainability Assessment case study in southern Italy. *J Clean Prod* 171:1187–1202 . doi: 10.1016/j.jclepro.2017.10.119
- Del Pero F, Delogu M, Pierini M, Bonaffini D (2015) Life Cycle Assessment of a heavy metro train. *J Clean Prod* 87:787–799 . doi: 10.1016/j.jclepro.2014.09.023
- Demeke B, Ingwersen WW, Weisbrod A V., et al (2018) Green Net Value Added as a sustainability metric based on life cycle assessment: An application to Bounty® paper towel. *J Clean Prod* 170:742–752 . doi: 10.1016/j.jclepro.2017.08.246
- Demertzi M, Silva RP, Neto B, et al (2016) Cork stoppers supply chain: Potential scenarios for environmental impact reduction. *J Clean Prod* 112:1985–1994 . doi: 10.1016/j.jclepro.2015.02.072
- Dentoni D, Bitzer V (2015) The role(s) of universities in dealing with global wicked problems through multi-stakeholder initiatives. *J Clean Prod* 106:68–78 . doi: 10.1016/j.jclepro.2014.09.050
- Depping V, Grunow M, van Middelaar C, Dimpler J (2017) Integrating environmental impact assessment into new product development and processing-technology selection: Milk concentrates as substitutes for milk powders. *J Clean Prod* 149:1–10 . doi: 10.1016/j.jclepro.2017.02.070
- Deviatkin I, Havukainen J, Horttanainen M (2017) Comparative life cycle assessment of thermal residue recycling on a regional scale: A case study of South-East Finland. *J Clean Prod* 149:275–289 . doi: 10.1016/j.jclepro.2017.02.087
- Devkota J, Schlachter H, Apul D (2015) Life cycle based evaluation of harvested rainwater use in toilets and for irrigation. *J Clean Prod* 95:311–321 . doi: 10.1016/j.jclepro.2015.02.021
- Devkota JP, Burian SJ, Tavakol-Davani H, Apul DS (2017) Introducing demand to supply ratio as a new metric for understanding life cycle greenhouse gas (GHG) emissions from rainwater harvesting systems. *J Clean Prod* 163:274–284 . doi: 10.1016/j.jclepro.2015.10.073
- Di Iaconi C, Del Moro G, Bertanza G, et al (2017) Upgrading small wastewater treatment plants with the sequencing batch biofilter granular reactor technology: Techno-economic and environmental assessment. *J Clean Prod* 148:606–615 . doi: 10.1016/j.jclepro.2017.02.034
- Djekic I, Smigic N, Glavan R, et al (2018) Transportation sustainability index in dairy industry – Fuzzy logic approach. *J Clean Prod* 180:107–115 . doi: 10.1016/j.jclepro.2018.01.185
- Dong L, Fujita T, Dai M, et al (2016) Towards preventative eco-industrial development: An industrial and urban symbiosis case in one typical industrial city in China. *J Clean Prod* 114:387–400 . doi: 10.1016/j.jclepro.2015.05.015

- Dong YH, Ng ST, Kwan AHK, Wu SK (2015) Substituting local data for overseas life cycle inventories - A case study of concrete products in Hong Kong. *J Clean Prod* 87:414–422 . doi: 10.1016/j.jclepro.2014.10.005
- Dunuwila P, Rodrigo VHL, Goto N (2018) Financial and environmental sustainability in manufacturing of crepe rubber in terms of material flow analysis, material flow cost accounting and life cycle assessment. *J Clean Prod* 182:587–599 . doi: 10.1016/j.jclepro.2018.01.202
- Eriksson M, Strid I, Hansson PA (2015) Carbon footprint of food waste management options in the waste hierarchy - A Swedish case study. *J Clean Prod* 93:115–125 . doi: 10.1016/j.jclepro.2015.01.026
- Eriksson O, Jonsson D, Hillman K (2016) Life cycle assessment of Swedish single malt whisky. *J Clean Prod* 112:229–237 . doi: 10.1016/j.jclepro.2015.07.050
- Esteves EMM, Esteves VPP, Bungenstab DJ, et al (2018) Greenhouse gas emissions related to biodiesel from traditional soybean farming compared to integrated crop-livestock systems. *J Clean Prod* 179:81–92 . doi: 10.1016/j.jclepro.2017.12.262
- Evangelisti S, Tagliaferri C, Brett DJL, Lettieri P (2017) Life cycle assessment of a polymer electrolyte membrane fuel cell system for passenger vehicles. *J Clean Prod* 142:4339–4355 . doi: 10.1016/j.jclepro.2016.11.159
- Ewertowska A, Galán-Martín A, Guillén-Gosálbez G, et al (2016) Assessment of the environmental efficiency of the electricity mix of the top European economies via data envelopment analysis. *J Clean Prod* 116:13–22 . doi: 10.1016/j.jclepro.2015.11.100
- Fan W, Dong X, Wei H, et al (2018) Is it true that the longer the extended industrial chain, the better the circular agriculture? A case study of circular agriculture industry company in Fuqing, Fujian. *J Clean Prod* 189:718–728 . doi: 10.1016/j.jclepro.2018.04.119
- Fantin V, Righi S, Rondini I, Masoni P (2017) Environmental assessment of wheat and maize production in an Italian farmers' cooperative. *J Clean Prod* 140:631–643 . doi: 10.1016/j.jclepro.2016.06.136
- Fargnoli M, Costantino F, Di Gravio G, Tronci M (2018) Product service-systems implementation: A customized framework to enhance sustainability and customer satisfaction. *J Clean Prod* 188:387–401 . doi: 10.1016/j.jclepro.2018.03.315
- Fathollahi H, Mousavi-Avval SH, Akram A, Rafiee S (2018) Comparative energy, economic and environmental analyses of forage production systems for dairy farming. *J Clean Prod* 182:852–862 . doi: 10.1016/j.jclepro.2018.02.073
- Feijoo S, González-García S, Moldes-Diz Y, et al (2017) Comparative life cycle assessment of different synthesis routes of magnetic nanoparticles. *J Clean Prod* 143:528–538 . doi: 10.1016/j.jclepro.2016.12.079
- Fernández-Sánchez G, Berzosa Á, Barandica JM, et al (2015) Opportunities for GHG emissions reduction in road projects: A comparative evaluation of emissions scenarios using CO2NSTRUCT. *J Clean Prod* 104:156–167 . doi: 10.1016/j.jclepro.2015.05.032
- Ferreira C, Freire F, Ribeiro J (2015) Life-cycle assessment of a civil explosive. *J Clean Prod* 89:159–164 . doi: 10.1016/j.jclepro.2014.11.027
- Ferreira S, Cabral M, Da Cruz NF, Marques RC (2014) Economic and environmental impacts of the recycling system in Portugal. *J Clean Prod* 79:219–230 . doi: 10.1016/j.jclepro.2014.05.026
- Ferreiro-Cabello J, Fraile-Garcia E, Martinez de Pison Ascacibar E, Martinez de Pison Ascacibar FJ (2016) Minimizing greenhouse gas emissions and costs for structures with flat slabs. *J Clean Prod* 137:922–930 . doi: 10.1016/j.jclepro.2016.07.153
- Fiore A, Lardo E, Montanaro G, et al (2018) Mitigation of global warming impact of fresh fruit production through climate smart management. *J Clean Prod* 172:3634–3643 . doi: 10.1016/j.jclepro.2017.08.062
- Florindo TJ, de Medeiros Florindo GIB, Talamini E, et al (2017) Carbon footprint and Life Cycle Costing of beef cattle in the Brazilian midwest. *J Clean Prod* 147:119–129 . doi: 10.1016/j.jclepro.2017.01.021
- Foster C, Guében C, Holmes M, et al (2014) The environmental effects of seasonal food purchase: A raspberry case study. *J Clean Prod* 73:269–274 . doi: 10.1016/j.jclepro.2013.12.077
- Foteinis S, Borthwick AGL, Frontistis Z, et al (2018) Environmental sustainability of light-driven processes for wastewater treatment applications. *J Clean Prod* 182:8–15 . doi: 10.1016/j.jclepro.2018.02.038
- Fozer D, Sziraky FZ, Racz L, et al (2017) Life cycle, PESTLE and Multi-Criteria Decision Analysis of CCS process alternatives. *J Clean Prod* 147:75–85 . doi: 10.1016/j.jclepro.2017.01.056

- Fréon P, Durand H, Avadí A, et al (2017) Life cycle assessment of three Peruvian fishmeal plants: Toward a cleaner production. *J Clean Prod* 145:50–63 . doi: 10.1016/j.jclepro.2017.01.036
- Friedrich E, Trois C (2016) Current and future greenhouse gas (GHG) emissions from the management of municipal solid waste in the eThekweni Municipality - South Africa. *J Clean Prod* 112:4071–4083 . doi: 10.1016/j.jclepro.2015.05.118
- Fusi A, González-García S, Moreira MT, et al (2017) Rice fertilised with urban sewage sludge and possible mitigation strategies: an environmental assessment. *J Clean Prod* 140:914–923 . doi: 10.1016/j.jclepro.2016.04.089
- Gabriel CA, Bortsie-Aryee NA, Apparicio-Farrell N, Farrell E (2018) How supply chain choices affect the life cycle impacts of medical products. *J Clean Prod* 182:1095–1106 . doi: 10.1016/j.jclepro.2018.02.107
- Galán-Martín Á, Vaskan P, Antón A, et al (2017) Multi-objective optimization of rainfed and irrigated agricultural areas considering production and environmental criteria: a case study of wheat production in Spain. *J Clean Prod* 140:816–830 . doi: 10.1016/j.jclepro.2016.06.099
- Gan VJL, Chan CM, Tse KT, et al (2017) A comparative analysis of embodied carbon in high-rise buildings regarding different design parameters. *J Clean Prod* 161:663–675 . doi: 10.1016/j.jclepro.2017.05.156
- Gao Q, Lizarazo-Adarme J, Paul BK, Haapala KR (2016a) An economic and environmental assessment model for microchannel device manufacturing: Part 1 - Methodology. *J Clean Prod* 120:135–145 . doi: 10.1016/j.jclepro.2015.04.142
- Gao Q, Lizarazo-Adarme J, Paul BK, Haapala KR (2016b) An economic and environmental assessment model for microchannel device manufacturing: Part 2 - Application. *J Clean Prod* 120:146–156 . doi: 10.1016/j.jclepro.2015.04.142
- Garcez MR, Rohden AB, Graupner de Godoy LG (2018) The role of concrete compressive strength on the service life and life cycle of a RC structure: Case study. *J Clean Prod* 172:27–38 . doi: 10.1016/j.jclepro.2017.10.153
- Gavião LO, Meza LA, Lima GBA, et al (2017) Improving discrimination in efficiency analysis of bioethanol processes. *J Clean Prod* 168:1525–1532 . doi: 10.1016/j.jclepro.2017.06.020
- Gear M, Sadhukhan J, Thorpe R, et al (2018) A life cycle assessment data analysis toolkit for the design of novel processes – A case study for a thermal cracking process for mixed plastic waste. *J Clean Prod* 180:735–747 . doi: 10.1016/j.jclepro.2018.01.015
- George M, Bressler DC (2017) Comparative evaluation of the environmental impact of chemical methods used to enhance natural fibres for composite applications and glass fibre based composites. *J Clean Prod* 149:491–501 . doi: 10.1016/j.jclepro.2017.02.091
- Gianico A, Bertanza G, Braguglia CM, et al (2015) Upgrading a wastewater treatment plant with thermophilic digestion of thermally pre-treated secondary sludge: Techno-economic and environmental assessment. *J Clean Prod* 102:353–361 . doi: 10.1016/j.jclepro.2015.04.051
- Giuntoli J, Caserini S, Marelli L, et al (2015) Domestic heating from forest logging residues: environmental risks and benefit. *J Clean Prod* 99:206–216 . doi: 10.1016/j.jclepro.2015.03.025
- Goglio P, Smith WN, Grant BB, et al (2018) A comparison of methods to quantify greenhouse gas emissions of cropping systems in LCA. *J Clean Prod* 172:4010–4017 . doi: 10.1016/j.jclepro.2017.03.133
- Golzarpoor H, González V, Shahbazpour M, O’Sullivan M (2017) An input-output simulation model for assessing production and environmental waste in construction. *J Clean Prod* 143:1094–1104 . doi: 10.1016/j.jclepro.2016.12.010
- Gómez-Cuervo S, Alfonsín C, Hernández J, et al (2017) Diffuse methane emissions abatement by organic and inorganic packed biofilters: Assessment of operational and environmental indicators. *J Clean Prod* 143:1191–1202 . doi: 10.1016/j.jclepro.2016.11.185
- González-García S, Bonnesoeur V, Pizzi A, et al (2014a) Comparing environmental impacts of different forest management scenarios for maritime pine biomass production in France. *J Clean Prod* 64:356–367 . doi: 10.1016/j.jclepro.2013.07.040
- González-García S, Dias AC, Clermidy S, et al (2014b) Comparative environmental and energy profiles of potential bioenergy production chains in Southern Europe. *J Clean Prod* 76:42–54 . doi: 10.1016/j.jclepro.2014.04.022

- Gonzalez-Garcia S, Gullón B, Moreira MT (2018a) Environmental assessment of biorefinery processes for the valorization of lignocellulosic wastes into oligosaccharides. *J Clean Prod* 172:4066–4073 . doi: 10.1016/j.jclepro.2017.02.164
- González-García S, Lacoste C, Aicher T, et al (2016) Environmental sustainability of bark valorisation into biofoam and syngas. *J Clean Prod* 125:33–43 . doi: 10.1016/j.jclepro.2016.03.024
- Gonzalez-Garcia S, Manteiga R, Moreira MT, Feijoo G (2018b) Assessing the sustainability of Spanish cities considering environmental and socio-economic indicators. *J Clean Prod* 178:599–610 . doi: 10.1016/j.jclepro.2018.01.056
- Goronovski A, Joyce PJ, Björklund A, et al (2018) Impact assessment of enhanced exposure from Naturally Occurring Radioactive Materials (NORM) within LCA. *J Clean Prod* 172:2824–2839 . doi: 10.1016/j.jclepro.2017.11.131
- Gourdet C, Girault R, Berthault S, et al (2017) In quest of environmental hotspots of sewage sludge treatment combining anaerobic digestion and mechanical dewatering: A life cycle assessment approach. *J Clean Prod* 143:1123–1136 . doi: 10.1016/j.jclepro.2016.12.007
- Gradin KT, Poulikidou S, Björklund A, Luttrupp C (2018) Scrutinising the electric vehicle material backpack. *J Clean Prod* 172:1699–1710 . doi: 10.1016/j.jclepro.2017.12.035
- Guerci M, Bava L, Zucali M, et al (2014) Effect of summer grazing on carbon footprint of milk in Italian Alps: A sensitivity approach. *J Clean Prod* 73:236–244 . doi: 10.1016/j.jclepro.2013.11.021
- Gursel AP, Ostertag CP (2016) Impact of Singapore's importers on life-cycle assessment of concrete. *J Clean Prod* 118:140–150 . doi: 10.1016/j.jclepro.2016.01.051
- Hafizan C, Noor ZZ, Abba AH, Hussein N (2016) An alternative aggregation method for a life cycle impact assessment using an analytical hierarchy process. *J Clean Prod* 112:3244–3255 . doi: 10.1016/j.jclepro.2015.09.140
- Halloran A, Hanboonsong Y, Roos N, Bruun S (2017) Life cycle assessment of cricket farming in north-eastern Thailand. *J Clean Prod* 156:83–94 . doi: 10.1016/j.jclepro.2017.04.017
- Handler RM, Shi R, Shonnard DR (2017) Land use change implications for large-scale cultivation of algae feedstocks in the United States Gulf Coast. *J Clean Prod* 153:15–25 . doi: 10.1016/j.jclepro.2017.03.149
- Hanein T, Galvez-Martos JL, Bannerman MN (2018) Carbon footprint of calcium sulfoaluminate clinker production. *J Clean Prod* 172:2278–2287 . doi: 10.1016/j.jclepro.2017.11.183
- Hansupalak N, Piromkraipak P, Tamthirap P, et al (2016) Biogas reduces the carbon footprint of cassava starch: a comparative assessment with fuel oil. *J Clean Prod* 134:539–546 . doi: 10.1016/j.jclepro.2015.06.138
- Haque N, Norgate T (2014) The greenhouse gas footprint of in-situ leaching of uranium, gold and copper in Australia. *J Clean Prod* 84:382–390 . doi: 10.1016/j.jclepro.2013.09.033
- Harding G, Courtney C, Russo V (2017) When geography matters. A location-adjusted blue water footprint of commercial beef in South Africa. *J Clean Prod* 151:494–508 . doi: 10.1016/j.jclepro.2017.03.076
- He B, Pan Q, Deng Z (2018) Product carbon footprint for product life cycle under uncertainty. *J Clean Prod* 187:459–472 . doi: 10.1016/j.jclepro.2018.03.246
- Heidari MD, Huijbregts MAJ, Mobli H, et al (2017) Regionalised life cycle assessment of pasta production in Iran: Damage to terrestrial ecosystems. *J Clean Prod* 159:141–146 . doi: 10.1016/j.jclepro.2017.05.073
- Hendrickson TP, Nikolic M, Rakas J (2016) Selecting climate change mitigation strategies in urban areas through life cycle perspectives. *J Clean Prod* 135:1129–1137 . doi: 10.1016/j.jclepro.2016.06.075
- Herath I, Green S, Horne D, et al (2014) Quantifying and reducing the water footprint of rain-fed potato production part II: A hydrological assessment using modelling supported by measurements. *J Clean Prod* 81:103–110 . doi: 10.1016/j.jclepro.2014.06.025
- Hess T, Chatterton J, Daccache A, Williams A (2016) The impact of changing food choices on the blue water scarcity footprint and greenhouse gas emissions of the British diet: The example of potato, pasta and rice. *J Clean Prod* 112:4558–4568 . doi: 10.1016/j.jclepro.2015.08.098
- Hong J, Ren L, Hong J, Xu C (2016) Environmental impact assessment of corn straw utilization in China. *J Clean Prod* 112:1700–1708 . doi: 10.1016/j.jclepro.2015.02.081
- Hong J, Shen GQ, Feng Y, et al (2015) Greenhouse gas emissions during the construction phase of a building: A case study in China. *J Clean Prod* 103:249–259 . doi: 10.1016/j.jclepro.2014.11.023

- Hörtenhuber S, Piringer G, Zollitsch W, et al (2014) Land use and land use change in agricultural life cycle assessments and carbon footprints - The case for regionally specific land use change versus other methods. *J Clean Prod* 73:31–39 . doi: 10.1016/j.jclepro.2013.12.027
- Hossain MU, Leu SY, Poon CS (2016) Sustainability analysis of pelletized bio-fuel derived from recycled wood product wastes in Hong Kong. *J Clean Prod* 113:400–410 . doi: 10.1016/j.jclepro.2015.11.069
- Hou D, Qi S, Zhao B, et al (2017) Incorporating life cycle assessment with health risk assessment to select the ‘greenest’ cleanup level for Pb contaminated soil.’ *J Clean Prod* 162:1157–1168 . doi: 10.1016/j.jclepro.2017.06.135
- Hoxha E, Habert G, Lasvaux S, et al (2017) Influence of construction material uncertainties on residential building LCA reliability. *J Clean Prod* 144:33–47 . doi: 10.1016/j.jclepro.2016.12.068
- Huang J, Xu C chun, Ridoutt BG, et al (2017a) Nitrogen and phosphorus losses and eutrophication potential associated with fertilizer application to cropland in China. *J Clean Prod* 159:171–179 . doi: 10.1016/j.jclepro.2017.05.008
- Huang L, Liu Y, Krigsvoll G, Johansen F (2018) Life cycle assessment and life cycle cost of university dormitories in the southeast China: Case study of the university town of Fuzhou. *J Clean Prod* 173:151–159 . doi: 10.1016/j.jclepro.2017.06.021
- Huang R, Riddle M, Graziano D, et al (2016) Energy and emissions saving potential of additive manufacturing: the case of lightweight aircraft components. *J Clean Prod* 135:1559–1570 . doi: 10.1016/j.jclepro.2015.04.109
- Huang X, Chen C, Qian H, et al (2017b) Quantification for carbon footprint of agricultural inputs of grains cultivation in China since 1978. *J Clean Prod* 142:1629–1637 . doi: 10.1016/j.jclepro.2016.11.131
- Iannicelli-Zubiani EM, Giani MI, Recanati F, et al (2017) Environmental impacts of a hydrometallurgical process for electronic waste treatment: A life cycle assessment case study. *J Clean Prod* 140:1204–1216 . doi: 10.1016/j.jclepro.2016.10.040
- Ingrao C, Lo Giudice A, Mbohwa C, Clasadonte MT (2014) Life cycle inventory analysis of a precast reinforced concrete shed for goods storage. *J Clean Prod* 79:152–167 . doi: 10.1016/j.jclepro.2014.05.030
- Ingrao C, Matarazzo A, Tricase C, et al (2015) Life Cycle Assessment for highlighting environmental hotspots in Sicilian peach production systems. *J Clean Prod* 92:109–120 . doi: 10.1016/j.jclepro.2014.12.053
- Ingrao C, Scrucca F, Tricase C, Asdrubali F (2016) A comparative Life Cycle Assessment of external wall-compositions for cleaner construction solutions in buildings. *J Clean Prod* 124:283–298 . doi: 10.1016/j.jclepro.2016.02.112
- Islam KMN, Hildenbrand J, Hossain MM (2018) Life cycle impacts of three-way ceramic honeycomb catalytic converter in terms of disability adjusted life year. *J Clean Prod* 182:600–615 . doi: 10.1016/j.jclepro.2018.02.059
- Jakrawatana N, Ngammuangtueng P, Gheewala SH (2017) Linking substance flow analysis and soil and water assessment tool for nutrient management. *J Clean Prod* 142:1158–1168 . doi: 10.1016/j.jclepro.2016.07.185
- Jeong B, Wang H, Oguz E, Zhou P (2018) An effective framework for life cycle and cost assessment for marine vessels aiming to select optimal propulsion systems. *J Clean Prod* 187:111–130 . doi: 10.1016/j.jclepro.2018.03.184
- Ji C, Cheng K, Nayak D, Pan G (2018) Environmental and economic assessment of crop residue competitive utilization for biochar, briquette fuel and combined heat and power generation. *J Clean Prod* 192:916–923 . doi: 10.1016/j.jclepro.2018.05.026
- Jia X, Wang S, Li Z, et al (2018) Pinch analysis of GHG mitigation strategies for municipal solid waste management: A case study on Qingdao City. *J Clean Prod* 174:933–944 . doi: 10.1016/j.jclepro.2017.10.274
- Jiang L, Xiang D, Tan YF, et al (2018) Analysis of wind turbine Gearbox’s environmental impact considering its reliability. *J Clean Prod* 180:846–857 . doi: 10.1016/j.jclepro.2018.01.078
- Jin Q, Yang Y, Li A, et al (2017) Comparison of biogas production from an advanced micro-bio-loop and conventional system. *J Clean Prod* 148:245–253 . doi: 10.1016/j.jclepro.2017.02.021

- Jones C, Peshev V, Gilbert P, Mander S (2017) Battery storage for post-incentive PV uptake? A financial and life cycle carbon assessment of a non-domestic building. *J Clean Prod* 167:447–458 . doi: 10.1016/j.jclepro.2017.08.191
- Jorrat M del M, Araujo PZ, Mele FD (2018) Sugarcane water footprint in the province of Tucumán, Argentina. Comparison between different management practices. *J Clean Prod* 188:521–529 . doi: 10.1016/j.jclepro.2018.03.242
- Kaenchan P, Gheewala SH (2017) Cost – Benefit of water resource use in biofuel feedstock production. *J Clean Prod* 142:1192–1199 . doi: 10.1016/j.jclepro.2016.06.129
- Karlsson H, Börjesson P, Hansson PA, Ahlgren S (2014) Ethanol production in biorefineries using lignocellulosic feedstock - GHG performance, energy balance and implications of life cycle calculation methodology. *J Clean Prod* 83:420–427 . doi: 10.1016/j.jclepro.2014.07.029
- Karvonen J, Kunttu J, Suominen T, et al (2018) Integrating fast pyrolysis reactor with combined heat and power plant improves environmental and energy efficiency in bio-oil production. *J Clean Prod* 183:143–152 . doi: 10.1016/j.jclepro.2018.02.143
- Kawajiri K, Inoue T (2016) Cradle-to-gate greenhouse gas impact of nanoscale thin-film solid oxide fuel cells considering scale effect. *J Clean Prod* 112:4065–4070 . doi: 10.1016/j.jclepro.2015.05.138
- Khoo JZ, Haque N, Woodbridge G, et al (2017) A life cycle assessment of a new laterite processing technology. *J Clean Prod* 142:1765–1777 . doi: 10.1016/j.jclepro.2016.11.111
- Kikuchi Y, Oshita Y, Mayumi K, Hirao M (2017) Greenhouse gas emissions and socioeconomic effects of biomass-derived products based on structural path and life cycle analyses: A case study of polyethylene and polypropylene in Japan. *J Clean Prod* 167:289–305 . doi: 10.1016/j.jclepro.2017.08.179
- Kim J, Koo C, Kim CJ, et al (2015) Integrated CO<sub>2</sub>, cost, and schedule management system for building construction projects using the earned value management theory. *J Clean Prod* 103:275–285 . doi: 10.1016/j.jclepro.2014.05.031
- Kishita Y, Nakatsuka N, Akamatsu F (2017) Scenario analysis for sustainable woody biomass energy businesses: The case study of a Japanese rural community. *J Clean Prod* 142:1471–1485 . doi: 10.1016/j.jclepro.2016.11.161
- Kishita Y, Ohishi Y, Uwasu M, et al (2016) Evaluating the life cycle CO<sub>2</sub>emissions and costs of thermoelectric generators for passenger automobiles: A scenario analysis. *J Clean Prod* 126:607–619 . doi: 10.1016/j.jclepro.2016.02.121
- Kjaer LL, Pagoropoulos A, Schmidt JH, McAloone TC (2016) Challenges when evaluating Product/Service-Systems through Life Cycle Assessment. *J Clean Prod* 120:95–104 . doi: 10.1016/j.jclepro.2016.01.048
- Kjaer LL, Pigosso DCA, McAloone TC, Birkved M (2018) Guidelines for evaluating the environmental performance of Product/Service-Systems through life cycle assessment. *J Clean Prod* 190:666–678 . doi: 10.1016/j.jclepro.2018.04.108
- Koesling M, Hansen S, Schueler M (2017) Variations of energy intensities and potential for improvements in energy utilisation on conventional and organic Norwegian dairy farms. *J Clean Prod* 164:301–314 . doi: 10.1016/j.jclepro.2017.06.124
- Koido K, Takeuchi H, Hasegawa T (2018) Life cycle environmental and economic analysis of regional-scale food-waste biogas production with digestate nutrient management for fig fertilisation. *J Clean Prod* 190:552–562 . doi: 10.1016/j.jclepro.2018.04.165
- Koskela S, Dahlbo H, Judl J, et al (2014) Reusable plastic crate or recyclable cardboard box? A comparison of two delivery systems. *J Clean Prod* 69:83–90 . doi: 10.1016/j.jclepro.2014.01.045
- Kouchaki-Penchah H, Sharifi M, Mousazadeh H, Zarea-Hosseiniabadi H (2016) Life cycle assessment of medium-density fiberboard manufacturing process in Islamic Republic of Iran. *J Clean Prod* 112:351–358 . doi: 10.1016/j.jclepro.2015.07.049
- Kristensen T, Søgaard K, Eriksen J, Mogensen L (2015) Carbon footprint of cheese produced on milk from Holstein and Jersey cows fed hay differing in herb content. *J Clean Prod* 101:229–237 . doi: 10.1016/j.jclepro.2015.03.087
- Kucukvar M, Egilmez G, Tatari O (2014) Sustainability assessment of U.S. final consumption and investments: Triple-bottom-line input-output analysis. *J Clean Prod* 81:234–243 . doi: 10.1016/j.jclepro.2014.06.033



- Kulak M, Nemecek T, Frossard E, Gaillard G (2016) Eco-efficiency improvement by using integrative design and life cycle assessment. The case study of alternative bread supply chains in France. *J Clean Prod* 112:2452–2461 . doi: 10.1016/j.jclepro.2015.11.002
- Kulczycka J, Kowalski Z, Smol M, Wirth H (2016) Evaluation of the recovery of Rare Earth Elements (REE) from phosphogypsum waste - Case study of the WIZÓW Chemical Plant (Poland). *J Clean Prod* 113:345–354 . doi: 10.1016/j.jclepro.2015.11.039
- Kuramochi T (2016) Assessment of midterm CO<sub>2</sub>emissions reduction potential in the iron and steel industry: a case of Japan. *J Clean Prod* 132:81–97 . doi: 10.1016/j.jclepro.2015.02.055
- La Rosa AD, Recca G, Summerscales J, et al (2014) Bio-based versus traditional polymer composites. A life cycle assessment perspective. *J Clean Prod* 74:135–144 . doi: 10.1016/j.jclepro.2014.03.017
- Lamnatou C, Baig H, Chemisana D, Mallick TK (2016a) Environmental assessment of a building-integrated linear dielectric-based concentrating photovoltaic according to multiple life-cycle indicators. *J Clean Prod* 131:773–784 . doi: 10.1016/j.jclepro.2016.04.094
- Lamnatou C, Chemisana D (2014) Photovoltaic-green roofs: A life cycle assessment approach with emphasis on warm months of Mediterranean climate. *J Clean Prod* 72:57–75 . doi: 10.1016/j.jclepro.2014.03.006
- Lamnatou C, Ezcurra-Ciaurris X, Chemisana D, Plà-Aragonés LM (2016b) Environmental assessment of a pork-production system in North-East of Spain focusing on life-cycle swine nutrition. *J Clean Prod* 137:105–115 . doi: 10.1016/j.jclepro.2016.07.051
- Lamnatou C, Lecoivre B, Chemisana D, et al (2018a) Concentrating photovoltaic/thermal system with thermal and electricity storage: CO<sub>2</sub>emissions and multiple environmental indicators. *J Clean Prod* 192:376–389 . doi: 10.1016/j.jclepro.2018.04.205
- Lamnatou C, Motte F, Notton G, et al (2018b) Building-integrated solar thermal system with/without phase change material: Life cycle assessment based on ReCiPe, USEtox and Ecological footprint. *J Clean Prod* 193:672–683 . doi: 10.1016/j.jclepro.2018.05.032
- Lasvaux S, Schiopu N, Habert G, et al (2014) Influence of simplification of life cycle inventories on the accuracy of impact assessment: Application to construction products. *J Clean Prod* 79:142–151 . doi: 10.1016/j.jclepro.2014.06.003
- Lathuilière MJ, Miranda EJ, Bulle C, et al (2017) Land occupation and transformation impacts of soybean production in Southern Amazonia, Brazil. *J Clean Prod* 149:680–689 . doi: 10.1016/j.jclepro.2017.02.120
- Lazarevic D, Martin M (2016) Life cycle assessments, carbon footprints and carbon visions: Analysing environmental systems analyses of transportation biofuels in Sweden. *J Clean Prod* 137:249–257 . doi: 10.1016/j.jclepro.2016.07.075
- Leão S, Roux P, Núñez M, et al (2018) A worldwide-regionalised water supply mix (WS<sub>mix</sub>) for life cycle inventory of water use. *J Clean Prod* 172:302–313 . doi: 10.1016/j.jclepro.2017.10.135
- Lecksiwilai N, Gheewala SH, Sagisaka M, Yamaguchi K (2016) Net Energy Ratio and Life cycle greenhouse gases (GHG) assessment of bio-dimethyl ether (DME) produced from various agricultural residues in Thailand. *J Clean Prod* 134:523–531 . doi: 10.1016/j.jclepro.2015.10.085
- Lecksiwilai N, Gheewala SH, Silalertruksa T, Mungkalasiri J (2017) LCA of biofuels in Thailand using Thai Ecological Scarcity method. *J Clean Prod* 142:1183–1191 . doi: 10.1016/j.jclepro.2016.07.054
- Liang L, Lal R, Wu W, et al (2018) The water footprint and validity analysis of ecological engineering in North Beijing, China. *J Clean Prod* 172:1899–1909 . doi: 10.1016/j.jclepro.2017.11.251
- Lindahl M, Sundin E, Sakao T (2014) Environmental and economic benefits of Integrated Product Service Offerings quantified with real business cases. *J Clean Prod* 64:288–296 . doi: 10.1016/j.jclepro.2013.07.047
- Lishan X, Tao L, Yin W, et al (2018) Comparative life cycle assessment of sludge management: A case study of Xiamen, China. *J Clean Prod* 192:354–363 . doi: 10.1016/j.jclepro.2018.04.171
- Liu G, Yang Z, Chen B, et al (2015a) Scenarios for sewage sludge reduction and reuse in clinker production towards regional eco-industrial development: A comparative emergy-based assessment. *J Clean Prod* 103:371–383 . doi: 10.1016/j.jclepro.2014.09.003
- Liu X, Singh S, Gibbemeyer EL, et al (2018) The carbon-nitrogen nexus of transportation fuels. *J Clean Prod* 180:790–803 . doi: 10.1016/j.jclepro.2018.01.090

- Liu Y, Liu Y, Chen J (2015b) The impact of the Chinese automotive industry: Scenarios based on the national environmental goals. *J Clean Prod* 96:102–109 . doi: 10.1016/j.jclepro.2014.05.015
- Lo-Iacono-Ferreira VG, Torregrosa-López JI, Capuz-Rizo SF (2016) Use of Life Cycle Assessment methodology in the analysis of Ecological Footprint Assessment results to evaluate the environmental performance of universities. *J Clean Prod* 133:43–53 . doi: 10.1016/j.jclepro.2016.05.046
- Lockrey S, Verghese K, Crossin E, Nguyen H (2018) Concrete recycling life cycle flows and performance from construction and demolition waste in Hanoi. *J Clean Prod* 179:593–604 . doi: 10.1016/j.jclepro.2017.12.271
- Loiseau E, Roux P, Junqua G, et al (2014) Implementation of an adapted LCA framework to environmental assessment of a territory: Important learning points from a French Mediterranean case study. *J Clean Prod* 80:17–29 . doi: 10.1016/j.jclepro.2014.05.059
- Longo S, Mistretta M, Guarino F, Cellura M (2017) Life Cycle Assessment of organic and conventional apple supply chains in the North of Italy. *J Clean Prod* 140:654–663 . doi: 10.1016/j.jclepro.2016.02.049
- Lu Y, Le VH, Song X (2017) Beyond Boundaries: A Global Use of Life Cycle Inventories for Construction Materials. *J Clean Prod* 156:876–887 . doi: 10.1016/j.jclepro.2017.04.010
- Maciel VG, Zortea RB, Menezes Da Silva W, et al (2015) Life Cycle Inventory for the agricultural stages of soybean production in the state of Rio Grande do Sul, Brazil. *J Clean Prod* 93:65–74 . doi: 10.1016/j.jclepro.2015.01.016
- Man Y, Han Y, Hu Y, et al (2018) Synthetic natural gas as an alternative to coal for power generation in China: Life cycle analysis of haze pollution, greenhouse gas emission, and resource consumption. *J Clean Prod* 172:2503–2512 . doi: 10.1016/j.jclepro.2017.11.160
- Manda BMK, Bosch H, Karanam S, et al (2016) Value creation with life cycle assessment: An approach to contextualize the application of life cycle assessment in chemical companies to create sustainable value. *J Clean Prod* 126:337–351 . doi: 10.1016/j.jclepro.2016.03.020
- Manfredi M, Fantin V, Vignali G, Gavara R (2015) Environmental assessment of antimicrobial coatings for packaged fresh milk. *J Clean Prod* 95:291–300 . doi: 10.1016/j.jclepro.2015.02.048
- Manzardo A, Loss A, Jingzheng R, et al (2018) Definition and application of activity portfolio and control/influence approaches in organizational life cycle assessment. *J Clean Prod* 184:264–273 . doi: 10.1016/j.jclepro.2018.02.262
- Mao G, Wang S, Teng Q, et al (2017) The sustainable future of hydropower: A critical analysis of cooling units via the Theory of Inventive Problem Solving and Life Cycle Assessment methods. *J Clean Prod* 142:2446–2453 . doi: 10.1016/j.jclepro.2016.11.031
- Martin M, Svensson N, Eklund M (2015) Who gets the benefits? An approach for assessing the environmental performance of industrial symbiosis. *J Clean Prod* 98:263–271 . doi: 10.1016/j.jclepro.2013.06.024
- Martínez-Corona JI, Gibon T, Hertwich EG, Parra-Saldívar R (2017) Hybrid life cycle assessment of a geothermal plant: From physical to monetary inventory accounting. *J Clean Prod* 142:2509–2523 . doi: 10.1016/j.jclepro.2016.11.024
- Martinez-Hernandez E, Hernandez JE (2018) Conceptualization, modeling and environmental impact assessment of a natural rubber techno-ecological system with nutrient, water and energy integration. *J Clean Prod* 185:707–722 . doi: 10.1016/j.jclepro.2018.02.297
- Massaro V, Digiesi S, Mossa G, Ranieri L (2015) The sustainability of anaerobic digestion plants: A win-win strategy for public and private bodies. *J Clean Prod* 104:445–459 . doi: 10.1016/j.jclepro.2015.05.021
- Mattila HP, Hudd H, Zevenhoven R (2014) Cradle-to-gate life cycle assessment of precipitated calcium carbonate production from steel converter slag. *J Clean Prod* 84:611–618 . doi: 10.1016/j.jclepro.2014.05.064
- Matzen M, Demirel Y (2016) Methanol and dimethyl ether from renewable hydrogen and carbon dioxide: Alternative fuels production and life-cycle assessment. *J Clean Prod* 139:1068–1077 . doi: 10.1016/j.jclepro.2016.08.163
- Mauko Pranjić A, Ranogajec J, Škrlep L, et al (2018) Life cycle assessment of novel consolidants and a photocatalytic suspension for the conservation of the immovable cultural heritage. *J Clean Prod* 181:293–308 . doi: 10.1016/j.jclepro.2018.01.087

- Mayyas A, Omar M, Hayajneh M, Mayyas AR (2017) Vehicle's lightweight design vs. electrification from life cycle assessment perspective. *J Clean Prod* 167:687–701 . doi: 10.1016/j.jclepro.2017.08.145
- Medeiros DL, Sales EA, Kiperstok A (2015) Energy production from microalgae biomass: Carbon footprint and energy balance. *J Clean Prod* 96:493–500 . doi: 10.1016/j.jclepro.2014.07.038
- Mehmeti A, Todorovic M, Scardigno A (2016) Assessing the eco-efficiency improvements of Sinistra Ofanto irrigation scheme. *J Clean Prod* 138:208–216 . doi: 10.1016/j.jclepro.2016.03.085
- Meng F, Liu G, Yang Z, et al (2017) Structural analysis of embodied greenhouse gas emissions from key urban materials: A case study of Xiamen City, China. *J Clean Prod* 163:212–223 . doi: 10.1016/j.jclepro.2016.11.108
- Milanovic B, Agarski B, Vukelic D, et al (2017) Comparative exergy-based life cycle assessment of conventional and hybrid base transmitter stations. *J Clean Prod* 167:610–618 . doi: 10.1016/j.jclepro.2017.08.176
- Miller SA (2018) Supplementary cementitious materials to mitigate greenhouse gas emissions from concrete: can there be too much of a good thing? *J Clean Prod* 178:587–598 . doi: 10.1016/j.jclepro.2018.01.008
- Mimoso AF, Carvalho A, Mendes AN, Matos HA (2015) Roadmap for Environmental Impact Retrofit in chemical processes through the application of Life Cycle Assessment methods. *J Clean Prod* 90:128–141 . doi: 10.1016/j.jclepro.2014.11.057
- Mojarab Soufiyan M, Aghbashlo M, Mobli H (2017) Exergetic performance assessment of a long-life milk processing plant: A comprehensive survey. *J Clean Prod* 140:590–607 . doi: 10.1016/j.jclepro.2015.11.066
- Moncada J, Vural Gursel I, Huijgen WJJ, et al (2018) Techno-economic and ex-ante environmental assessment of C6 sugars production from spruce and corn. Comparison of organosolv and wet milling technologies. *J Clean Prod* 170:610–624 . doi: 10.1016/j.jclepro.2017.09.195
- Morera S, Comas J, Poch M, Corominas L (2015) Connection of neighboring wastewater treatment plants: Economic and environmental assessment. *J Clean Prod* 90:34–42 . doi: 10.1016/j.jclepro.2014.11.047
- Morera S, Corominas L, Poch M, et al (2016) Water footprint assessment in wastewater treatment plants. *J Clean Prod* 112:4741–4748 . doi: 10.1016/j.jclepro.2015.05.102
- Moretti M, Van Dael M, Malina R, Van Passel S (2018) Environmental assessment of waste feedstock mono-dimensional and bio-refinery systems: Combining manure co-digestion and municipal waste anaerobic digestion. *J Clean Prod* 171:954–961 . doi: 10.1016/j.jclepro.2017.10.097
- Morgan-Sagastume F, Heimersson S, Laera G, et al (2016) Techno-environmental assessment of integrating polyhydroxyalkanoate (PHA) production with services of municipal wastewater treatment. *J Clean Prod* 137:1368–1381 . doi: 10.1016/j.jclepro.2016.08.008
- Morrison B, Golden JS (2017) Life cycle assessment of co-firing coal and wood pellets in the Southeastern United States. *J Clean Prod* 150:188–196 . doi: 10.1016/j.jclepro.2017.03.026
- Mostert PF, van Middelaar CE, Bokkers EAM, de Boer IJM (2018) The impact of subclinical ketosis in dairy cows on greenhouse gas emissions of milk production. *J Clean Prod* 171:773–782 . doi: 10.1016/j.jclepro.2017.10.019
- Mota B, Gomes MI, Carvalho A, Barbosa-Povoa AP (2015) Towards supply chain sustainability: Economic, environmental and social design and planning. *J Clean Prod* 105:14–27 . doi: 10.1016/j.jclepro.2014.07.052
- Motuziene V, Rogoža A, Lapinskiene V, Vilutiene T (2016) Construction solutions for energy efficient single-family house based on its life cycle multi-criteria analysis: A case study. *J Clean Prod* 112:532–541 . doi: 10.1016/j.jclepro.2015.08.103
- Muench S (2015) Greenhouse gas mitigation potential of electricity from biomass. *J Clean Prod* 103:483–490 . doi: 10.1016/j.jclepro.2014.08.082
- Muñoz E, Curaqueo G, Cea M, et al (2017) Environmental hotspots in the life cycle of a biochar-soil system. *J Clean Prod* 158:1–7 . doi: 10.1016/j.jclepro.2017.04.163
- Murphy E, de Boer IJM, van Middelaar CE, et al (2017) Predicting freshwater demand on Irish dairy farms using farm data. *J Clean Prod* 166:58–65 . doi: 10.1016/j.jclepro.2017.07.240
- Murphy F, Devlin G, McDonnell K (2015) Greenhouse gas and energy based life cycle analysis of products from the Irish wood processing industry. *J Clean Prod* 92:134–141 . doi: 10.1002/slct.201600060

- Murray DM, Stankovic L, Stankovic V, Espinoza-Orias ND (2018) Appliance electrical consumption modelling at scale using smart meter data. *J Clean Prod* 187:237–249 . doi: 10.1016/j.jclepro.2018.03.163
- Muthukumarana TT, Karunathilake HP, PUNCHIHewa HKG, et al (2018) Life cycle environmental impacts of the apparel industry in Sri Lanka: Analysis of the energy sources. *J Clean Prod* 172:1346–1357 . doi: 10.1016/j.jclepro.2017.10.261
- Nakano K, Shibahara N, Nakai T, et al (2018) Greenhouse gas emissions from round wood production in Japan. *J Clean Prod* 170:1654–1664 . doi: 10.1016/j.jclepro.2016.10.024
- Navarro-Pineda FS, Handler R, Sacramento-Rivero JC (2017) Potential effects of the Mexican energy reform on life cycle impacts of electricity generation in Mexico and the Yucatan region. *J Clean Prod* 164:1016–1025 . doi: 10.1016/j.jclepro.2017.07.023
- Neppach S, Nunes KRA, Schebek L (2017) Organizational Environmental Footprint in German construction companies. *J Clean Prod* 142:78–86 . doi: 10.1016/j.jclepro.2016.05.065
- Neugebauer S, Emara Y, Hellerström C, Finkbeiner M (2017) Calculation of Fair wage potentials along products' life cycle – Introduction of a new midpoint impact category for social life cycle assessment. *J Clean Prod* 143:1221–1232 . doi: 10.1016/j.jclepro.2016.11.172
- Nguyen L, Moseson AJ, Farnam Y, Spatari S (2018) Effects of composition and transportation logistics on environmental, energy and cost metrics for the production of alternative cementitious binders. *J Clean Prod* 185:628–645 . doi: 10.1016/j.jclepro.2018.02.247
- Noland RB, Hanson CS (2015) Life-cycle greenhouse gas emissions associated with a highway reconstruction: A New Jersey case study. *J Clean Prod* 107:731–740 . doi: 10.1016/j.jclepro.2015.05.064
- Norgate T, Haque N, Koltun P (2014) The impact of uranium ore grade on the greenhouse gas footprint of nuclear power. *J Clean Prod* 84:360–367 . doi: 10.1016/j.jclepro.2013.11.034
- Notarnicola B, Tassielli G, Renzulli PA, Monforti F (2017) Energy flows and greenhouse gases of EU (European Union) national breads using an LCA (Life Cycle Assessment) approach. *J Clean Prod* 140:455–469 . doi: 10.1016/j.jclepro.2016.05.150
- Noya I, González-García S, Bacenetti J, et al (2018a) Environmental impacts of the cultivation-phase associated with agricultural crops for feed production. *J Clean Prod* 172:3721–3733 . doi: 10.1016/j.jclepro.2017.07.132
- Noya I, Villanueva-Rey P, González-García S, et al (2017) Life Cycle Assessment of pig production: A case study in Galicia. *J Clean Prod* 142:4327–4338 . doi: 10.1016/j.jclepro.2016.11.160
- Noya LI, Vasilaki V, Stojceska V, et al (2018b) An environmental evaluation of food supply chain using life cycle assessment: A case study on gluten free biscuit products. *J Clean Prod* 170:451–461 . doi: 10.1016/j.jclepro.2017.08.226
- Ntinis GK, Neumair M, Tsadilas CD, Meyer J (2017) Carbon footprint and cumulative energy demand of greenhouse and open-field tomato cultivation systems under Southern and Central European climatic conditions. *J Clean Prod* 142:3617–3626 . doi: 10.1016/j.jclepro.2016.10.106
- Oliveira L, Messagie M, Rangaraju S, et al (2015) Key issues of lithium-ion batteries - From resource depletion to environmental performance indicators. *J Clean Prod* 108:354–362 . doi: 10.1016/j.jclepro.2015.06.021
- Pairotti MB, Cerutti AK, Martini F, et al (2015) Energy consumption and GHG emission of the Mediterranean diet: A systemic assessment using a hybrid LCA-IO method. *J Clean Prod* 103:507–516 . doi: 10.1016/j.jclepro.2013.12.082
- Pang M, Zhang L, Liang S, et al (2017) Trade-off between carbon reduction benefits and ecological costs of biomass-based power plants with carbon capture and storage (CCS) in China. *J Clean Prod* 144:279–286 . doi: 10.1016/j.jclepro.2017.01.034
- Papa M, Alfonsín C, Moreira MT, Bertanza G (2016) Ranking wastewater treatment trains based on their impacts and benefits on human health: A “biological Assay and Disease” approach. *J Clean Prod* 113:311–317 . doi: 10.1016/j.jclepro.2015.11.021
- Parascanu MM, Sánchez P, Soreanu G, et al (2018) Environmental assessment of olive pomace valorization through two different thermochemical processes for energy production. *J Clean Prod* 186:771–781 . doi: 10.1016/j.jclepro.2018.03.169

- Parisi ML, Fatarella E, Spinelli D, et al (2015) Environmental impact assessment of an eco-efficient production for coloured textiles. *J Clean Prod* 108:514–524 . doi: 10.1016/j.jclepro.2015.06.032
- Park YS, Egilmez G, Kucukvar M (2015) A Novel Life Cycle-based Principal Component Analysis Framework for Eco-efficiency Analysis: Case of the United States Manufacturing and Transportation Nexus. *J Clean Prod* 92:327–342 . doi: 10.1016/j.jclepro.2014.12.057
- Pascual-González J, Guillén-Gosálbez G, Mateo-Sanz JM, Jiménez-Esteller L (2016) Statistical analysis of the ecoinvent database to uncover relationships between life cycle impact assessment metrics. *J Clean Prod* 112:359–368 . doi: 10.1016/j.jclepro.2015.05.129
- Passuello A, Rodríguez ED, Hirt E, et al (2017) Evaluation of the potential improvement in the environmental footprint of geopolymers using waste-derived activators. *J Clean Prod* 166:680–689 . doi: 10.1016/j.jclepro.2017.08.007
- Payen S, Basset-Mens C, Perret S (2015) LCA of local and imported tomato: An energy and water trade-off. *J Clean Prod* 87:139–148 . doi: 10.1016/j.jclepro.2014.09.007
- Payen S, Ledgard SF (2017) Aquatic eutrophication indicators in LCA: Methodological challenges illustrated using a case study in New Zealand. *J Clean Prod* 168:1463–1472 . doi: 10.1016/j.jclepro.2017.09.064
- Pelletier N (2018) Changes in the life cycle environmental footprint of egg production in Canada from 1962 to 2012. *J Clean Prod* 176:1144–1153 . doi: 10.1016/j.jclepro.2017.11.212
- Peñaloza D, Erlandsson M, Berlin J, et al (2018) Future scenarios for climate mitigation of new construction in Sweden: Effects of different technological pathways. *J Clean Prod* 187:1025–1035 . doi: 10.1016/j.jclepro.2018.03.285
- Pereira LG, Chagas MF, Dias MOS, et al (2015) Life cycle assessment of butanol production in sugarcane biorefineries in Brazil. *J Clean Prod* 96:557–568 . doi: 10.1016/j.jclepro.2014.01.059
- Pernollet F, Coelho CRV, van der Werf HMG (2017) Methods to simplify diet and food life cycle inventories: Accuracy versus data-collection resources. *J Clean Prod* 140:410–420 . doi: 10.1016/j.jclepro.2016.06.111
- Perrin A, Basset-Mens C, Huat J, Gabrielle B (2017) The variability of field emissions is critical to assessing the environmental impacts of vegetables: A Benin case-study. *J Clean Prod* 153:104–113 . doi: 10.1016/j.jclepro.2017.03.159
- Peters JF, Weil M (2018) Providing a common base for life cycle assessments of Li-Ion batteries. *J Clean Prod* 171:704–713 . doi: 10.1016/j.jclepro.2017.10.016
- Petit G, Sablayrolles C, Yannou-Le Bris G (2018) Combining eco-social and environmental indicators to assess the sustainability performance of a food value chain: A case study. *J Clean Prod* 191:135–143 . doi: 10.1016/j.jclepro.2018.04.156
- Petrescu L, Bonalumi D, Valenti G, et al (2017) Life Cycle Assessment for supercritical pulverized coal power plants with post-combustion carbon capture and storage. *J Clean Prod* 157:10–21 . doi: 10.1016/j.jclepro.2017.03.225
- Petrescu L, Cormos CC (2017) Environmental assessment of IGCC power plants with pre-combustion CO<sub>2</sub> capture by chemical & calcium looping methods. *J Clean Prod* 158:233–244 . doi: 10.1016/j.jclepro.2017.05.011
- Piccinno F, Hischier R, Saba A, et al (2016a) Multi-perspective application selection: A method to identify sustainable applications for new materials using the example of cellulose nanofiber reinforced composites. *J Clean Prod* 112:1199–1210 . doi: 10.1016/j.jclepro.2015.06.105
- Piccinno F, Hischier R, Seeger S, Som C (2016b) From laboratory to industrial scale: a scale-up framework for chemical processes in life cycle assessment studies. *J Clean Prod* 135:1085–1097 . doi: 10.1016/j.jclepro.2016.06.164
- Piccinno F, Hischier R, Seeger S, Som C (2018) Predicting the environmental impact of a future nanocellulose production at industrial scale: Application of the life cycle assessment scale-up framework. *J Clean Prod* 174:283–295 . doi: 10.1016/j.jclepro.2017.10.226
- Plouffe G, Bulle C, Deschênes L (2015) Case study: Taking zinc speciation into account in terrestrial ecotoxicity considerably impacts life cycle assessment results. *J Clean Prod* 108:1002–1008 . doi: 10.1016/j.jclepro.2015.06.050

- Polruang S, Sirivithayapakorn S, Prateep Na Talang R (2018) A comparative life cycle assessment of municipal wastewater treatment plants in Thailand under variable power schemes and effluent management programs. *J Clean Prod* 172:635–648 . doi: 10.1016/j.jclepro.2017.10.183
- Portugal-Pereira J, Lee L (2016) Economic and environmental benefits of waste-to-energy technologies for debris recovery in disaster-hit Northeast Japan. *J Clean Prod* 112:4419–4429 . doi: 10.1016/j.jclepro.2015.05.083
- Principi P, Fioretti R (2014) A comparative life cycle assessment of luminaires for general lighting for the office - Compact fluorescent (CFL) vs Light Emitting Diode (LED) - A case study. *J Clean Prod* 83:96–107 . doi: 10.1016/j.jclepro.2014.07.031
- Prosapio V, Norton I, De Marco I (2017) Optimization of freeze-drying using a Life Cycle Assessment approach: Strawberries' case study. *J Clean Prod* 168:1171–1179 . doi: 10.1016/j.jclepro.2017.09.125
- Queirós J, Malça J, Freire F (2015) Environmental life-cycle assessment of rapeseed produced in Central Europe: Addressing alternative fertilization and management practices. *J Clean Prod* 99:266–274 . doi: 10.1016/j.jclepro.2015.03.016
- Quinteiro P, Dias AC, Silva M, et al (2015) A contribution to the environmental impact assessment of green water flows. *J Clean Prod* 93:318–329 . doi: 10.1016/j.jclepro.2015.01.022
- Rainville A, Hawkins R, Bergerson J (2015) Building consensus in life cycle assessment: The potential for a Canadian product category rules standard to enhance credibility in greenhouse gas emissions estimates for Alberta's oil sands. *J Clean Prod* 103:525–533 . doi: 10.1016/j.jclepro.2014.06.067
- Ramírez-Arpide FR, Demirer GN, Gallegos-Vázquez C, et al (2018) Life cycle assessment of biogas production through anaerobic co-digestion of nopal cladodes and dairy cow manure. *J Clean Prod* 172:2313–2322 . doi: 10.1016/j.jclepro.2017.11.180
- Rathnayake M, Chaireongsirikul T, Svangariyaskul A, et al (2018) Process simulation based life cycle assessment for bioethanol production from cassava, cane molasses, and rice straw. *J Clean Prod* 190:24–35 . doi: 10.1016/j.jclepro.2018.04.152
- Rathore VK, Mondal P (2018) Life cycle assessment of defluoridation of water using laterite soil based adsorbents. *J Clean Prod* 180:716–727 . doi: 10.1016/j.jclepro.2018.01.176
- Raucci GS, Moreira CS, Alves PA, et al (2015) Greenhouse gas assessment of Brazilian soybean production: A case study of Mato Grosso State. *J Clean Prod* 96:419–425 . doi: 10.1016/j.jclepro.2014.02.064
- Raugei M, Morrey D, Hutchinson A, Winfield P (2015) A coherent life cycle assessment of a range of lightweighting strategies for compact vehicles. *J Clean Prod* 108:1168–1176 . doi: 10.1016/j.jclepro.2015.05.100
- Ravina M, Genon G (2015) Global and local emissions of a biogas plant considering the production of biomethane as an alternative end-use solution. *J Clean Prod* 102:115–126 . doi: 10.1016/j.jclepro.2015.04.056
- Ren J, Toniolo S (2018) Life cycle sustainability decision-support framework for ranking of hydrogen production pathways under uncertainties: An interval multi-criteria decision making approach. *J Clean Prod* 175:222–236 . doi: 10.1016/j.jclepro.2017.12.070
- Restrepo Á, Bazzo E, Miyake R (2015) A life cycle assessment of the Brazilian coal used for electric power generation. *J Clean Prod* 92:179–186 . doi: 10.1016/j.jclepro.2014.12.065
- Ribeiro I, Kaufmann J, Schmidt A, et al (2016) Fostering selection of sustainable manufacturing technologies - A case study involving product design, supply chain and life cycle performance. *J Clean Prod* 112:3306–3319 . doi: 10.1016/j.jclepro.2015.10.043
- Ripa M, Fiorentino G, Vacca V, Ulgiati S (2017) The relevance of site-specific data in Life Cycle Assessment (LCA). The case of the municipal solid waste management in the metropolitan city of Naples (Italy). *J Clean Prod* 142:445–460 . doi: 10.1016/j.jclepro.2016.09.149
- Rocco M V., Colombo E (2016) Evaluating energy embodied in national products through Input-Output analysis: Theoretical definition and practical application of international trades treatment methods. *J Clean Prod* 139:1449–1462 . doi: 10.1016/j.jclepro.2016.09.026
- Rodrigues C, Freire F (2017) Adaptive reuse of buildings: Eco-efficiency assessment of retrofit strategies for alternative uses of an historic building. *J Clean Prod* 157:94–105 . doi: 10.1016/j.jclepro.2017.04.104

- Rodríguez-Serrano I, Caldés N, Rúa C de la, Lechón Y (2017) Assessing the three sustainability pillars through the Framework for Integrated Sustainability Assessment (FISA): Case study of a Solar Thermal Electricity project in Mexico. *J Clean Prod* 149:1127–1143 . doi: 10.1016/j.jclepro.2017.02.179
- Rojas-Cardenas JC, Hasanbeigi A, Sheinbaum-Pardo C, Price L (2017) Energy efficiency in the Mexican iron and steel industry from an international perspective. *J Clean Prod* 158:335–348 . doi: 10.1016/j.jclepro.2017.04.092
- Rosa D, Figueiredo F, Castanheira ÉG, Freire F (2017) Life-cycle assessment of fresh and frozen chestnut. *J Clean Prod* 140:742–752 . doi: 10.1016/j.jclepro.2016.04.064
- Rosado LP, Vitale P, Penteado CSG, Arena U (2017) Life cycle assessment of natural and mixed recycled aggregate production in Brazil. *J Clean Prod* 151:634–642 . doi: 10.1016/j.jclepro.2017.03.068
- Rothwell A, Ridoutt B, Page G, Bellotti W (2016) Environmental performance of local food: Trade-offs and implications for climate resilience in a developed city. *J Clean Prod* 114:420–430 . doi: 10.1016/j.jclepro.2015.04.096
- Roux C, Schalbart P, Peuportier B (2016) Accounting for temporal variation of electricity production and consumption in the LCA of an energy-efficient house. *J Clean Prod* 113:532–540 . doi: 10.1016/j.jclepro.2015.11.052
- Røyne F, Berlin J, Ringström E (2015) Life cycle perspective in environmental strategy development on the industry cluster level: A case study of five chemical companies. *J Clean Prod* 86:125–131 . doi: 10.1016/j.jclepro.2014.08.016
- Røyne F, Peñaloza D, Sandin G, et al (2016) Climate impact assessment in life cycle assessments of forest products: Implications of method choice for results and decision-making. *J Clean Prod* 116:90–99 . doi: 10.1016/j.jclepro.2016.01.009
- Rubin RS, Castro MAS De, Brandão D, et al (2014) Utilization of Life Cycle Assessment methodology to compare two strategies for recovery of copper from printed circuit board scrap. *J Clean Prod* 64:297–305 . doi: 10.1016/j.jclepro.2013.07.051
- Saez de Bikuña K, Hamelin L, Hauschild MZ, et al (2018) A comparison of land use change accounting methods: seeking common grounds for key modeling choices in biofuel assessments. *J Clean Prod* 177:52–61 . doi: 10.1016/j.jclepro.2017.12.180
- Sáez de Guinoa A, Zambrana-Vasquez D, Alcalde A, et al (2017) Environmental assessment of a nano-technological aerogel-based panel for building insulation. *J Clean Prod* 161:1404–1415 . doi: 10.1016/j.jclepro.2017.06.102
- Salomone R, Saija G, Mondello G, et al (2017) Environmental impact of food waste bioconversion by insects: Application of Life Cycle Assessment to process using *Hermetia illucens*. *J Clean Prod* 140:890–905 . doi: 10.1016/j.jclepro.2016.06.154
- Sánchez MA (2015) Integrating sustainability issues into project management. *J Clean Prod* 96:319–330 . doi: 10.1016/j.jclepro.2013.12.087
- Santibañez-Aguilar JE, González-Campos JB, Ponce-Ortega JM, et al (2014) Optimal planning and site selection for distributed multiproduct biorefineries involving economic, environmental and social objectives. *J Clean Prod* 65:270–294 . doi: 10.1016/j.jclepro.2013.08.004
- Santoyo-Castelazo E, Azapagic A (2014) Sustainability assessment of energy systems: Integrating environmental, economic and social aspects. *J Clean Prod* 80:119–138 . doi: 10.1016/j.jclepro.2014.05.061
- Scalbi S, Fantin V, Antolini F (2017) Environmental assessment of new technologies: Production of a Quantum Dots-Light Emitting Diode. *J Clean Prod* 142:3702–3718 . doi: 10.1016/j.jclepro.2016.10.098
- Scur G, Barbosa ME (2017) Green supply chain management practices: Multiple case studies in the Brazilian home appliance industry. *J Clean Prod* 141:1293–1302 . doi: 10.1016/j.jclepro.2016.09.158
- Seghetta M, Romeo D, D'Este M, et al (2017) Seaweed as innovative feedstock for energy and feed – Evaluating the impacts through a Life Cycle Assessment. *J Clean Prod* 150:1–15 . doi: 10.1016/j.jclepro.2017.02.022
- Senga Kiessé T, Ventura A, van der Werf HMG, et al (2017) Introducing economic actors and their possibilities for action in LCA using sensitivity analysis: Application to hemp-based insulation products for building applications. *J Clean Prod* 142:3905–3916 . doi: 10.1016/j.jclepro.2016.10.069

- Serra P, Giuntoli J, Agostini A, et al (2017) Coupling sorghum biomass and wheat straw to minimise the environmental impact of bioenergy production. *J Clean Prod* 154:242–254 . doi: 10.1016/j.jclepro.2017.03.208
- Shan X, Zhou J, Chang VWC, Yang EH (2017) Life cycle assessment of adoption of local recycled aggregates and green concrete in Singapore perspective. *J Clean Prod* 164:918–926 . doi: 10.1016/j.jclepro.2017.07.015
- Sharib S, Halog A (2017) Enhancing value chains by applying industrial symbiosis concept to the Rubber City in Kedah, Malaysia. *J Clean Prod* 141:1095–1108 . doi: 10.1016/j.jclepro.2016.09.089
- Silalertruksa T, Pongpat P, Gheewala SH (2017) Life cycle assessment for enhancing environmental sustainability of sugarcane biorefinery in Thailand. *J Clean Prod* 140:906–913 . doi: 10.1016/j.jclepro.2016.06.010
- Silva RO, Torres CM, Rocha LB, et al (2018) Multi-objective optimization of an industrial ethanol distillation system for vinasse reduction – A case study. *J Clean Prod* 183:956–963 . doi: 10.1016/j.jclepro.2018.02.179
- Silvenius F, Grönroos J, Kankainen M, et al (2017) Impact of feed raw material to climate and eutrophication impacts of Finnish rainbow trout farming and comparisons on climate impact and eutrophication between farmed and wild fish. *J Clean Prod* 164:1467–1473 . doi: 10.1016/j.jclepro.2017.07.069
- Sim J, Sim J (2017) Air emission and environmental impact assessment of Korean automotive logistics. *J Clean Prod* 159:130–140 . doi: 10.1016/j.jclepro.2017.05.058
- Siqueira TTS, Duru M (2016) Economics and environmental performance issues of a typical Amazonian beef farm: A case study. *J Clean Prod* 112:2485–2494 . doi: 10.1016/j.jclepro.2015.10.032
- Skunca D, Tomasevic I, Nastasijevic I, et al (2018) Life cycle assessment of the chicken meat chain. *J Clean Prod* 184:440–450 . doi: 10.1016/j.jclepro.2018.02.274
- Sohn JL, Kalbar PP, Banta GT, Birkved M (2017a) Life-cycle based dynamic assessment of mineral wool insulation in a Danish residential building application. *J Clean Prod* 142:3243–3253 . doi: 10.1016/j.jclepro.2016.10.145
- Sohn JL, Kalbar PP, Birkved M (2017b) Life cycle based dynamic assessment coupled with multiple criteria decision analysis: A case study of determining an optimal building insulation level. *J Clean Prod* 162:449–457 . doi: 10.1016/j.jclepro.2017.06.058
- Sonesson U, Davis J, Flysjö A, et al (2017) Protein quality as functional unit – A methodological framework for inclusion in life cycle assessment of food. *J Clean Prod* 140:470–478 . doi: 10.1016/j.jclepro.2016.06.115
- Sproesser G, Chang YJ, Pittner A, et al (2015) Life Cycle Assessment of welding technologies for thick metal plate welds. *J Clean Prod* 108:46–53 . doi: 10.1016/j.jclepro.2015.06.121
- Stamou I, Antizar-Ladislao B (2016) A life cycle assessment of the use of compost from contaminated biodegradable municipal solid waste with silver and titanium dioxide nanoparticles. *J Clean Prod* 135:884–891 . doi: 10.1016/j.jclepro.2016.06.150
- Su X, Zhang X (2016) Temporal validation of life cycle greenhouse gas emissions of energy systems in China. *J Clean Prod* 139:250–257 . doi: 10.1016/j.jclepro.2016.08.043
- Suárez S, Roca X, Gasso S (2016) Product-specific life cycle assessment of recycled gypsum as a replacement for natural gypsum in ordinary Portland cement: Application to the Spanish context. *J Clean Prod* 117:150–159 . doi: 10.1016/j.jclepro.2016.01.044
- Subramanian K, Yung WKC (2017) Life cycle assessment study of an integrated desktop device -comparison of two information and communication technologies: Desktop computers versus all-in-ones. *J Clean Prod* 156:828–837 . doi: 10.1016/j.jclepro.2017.04.089
- Sykes AJ, Topp CFE, Wilson RM, et al (2017) A comparison of farm-level greenhouse gas calculators in their application on beef production systems. *J Clean Prod* 164:398–409 . doi: 10.1016/j.jclepro.2017.06.197
- Tähkämö L, Halonen L (2015) Life cycle assessment of road lighting luminaires - Comparison of light-emitting diode and high-pressure sodium technologies. *J Clean Prod* 93:234–242 . doi: 10.1016/j.jclepro.2015.01.025
- Tahmasebi M, Feike T, Soltani A, et al (2018) Trade-off between productivity and environmental sustainability in irrigated vs. rainfed wheat production in Iran. *J Clean Prod* 174:367–379 . doi: 10.1016/j.jclepro.2017.10.305



- Tallaksen J, Bauer F, Hultheberg C, et al (2015) Nitrogen fertilizers manufactured using wind power: Greenhouse gas and energy balance of community-scale ammonia production. *J Clean Prod* 107:626–635 . doi: 10.1016/j.jclepro.2015.05.130
- Tang Y, You F (2018) Life cycle environmental and economic analysis of pulverized coal oxy-fuel combustion combining with calcium looping process or chemical looping air separation. *J Clean Prod* 181:271–292 . doi: 10.1016/j.jclepro.2018.01.265
- Tasca AL, Nessi S, Rigamonti L (2017) Environmental sustainability of agri-food supply chains: An LCA comparison between two alternative forms of production and distribution of endive in northern Italy. *J Clean Prod* 140:725–741 . doi: 10.1016/j.jclepro.2016.06.170
- Tassielli G, Notarnicola B, Renzulli PA, Arcese G (2018) Environmental life cycle assessment of fresh and processed sweet cherries in southern Italy. *J Clean Prod* 171:184–197 . doi: 10.1016/j.jclepro.2017.09.227
- Tichenor NE, Peters CJ, Norris GA, et al (2017) Life cycle environmental consequences of grass-fed and dairy beef production systems in the Northeastern United States. *J Clean Prod* 142:1619–1628 . doi: 10.1016/j.jclepro.2016.11.138
- Todorović M, Mehmeti A, Cantore V (2018) Impact of different water and nitrogen inputs on the eco-efficiency of durum wheat cultivation in Mediterranean environments. *J Clean Prod* 183:1276–1288 . doi: 10.1016/j.jclepro.2018.02.200
- Tornese F, Pazour JA, Thorn BK, et al (2018) Investigating the environmental and economic impact of loading conditions and repositioning strategies for pallet pooling providers. *J Clean Prod* 172:155–168 . doi: 10.1016/j.jclepro.2017.10.054
- Tošić N, Marinković S, Dašić T, Stanić M (2015) Multicriteria optimization of natural and recycled aggregate concrete for structural use. *J Clean Prod* 87:766–776 . doi: 10.1016/j.jclepro.2014.10.070
- Treu H, Nordborg M, Cederberg C, et al (2017) Carbon footprints and land use of conventional and organic diets in Germany. *J Clean Prod* 161:127–142 . doi: 10.1016/j.jclepro.2017.05.041
- Tsiropoulos I, Faaij APC, Lundquist L, et al (2015) Life cycle impact assessment of bio-based plastics from sugarcane ethanol. *J Clean Prod* 90:114–127 . doi: 10.1016/j.jclepro.2014.11.071
- Turner DA, Williams ID, Kemp S (2016) Combined material flow analysis and life cycle assessment as a support tool for solid waste management decision making. *J Clean Prod* 129:234–248 . doi: 10.1016/j.jclepro.2016.04.077
- Ullah A, Perret SR, Gheewala SH, Soni P (2016) Eco-efficiency of cotton-cropping systems in Pakistan: an integrated approach of life cycle assessment and data envelopment analysis. *J Clean Prod* 134:623–632 . doi: 10.1016/j.jclepro.2015.10.112
- Uwizeye A, Gerber PJ, Schulte RPO, De Boer IJM (2016) A comprehensive framework to assess the sustainability of nutrient use in global livestock supply chains. *J Clean Prod* 129:647–658 . doi: 10.1016/j.jclepro.2016.03.108
- Vacek P, Struhala K, Matějka L (2017) Life-cycle study on semi intensive green roofs. *J Clean Prod* 154:203–213 . doi: 10.1016/j.jclepro.2017.03.188
- Vagnoni E, Franca A, Porqueddu C, Duce P (2017) Environmental profile of Sardinian sheep milk cheese supply chain: A comparison between two contrasting dairy systems. *J Clean Prod* 165:1078–1089 . doi: 10.1016/j.jclepro.2017.07.115
- van der Velden NM, Vogtländer JG (2017) Monetisation of external socio-economic costs of industrial production: A social-LCA-based case of clothing production. *J Clean Prod* 153:320–330 . doi: 10.1016/j.jclepro.2017.03.161
- Van Mierlo K, Rohmer S, Gerdessen JC (2017) A model for composing meat replacers: Reducing the environmental impact of our food consumption pattern while retaining its nutritional value. *J Clean Prod* 165:930–950 . doi: 10.1016/j.jclepro.2017.07.098
- van Zanten HHE, Mollenhorst H, Oonincx DGAB, et al (2015) From environmental nuisance to environmental opportunity: housefly larvae convert waste to livestock feed. *J Clean Prod* 102:362–369 . doi: 10.1016/j.jclepro.2015.04.106
- Vázquez-Rowe I, Cáceres AL, Torres-García JR, et al (2017) Life Cycle Assessment of the production of pisco in Peru. *J Clean Prod* 142:4369–4383 . doi: 10.1016/j.jclepro.2016.11.136

- Vazquez-Rowe I, Kahhat R, Quispe I, Bentín M (2016) Environmental profile of green asparagus production in a hyper-arid zone in coastal Peru. *J Clean Prod* 112:2505–2517 . doi: 10.1016/j.jclepro.2015.09.076
- Ventura A, Lorino T, Le L (2015) Modeling of Polycyclic Aromatic Hydrocarbons stack emissions from a hot mix asphalt plant for gate-to-gate Life Cycle Inventory. *J Clean Prod* 93:151–158 . doi: 10.1016/j.jclepro.2015.01.021
- Villard A, Lelah A, Brissaud D (2015) Drawing a chip environmental profile: Environmental indicators for the semiconductor industry. *J Clean Prod* 86:98–109 . doi: 10.1016/j.jclepro.2014.08.061
- Villares M, İşildar A, Mendoza Beltran A, Guinee J (2016) Applying an ex-ante life cycle perspective to metal recovery from e-waste using bioleaching. *J Clean Prod* 129:315–328 . doi: 10.1016/j.jclepro.2016.04.066
- Visser F, Dargusch P, Smith C, Grace PR (2015) Application of the Crop Carbon Progress Calculator in a ‘ farm to ship ’ cotton production case study in Australia. *J Clean Prod* 103:675–684 . doi: 10.1016/j.jclepro.2014.09.093
- Vitale P, Spagnuolo A, Lubritto C, Arena U (2018) Environmental performances of residential buildings with a structure in cold formed steel or reinforced concrete. *J Clean Prod* 189:839–852 . doi: 10.1016/j.jclepro.2018.04.088
- Voinov A, Arodudu O, Van Duren I, et al (2015) Estimating the potential of roadside vegetation for bioenergy production. *J Clean Prod* 102:213–225 . doi: 10.1016/j.jclepro.2015.04.034
- Walsh BP, Bruton K, O’Sullivan DTJ (2017) The true value of water: A case-study in manufacturing process water-management. *J Clean Prod* 141:551–567 . doi: 10.1016/j.jclepro.2016.09.106
- Wandl MT, Haberl H (2017) Greenhouse gas emissions of small scale ornamental plant production in Austria - A case study. *J Clean Prod* 141:1123–1133 . doi: 10.1016/j.jclepro.2016.09.093
- Wang H, Wang X, Song J, et al (2018a) Uncovering regional energy and environmental benefits of urban waste utilization: A physical input-output analysis for a city case. *J Clean Prod* 189:922–932 . doi: 10.1016/j.jclepro.2018.04.107
- Wang J, Zhao J, Wang Y, et al (2017) Application potential of solar-assisted post-combustion carbon capture and storage (CCS) in China: A life cycle approach. *J Clean Prod* 154:541–552 . doi: 10.1016/j.jclepro.2017.04.021
- Wang Q, Liu W, Yuan X, et al (2018b) Environmental impact analysis and process optimization of batteries based on life cycle assessment. *J Clean Prod* 174:1262–1273 . doi: 10.1016/j.jclepro.2017.11.059
- Wang T, Wang J, Wu P, et al (2018c) Estimating the environmental costs and benefits of demolition waste using life cycle assessment and willingness-to-pay: A case study in Shenzhen. *J Clean Prod* 172:14–26 . doi: 10.1016/j.jclepro.2017.10.168
- Wang X, Dadouma A, Chen Y, et al (2015a) Sustainability evaluation of the large-scale pig farming system in North China: An energy analysis based on life cycle assessment. *J Clean Prod* 102:144–164 . doi: 10.1016/j.jclepro.2015.04.071
- Wang X, Duan Z, Wu L, Yang D (2015b) Estimation of carbon dioxide emission in highway construction: A case study in southwest region of China. *J Clean Prod* 103:705–714 . doi: 10.1016/j.jclepro.2014.10.030
- Wang X, Li K, Song J, et al (2018d) Integrated assessment of straw utilization for energy production from views of regional energy, environmental and socioeconomic benefits. *J Clean Prod* 190:787–798 . doi: 10.1016/j.jclepro.2018.04.191
- Wang XH, Wang X, Huppel G, et al (2015c) Environmental implications of increasingly stringent sewage discharge standards in municipal wastewater treatment plants: Case study of a cool area of China. *J Clean Prod* 94:278–283 . doi: 10.1016/j.jclepro.2015.02.007
- Wang Y, Cheng MH (2018) Greenhouse gas emissions embedded in US-China fuel ethanol trade: A comparative well-to-wheel estimate. *J Clean Prod* 183:653–661 . doi: 10.1016/j.jclepro.2018.02.080
- Wang Y, Wu X, Tong X, et al (2018e) Life cycle assessment of large-scale and household biogas plants in northwest China. *J Clean Prod* 192:221–235 . doi: 10.1016/j.jclepro.2018.04.264
- Wang ZB, Zhang HL, Lu XH, et al (2016) Lowering carbon footprint of winter wheat by improving management practices in North China Plain. *J Clean Prod* 112:149–157 . doi: 10.1016/j.jclepro.2015.06.084

- Ward H, Burger M, Chang YJ, et al (2017) Assessing carbon dioxide emission reduction potentials of improved manufacturing processes using multiregional input output frameworks. *J Clean Prod* 163:154–165 . doi: 10.1016/j.jclepro.2016.02.062
- Wei W, Wu X, Li J, et al (2018) Ultra-high voltage network induced energy cost and carbon emissions. *J Clean Prod* 178:276–292 . doi: 10.1016/j.jclepro.2017.12.175
- Welfle A, Gilbert P, Thornley P, Stephenson A (2017) Generating low-carbon heat from biomass: Life cycle assessment of bioenergy scenarios. *J Clean Prod* 149:448–460 . doi: 10.1016/j.jclepro.2017.02.035
- Weng Z, Haque N, Mudd GM, Jowitt SM (2016) Assessing the energy requirements and global warming potential of the production of rare earth elements. *J Clean Prod* 139:1282–1297 . doi: 10.1016/j.jclepro.2016.08.132
- Wigger H, Steinfeldt M, Bianchin A (2017) Environmental benefits of coatings based on nano-tungsten-carbide cobalt ceramics. *J Clean Prod* 148:212–222 . doi: 10.1016/j.jclepro.2017.01.179
- Wikström F, Williams H, Venkatesh G (2016) The influence of packaging attributes on recycling and food waste behaviour – An environmental comparison of two packaging alternatives. *J Clean Prod* 137:895–902 . doi: 10.1016/j.jclepro.2016.07.097
- Willersinn C, Möbius S, Mouron P, et al (2017) Environmental impacts of food losses along the entire Swiss potato supply chain – Current situation and reduction potentials. *J Clean Prod* 140:860–870 . doi: 10.1016/j.jclepro.2016.06.178
- Williams AG, Leinonen I, Kyriazakis I (2016) Environmental benefits of using Turkey litter as a fuel instead of a fertiliser. *J Clean Prod* 113:167–175 . doi: 10.1016/j.jclepro.2015.11.044
- Wolff A, Gondran N, Brodhag C (2017) Detecting unsustainable pressures exerted on biodiversity by a company. Application to the food portfolio of a retailer. *J Clean Prod* 166:784–797 . doi: 10.1016/j.jclepro.2017.08.057
- Wolfram P, Wiedmann T, Diesendorf M (2016) Carbon footprint scenarios for renewable electricity in Australia. *J Clean Prod* 124:236–245 . doi: 10.1016/j.jclepro.2016.02.080
- Xiao R, Zhang Y, Liu X, Yuan Z (2015) A life-cycle assessment of household refrigerators in China. *J Clean Prod* 95:301–310 . doi: 10.1016/j.jclepro.2015.02.031
- Xiao R, Zhang Y, Yuan Z (2016) Environmental impacts of reclamation and recycling processes of refrigerators using life cycle assessment (LCA) methods. *J Clean Prod* 131:52–59 . doi: 10.1016/j.jclepro.2016.05.085
- Xing K, Qian W, Zaman AU (2016) Development of a cloud-based platform for footprint assessment in green supply chain management. *J Clean Prod* 139:191–203 . doi: 10.1016/j.jclepro.2016.08.042
- Xu C, Chen W, Hong J (2014) Life-cycle environmental and economic assessment of sewage sludge treatment in China. *J Clean Prod* 67:79–87 . doi: 10.1016/j.jclepro.2013.12.002
- Xu X, Lan Y (2016) A comparative study on carbon footprints between plant- and animal-based foods in China. *J Clean Prod* 112:2581–2592 . doi: 10.1016/j.jclepro.2015.10.059
- Xue J, Liu G, Brown MT, Casazza M (2018) Trash or treasure? Prospects for full aluminum chain in China based on the recycling options. *J Clean Prod* 193:217–227 . doi: 10.1016/j.jclepro.2018.05.075
- Yang X, Gao W, Zhang M, et al (2014) Reducing agricultural carbon footprint through diversified crop rotation systems in the North China Plain. *J Clean Prod* 76:131–139 . doi: 10.1016/j.jclepro.2014.03.063
- Yang Y, Ingwersen WW, Hawkins TR, et al (2017) USEEIO: A new and transparent United States environmentally-extended input-output model. *J Clean Prod* 158:308–318 . doi: 10.1016/j.jclepro.2017.04.150
- Yao L, Liu T, Chen X, et al (2018) An integrated method of life-cycle assessment and system dynamics for waste mobile phone management and recycling in China. *J Clean Prod* 187:852–862 . doi: 10.1016/j.jclepro.2018.03.195
- Yasin S, Behary N, Perwuelz A, Guan J (2018) Life cycle assessment of flame retardant cotton textiles with optimized end-of-life phase. *J Clean Prod* 172:1080–1088 . doi: 10.1016/j.jclepro.2017.10.198
- Yeo Z, Ng R, Song B (2016) Technique for quantification of embodied carbon footprint of construction projects using probabilistic emission factor estimators. *J Clean Prod* 119:135–151 . doi: 10.1016/j.jclepro.2016.01.076

- Yokokawa N, Kikuchi-Uehara E, Sugiyama H, Hirao M (2018) Framework for analyzing the effects of packaging on food loss reduction by considering consumer behavior. *J Clean Prod* 174:26–34 . doi: 10.1016/j.jclepro.2017.10.242
- Yu B, Sun Y, Tian X (2018) Capturing time effect of pavement carbon footprint estimation in the life cycle. *J Clean Prod* 171:877–883 . doi: 10.1016/j.jclepro.2017.09.266
- Yuan X, Tang Y, Li Y, et al (2018a) Environmental and economic impacts assessment of concrete pavement brick and permeable brick production process - A case study in China. *J Clean Prod* 171:198–208 . doi: 10.1016/j.jclepro.2017.10.037
- Yuan Z, Pan X, Chen T, et al (2018b) Evaluating environmental impacts of pig slurry treatment technologies with a life-cycle perspective. *J Clean Prod* 188:840–850 . doi: 10.1016/j.jclepro.2018.04.021
- Yue Q, Xu X, Hillier J, et al (2017) Mitigating greenhouse gas emissions in agriculture: From farm production to food consumption. *J Clean Prod* 149:1011–1019 . doi: 10.1016/j.jclepro.2017.02.172
- Zamani B, Sandin G, Peters GM (2017) Life cycle assessment of clothing libraries: can collaborative consumption reduce the environmental impact of fast fashion? *J Clean Prod* 162:1368–1375 . doi: 10.1016/j.jclepro.2017.06.128
- Zastrow P, Molina-Moreno F, García-Segura T, et al (2017) Life cycle assessment of cost-optimized buttress earth-retaining walls: A parametric study. *J Clean Prod* 140:1037–1048 . doi: 10.1016/j.jclepro.2016.10.085
- Zhang F, Wang Q, Hong J, et al (2017a) Life cycle assessment of diammonium- and monoammonium-phosphate fertilizer production in China. *J Clean Prod* 141:1087–1094 . doi: 10.1016/j.jclepro.2016.09.107
- Zhang H, Burr J, Zhao F (2017b) A comparative life cycle assessment (LCA) of lighting technologies for greenhouse crop production. *J Clean Prod* 140:705–713 . doi: 10.1016/j.jclepro.2016.01.014
- Zhang H, Haapala KR (2015) Integrating sustainable manufacturing assessment into decision making for a production work cell. *J Clean Prod* 105:52–63 . doi: 10.1016/j.jclepro.2014.01.038
- Zhang J, Xu L (2015) Embodied carbon budget accounting system for calculating carbon footprint of large hydropower project. *J Clean Prod* 96:444–451 . doi: 10.1016/j.jclepro.2013.10.060
- Zhang Q, Nakatani J, Wang T, et al (2017c) Hidden greenhouse gas emissions for water utilities in China's cities. *J Clean Prod* 162:665–677 . doi: 10.1016/j.jclepro.2017.06.042
- Zhang S, Pang B, Zhang Z (2015a) Carbon footprint analysis of two different types of hydropower schemes: Comparing earth-rockfill dams and concrete gravity dams using hybrid life cycle assessment. *J Clean Prod* 103:854–862 . doi: 10.1016/j.jclepro.2014.06.053
- Zhang W, Gu F, Dai F, et al (2016) Decision framework for feasibility analysis of introducing the steam turbine unit to recover industrial waste heat based on economic and environmental assessments. *J Clean Prod* 137:1491–1502 . doi: 10.1016/j.jclepro.2016.07.039
- Zhang W, Guo J, Gu F, Gu X (2018) Coupling life cycle assessment and life cycle costing as an evaluation tool for developing product service system of high energy-consuming equipment. *J Clean Prod* 183:1043–1053 . doi: 10.1016/j.jclepro.2018.02.146
- Zhang X, Luo L, Skitmore M (2015b) Household carbon emission research: An analytical review of measurement, influencing factors and mitigation prospects. *J Clean Prod* 103:873–883 . doi: 10.1016/j.jclepro.2015.04.024
- Zhang Y, Zhang J, Wang C, et al (2017d) China and Trans-Pacific Partnership Agreement countries: Estimation of the virtual water trade of agricultural products. *J Clean Prod* 140:1493–1503 . doi: 10.1016/j.jclepro.2016.10.001
- Zhao G, Ruan D, Wang Q, et al (2018) Systemic boundaries in industrial systems: A new concept defined to improve LCA for metallurgical and manufacturing systems. *J Clean Prod* 187:717–729 . doi: 10.1016/j.jclepro.2018.03.263
- Zhao J, Hong J, Chen W, et al (2016) Life cycle assessment of lignite pyrolysis: A case study in China. *J Clean Prod* 113:548–556 . doi: 10.1016/j.jclepro.2015.11.088
- Zhao Z, Liu Y, Wang F, et al (2017) Life cycle assessment of primary energy demand and greenhouse gas (GHG) emissions of four propylene production pathways in China. *J Clean Prod* 163:285–292 . doi: 10.1016/j.jclepro.2015.12.099

- Zhu Y, Waqas MA, Li Y, et al (2018) Large-scale farming operations are win-win for grain production, soil carbon storage and mitigation of greenhouse gases. *J Clean Prod* 172:2143–2152 . doi: 10.1016/j.jclepro.2017.11.205
- Zhuang M, Gongbuzeren, Li W (2017) Greenhouse gas emission of pastoralism is lower than combined extensive/intensive livestock husbandry: A case study on the Qinghai-Tibet Plateau of China. *J Clean Prod* 147:514–522 . doi: 10.1016/j.jclepro.2017.01.126
- Židonienė S, Kruopienė J (2015) Life Cycle Assessment in environmental impact assessments of industrial projects: Towards the improvement. *J Clean Prod* 106:533–540 . doi: 10.1016/j.jclepro.2014.07.081
- Zimmer K, Fröhling M, Breun P, Schultmann F (2017) Assessing social risks of global supply chains: A quantitative analytical approach and its application to supplier selection in the German automotive industry. *J Clean Prod* 149:96–109 . doi: 10.1016/j.jclepro.2017.02.041
- Zisopoulos FK, Overmars L, van der Goot AJ (2017) A conceptual exergy-based framework for assessing, monitoring, and designing a resource efficient agri-food sector. *J Clean Prod* 158:38–50 . doi: 10.1016/j.jclepro.2017.04.160
- Zucaro A, Forte A, De Vico G, Fierro A (2016) Environmental loading of Italian semi-intensive snail farming system evaluated by means of life cycle assessment. *J Clean Prod* 125:56–67 . doi: 10.1016/j.jclepro.2016.03.045
- Zucaro A, Forte A, Faugno S, et al (2018) Effects of urea-fertilization rates on the environmental performance of giant reed lignocellulosic feedstock produced for biorefinery purpose. *J Clean Prod* 172:4200–4211 . doi: 10.1016/j.jclepro.2016.12.017

#### **2.1.4 No mention of uncertainty**

- (Thanos) Bourtsalas AC, Zhang J, Castaldi MJ, Themelis NJ (2018) Use of non-recycled plastics and paper as alternative fuel in cement production. *J Clean Prod* 181:8–16 . doi: 10.1016/j.jclepro.2018.01.214
- Abdulbaki D, Al-Hindi M, Yassine A, Abou Najm M (2017) An optimization model for the allocation of water resources. *J Clean Prod* 164:994–1006 . doi: 10.1016/j.jclepro.2017.07.024
- Abeliotis K, Barla SA, Detsis V, Malindretos G (2016) Life cycle assessment of carnation production in Greece. *J Clean Prod* 112:32–38 . doi: 10.1016/j.jclepro.2015.06.018
- Abín R, Laca A, Laca A, Díaz M (2018) Environmental assesment of intensive egg production: A Spanish case study. *J Clean Prod* 179:160–168 . doi: 10.1016/j.jclepro.2018.01.067
- Abuşoğlu A, Özahi E, İhsan Kutlar A, Al-jaf H (2017) Life cycle assessment (LCA) of digested sewage sludge incineration for heat and power production. *J Clean Prod* 142:1684–1692 . doi: 10.1016/j.jclepro.2016.11.121
- Adiansyah JS, Rosano M, Vink S, Keir G (2015) A framework for a sustainable approach to mine tailings management: Disposal strategies. *J Clean Prod* 108:1–13 . doi: 10.1016/j.jclepro.2015.07.139
- Aganovic K, Smetana S, Grauwet T, et al (2017) Pilot scale thermal and alternative pasteurization of tomato and watermelon juice: An energy comparison and life cycle assessment. *J Clean Prod* 141:514–525 . doi: 10.1016/j.jclepro.2016.09.015
- Agarski B, Nikolić V, Kamberović Ž, et al (2017) Comparative life cycle assessment of Ni-based catalyst synthesis processes. *J Clean Prod* 162:7–15 . doi: 10.1016/j.jclepro.2017.06.012
- Aguirre-Villegas HA, Benson CH (2017) Case history of environmental impacts of an Indonesian coal supply chain. *J Clean Prod* 157:47–56 . doi: 10.1016/j.jclepro.2017.03.232
- Aguirre-Villegas HA, Larson RA (2017) Evaluating greenhouse gas emissions from dairy manure management practices using survey data and lifecycle tools. *J Clean Prod* 143:169–179 . doi: 10.1016/j.jclepro.2016.12.133
- Ahamed A, Yin K, Ng BJH, et al (2016) Life cycle assessment of the present and proposed food waste management technologies from environmental and economic impact perspectives. *J Clean Prod* 131:607–614 . doi: 10.1016/j.jclepro.2016.04.127
- Aitken D, Bulboa C, Godoy-Faundez A, et al (2014) Life cycle assessment of macroalgae cultivation and processing for biofuel production. *J Clean Prod* 75:45–56 . doi: 10.1016/j.jclepro.2014.03.080

- Al-Ansari T, Korre A, Nie Z, Shah N (2017) Integration of greenhouse gas control technologies within the energy, water and food nexus to enhance the environmental performance of food production systems. *J Clean Prod* 162:1592–1606 . doi: 10.1016/j.jclepro.2017.06.097
- Alam MK, Biswas WK, Bell RW (2016) Greenhouse gas implications of novel and conventional rice production technologies in the Eastern-Gangetic plains. *J Clean Prod* 112:3977–3987 . doi: 10.1016/j.jclepro.2015.09.071
- Alaphilippe A, Boissy J, Simon S, Godard C (2016) Environmental impact of intensive versus semi-extensive apple orchards: use of a specific methodological framework for Life Cycle Assessments (LCA) in perennial crops. *J Clean Prod* 127:555–561 . doi: 10.1016/j.jclepro.2016.04.031
- Alcántara-Concepción V, Gavilán-García A, Gavilán-García IC (2016) Environmental impacts at the end of life of computers and their management alternatives in México. *J Clean Prod* 131:615–628 . doi: 10.1016/j.jclepro.2016.04.125
- Alcántara V, Padilla E, Piaggio M (2017) Nitrogen oxide emissions and productive structure in Spain: An input–output perspective. *J Clean Prod* 141:420–428 . doi: 10.1016/j.jclepro.2016.09.088
- Ali BM, van Zanten HHE, Berentsen P, et al (2017) Environmental and economic impacts of using co-products in the diets of finishing pigs in Brazil. *J Clean Prod* 162:247–259 . doi: 10.1016/j.jclepro.2017.06.041
- Almeida CMVB, Rodrigues AJM, Agostinho F, Giannetti BF (2017) Material selection for environmental responsibility: the case of soft drinks packaging in Brazil. *J Clean Prod* 142:173–179 . doi: 10.1016/j.jclepro.2016.04.130
- Almeida MI, Dias AC, Demertzi M, Arroja L (2015) Contribution to the development of product category rules for ceramic bricks. *J Clean Prod* 92:206–215 . doi: 10.1016/j.jclepro.2014.12.073
- Almeida MI, Dias AC, Demertzi M, Arroja L (2016) Environmental profile of ceramic tiles and their potential for improvement. *J Clean Prod* 131:583–593 . doi: 10.1016/j.jclepro.2016.04.131
- Alvarez S, Blanquer M, Rubio A (2014) Carbon footprint using the Compound Method based on Financial Accounts. the case of the School of Forestry Engineering, Technical University of Madrid. *J Clean Prod* 66:224–232 . doi: 10.1016/j.jclepro.2013.11.050
- Amado Alviz PL, Alvarez AJ (2017) Comparative life cycle assessment of the use of an ionic liquid ([Bmim]Br) versus a volatile organic solvent in the production of acetylsalicylic acid. *J Clean Prod* 168:1614–1624 . doi: 10.1016/j.jclepro.2017.02.107
- Amienyo D, Camilleri C, Azapagic A (2014) Environmental impacts of consumption of Australian red wine in the UK. *J Clean Prod* 72:110–119 . doi: 10.1016/j.jclepro.2014.02.044
- Amini A, Kim Y, Zhang J, et al (2015) Environmental and economic sustainability of ion exchange drinking water treatment for organics removal. *J Clean Prod* 104:413–421 . doi: 10.1016/j.jclepro.2015.05.056
- An J, Li Y, Middleton RS (2018) Reducing energy consumption and carbon emissions of magnesia refractory products: A life-cycle perspective. *J Clean Prod* 182:363–371 . doi: 10.1016/j.jclepro.2018.01.266
- An J, Xue X (2014) Life cycle environmental impact assessment of borax and boric acid production in China. *J Clean Prod* 66:121–127 . doi: 10.1016/j.jclepro.2013.10.020
- Andre A, Nagy T, Toth AJ, et al (2018) Distillation contra pervaporation: Comprehensive investigation of isobutanol-water separation. *J Clean Prod* 187:804–818 . doi: 10.1016/j.jclepro.2018.02.157
- Andrić I, Pina A, Ferrão P, et al (2017) On the performance of district heating systems in urban environment: an emergy approach. *J Clean Prod* 142:109–120 . doi: 10.1016/j.jclepro.2016.05.124
- Angelis-Dimakis A, Alexandratou A, Balzarini A (2016a) Value chain upgrading in a textile dyeing industry. *J Clean Prod* 138:237–247 . doi: 10.1016/j.jclepro.2016.02.137
- Angelis-Dimakis A, Arampatzis G, Assimacopoulos D (2016b) Systemic eco-efficiency assessment of meso-level water use systems. *J Clean Prod* 138:195–207 . doi: 10.1016/j.jclepro.2016.02.136
- Arafat HA, Jijakli K, Ahsan A (2015) Environmental performance and energy recovery potential of five processes for municipal solid waste treatment. *J Clean Prod* 105:233–240 . doi: 10.1016/j.jclepro.2013.11.071
- Arcese G, Lucchetti MC, Massa I (2017) Modeling Social Life Cycle Assessment framework for the Italian wine sector. *J Clean Prod* 140:1027–1036 . doi: 10.1016/j.jclepro.2016.06.137
- Ardolino F, Parrillo F, Arena U (2018) Biowaste-to-biomethane or biowaste-to-energy? An LCA study on anaerobic digestion of organic waste. *J Clean Prod* 174:462–476 . doi: 10.1016/j.jclepro.2017.10.320

- Arena N, Alpay E, Kirkby N, et al (2018) An on demand chilling system: Activated carbon based desorptive cooling. *J Clean Prod* 176:937–945 . doi: 10.1016/j.jclepro.2017.12.025
- Arena N, Lee J, Clift R (2016a) Life Cycle Assessment of activated carbon production from coconut shells. *J Clean Prod* 125:68–77 . doi: 10.1016/j.jclepro.2016.03.073
- Arena N, Sinclair P, Lee J, Clift R (2017) Life cycle engineering of production, use and recovery of self-chilling beverage cans. *J Clean Prod* 142:1562–1570 . doi: 10.1016/j.jclepro.2016.11.148
- Arena U, Ardolino F, Di Gregorio F (2016b) Technological, environmental and social aspects of a recycling process of post-consumer absorbent hygiene products. *J Clean Prod* 127:289–301 . doi: 10.1016/j.jclepro.2016.03.164
- Arora P, Hoadley AFA, Mahajani SM, Ganesh A (2017) Multi-objective optimization of biomass based ammonia production - Potential and perspective in different countries. *J Clean Prod* 148:363–374 . doi: 10.1016/j.jclepro.2017.01.148
- Arunrat N, Wang C, Pumijumng N (2016) Reprint of Alternative cropping systems for greenhouse gases mitigation in rice field: a case study in Phichit province of Thailand. *J Clean Prod* 134:547–562 . doi: 10.1016/j.jclepro.2016.08.015
- Aryapratama R, Janssen M (2017) Prospective life cycle assessment of bio-based adipic acid production from forest residues. *J Clean Prod* 164:434–443 . doi: 10.1016/j.jclepro.2017.06.222
- Arzoumanidis I, Salomone R, Petti L, et al (2017) Is there a simplified LCA tool suitable for the agri-food industry? An assessment of selected tools. *J Clean Prod* 149:406–425 . doi: 10.1016/j.jclepro.2017.02.059
- Asadi S, Babaizadeh H, Foster N, Broun R (2016) Environmental and economic life cycle assessment of PEX and copper plumbing systems: A case study. *J Clean Prod* 137:1228–1236 . doi: 10.1016/j.jclepro.2016.08.006
- Ashworth AJ, Taylor AM, Reed DL, et al (2015) Environmental impact assessment of regional switchgrass feedstock production comparing nitrogen input scenarios and legume-intercropping systems. *J Clean Prod* 87:227–234 . doi: 10.1016/j.jclepro.2014.10.002
- Asselin-Balençon AC, Jolliet O (2014) Metrics and indices to assess the life cycle costs and greenhouse gas impacts of a dairy digester. *J Clean Prod* 79:98–107 . doi: 10.1016/j.jclepro.2014.05.024
- Atilgan B, Azapagic A (2015) Life cycle environmental impacts of electricity from fossil fuels in Turkey. *J Clean Prod* 106:555–564 . doi: 10.1016/j.jclepro.2014.07.046
- Avadí Á, Vázquez-Rowe I, Fréon P (2014) Eco-efficiency assessment of the Peruvian anchoveta steel and wooden fleets using the LCA+DEA framework. *J Clean Prod* 70:118–131 . doi: 10.1016/j.jclepro.2014.01.047
- Bacenetti J, Fusi A, Negri M, Fiala M (2015) Impact of cropping system and soil tillage on environmental performance of cereal silage productions. *J Clean Prod* 86:49–59 . doi: 10.1016/j.jclepro.2014.08.052
- Badiola M, Basurko OC, Gabiña G, Mendiola D (2017) Integration of energy audits in the Life Cycle Assessment methodology to improve the environmental performance assessment of Recirculating Aquaculture Systems. *J Clean Prod* 157:155–166 . doi: 10.1016/j.jclepro.2017.04.139
- Bai S, Wang X, Huppel G, et al (2017) Using site-specific life cycle assessment methodology to evaluate Chinese wastewater treatment scenarios: A comparative study of site-generic and site-specific methods. *J Clean Prod* 144:1–7 . doi: 10.1016/j.jclepro.2016.12.172
- Bakken TH, Modahl IS, Engeland K, et al (2016) The life-cycle water footprint of two hydropower projects in Norway. *J Clean Prod* 113:241–250 . doi: 10.1016/j.jclepro.2015.12.036
- Bakker C, Wang F, Huisman J, Den Hollander M (2014) Products that go round: Exploring product life extension through design. *J Clean Prod* 69:10–16 . doi: 10.1016/j.jclepro.2014.01.028
- Balaban O, Puppim de Oliveira JA (2017) Sustainable buildings for healthier cities: assessing the co-benefits of green buildings in Japan. *J Clean Prod* 163:S68–S78 . doi: 10.1016/j.jclepro.2016.01.086
- Baral A, Sen S, Roesler JR (2018) Use phase assessment of photocatalytic cool pavements. *J Clean Prod* 190:722–728 . doi: 10.1016/j.jclepro.2018.04.155
- Bartolozzi I, Baldereschi E, Daddi T, Iraldo F (2018) The application of life cycle assessment (LCA) in municipal solid waste management: A comparative study on street sweeping services. *J Clean Prod* 182:455–465 . doi: 10.1016/j.jclepro.2018.01.230

- Barton L, Thamo T, Engelbrecht D, Biswas WK (2014) Does growing grain legumes or applying lime cost effectively lower greenhouse gas emissions from wheat production in a semi-arid climate? *J Clean Prod* 83:194–203 . doi: 10.1016/j.jclepro.2014.07.020
- Batouli SM, Zhu Y, Nar M, D'Souza NA (2014) Environmental performance of kenaf-fiber reinforced polyurethane: A life cycle assessment approach. *J Clean Prod* 66:164–173 . doi: 10.1016/j.jclepro.2013.11.064
- Battini F, Agostini A, Tabaglio V, Amaducci S (2016) Environmental impacts of different dairy farming systems in the Po Valley. *J Clean Prod* 112:91–102 . doi: 10.1016/j.jclepro.2015.09.062
- Bava L, Zucali M, Sandrucci A, Tamburini A (2017) Environmental impact of the typical heavy pig production in Italy. *J Clean Prod* 140:685–691 . doi: 10.1016/j.jclepro.2015.11.029
- Benetto E, Jury C, Igos E, et al (2015) Using atmospheric plasma to design multilayer film from polylactic acid and thermoplastic starch: A screening life cycle assessment. *J Clean Prod* 87:953–960 . doi: 10.1016/j.jclepro.2014.10.056
- Bertoluci G, Leroy Y, Olsson A (2014) Exploring the environmental impacts of olive packaging solutions for the European food market. *J Clean Prod* 64:234–243 . doi: 10.1016/j.jclepro.2013.09.029
- Besson M, Aubin J, Komen H, et al (2016) Environmental impacts of genetic improvement of growth rate and feed conversion ratio in fish farming under rearing density and nitrogen output limitations. *J Clean Prod* 116:100–109 . doi: 10.1016/j.jclepro.2015.12.084
- Bessou C, Chase LDC, Henson IE, et al (2014) Pilot application of PalmGHG, the Roundtable on Sustainable Palm Oil greenhouse gas calculator for oil palm products. *J Clean Prod* 73:136–145 . doi: 10.1016/j.jclepro.2013.12.008
- Bevilacqua M, Ciarapica FE, Mazzuto G, Paciarotti C (2014) Environmental analysis of a cotton yarn supply Chain. *J Clean Prod* 82:154–165 . doi: 10.1016/j.jclepro.2014.06.082
- Bicer Y, Dincer I (2018) Life cycle assessment of ammonia utilization in city transportation and power generation. *J Clean Prod* 170:1594–1601 . doi: 10.1016/j.jclepro.2017.09.243
- Biernacki P, Röther T, Paul W, et al (2018) Environmental impact of the excess electricity conversion into methanol. *J Clean Prod* 191:87–98 . doi: 10.1016/j.jclepro.2018.04.232
- Blanco C, Caro F, Corbett CJ (2016) The state of supply chain carbon footprinting: analysis of CDP disclosures by US firms. *J Clean Prod* 135:1189–1197 . doi: 10.1016/j.jclepro.2016.06.132
- Bogaerts M, Cirhigiri L, Robinson I, et al (2017) Climate change mitigation through intensified pasture management: Estimating greenhouse gas emissions on cattle farms in the Brazilian Amazon. *J Clean Prod* 162:1539–1550 . doi: 10.1016/j.jclepro.2017.06.130
- Boonrod B, Prapainainar C, Narataruksa P, et al (2017) Evaluating the environmental impacts of bio-hydrogenated diesel production from palm oil and fatty acid methyl ester through life cycle assessment. *J Clean Prod* 142:1210–1221 . doi: 10.1016/j.jclepro.2016.07.128
- Boonterm M, Sunyadeth S, Dedpakdee S, et al (2016) Characterization and comparison of cellulose fiber extraction from rice straw by chemical treatment and thermal steam explosion. *J Clean Prod* 134:592–599 . doi: 10.1016/j.jclepro.2015.09.084
- Bortolini M, Cascini A, Gamberi M, et al (2014) Sustainable design and life cycle assessment of an innovative multi-functional haymaking agricultural machinery. *J Clean Prod* 82:23–36 . doi: 10.1016/j.jclepro.2014.06.054
- Boschiero M, Cherubini F, Nati C, Zerbe S (2016) Life cycle assessment of bioenergy production from orchards woody residues in Northern Italy. *J Clean Prod* 112:2569–2580 . doi: 10.1016/j.jclepro.2015.09.094
- Botello-Álvarez JE, Rivas-García P, Fausto-Castro L, et al (2018) Informal collection, recycling and export of valuable waste as transcendent factor in the municipal solid waste management: A Latin-American reality. *J Clean Prod* 182:485–495 . doi: 10.1016/j.jclepro.2018.02.065
- Bozorg Chenani S, Lehvavirta S, Häkkinen T (2015) Life cycle assessment of layers of green roofs. *J Clean Prod* 90:153–162 . doi: 10.1016/j.jclepro.2014.11.070
- Braga AM, Silvestre JD, de Brito J (2017) Compared environmental and economic impact from cradle to gate of concrete with natural and recycled coarse aggregates. *J Clean Prod* 162:529–543 . doi: 10.1016/j.jclepro.2017.06.057



- Bragaglio A, Napolitano F, Pacelli C, et al (2018) Environmental impacts of Italian beef production: A comparison between different systems. *J Clean Prod* 172:4033–4043 . doi: 10.1016/j.jclepro.2017.03.078
- Braunwarth L, Amrhein S, Schreck T, Kaloudis M (2015) Ecological comparison of soldering and sintering as die-attach technologies in power electronics. *J Clean Prod* 102:408–417 . doi: 10.1016/j.jclepro.2015.03.100
- Bravi M, Basosi R (2014) Environmental impact of electricity from selected geothermal power plants in Italy. *J Clean Prod* 66:301–308 . doi: 10.1016/j.jclepro.2013.11.015
- Brizmohun R, Ramjeawon T, Azapagic A (2015) Life cycle assessment of electricity generation in Mauritius. *J Clean Prod* 106:565–575 . doi: 10.1016/j.jclepro.2014.11.033
- Brunori AME, Sdringola P, Dini F, et al (2017) Carbon balance and Life Cycle Assessment in an oak plantation for mined area reclamation. *J Clean Prod* 144:69–78 . doi: 10.1016/j.jclepro.2016.12.116
- Brynolf S, Fridell E, Andersson K (2014) Environmental assessment of marine fuels: Liquefied natural gas, liquefied biogas, methanol and bio-methanol. *J Clean Prod* 74:86–95 . doi: 10.1016/j.jclepro.2014.03.052
- Burmistrz P, Chmielniak T, Czepirski L, Gazda-Grzywacz M (2016) Carbon footprint of the hydrogen production process utilizing subbituminous coal and lignite gasification. *J Clean Prod* 139:858–865 . doi: 10.1016/j.jclepro.2016.08.112
- Cadarso M, Gómez N, López LA, Tobarra M (2016) Calculating tourism's carbon footprint: Measuring the impact of investments. *J Clean Prod* 111:529–537 . doi: 10.1016/j.jclepro.2014.09.019
- Calado EA, Leite M, Silva A (2018) Selecting composite materials considering cost and environmental impact in the early phases of aircraft structure design. *J Clean Prod* 186:113–122 . doi: 10.1016/j.jclepro.2018.02.048
- Camba A, González-García S, Bala A, et al (2014) Modeling the leachate flow and aggregated emissions from municipal waste landfills under life cycle thinking in the Oceanic region of the Iberian Peninsula. *J Clean Prod* 67:98–106 . doi: 10.1016/j.jclepro.2013.12.013
- Campion N, Thiel CL, Woods NC, et al (2015) Sustainable healthcare and environmental life-cycle impacts of disposable supplies: A focus on disposable custom packs. *J Clean Prod* 94:46–55 . doi: 10.1016/j.jclepro.2015.01.076
- Cano PI, Colón J, Ramírez M, et al (2018) Life cycle assessment of different physical-chemical and biological technologies for biogas desulfurization in sewage treatment plants. *J Clean Prod* 181:663–674 . doi: 10.1016/j.jclepro.2018.02.018
- Cao X, Li X, Zhu Y, Zhang Z (2015) A comparative study of environmental performance between prefabricated and traditional residential buildings in China. *J Clean Prod* 109:131–143 . doi: 10.1016/j.jclepro.2015.04.120
- Carter CM, Cho J, Glanzer A, et al (2016) Cost, energy and emissions assessment of organic polymer light-emitting device architectures. *J Clean Prod* 137:1418–1431 . doi: 10.1016/j.jclepro.2016.07.186
- Cascini A, Gamberi M, Mora C, et al (2016) Comparative Carbon Footprint Assessment of commercial walk-in refrigeration systems under different use configurations. *J Clean Prod* 112:3998–4011 . doi: 10.1016/j.jclepro.2015.08.075
- Castañé S, Antón A (2017) Assessment of the nutritional quality and environmental impact of two food diets: A Mediterranean and a vegan diet. *J Clean Prod* 167:929–937 . doi: 10.1016/j.jclepro.2017.04.121
- Castanheira ÉG, Grisoli R, Coelho S, et al (2015) Life-cycle assessment of soybean-based biodiesel in Europe: Comparing grain, oil and biodiesel import from Brazil. *J Clean Prod* 102:188–201 . doi: 10.1016/j.jclepro.2015.04.036
- Celauro C, Corriere F, Guerrieri M, et al (2017) Environmental analysis of different construction techniques and maintenance activities for a typical local road. *J Clean Prod* 142:3482–3489 . doi: 10.1016/j.jclepro.2016.10.119
- Cellura M, La Rocca V, Longo S, Mistretta M (2014) Energy and environmental impacts of energy related products (ErP): A case study of biomass-fuelled systems. *J Clean Prod* 85:359–370 . doi: 10.1016/j.jclepro.2013.12.059
- Cerutti AK, Beccaro GL, Bruun S, et al (2016) Assessment methods for sustainable tourism declarations: The case of holiday farms. *J Clean Prod* 111:511–519 . doi: 10.1016/j.jclepro.2014.12.032

- Cerutti AK, Calvo A, Bruun S (2014) Comparison of the environmental performance of light mechanization and animal traction using a modular LCA approach. *J Clean Prod* 64:396–403 . doi: 10.1016/j.jclepro.2013.09.027
- Cesari V, Zucali M, Sandrucci A, et al (2017) Environmental impact assessment of an Italian vertically integrated broiler system through a Life Cycle approach. *J Clean Prod* 143:904–911 . doi: 10.1016/j.jclepro.2016.12.030
- Chang CC, Chang KC, Lin WC, Wu MH (2017a) Carbon footprint analysis in the aquaculture industry: Assessment of an ecological shrimp farm. *J Clean Prod* 168:1101–1107 . doi: 10.1016/j.jclepro.2017.09.109
- Chang FC, Lin LD, Ko CH, et al (2017b) Life cycle assessment of bioethanol production from three feedstocks and two fermentation waste reutilization schemes. *J Clean Prod* 143:973–979 . doi: 10.1016/j.jclepro.2016.12.024
- Chen J, Zhao F, Liu Z, et al (2017) Greenhouse gas emissions from road construction in China: A province-level analysis. *J Clean Prod* 168:1039–1047 . doi: 10.1016/j.jclepro.2017.08.243
- Chen W, Hong J, Xu C (2015) Pollutants generated by cement production in China, their impacts, and the potential for environmental improvement. *J Clean Prod* 103:61–69 . doi: 10.1016/j.jclepro.2014.04.048
- Chen W, Hong J, Yuan X, Liu J (2016) Environmental impact assessment of monocrystalline silicon solar photovoltaic cell production: A case study in China. *J Clean Prod* 112:1025–1032 . doi: 10.1016/j.jclepro.2015.08.024
- Cheroennet N, Pongpinyopap S, Leejarkpai T, Suwanmanee U (2017) A trade-off between carbon and water impacts in bio-based box production chains in Thailand: A case study of PS, PLAS, PLAS/starch, and PBS. *J Clean Prod* 167:987–1001 . doi: 10.1016/j.jclepro.2016.11.152
- Cheung WM, Leong JT, Vichare P (2017) Incorporating lean thinking and life cycle assessment to reduce environmental impacts of plastic injection moulded products. *J Clean Prod* 167:759–775 . doi: 10.1016/j.jclepro.2017.08.208
- Chiriaco MV, Grossi G, Castaldi S, Valentini R (2017) The contribution to climate change of the organic versus conventional wheat farming: A case study on the carbon footprint of wholemeal bread production in Italy. *J Clean Prod* 153:309–319 . doi: 10.1016/j.jclepro.2017.03.111
- Chobtang J, Ledgard SF, McLaren SJ, Donaghy DJ (2017) Life cycle environmental impacts of high and low intensification pasture-based milk production systems: A case study of the Waikato region, New Zealand. *J Clean Prod* 140:664–674 . doi: 10.1016/j.jclepro.2016.06.079
- Christoforou E, Kylili A, Fokaides PA, Ioannou I (2016) Cradle to site Life Cycle Assessment (LCA) of adobe bricks. *J Clean Prod* 112:443–452 . doi: 10.1016/j.jclepro.2015.09.016
- Chuenwong K, Chiarakorn S, Sajjakulnukit B (2017) Specific energy consumption and carbon intensity of ceramic tablewares: Small enterprises (SEs) in Thailand. *J Clean Prod* 147:395–405 . doi: 10.1016/j.jclepro.2017.01.089
- Cimprich A, Young SB, Helbig C, et al (2017) Extension of geopolitical supply risk methodology: Characterization model applied to conventional and electric vehicles. *J Clean Prod* 162:754–763 . doi: 10.1016/j.jclepro.2017.06.063
- Clune SJ, Lockrey S (2014) Developing environmental sustainability strategies, the Double Diamond method of LCA and design thinking: A case study from aged care. *J Clean Prod* 85:67–82 . doi: 10.1016/j.jclepro.2014.02.003
- Cobut A, Blanchet P, Beauregard R (2015) The environmental footprint of interior wood doors in non-residential buildings - Part 1: Life cycle assessment. *J Clean Prod* 109:232–246 . doi: 10.1016/j.jclepro.2015.04.079
- Coltro L, Marton LFM, Pilecco FP, et al (2017) Environmental profile of rice production in Southern Brazil: A comparison between irrigated and subsurface drip irrigated cropping systems. *J Clean Prod* 153:491–505 . doi: 10.1016/j.jclepro.2016.09.207
- Cordella M, Bauer I, Lehmann A, et al (2015) Evolution of disposable baby diapers in Europe: Life cycle assessment of environmental impacts and identification of key areas of improvement. *J Clean Prod* 95:322–331 . doi: 10.1016/j.jclepro.2015.02.040

- Corona A, Parajuli R, Ambye-Jensen M, et al (2018) Environmental screening of potential biomass for green biorefinery conversion. *J Clean Prod* 189:344–357 . doi: 10.1016/j.jclepro.2018.03.316
- Costa MP, Schoeneboom JC, Oliveira SA, et al (2018) A socio-eco-efficiency analysis of integrated and non-integrated crop-livestock-forestry systems in the Brazilian Cerrado based on LCA. *J Clean Prod* 171:1460–1471 . doi: 10.1016/j.jclepro.2017.10.063
- Cristóbal J, Limleamthong P, Manfredi S, Guillén-Gosálbez G (2016) Methodology for combined use of data envelopment analysis and life cycle assessment applied to food waste management. *J Clean Prod* 135:158–168 . doi: 10.1016/j.jclepro.2016.06.085
- Cui J, Yan P, Wang X, et al (2018) Integrated assessment of economic and environmental consequences of shifting cropping system from wheat-maize to monocropped maize in the North China Plain. *J Clean Prod* 193:524–532 . doi: 10.1016/j.jclepro.2018.05.104
- D'Avino L, Dainelli R, Lazzeri L, Spugnoli P (2015) The role of co-products in biorefinery sustainability: Energy allocation versus substitution method in rapeseed and carinata biodiesel chains. *J Clean Prod* 94:108–115 . doi: 10.1016/j.jclepro.2015.01.088
- da Costa TP, Quinteiro P, Tarelho LA da C, et al (2018) Environmental impacts of forest biomass-to-energy conversion technologies: Grate furnace vs. fluidised bed furnace. *J Clean Prod* 171:153–162 . doi: 10.1016/j.jclepro.2017.09.287
- da Rocha CG, Passuello A, Consoli NC, et al (2016) Life cycle assessment for soil stabilization dosages: A study for the Paraguayan Chaco. *J Clean Prod* 139:309–318 . doi: 10.1016/j.jclepro.2016.07.219
- Daddi T, Nucci B, Iraldo F (2017) Using Life Cycle Assessment (LCA) to measure the environmental benefits of industrial symbiosis in an industrial cluster of SMEs. *J Clean Prod* 147:157–164 . doi: 10.1016/j.jclepro.2017.01.090
- Dahlbo H, Bachér J, Lähinen K, et al (2015) Construction and demolition waste management - A holistic evaluation of environmental performance. *J Clean Prod* 107:333–341 . doi: 10.1016/j.jclepro.2015.02.073
- Daiyue H, Chao L, Puel G (2015) Spatial Environmental Balance to Information and Communication Technology products in different regions of China by using LCA. *J Clean Prod* 91:128–135 . doi: 10.1016/j.jclepro.2014.11.025
- De La Fuente A, Pons O, Josa A, Aguado A (2016) Multi-criteria decision making in the sustainability assessment of sewerage pipe systems. *J Clean Prod* 112:4762–4770 . doi: 10.1016/j.jclepro.2015.07.002
- de la Fuente T, Athanassiadis D, González-García S, Nordfjell T (2017) Cradle-to-gate life cycle assessment of forest supply chains: Comparison of Canadian and Swedish case studies. *J Clean Prod* 143:866–881 . doi: 10.1016/j.jclepro.2016.12.034
- de Léis CM, Nogueira AR, Kulay L, Tadini CC (2017) Environmental and energy analysis of biopolymer film based on cassava starch in Brazil. *J Clean Prod* 143:76–89 . doi: 10.1016/j.jclepro.2016.12.147
- de Mello M, Young A, Villardi H, et al (2017) Biodiesel production by the methylic-alkaline and ethylic-enzymatic routes: Discussion of some environmental aspects. *J Clean Prod* 144:347–357 . doi: 10.1016/j.jclepro.2017.01.032
- Del Borghi A, Gallo M, Strazza C, Del Borghi M (2014) An evaluation of environmental sustainability in the food industry through Life Cycle Assessment: The case study of tomato products supply chain. *J Clean Prod* 78:121–130 . doi: 10.1016/j.jclepro.2014.04.083
- Delogu M, Zanchi L, Maltese S, et al (2016) Environmental and economic life cycle assessment of a lightweight solution for an automotive component: A comparison between talc-filled and hollow glass microspheres-reinforced polymer composites. *J Clean Prod* 139:548–560 . doi: 10.1016/j.jclepro.2016.08.079
- Demertzi M, Sierra-Pérez J, Paulo JA, et al (2017) Environmental performance of expanded cork slab and granules through life cycle assessment. *J Clean Prod* 145:294–302 . doi: 10.1016/j.jclepro.2017.01.071
- Deng Y, Paraskevas D, Tian Y, et al (2016) Life cycle assessment of flax-fibre reinforced epoxidized linseed oil composite with a flame retardant for electronic applications. *J Clean Prod* 133:427–438 . doi: 10.1016/j.jclepro.2016.05.172
- Devi LP, Palaniappan S (2017) A study on energy use for excavation and transport of soil during building construction. *J Clean Prod* 164:543–556 . doi: 10.1016/j.jclepro.2017.06.208

- Deviatkin I, Kapustina V, Vasilieva E, et al (2016) Comparative life cycle assessment of deinking sludge utilization alternatives. *J Clean Prod* 112:3232–3243 . doi: 10.1016/j.jclepro.2015.10.022
- Dhingra R, Das S (2014) Life cycle energy and environmental evaluation of downsized vs. lightweight material automotive engines. *J Clean Prod* 85:347–358 . doi: 10.1016/j.jclepro.2014.08.107
- Dias GM, Ayer NW, Khosla S, et al (2017) Life cycle perspectives on the sustainability of Ontario greenhouse tomato production: Benchmarking and improvement opportunities. *J Clean Prod* 140:831–839 . doi: 10.1016/j.jclepro.2016.06.039
- Dick M, Abreu Da Silva M, Dewes H (2015) Life cycle assessment of beef cattle production in two typical grassland systems of southern Brazil. *J Clean Prod* 96:426–434 . doi: 10.1016/j.jclepro.2014.01.080
- Dijkman TJ, Birkved M, Saxe H, et al (2017) Environmental impacts of barley cultivation under current and future climatic conditions. *J Clean Prod* 140:644–653 . doi: 10.1016/j.jclepro.2016.05.154
- Dilkes-Hoffman LS, Lane JL, Grant T, et al (2018) Environmental impact of biodegradable food packaging when considering food waste. *J Clean Prod* 180:325–334 . doi: 10.1016/j.jclepro.2018.01.169
- Ding N, Liu J, Yang J, Lu B (2018) Water footprints of energy sources in China: Exploring options to improve water efficiency. *J Clean Prod* 174:1021–1031 . doi: 10.1016/j.jclepro.2017.10.273
- Ding N, Yang J, Liu J (2016) Substance flow analysis of aluminum industry in mainland China. *J Clean Prod* 133:1167–1180 . doi: 10.1016/j.jclepro.2016.05.129
- Ding N, Yang Y, Cai H, et al (2017) Life cycle assessment of fuel ethanol produced from soluble sugar in sweet sorghum stalks in North China. *J Clean Prod* 161:335–344 . doi: 10.1016/j.jclepro.2017.05.078
- Djekic I, Miocinovic J, Tomasevic I, et al (2014) Environmental life-cycle assessment of various dairy products. *J Clean Prod* 68:64–72 . doi: 10.1016/j.jclepro.2013.12.054
- Dolman MA, Sonneveld MPW, Mollenhorst H, De Boer IJM (2014) Benchmarking the economic, environmental and societal performance of Dutch dairy farms aiming at internal recycling of nutrients. *J Clean Prod* 73:245–252 . doi: 10.1016/j.jclepro.2014.02.043
- Domingues AR, Marques P, Garcia R, et al (2015) Applying multi-criteria decision analysis to the life-cycle assessment of vehicles. *J Clean Prod* 107:749–759 . doi: 10.1016/j.jclepro.2015.05.086
- Dominguez-Ramos A, Singh B, Zhang X, et al (2015) Global warming footprint of the electrochemical reduction of carbon dioxide to formate. *J Clean Prod* 104:148–155 . doi: 10.1016/j.jclepro.2013.11.046
- Dong YH, An AK, Yan YS, Yi S (2017) Hong Kong's greenhouse gas emissions from the waste sector and its projected changes by integrated waste management facilities. *J Clean Prod* 149:690–700 . doi: 10.1016/j.jclepro.2017.02.124
- Dos Santos MFN, Battistelle RAG, Bezerra BS, Varum HSA (2014) Comparative study of the life cycle assessment of particleboards made of residues from sugarcane bagasse (*Saccharum* spp.) and pine wood shavings (*Pinus elliottii*). *J Clean Prod* 64:345–355 . doi: 10.1016/j.jclepro.2013.06.039
- Du Y, Yi Q, Li C, Liao L (2015) Life cycle oriented low-carbon operation models of machinery manufacturing industry. *J Clean Prod* 91:145–157 . doi: 10.1016/j.jclepro.2014.12.028
- Duclos L, Lupsea M, Mandil G, et al (2017) Environmental assessment of proton exchange membrane fuel cell platinum catalyst recycling. *J Clean Prod* 142:2618–2628 . doi: 10.1016/j.jclepro.2016.10.197
- Dylewski R, Adamczyk J (2014) The comparison of thermal insulation types of plaster with cement plaster. *J Clean Prod* 83:256–262 . doi: 10.1016/j.jclepro.2014.07.042
- Dylewski R, Adamczyk J (2016b) The environmental impacts of thermal insulation of buildings including the categories of damage: A Polish case study. *J Clean Prod* 137:878–887 . doi: 10.1016/j.jclepro.2016.07.172
- Dylewski R, Adamczyk J (2016a) Study on ecological cost-effectiveness for the thermal insulation of building external vertical walls in Poland. *J Clean Prod* 133:467–478 . doi: 10.1016/j.jclepro.2016.05.155
- Dzikuć M, Tomaszewski M (2016) The effects of ecological investments in the power industry and their financial structure: A case study for Poland. *J Clean Prod* 118:48–53 . doi: 10.1016/j.jclepro.2016.01.081
- El Hanandeh A (2015) Energy recovery alternatives for the sustainable management of olive oil industry waste in Australia: Life cycle assessment. *J Clean Prod* 91:78–88 . doi: 10.1016/j.jclepro.2014.12.005

- Elduque A, Elduque D, Javierre C, et al (2015) Environmental impact analysis of the injection molding process: Analysis of the processing of high-density polyethylene parts. *J Clean Prod* 108:80–89 . doi: 10.1016/j.jclepro.2015.07.119
- Elduque D, Javierre C, Pina C, et al (2014) Life cycle assessment of a domestic induction hob: Electronic boards. *J Clean Prod* 76:74–84 . doi: 10.1016/j.jclepro.2014.04.009
- Erses Yay AS (2015) Application of life cycle assessment (LCA) for municipal solid waste management: A case study of Sakarya. *J Clean Prod* 94:284–293 . doi: 10.1016/j.jclepro.2015.01.089
- Essoua EGG, Beauregard R, Amor B, et al (2017) Evaluation of environmental impacts of citric acid and glycerol outdoor softwood treatment: Case-study. *J Clean Prod* 164:1507–1518 . doi: 10.1016/j.jclepro.2017.06.125
- Esteves VPP, Esteves EMM, Bungenstab DJ, et al (2017) Assessment of greenhouse gases (GHG) emissions from the tallow biodiesel production chain including land use change (LUC). *J Clean Prod* 151:578–591 . doi: 10.1016/j.jclepro.2017.03.063
- Evangelista BL, Rosado LP, Penteadó CSG (2018) Life cycle assessment of concrete paving blocks using electric arc furnace slag as natural coarse aggregate substitute. *J Clean Prod* 178:176–185 . doi: 10.1016/j.jclepro.2018.01.007
- Evangelisti S, Tagliaferri C, Clift R, et al (2015) Life cycle assessment of conventional and two-stage advanced energy-from-waste technologies for municipal solid waste treatment. *J Clean Prod* 100:212–223 . doi: 10.1016/j.jclepro.2015.03.062
- Fan B, Hu M, Wang H, et al (2017a) Get in sanitation 2.0 by opportunity of rural China: Scheme, simulating application and life cycle assessment. *J Clean Prod* 147:86–95 . doi: 10.1016/j.jclepro.2017.01.093
- Fan Y, Qiao Q, Fang L, Yao Y (2017b) Emergy analysis on industrial symbiosis of an industrial park – A case study of Hefei economic and technological development area. *J Clean Prod* 141:791–798 . doi: 10.1016/j.jclepro.2016.09.159
- Farmery A, Gardner C, Green BS, et al (2015) Life cycle assessment of wild capture prawns: Expanding sustainability considerations in the Australian Northern Prawn Fishery. *J Clean Prod* 87:96–104 . doi: 10.1016/j.jclepro.2014.10.063
- Farmery A, Gardner C, Green BS, Jennings S (2014) Managing fisheries for environmental performance: The effects of marine resource decision-making on the footprint of seafood. *J Clean Prod* 64:368–376 . doi: 10.1016/j.jclepro.2013.10.016
- Fei F, Wen Z, Huang S, De Clercq D (2018) Mechanical biological treatment of municipal solid waste: Energy efficiency, environmental impact and economic feasibility analysis. *J Clean Prod* 178:731–739 . doi: 10.1016/j.jclepro.2018.01.060
- Feiferyte A, Dvarioniene J, Gumbyte M (2015) Assessment of properties and life cycle of biosynthetic oil. *J Clean Prod* 95:281–290 . doi: 10.1016/j.jclepro.2015.02.044
- Feijoo S, González-García S, Lema JM, Moreira MT (2017) Life cycle assessment of  $\beta$ -Galactosidase enzyme production. *J Clean Prod* 165:204–212 . doi: 10.1016/j.jclepro.2017.07.076
- Fernández-Nava Y, Del Río J, Rodríguez-Iglesias J, et al (2014) Life cycle assessment of different municipal solid waste management options: A case study of Asturias (Spain). *J Clean Prod* 81:178–189 . doi: 10.1016/j.jclepro.2014.06.008
- Ferrández-García A, Ibáñez-Forés V, Bovea MD (2016) Eco-efficiency analysis of the life cycle of interior partition walls: A comparison of alternative solutions. *J Clean Prod* 112:649–665 . doi: 10.1016/j.jclepro.2015.07.136
- Ferrari AM, Pini M, Sassi D, et al (2018) Effects of grape quality on the environmental profile of an Italian vineyard for Lambrusco red wine production. *J Clean Prod* 172:3760–3769 . doi: 10.1016/j.jclepro.2017.06.241
- Ferreira G, López-Sabirón AM, Aranda J, et al (2015) Environmental analysis for identifying challenges to recover used reinforced refractories in industrial furnaces. *J Clean Prod* 88:242–253 . doi: 10.1016/j.jclepro.2014.04.087
- Ferreira H, Leite MGP (2015) A Life Cycle Assessment study of iron ore mining. *J Clean Prod* 108:1081–1091 . doi: 10.1016/j.jclepro.2015.05.140

- Ferreira VJ, Sáez-De-Guinoa Vilaplana A, García-Armingol T, et al (2016) Evaluation of the steel slag incorporation as coarse aggregate for road construction: Technical requirements and environmental impact assessment. *J Clean Prod* 130:175–186 . doi: 10.1016/j.jclepro.2015.08.094
- Ferro FS, Silva DAL, Rocco Lahr FA, et al (2018) Environmental aspects of oriented strand boards production. A Brazilian case study. *J Clean Prod* 183:710–719 . doi: 10.1016/j.jclepro.2018.02.174
- Filimonau V, Dickinson J, Robbins D (2014) The carbon impact of short-haul tourism: A case study of UK travel to Southern France using life cycle analysis. *J Clean Prod* 64:628–638 . doi: 10.1016/j.jclepro.2013.07.052
- Filleti RAP, Silva DAL, Silva EJ da, Ometto AR (2017) Productive and environmental performance indicators analysis by a combined LCA hybrid model and real-time manufacturing process monitoring: A grinding unit process application. *J Clean Prod* 161:510–523 . doi: 10.1016/j.jclepro.2017.05.158
- Finnegan W, Goggins J, Clifford E, Zhan X (2017) Global warming potential associated with dairy products in the Republic of Ireland. *J Clean Prod* 163:262–273 . doi: 10.1016/j.jclepro.2015.08.025
- Flor FJ, Leiva FJ, García J, et al (2017) Environmental impact of oak barrels production in Qualified Designation of Origin of Rioja. *J Clean Prod* 167:208–217 . doi: 10.1016/j.jclepro.2017.08.190
- Foelster AS, Andrew S, Kroeger L, et al (2016) Electronics recycling as an energy efficiency measure - A Life Cycle Assessment (LCA) study on refrigerator recycling in Brazil. *J Clean Prod* 129:30–42 . doi: 10.1016/j.jclepro.2016.04.126
- Forleo MB, Palmieri N, Suardi A, et al (2018) The eco-efficiency of rapeseed and sunflower cultivation in Italy. Joining environmental and economic assessment. *J Clean Prod* 172:3138–3153 . doi: 10.1016/j.jclepro.2017.11.094
- Foteinis S, Chatzisymsone E (2016) Life cycle assessment of organic versus conventional agriculture. A case study of lettuce cultivation in Greece. *J Clean Prod* 112:2462–2471 . doi: 10.1016/j.jclepro.2015.09.075
- Fraile-Garcia E, Ferreira-Cabello J, Martinez-Camara E, Jimenez-Macias E (2017) Repercussion the use phase in the life cycle assessment of structures in residential buildings using one-way slabs. *J Clean Prod* 143:191–199 . doi: 10.1016/j.jclepro.2016.12.130
- Fu Y, Liu X, Yuan Z (2015) Life-cycle assessment of multi-crystalline photovoltaic (PV) systems in China. *J Clean Prod* 86:180–190 . doi: 10.1016/j.jclepro.2014.07.057
- Fugiel A, Burchart-Korol D, Czaplicka-Kolarz K, Smoliński A (2017) Environmental impact and damage categories caused by air pollution emissions from mining and quarrying sectors of European countries. *J Clean Prod* 143:159–168 . doi: 10.1016/j.jclepro.2016.12.136
- Fusi A, Guidetti R, Azapagic A (2016) Evaluation of environmental impacts in the catering sector: The case of pasta. *J Clean Prod* 132:146–160 . doi: 10.1016/j.jclepro.2015.07.074
- Gamage JR, DeSilva AKM, Harrison CS, Harrison DK (2016) Process level environmental performance of electrodischarge machining of aluminium (3003) and steel (AISI P20). *J Clean Prod* 137:291–299 . doi: 10.1016/j.jclepro.2016.07.090
- Gan VJL, Cheng JCP, Lo IMC (2016) Integrating life cycle assessment and multi-objective optimization for economical and environmentally sustainable supply of aggregate. *J Clean Prod* 113:76–85 . doi: 10.1016/j.jclepro.2015.11.092
- Gao F, Nie Z, Yang D, et al (2018) Environmental impacts analysis of titanium sponge production using Kroll process in China. *J Clean Prod* 174:771–779 . doi: 10.1016/j.jclepro.2017.09.240
- García-Durañona L, Farreny R, Navarro P, Boschmonart-Rives J (2016) Life Cycle Assessment of a coniferous wood supply chain for pallet production in Catalonia, Spain. *J Clean Prod* 137:178–188 . doi: 10.1016/j.jclepro.2016.07.032
- García-Gusano D, Garraín D, Herrera I, et al (2015) Life Cycle Assessment of applying CO<sub>2</sub> post-combustion capture to the Spanish cement production. *J Clean Prod* 104:328–338 . doi: 10.1016/j.jclepro.2013.11.056
- García N, Fernández-Torres MJ, Caballero JA (2014) Simultaneous environmental and economic process synthesis of isobutane alkylation. *J Clean Prod* 81:270–280 . doi: 10.1016/j.jclepro.2014.06.016
- García R, Freire F (2014) Carbon footprint of particleboard: A comparison between ISO/TS 14067, GHG Protocol, PAS 2050 and Climate Declaration. *J Clean Prod* 66:199–209 . doi: 10.1016/j.jclepro.2013.11.073

- Garfí M, Cadena E, Sanchez-Ramos D, Ferrer I (2016) Life cycle assessment of drinking water: Comparing conventional water treatment, reverse osmosis and mineral water in glass and plastic bottles. *J Clean Prod* 137:997–1003 . doi: 10.1016/j.jclepro.2016.07.218
- Garrido R, Silvestre JD, Flores-Colen I (2017) Economic and Energy Life Cycle Assessment of aerogel-based thermal renders. *J Clean Prod* 151:537–545 . doi: 10.1016/j.jclepro.2017.02.194
- Garrido T, Etxabide A, Leceta I, et al (2014) Valorization of soya by-products for sustainable packaging. *J Clean Prod* 64:228–233 . doi: 10.1016/j.jclepro.2013.07.027
- Gentile AA, Rocco C, Modeo S, Romano T (2014) Gold recovery from thin film deposition facilities: Environmental aspects of a novel method. *J Clean Prod* 83:473–482 . doi: 10.1016/j.jclepro.2014.07.077
- Ghimire SR, Johnston JM, Ingwersen WW, Sojka S (2017) Life cycle assessment of a commercial rainwater harvesting system compared with a municipal water supply system. *J Clean Prod* 151:74–86 . doi: 10.1016/j.jclepro.2017.02.025
- Giagnorio M, Amelio A, Grüttner H, Tiraferri A (2017) Environmental impacts of detergents and benefits of their recovery in the laundering industry. *J Clean Prod* 154:593–601 . doi: 10.1016/j.jclepro.2017.04.012
- Gialos AA, Zeimpekis V, Alexopoulos ND, et al (2018) Investigating the impact of sustainability in the production of aeronautical subscale components. *J Clean Prod* 176:785–799 . doi: 10.1016/j.jclepro.2017.12.151
- Giamia E, Papadopoulos AM (2015) Assessment tools for the environmental evaluation of concrete, plaster and brick elements production. *J Clean Prod* 99:75–85 . doi: 10.1016/j.jclepro.2015.03.006
- Gilardino A, Rojas J, Mattos H, et al (2017) Combining operational research and Life Cycle Assessment to optimize municipal solid waste collection in a district in Lima (Peru). *J Clean Prod* 156:589–603 . doi: 10.1016/j.jclepro.2017.04.005
- Goglio P, Smith WN, Worth DE, et al (2018) Development of Crop.LCA, an adaptable screening life cycle assessment tool for agricultural systems: A Canadian scenario assessment. *J Clean Prod* 172:3770–3780 . doi: 10.1016/j.jclepro.2017.06.175
- Gong Y, Yu Y, Huang K, et al (2018) Evaluation of lithium-ion batteries through the simultaneous consideration of environmental, economic and electrochemical performance indicators. *J Clean Prod* 170:915–923 . doi: 10.1016/j.jclepro.2017.09.189
- Gontia P, Janssen M (2016) Life cycle assessment of bio-based sodium polyacrylate production from pulp mill side streams: Case study of thermo-mechanical and sulfite pulp mills. *J Clean Prod* 131:475–484 . doi: 10.1016/j.jclepro.2016.04.155
- González-García S, Belo S, Dias AC, et al (2015) Life cycle assessment of pigmeat production: Portuguese case study and proposal of improvement options. *J Clean Prod* 100:126–139 . doi: 10.1016/j.jclepro.2015.03.048
- González-García S, Gomez-Fernández Z, Dias AC, et al (2014a) Life Cycle Assessment of broiler chicken production: A Portuguese case study. *J Clean Prod* 74:125–134 . doi: 10.1016/j.jclepro.2014.03.067
- González-García S, Gullón B, Rivas S, et al (2016) Environmental performance of biomass refining into high-added value compounds. *J Clean Prod* 120:170–180 . doi: 10.1016/j.jclepro.2016.02.015
- González-García S, Moreira MT, Dias AC, Mola-Yudego B (2014b) Cradle-to-gate Life Cycle Assessment of forest operations in Europe: Environmental and energy profiles. *J Clean Prod* 66:188–198 . doi: 10.1016/j.jclepro.2013.11.067
- Grönman K, Ypyä J, Virtanen Y, et al (2016) Nutrient footprint as a tool to evaluate the nutrient balance of a food chain. *J Clean Prod* 112:2429–2440 . doi: 10.1016/j.jclepro.2015.09.129
- Guarino S, Ucciardello N, Venettacci S, Genna S (2017) Life cycle assessment of a new graphene-based electrodeposition process on copper components. *J Clean Prod* 165:520–529 . doi: 10.1016/j.jclepro.2017.07.168
- Guimarães da Silva M, Costa Muniz AR, Hoffmann R, Luz Lisboa AC (2018) Impact of greenhouse gases on surface coal mining in Brazil. *J Clean Prod* 193:206–216 . doi: 10.1016/j.jclepro.2018.05.076
- Guo Z, Hu D, Zhang Z, et al (2017) Material metabolism and lifecycle GHG emissions of urban road system (URS). *J Clean Prod* 165:243–253 . doi: 10.1016/j.jclepro.2017.07.138

- Gursel AP, Maryman H, Ostertag C (2016) A life-cycle approach to environmental, mechanical, and durability properties of “green” concrete mixes with rice husk ash. *J Clean Prod* 112:823–836 . doi: 10.1016/j.jclepro.2015.06.029
- Hajjaji N, Houas A, Pons MN (2016) Thermodynamic feasibility and life cycle assessment of hydrogen production via reforming of poultry fat. *J Clean Prod* 134:600–612 . doi: 10.1016/j.jclepro.2015.12.018
- Hamut HS, Dincer I, Naterer GF (2014) Exergoenvironmental analysis of hybrid electric vehicle thermal management systems. *J Clean Prod* 67:187–196 . doi: 10.1016/j.jclepro.2013.12.041
- Han B, Wang R, Yao L, et al (2015a) Life cycle assessment of ceramic façade material and its comparative analysis with three other common façade materials. *J Clean Prod* 99:86–93 . doi: 10.1016/j.jclepro.2015.03.032
- Han HS, Oneil E, Bergman RD, et al (2015b) Cradle-to-gate life cycle impacts of redwood forest resource harvesting in northern California. *J Clean Prod* 99:217–219 . doi: 10.1016/j.jclepro.2015.02.088
- Handler RM, Shonnard DR, Lautala P, et al (2014) Environmental impacts of roundwood supply chain options in Michigan: Life-cycle assessment of harvest and transport stages. *J Clean Prod* 76:64–73 . doi: 10.1016/j.jclepro.2014.04.040
- Hanssen OJ, Vold M, Schakenda V, et al (2017) Environmental profile, packaging intensity and food waste generation for three types of dinner meals. *J Clean Prod* 142:395–402 . doi: 10.1016/j.jclepro.2015.12.012
- Harris TM, Hottle TA, Soratana K, et al (2016) Life cycle assessment of sunflower cultivation on abandoned mine land for biodiesel production. *J Clean Prod* 112:182–195 . doi: 10.1016/j.jclepro.2015.09.057
- Hasheminasab H, Gholipour Y, Kharrazi M, Streimikiene D (2018) A novel Metric of Sustainability for petroleum refinery projects. *J Clean Prod* 171:1215–1224 . doi: 10.1016/j.jclepro.2017.09.223
- Hassard HA, Couch MH, Techa-Erawan T, Mclellan BC (2014) Product carbon footprint and energy analysis of alternative coffee products in Japan. *J Clean Prod* 73:310–321 . doi: 10.1016/j.jclepro.2014.02.006
- He X, Qiao Y, Liang L, et al (2018) Environmental life cycle assessment of long-term organic rice production in subtropical China. *J Clean Prod* 176:880–888 . doi: 10.1016/j.jclepro.2017.12.045
- He X, Qiao Y, Liu Y, et al (2016) Environmental impact assessment of organic and conventional tomato production in urban greenhouses of Beijing city, China. *J Clean Prod* 134:251–258 . doi: 10.1016/j.jclepro.2015.12.004
- He Y, Huang T, Wang Y, et al (2017) A new lightweight design method integrating shape optimization with life cycle assessment for extrusion dies. *J Clean Prod* 150:47–57 . doi: 10.1016/j.jclepro.2017.02.186
- Head M, Sevenster M, Odegard I, et al (2014) Life cycle impacts of protein-rich foods: Creating robust yet extensive life cycle models for use in a consumer app. *J Clean Prod* 73:165–174 . doi: 10.1016/j.jclepro.2013.11.026
- Heath A, Paine K, McManus M (2014) Minimising the global warming potential of clay based geopolymers. *J Clean Prod* 78:75–83 . doi: 10.1016/j.jclepro.2014.04.046
- Helbig C, Gemechu ED, Pillain B, et al (2016) Extending the geopolitical supply risk indicator: Application of life cycle sustainability assessment to the petrochemical supply chain of polyacrylonitrile-based carbon fibers. *J Clean Prod* 137:1170–1178 . doi: 10.1016/j.jclepro.2016.07.214
- Hickenbottom KL, Miller-Robbie L, Vanneste J, et al (2018) Comparative life-cycle assessment of a novel osmotic heat engine and an organic Rankine cycle for energy production from low-grade heat. *J Clean Prod* 191:490–501 . doi: 10.1016/j.jclepro.2018.04.106
- Hoang HM, Brown T, Indergard E, et al (2016) Life cycle assessment of salmon cold chains: Comparison between chilling and superchilling technologies. *J Clean Prod* 126:363–372 . doi: 10.1016/j.jclepro.2016.03.049
- Hochschorner E, Dán G, Moberg Å (2015) Carbon footprint of movie distribution via the internet: A Swedish case study. *J Clean Prod* 87:197–207 . doi: 10.1016/j.jclepro.2014.09.012
- Hong J, Chen W, Wang Y, et al (2014) Life cycle assessment of caustic soda production: A case study in China. *J Clean Prod* 66:113–120 . doi: 10.1016/j.jclepro.2013.10.009
- Hong J, Shen GQ, Mao C, et al (2016) Life-cycle energy analysis of prefabricated building components: An input-output-based hybrid model. *J Clean Prod* 112:2198–2207 . doi: 10.1016/j.jclepro.2015.10.030



- Horton P, Koh L, Guang VS (2016) An integrated theoretical framework to enhance resource efficiency, sustainability and human health in agri-food systems. *J Clean Prod* 120:164–169 . doi: 10.1016/j.jclepro.2015.08.092
- Hosseinian SM, Nezamoleslami R (2018) Water footprint and virtual water assessment in cement industry: A case study in Iran. *J Clean Prod* 172:2454–2463 . doi: 10.1016/j.jclepro.2017.11.164
- Hrvoje M, Klemes JJJ, Vujanovic M, et al (2016) Reducing greenhouse gasses emissions by fostering the deployment of alternative raw materials and energy sources in the cleaner cement manufacturing process. *J Clean Prod* 136:119–132
- Huang B, Mauerhofer V (2016) Life cycle sustainability assessment of ground source heat pump in Shanghai, China. *J Clean Prod* 119:207–214 . doi: 10.1016/j.jclepro.2015.08.048
- Huang L, Bohne RA, Bruland A, et al (2015) Environmental impact of drill and blast tunnelling: Life cycle assessment. *J Clean Prod* 86:110–117 . doi: 10.1016/j.jclepro.2014.08.083
- Huysman S, Schaubroeck T, Goralczyk M, et al (2016) Quantifying the environmental impacts of a European citizen through a macro-economic approach, a focus on climate change and resource consumption. *J Clean Prod* 124:217–225 . doi: 10.1016/j.jclepro.2016.02.098
- Iannone R, Miranda S, Riemma S, De Marco I (2016) Improving environmental performances in wine production by a life cycle assessment analysis. *J Clean Prod* 111:172–180 . doi: 10.1016/j.jclepro.2015.04.006
- Ikhlayel M (2018) Development of management systems for sustainable municipal solid waste in developing countries: a systematic life cycle thinking approach. *J Clean Prod* 180:571–586 . doi: 10.1016/j.jclepro.2018.01.057
- Ingarao G, Deng Y, Marino R, et al (2016a) Energy and CO<sub>2</sub> life cycle inventory issues for aluminum based components: The case study of a high speed train window panel. *J Clean Prod* 126:493–503 . doi: 10.1016/j.jclepro.2016.03.070
- Ingarao G, Priarone PC, Deng Y, Paraskevas D (2018) Environmental modelling of aluminium based components manufacturing routes: Additive manufacturing versus machining versus forming. *J Clean Prod* 176:261–275 . doi: 10.1016/j.jclepro.2017.12.115
- Ingarao G, Priarone PC, Di Lorenzo R, Settineri L (2016b) A methodology for evaluating the influence of batch size and part geometry on the environmental performance of machining and forming processes. *J Clean Prod* 135:1611–1622 . doi: 10.1016/j.jclepro.2015.11.041
- Ingarao G, Priarone PC, Gagliardi F, et al (2015) Subtractive versus mass conserving metal shaping technologies: An environmental impact comparison. *J Clean Prod* 87:862–873 . doi: 10.1016/j.jclepro.2014.10.018
- Ingrao C, Licciardello F, Pecorino B, et al (2018) Energy and environmental assessment of a traditional durum-wheat bread. *J Clean Prod* 171:1494–1509 . doi: 10.1016/j.jclepro.2017.09.283
- Ingrao C, Lo Giudice A, Tricase C, et al (2014) The use of basalt aggregates in the production of concrete for the prefabrication industry: Environmental impact assessment, interpretation and improvement. *J Clean Prod* 75:195–204 . doi: 10.1016/j.jclepro.2014.04.002
- Invidiata A, Ghisi E (2016) Life-cycle energy and cost analyses of window shading used to improve the thermal performance of houses. *J Clean Prod* 133:1371–1383 . doi: 10.1016/j.jclepro.2016.06.072
- Iraldo F, Facheris C, Nucci B (2017) Is product durability better for environment and for economic efficiency? A comparative assessment applying LCA and LCC to two energy-intensive products. *J Clean Prod* 140:1353–1364 . doi: 10.1016/j.jclepro.2016.10.017
- Iribarren D, Marvuglia A, Hild P, et al (2015) Life cycle assessment and data envelopment analysis approach for the selection of building components according to their environmental impact efficiency: A case study for external walls. *J Clean Prod* 87:707–716 . doi: 10.1016/j.jclepro.2014.10.073
- Iribarren D, Susmozas A, Petrakopoulou F, Dufour J (2014) Environmental and exergetic evaluation of hydrogen production via lignocellulosic biomass gasification. *J Clean Prod* 69:165–175 . doi: 10.1016/j.jclepro.2014.01.068
- Iritani DR, Silva DAL, Saavedra YMB, et al (2015) Sustainable strategies analysis through Life Cycle Assessment: A case study in a furniture industry. *J Clean Prod* 96:308–318 . doi: 10.1016/j.jclepro.2014.05.029

- Jafari M, Asgharipour MR, Ramroudi M, et al (2018) Sustainability assessment of date and pistachio agricultural systems using energy, emergy and economic approaches. *J Clean Prod* 193:642–651 . doi: 10.1016/j.jclepro.2018.05.089
- Jamieson E, McLellan B, Van Riessen A, Nikraz H (2015) Comparison of embodied energies of Ordinary Portland Cement with Bayer-derived geopolymers. *J Clean Prod* 99:112–118 . doi: 10.1016/j.jclepro.2015.03.008
- Jawjit W, Pavasant P, Kroeze C (2015) Evaluating environmental performance of concentrated latex production in Thailand. *J Clean Prod* 98:84–91 . doi: 10.1016/j.jclepro.2013.11.016
- Jensen JK, Govindan K (2014) Assessment of renewable bioenergy application: A case in the food supply chain industry. *J Clean Prod* 66:254–263 . doi: 10.1016/j.jclepro.2013.11.060
- Jianyi L, Yuanchao H, Shenghui C, et al (2015) Carbon footprints of food production in China (1979-2009). *J Clean Prod* 90:97–103 . doi: 10.1016/j.jclepro.2014.11.072
- Jradi S, Chameeva TB, Delhomme B, Jaegler A (2018) Tracking carbon footprint in French vineyards: A DEA performance assessment. *J Clean Prod* 192:43–54 . doi: 10.1016/j.jclepro.2018.04.216
- Jung J, Postels S, Bardow A (2014) Cleaner chlorine production using oxygen depolarized cathodes? A life cycle assessment. *J Clean Prod* 80:46–56 . doi: 10.1016/j.jclepro.2014.05.086
- Kalbar PP, Karmakar S, Asolekar SR (2016) Life cycle-based decision support tool for selection of wastewater treatment alternatives. *J Clean Prod* 117:64–72 . doi: 10.1016/j.jclepro.2016.01.036
- Kalbusch A, Ghisi E (2016) Comparative life-cycle assessment of ordinary and water-saving taps. *J Clean Prod* 112:4585–4593 . doi: 10.1016/j.jclepro.2015.06.075
- Kanbur BB, Xiang L, Dubey S, et al (2018) Life cycle-based enviroeconomic and thermal analyses of the inlet air-cooled microturbine systems with liquefied natural gas cold energy. *J Clean Prod* 174:1338–1350 . doi: 10.1016/j.jclepro.2017.11.046
- Khatri P, Jain S, Pandey S (2017) A cradle-to-gate assessment of environmental impacts for production of mustard oil using life cycle assessment approach. *J Clean Prod* 166:988–997 . doi: 10.1016/j.jclepro.2017.08.109
- Khoshnevisan B, Bolandnazar E, Shamshirband S, et al (2015) Decreasing environmental impacts of cropping systems using life cycle assessment (LCA) and multi-objective genetic algorithm. *J Clean Prod* 86:67–77 . doi: 10.1016/j.jclepro.2014.08.062
- Khoshnevisan B, Rafiee S, Omid M, et al (2014) Environmental impact assessment of tomato and cucumber cultivation in greenhouses using life cycle assessment and adaptive neuro-fuzzy inference system. *J Clean Prod* 73:183–192 . doi: 10.1016/j.jclepro.2013.09.057
- Kim MH, Song HB (2014) Analysis of the global warming potential for wood waste recycling systems. *J Clean Prod* 69:199–207 . doi: 10.1016/j.jclepro.2014.01.039
- Kolotzek C, Helbig C, Thorenz A, et al (2018) A company-oriented model for the assessment of raw material supply risks, environmental impact and social implications. *J Clean Prod* 176:566–580 . doi: 10.1016/j.jclepro.2017.12.162
- Kong Z, Dong X, Liu G (2016) Coal-based synthetic natural gas vs. imported natural gas in China: A net energy perspective. *J Clean Prod* 131:690–701 . doi: 10.1016/j.jclepro.2016.04.111
- Korol J, Burchart-Korol D, Pichlak M (2016) Expansion of environmental impact assessment for eco-efficiency evaluation of biocomposites for industrial application. *J Clean Prod* 113:144–152 . doi: 10.1016/j.jclepro.2015.11.101
- Kouchaki-Penchah H, Sharifi M, Mousazadeh H, et al (2016) Gate to gate life cycle assessment of flat pressed particleboard production in Islamic Republic of Iran. *J Clean Prod* 112:343–350 . doi: 10.1016/j.jclepro.2015.07.056
- Krzyżaniak M, Stolarski MJ, Warmiński K (2018) Life cycle assessment of Virginia mallow production with different fertilisation options. *J Clean Prod* 177:824–836 . doi: 10.1016/j.jclepro.2017.12.275
- Kunanuntakij K, Varabuntoonvit V, Vorayos N, et al (2017) Thailand Green GDP assessment based on environmentally extended input-output model. *J Clean Prod* 167:970–977 . doi: 10.1016/j.jclepro.2017.02.106

- Kurad R, Silvestre JD, de Brito J, Ahmed H (2017) Effect of incorporation of high volume of recycled concrete aggregates and fly ash on the strength and global warming potential of concrete. *J Clean Prod* 166:485–502 . doi: 10.1016/j.jclepro.2017.07.236
- Kwofie EM, Ngadi M (2017) A comparative lifecycle assessment of rural parboiling system and an integrated steaming and drying system fired with rice husk. *J Clean Prod* 140:622–630 . doi: 10.1016/j.jclepro.2016.06.008
- Kylili A, Fokaides PA, Ioannides A, Kalogirou S (2018) Environmental assessment of solar thermal systems for the industrial sector. *J Clean Prod* 176:99–109 . doi: 10.1016/j.jclepro.2017.12.150
- Lacasa E, Santolaya JL, Biedermann A (2016) Obtaining sustainable production from the product design analysis. *J Clean Prod* 139:706–716 . doi: 10.1016/j.jclepro.2016.08.078
- Lam CM, Lee PH, Hsu SC (2016) Eco-efficiency analysis of sludge treatment scenarios in urban cities: The case of Hong Kong. *J Clean Prod* 112:3028–3039 . doi: 10.1016/j.jclepro.2015.10.125
- Lam L, Kurisu K, Hanaki K (2015) Comparative environmental impacts of source-separation systems for domestic wastewater management in rural China. *J Clean Prod* 104:185–198 . doi: 10.1016/j.jclepro.2015.04.126
- Lares-Orozco MF, Robles-Morúa A, Yopez EA, Handler RM (2016) Global warming potential of intensive wheat production in the Yaqui Valley, Mexico: a resource for the design of localized mitigation strategies. *J Clean Prod* 127:522–532 . doi: 10.1016/j.jclepro.2016.03.128
- Laso J, Margallo M, Fullana P, et al (2017) Introducing life cycle thinking to define best available techniques for products: Application to the anchovy canning industry. *J Clean Prod* 155:139–150 . doi: 10.1016/j.jclepro.2016.08.040
- Laurenti R, Sinha R, Singh J, Frostell B (2015) Some pervasive challenges to sustainability by design of electronic products - A conceptual discussion. *J Clean Prod* 108:281–288 . doi: 10.1016/j.jclepro.2015.08.041
- Lazzerini G, Lucchetti S, Nicese FP (2016) Green House Gases(GHG) emissions from the ornamental plant nursery industry: A Life Cycle Assessment(LCA) approach in a nursery district in central Italy. *J Clean Prod* 112:4022–4030 . doi: 10.1016/j.jclepro.2015.08.065
- Le Duigou A, Baley C (2014) Coupled micromechanical analysis and life cycle assessment as an integrated tool for natural fibre composites development. *J Clean Prod* 83:61–69 . doi: 10.1016/j.jclepro.2014.07.027
- Le VT, Paris H, Mandil G (2017) Environmental impact assessment of an innovative strategy based on an additive and subtractive manufacturing combination. *J Clean Prod* 164:508–523 . doi: 10.1016/j.jclepro.2017.06.204
- Leceta I, Etxabide A, Cabezudo S, et al (2014) Bio-based films prepared with by-products and wastes: Environmental assessment. *J Clean Prod* 64:218–227 . doi: 10.1016/j.jclepro.2013.07.054
- Lee CK, Lee JY, Choi YH, Lee KM (2016) Application of the integrated ecodesign method using the GHG emission as a single indicator and its GHG recyclability. *J Clean Prod* 112:1692–1699 . doi: 10.1016/j.jclepro.2014.10.081
- Lee M, Den W (2016) Life cycle value analysis for sustainability evaluation of bioenergy products. *J Clean Prod* 113:541–547 . doi: 10.1016/j.jclepro.2015.11.073
- Leejarkpai T, Mungcharoen T, Suwanmanee U (2016) Comparative assessment of global warming impact and eco-efficiency of PS (polystyrene), PET (polyethylene terephthalate) and PLA (polylactic acid) boxes. *J Clean Prod* 125:95–107 . doi: 10.1016/j.jclepro.2016.03.029
- Lehtoranta S, Vilpas R, Mattila TJ (2014) Comparison of carbon footprints and eutrophication impacts of rural on-site wastewater treatment plants in Finland. *J Clean Prod* 65:439–446 . doi: 10.1016/j.jclepro.2013.08.024
- Leinonen I, Williams AG, Kyriazakis I (2016) Comparing the environmental impacts of UK Turkey production systems using analytical error propagation in uncertainty analysis. *J Clean Prod* 112:141–148 . doi: 10.1016/j.jclepro.2015.06.024
- Leon J, Aliaga C, Boulougouris G, et al (2015) Quantifying GHG emissions savings potential in magazine paper production: a case study on supercalendered and light-weight coated papers. *J Clean Prod* 103:301–308 . doi: 10.1016/j.jclepro.2014.03.008

- Leonzio G (2016a) Mathematical modeling and environmental analysis of heat pumps integrated in a process to treat spent pickling liquors. *J Clean Prod* 133:835–849 . doi: 10.1016/j.jclepro.2016.05.185
- Leonzio G (2016b) Upgrading of biogas to bio-methane with chemical absorption process: Simulation and environmental impact. *J Clean Prod* 131:364–375 . doi: 10.1016/j.jclepro.2016.05.020
- Li C, Nie Z, Cui S, et al (2014) The life cycle inventory study of cement manufacture in China. *J Clean Prod* 72:204–211 . doi: 10.1016/j.jclepro.2014.02.048
- Li H, Yang S, Zhang J, Qian Y (2016a) Coal-based synthetic natural gas (SNG) for municipal heating in China: Analysis of haze pollutants and greenhouse gases (GHGs) emissions. *J Clean Prod* 112:1350–1359 . doi: 10.1016/j.jclepro.2015.04.078
- Li H, Yang Z, Liu G, et al (2017a) Analyzing virtual water pollution transfer embodied in economic activities based on gray water footprint: A case study. *J Clean Prod* 161:1064–1073 . doi: 10.1016/j.jclepro.2017.05.155
- Li L, Chen K (2017) Quantitative assessment of carbon dioxide emissions in construction projects: A case study in Shenzhen. *J Clean Prod* 141:394–408 . doi: 10.1016/j.jclepro.2016.09.134
- Li X, Qiao Y, Li H, Gao X (2016b) Life cycle assessment of structured corrugation SiC-foam packing. *J Clean Prod* 133:54–64 . doi: 10.1016/j.jclepro.2016.05.087
- Li X, Song Z, Wang T, et al (2016c) Health impacts of construction noise on workers: A quantitative assessment model based on exposure measurement. *J Clean Prod* 135:721–731 . doi: 10.1016/j.jclepro.2016.06.100
- Li Z, Sui P, Yang X, et al (2017b) Balancing GHG mitigation and food security through agricultural recycling systems: Case studies in the North China Plain. *J Clean Prod* 157:222–231 . doi: 10.1016/j.jclepro.2017.04.136
- Lijó L, González-García S, Bacenetti J, et al (2014) Assuring the sustainable production of biogas from anaerobic mono-digestion. *J Clean Prod* 72:23–34 . doi: 10.1016/j.jclepro.2014.03.022
- Linkosalmi L, Husgafvel R, Fomkin A, et al (2016) Main factors influencing greenhouse gas emissions of wood-based furniture industry in Finland. *J Clean Prod* 113:596–605 . doi: 10.1016/j.jclepro.2015.11.091
- Litskas VD, Irakleous T, Tzortzakis N, Stavrinides MC (2017) Determining the carbon footprint of indigenous and introduced grape varieties through Life Cycle Assessment using the island of Cyprus as a case study. *J Clean Prod* 156:418–425 . doi: 10.1016/j.jclepro.2017.04.057
- Liu H, Wang X, Yang J, et al (2017a) The ecological footprint evaluation of low carbon campuses based on life cycle assessment: A case study of Tianjin, China. *J Clean Prod* 144:266–278 . doi: 10.1016/j.jclepro.2017.01.017
- Liu J, Yang D, Lu B, Zhang J (2016a) Carbon footprint of laptops for export from China: Empirical results and policy implications. *J Clean Prod* 113:674–680 . doi: 10.1016/j.jclepro.2015.11.026
- Liu M, Wang Y, Wu Y, et al (2018) “Greener” adhesives composed of urea-formaldehyde resin and cottonseed meal for wood-based composites. *J Clean Prod* 187:361–371 . doi: 10.1016/j.jclepro.2018.03.239
- Liu Y, Ni Z, Kong X, Liu J (2017b) Greenhouse gas emissions from municipal solid waste with a high organic fraction under different management scenarios. *J Clean Prod* 147:451–457 . doi: 10.1016/j.jclepro.2017.01.135
- Liu Z, Jiang Q, Li T, et al (2016b) Environmental benefits of remanufacturing: A case study of cylinder heads remanufactured through laser cladding. *J Clean Prod* 133:1027–1033 . doi: 10.1016/j.jclepro.2016.06.049
- Llorach-Massana P, Farreny R, Oliver-Solà J (2015) Are Cradle to Cradle certified products environmentally preferable? Analysis from an LCA approach. *J Clean Prod* 93:243–250 . doi: 10.1016/j.jclepro.2015.11.008
- Llorach-Massana P, Muñoz P, Riera MR, et al (2017) N<sub>2</sub>O emissions from protected soilless crops for more precise food and urban agriculture life cycle assessments. *J Clean Prod* 149:1118–1126 . doi: 10.1016/j.jclepro.2017.02.191
- Loiseau E, Aissani L, Le Féon S, et al (2018) Territorial Life Cycle Assessment (LCA): What exactly is it about? A proposal towards using a common terminology and a research agenda. *J Clean Prod* 176:474–485 . doi: 10.1016/j.jclepro.2017.12.169
- Lonca G, Muggéo R, Imbeault-Tétreault H, et al (2018) Does material circularity rhyme with environmental efficiency? Case studies on used tires. *J Clean Prod* 183:424–435 . doi: 10.1016/j.jclepro.2018.02.108

- Lopes Silva DA, de Oliveira JA, Padovezi Filleti RA, et al (2018) Life Cycle Assessment in automotive sector: A case study for engine valves towards cleaner production. *J Clean Prod* 184:286–300 . doi: 10.1016/j.jclepro.2018.02.252
- López Gayarre F, González Pérez J, López-Colina Pérez C, et al (2016) Life cycle assessment for concrete kerbs manufactured with recycled aggregates. *J Clean Prod* 113:41–53 . doi: 10.1016/j.jclepro.2015.11.093
- Lovarelli D, Bacenetti J, Fiala M (2017) Effect of local conditions and machinery characteristics on the environmental impacts of primary soil tillage. *J Clean Prod* 140:479–491 . doi: 10.1016/j.jclepro.2016.02.011
- Lovarelli D, Ingrao C, Fiala M, Bacenetti J (2018) Beyond the Water Footprint: A new framework proposal to assess freshwater environmental impact and consumption. *J Clean Prod* 172:4189–4199 . doi: 10.1016/j.jclepro.2016.12.067
- Lu B, Du X, Huang S (2017) The economic and environmental implications of wastewater management policy in China: From the LCA perspective. *J Clean Prod* 142:3544–3557 . doi: 10.1016/j.jclepro.2016.10.113
- Luo T, Yue Q, Yan M, et al (2015) Carbon footprint of China's livestock system - A case study of farm survey in Sichuan province, China. *J Clean Prod* 102:136–143 . doi: 10.1016/j.jclepro.2015.04.077
- Lutterbeck CA, Kist LT, Lopez DR, et al (2017) Life cycle assessment of integrated wastewater treatment systems with constructed wetlands in rural areas. *J Clean Prod* 148:527–536 . doi: 10.1016/j.jclepro.2017.02.024
- Ma Y, Ke RY, Han R, Tang BJ (2017) The analysis of the battery electric vehicle's potentiality of environmental effect: A case study of Beijing from 2016 to 2020. *J Clean Prod* 145:395–406 . doi: 10.1016/j.jclepro.2016.12.131
- Maalouf C, Ingrao C, Scrucca F, et al (2018) An energy and carbon footprint assessment upon the usage of hemp-lime concrete and recycled-PET façades for office facilities in France and Italy. *J Clean Prod* 170:1640–1653 . doi: 10.1016/j.jclepro.2016.10.111
- Mah CM, Fujiwara T, Ho CS (2018) Life cycle assessment and life cycle costing toward eco-efficiency concrete waste management in Malaysia. *J Clean Prod* 172:3415–3427 . doi: 10.1016/j.jclepro.2017.11.200
- Mahbub N, Oyedun AO, Kumar A, et al (2017) A life cycle assessment of oxymethylene ether synthesis from biomass-derived syngas as a diesel additive. *J Clean Prod* 165:1249–1262 . doi: 10.1016/j.jclepro.2017.07.178
- Maia R, Silva C, Costa E (2016) Eco-efficiency assessment in the agricultural sector: the Monte Novo irrigation perimeter, Portugal. *J Clean Prod* 138:217–228 . doi: 10.1016/j.jclepro.2016.04.019
- Maier M, Mueller M, Yan X (2017) Introducing a localised spatio-temporal LCI method with wheat production as exploratory case study. *J Clean Prod* 140:492–501 . doi: 10.1016/j.jclepro.2016.07.160
- Manda BMK, Worrell E, Patel MK (2014) Innovative membrane filtration system for micropollutant removal from drinking water - Prospective environmental LCA and its integration in business decisions. *J Clean Prod* 72:153–166 . doi: 10.1016/j.jclepro.2014.02.045
- Manfredi M, Vignali G (2014) Life cycle assessment of a packaged tomato puree: A comparison of environmental impacts produced by different life cycle phases. *J Clean Prod* 73:275–284 . doi: 10.1016/j.jclepro.2013.10.010
- Mano TB, Jiménez L, Ravagnani MASS (2017) Incorporating life cycle assessment eco-costs in the optimization of heat exchanger networks. *J Clean Prod* 162:1502–1517 . doi: 10.1016/j.jclepro.2017.06.154
- Manzardo A, Mazzi A, Loss A, et al (2016) Lessons learned from the application of different water footprint approaches to compare different food packaging alternatives. *J Clean Prod* 112:4657–4666 . doi: 10.1016/j.jclepro.2015.08.019
- Marchi M, Niccolucci V, Pulselli RM, Marchettini N (2018) Environmental policies for GHG emissions reduction and energy transition in the medieval historic centre of Siena (Italy): the role of solar energy. *J Clean Prod* 185:829–840 . doi: 10.1016/j.jclepro.2018.03.068
- Marinković S, Dragaš J, Ignjatović I, Tošić N (2017) Environmental assessment of green concretes for structural use. *J Clean Prod* 154:633–649 . doi: 10.1016/j.jclepro.2017.04.015
- Martin M (2015) Quantifying the environmental performance of an industrial symbiosis network of biofuel producers. *J Clean Prod* 102:202–212 . doi: 10.1016/j.jclepro.2015.04.063

- Martínez-Blanco J, Lehmann A, Muñoz P, et al (2014a) Application challenges for the social Life Cycle Assessment of fertilizers within life cycle sustainability assessment. *J Clean Prod* 69:34–48 . doi: 10.1016/j.jclepro.2014.01.044
- Martínez-Blanco J, Rieradevall J, Antón A, Muñoz P (2014b) Multifunctionality-solving approaches of compost application in crop rotations. *J Clean Prod* 64:384–395 . doi: 10.1016/j.jclepro.2013.08.014
- Martínez-Guido SI, Sengupta D, Nápoles-Rivera F, et al (2016) Life cycle assessment for Ambrox® production from different chemical routes. *J Clean Prod* 130:202–212 . doi: 10.1016/j.jclepro.2015.11.031
- Martínez-Hernández E, Campbell GM, Sadhukhan J (2014) Economic and environmental impact marginal analysis of biorefinery products for policy targets. *J Clean Prod* 74:74–85 . doi: 10.1016/j.jclepro.2014.03.051
- Martins AA, Araújo AR, Graça A, et al (2018) Towards sustainable wine: Comparison of two Portuguese wines. *J Clean Prod* 183:662–676 . doi: 10.1016/j.jclepro.2018.02.057
- Martire S, Mirabella N, Sala S (2018) Widening the perspective in greenhouse gas emissions accounting: The way forward for supporting climate and energy policies at municipal level. *J Clean Prod* 176:842–851 . doi: 10.1016/j.jclepro.2017.12.055
- Masuda K (2016) Measuring eco-efficiency of wheat production in Japan: A combined application of life cycle assessment and data envelopment analysis. *J Clean Prod* 126:373–381 . doi: 10.1016/j.jclepro.2016.03.090
- Maucieri C, Forchino AA, Nicoletto C, et al (2018) Life cycle assessment of a micro aquaponic system for educational purposes built using recovered material. *J Clean Prod* 172:3119–3127 . doi: 10.1016/j.jclepro.2017.11.097
- Maxineasa SG, Entuc IS, Taranu N, et al (2018) Environmental performances of different timber structures for pitched roofs. *J Clean Prod* 175:164–175 . doi: 10.1016/j.jclepro.2017.12.047
- Md Yunus NSH, Chu CJ, Baharuddin AS, et al (2017) Enhanced oil recovery and lignocellulosic quality from oil palm biomass using combined pretreatment with compressed water and steam. *J Clean Prod* 142:3834–3849 . doi: 10.1016/j.jclepro.2016.10.078
- Melià P, Ruggieri G, Sabbadini S, Dotelli G (2014) Environmental impacts of natural and conventional building materials: A case study on earth plasters. *J Clean Prod* 80:179–186 . doi: 10.1016/j.jclepro.2014.05.073
- Mendoza JMF, Capitano C, Peri G, et al (2014) Environmental management of granite slab production from an industrial ecology standpoint. *J Clean Prod* 84:619–628 . doi: 10.1016/j.jclepro.2014.03.056
- Meneses M, Concepción H, Vrecko D, Vilanova R (2015) Life Cycle Assessment as an environmental evaluation tool for control strategies in wastewater treatment plants. *J Clean Prod* 107:653–661 . doi: 10.1016/j.jclepro.2015.05.057
- Meng W, Xu L, Hu B, et al (2017a) Quantifying direct and indirect carbon dioxide emissions of the Chinese tourism industry. *J Clean Prod* 126:586–594 . doi: 10.1016/j.jclepro.2016.03.067
- Meng X, Wen Z, Qian Y, Yu H (2017b) Evaluation of cleaner production technology integration for the Chinese herbal medicine industry using carbon flow analysis. *J Clean Prod* 163:49–57 . doi: 10.1016/j.jclepro.2015.10.067
- Menikpura SNM, Santo A, Hotta Y (2014) Assessing the climate co-benefits from Waste Electrical and Electronic Equipment (WEEE) recycling in Japan. *J Clean Prod* 74:183–190 . doi: 10.1016/j.jclepro.2014.03.040
- Miah JH, Griffiths A, McNeill R, et al (2018) Environmental management of confectionery products: Life cycle impacts and improvement strategies. *J Clean Prod* 177:732–751 . doi: 10.1016/j.jclepro.2017.12.073
- Michailidou A V., Vlachokostas C, Moussiopoulos N, Maleka D (2016) Life Cycle Thinking used for assessing the environmental impacts of tourism activity for a Greek tourism destination. *J Clean Prod* 111:499–510 . doi: 10.1016/j.jclepro.2015.09.099
- Michos MC, Menexes GC, Mamolos AP, et al (2018) Energy flow, carbon and water footprints in vineyards and orchards to determine environmentally favourable sites in accordance with Natura 2000 perspective. *J Clean Prod* 187:400–408 . doi: 10.1016/j.jclepro.2018.03.251
- Middlemas S, Fang ZZ, Fan P (2015) Life cycle assessment comparison of emerging and traditional Titanium dioxide manufacturing processes. *J Clean Prod* 89:137–147 . doi: 10.1016/j.jclepro.2014.11.019

- Miller-Robbie L, Ulrich BA, Ramey DF, et al (2015) Life cycle energy and greenhouse gas assessment of the co-production of biosolids and biochar for land application. *J Clean Prod* 91:118–127 . doi: 10.1016/j.jclepro.2014.12.050
- Miller SA, Billington SL, Lepech MD (2016) Influence of carbon feedstock on potentially net beneficial environmental impacts of bio-based composites. *J Clean Prod* 132:266–278 . doi: 10.1016/j.jclepro.2015.11.047
- Miranda De Souza V, Borsato M (2016) Combining Stage-Gate™ model using Set-Based concurrent engineering and sustainable end-of-life principles in a product development assessment tool. *J Clean Prod* 112:3222–3231 . doi: 10.1016/j.jclepro.2015.06.013
- Mitterpach J, Hroncová E, Ladomerský J, Balco K (2017) Environmental evaluation of grey cast iron via life cycle assessment. *J Clean Prod* 148:324–335 . doi: 10.1016/j.jclepro.2017.02.023
- Mladenovič A, Turk J, Kovač J, et al (2015) Environmental evaluation of two scenarios for the selection of materials for asphalt wearing courses. *J Clean Prod* 87:683–691 . doi: 10.1016/j.jclepro.2014.10.013
- Mo L, Zhang F, Panesar DK, Deng M (2017) Development of low-carbon cementitious materials via carbonating Portland cement–fly ash–magnesia blends under various curing scenarios: a comparative study. *J Clean Prod* 163:252–261 . doi: 10.1016/j.jclepro.2016.01.066
- Modahl IS, Brekke A, Valente C (2015) Environmental assessment of chemical products from a Norwegian biorefinery. *J Clean Prod* 94:247–259 . doi: 10.1016/j.jclepro.2015.01.054
- Moecke EHS, Feller R, Santos HA dos, et al (2016) Biodiesel production from waste cooking oil for use as fuel in artisanal fishing boats: Integrating environmental, economic and social aspects. *J Clean Prod* 135:679–688 . doi: 10.1016/j.jclepro.2016.05.167
- Mogensen L, Kristensen T, Nguyen TLT, et al (2014) Method for calculating carbon footprint of cattle feeds - Including contribution from soil carbon changes and use of cattle manure. *J Clean Prod* 73:40–51 . doi: 10.1016/j.jclepro.2014.02.023
- Mogensen L, Nguyen TLT, Madsen NT, et al (2016) Environmental impact of beef sourced from different production systems - focus on the slaughtering stage: input and output. *J Clean Prod* 133:284–293 . doi: 10.1016/j.jclepro.2016.05.105
- Mohamad RS, Verrastro V, Cardone G, et al (2014) Optimization of organic and conventional olive agricultural practices from a Life Cycle Assessment and Life Cycle Costing perspectives. *J Clean Prod* 70:78–89 . doi: 10.1016/j.jclepro.2014.02.033
- Mohammad Sabli NS, Zainon Noor Z, Kanniah KA, et al (2017) Developing a methodology for water footprint of palm oil based on a methodological review. *J Clean Prod* 146:173–180 . doi: 10.1016/j.jclepro.2016.06.149
- Mohammadi A, Rafiee S, Jafari A, et al (2015) Joint Life Cycle Assessment and Data Envelopment Analysis for the benchmarking of environmental impacts in rice paddy production. *J Clean Prod* 106:521–532 . doi: 10.1016/j.jclepro.2014.05.008
- Mohammed F, Biswas WK, Yao H, Tadé M (2018) Sustainability assessment of symbiotic processes for the reuse of phosphogypsum. *J Clean Prod* 188:497–507 . doi: 10.1016/j.jclepro.2018.03.309
- Monari C, Righi S, Olsen SI (2016) Greenhouse gas emissions and energy balance of biodiesel production from microalgae cultivated in photobioreactors in Denmark: A life-cycle modeling. *J Clean Prod* 112:4084–4092 . doi: 10.1016/j.jclepro.2015.08.112
- Montazeri M, Eckelman MJ (2018) Life cycle assessment of UV-Curable bio-based wood flooring coatings. *J Clean Prod* 192:932–939 . doi: 10.1016/j.jclepro.2018.04.209
- Morales M, Aroca G, Rubilar R, et al (2015) Cradle-to-gate life cycle assessment of Eucalyptus globulus short rotation plantations in Chile. *J Clean Prod* 99:239–249 . doi: 10.1016/j.jclepro.2015.02.085
- Moreira N, De Santa-Eulalia LA, Ait-Kadi D, et al (2015) A conceptual framework to develop green textiles in the aeronautic completion industry: A case study in a large manufacturing company. *J Clean Prod* 105:371–388 . doi: 10.1016/j.jclepro.2014.09.056
- Moreno-Leiva S, Díaz-Ferrán G, Haas J, et al (2017) Towards solar power supply for copper production in Chile: Assessment of global warming potential using a life-cycle approach. *J Clean Prod* 164:242–249 . doi: 10.1016/j.jclepro.2017.06.038

- Moretti L, Caro S (2017) Critical analysis of the Life Cycle Assessment of the Italian cement industry. *J Clean Prod* 152:198–210 . doi: 10.1016/j.jclepro.2017.03.136
- Moretti L, Mandrone V, D'Andrea A, Caro S (2018) Evaluation of the environmental and human health impact of road construction activities. *J Clean Prod* 172:1004–1013 . doi: 10.1016/j.jclepro.2017.10.250
- Morosuk T, Tsatsaronis G, Koroneos C (2016) Environmental impact reduction using exergy-based methods. *J Clean Prod* 118:118–123 . doi: 10.1016/j.jclepro.2016.01.064
- Motevali A, Tabatabaee Kolor R (2017) A comparison between pollutants and greenhouse gas emissions from operation of different dryers based on energy consumption of power plants. *J Clean Prod* 154:445–461 . doi: 10.1016/j.jclepro.2017.03.219
- Mousavi-Avval SH, Rafiee S, Sharifi M, et al (2017) Application of multi-objective genetic algorithms for optimization of energy, economics and environmental life cycle assessment in oilseed production. *J Clean Prod* 140:804–815 . doi: 10.1016/j.jclepro.2016.03.075
- Moussa HI, Elkamel A, Young SB (2016) Assessing energy performance of bio-based succinic acid production using LCA. *J Clean Prod* 139:761–769 . doi: 10.1016/j.jclepro.2016.08.104
- Mujica M, Blanco G, Santalla E (2016) Carbon footprint of honey produced in Argentina. *J Clean Prod* 116:50–60 . doi: 10.1016/j.jclepro.2015.12.086
- Müller K, Holmes A, Deurer M, Clothier BE (2015) Eco-efficiency as a sustainability measure for kiwifruit production in New Zealand. *J Clean Prod* 106:333–342 . doi: 10.1016/j.jclepro.2014.07.049
- Murphy E, de Boer IJM, van Middelaar CE, et al (2017) Water footprinting of dairy farming in Ireland. *J Clean Prod* 140:547–555 . doi: 10.1016/j.jclepro.2016.07.199
- Musaazi MK, Mechtenberg AR, Nakibuule J, et al (2015) Quantification of social equity in life cycle assessment for increased sustainable production of sanitary products in Uganda. *J Clean Prod* 96:570–579 . doi: 10.1016/j.jclepro.2013.10.026
- Musikavong C, Gheewala SH (2017b) Ecological footprint assessment towards eco-efficient oil palm and rubber plantations in Thailand. *J Clean Prod* 140:581–589 . doi: 10.1016/j.jclepro.2016.07.159
- Musikavong C, Gheewala SH (2017a) Assessing ecological footprints of products from the rubber industry and palm oil mills in Thailand. *J Clean Prod* 142:1148–1157 . doi: 10.1016/j.jclepro.2016.08.117
- Nabavi-Pelesaraei A, Bayat R, Hosseinzadeh-Bandbafha H, et al (2017a) Modeling of energy consumption and environmental life cycle assessment for incineration and landfill systems of municipal solid waste management - A case study in Tehran Metropolis of Iran. *J Clean Prod* 148:427–440 . doi: 10.1016/j.jclepro.2017.01.172
- Nabavi-Pelesaraei A, Rafiee S, Mohtasebi SS, et al (2017b) Energy consumption enhancement and environmental life cycle assessment in paddy production using optimization techniques. *J Clean Prod* 162:571–586 . doi: 10.1016/j.jclepro.2017.06.071
- Nadeem H, Habib NZ, Ng CA, et al (2017) Utilization of catalyzed waste vegetable oil as a binder for the production of environmentally friendly roofing tiles. *J Clean Prod* 145:250–261 . doi: 10.1016/j.jclepro.2017.01.028
- Nakakubo T, Yoshida N, Hattori Y (2017) Analysis of greenhouse gas emission reductions by collaboratively updating equipment in sewage treatment and municipal solid waste incineration plants. *J Clean Prod* 168:803–813 . doi: 10.1016/j.jclepro.2017.09.058
- Nasution MA, Wibawa DS, Ahamed T, Noguchi R (2018) Comparative environmental impact evaluation of palm oil mill effluent treatment using a life cycle assessment approach: A case study based on composting and a combination for biogas technologies in North Sumatera of Indonesia. *J Clean Prod* 184:1028–1040 . doi: 10.1016/j.jclepro.2018.02.299
- Naudin C, Van Der Werf HMG, Jeuffroy MH, Corre-Hellou G (2014) Life cycle assessment applied to pea-wheat intercrops: A new method for handling the impacts of co-products. *J Clean Prod* 73:80–87 . doi: 10.1016/j.jclepro.2013.12.029
- Navarro A, Puig R, Kılıç E, et al (2017) Eco-innovation and benchmarking of carbon footprint data for vineyards and wineries in Spain and France. *J Clean Prod* 142:1661–1671 . doi: 10.1016/j.jclepro.2016.11.124



- Nhu TT, Schaubroeck T, De Meester S, et al (2015) Resource consumption assessment of Pangasius fillet products from Vietnamese aquaculture to European retailers. *J Clean Prod* 100:170–178 . doi: 10.1016/j.jclepro.2015.03.030
- Nikbin IM, Aliaghazadeh M, Sh Charkhtab, Fathollahpour A (2018) Environmental impacts and mechanical properties of lightweight concrete containing bauxite residue (red mud). *J Clean Prod* 172:2683–2694 . doi: 10.1016/j.jclepro.2017.11.143
- Nikkhah A, Emadi B, Soltanali H, et al (2016) Integration of life cycle assessment and Cobb-Douglas modeling for the environmental assessment of kiwifruit in Iran. *J Clean Prod* 137:843–849 . doi: 10.1016/j.jclepro.2016.07.151
- Nikkhah A, Khojastehpour M, Emadi B, et al (2015) Environmental impacts of peanut production system using life cycle assessment methodology. *J Clean Prod* 92:84–90 . doi: 10.1016/j.jclepro.2014.12.048
- Nishikawa E, da Silva MGC, Vieira MGA (2018) Cadmium biosorption by alginate extraction waste and process overview in Life Cycle Assessment context. *J Clean Prod* 178:166–175 . doi: 10.1016/j.jclepro.2018.01.025
- Njenga M, Karanja N, Karlsson H, et al (2014) Additional cooking fuel supply and reduced global warming potential from recycling charcoal dust into charcoal briquette in Kenya. *J Clean Prod* 81:81–88 . doi: 10.1016/j.jclepro.2014.06.002
- Noh S, Son Y, Bong T, Park J (2014) An assessment for leakage reduction methods of reservoir embankments through estimation of CO<sub>2</sub> emissions during the construction process. *J Clean Prod* 79:116–123 . doi: 10.1016/j.jclepro.2014.05.020
- Notarnicola B, Tassielli G, Renzulli PA (2015) Environmental and technical improvement of a grape must concentration system via a life cycle approach. *J Clean Prod* 89:87–98 . doi: 10.1016/j.jclepro.2014.11.020
- Notarnicola B, Tassielli G, Renzulli PA, et al (2017) Environmental impacts of food consumption in Europe. *J Clean Prod* 140:753–765 . doi: 10.1016/j.jclepro.2016.06.080
- Noya I, González-García S, Bacenetti J, et al (2015) Comparative life cycle assessment of three representative feed cereals production in the Po Valley (Italy). *J Clean Prod* 99:250–265 . doi: 10.1016/j.jclepro.2015.03.001
- Nucci B, Puccini M, Pelagagge L, et al (2014) Improving the environmental performance of vegetable oil processing through LCA. *J Clean Prod* 64:310–322 . doi: 10.1016/j.jclepro.2013.07.049
- Nunes FA, Seferin M, Maciel VG, et al (2016) Life cycle greenhouse gas emissions from rice production systems in Brazil: A comparison between minimal tillage and organic farming. *J Clean Prod* 139:799–809 . doi: 10.1016/j.jclepro.2016.08.106
- Nunes FA, Seferin M, Maciel VG, Ayub MAZ (2017) Life Cycle Assessment comparison between brown parboiled rice produced under organic and minimal tillage cultivation systems. *J Clean Prod* 161:95–104 . doi: 10.1016/j.jclepro.2017.05.098
- Obrecht M, Knez M (2017) Carbon and resource savings of different cargo container designs. *J Clean Prod* 155:151–156 . doi: 10.1016/j.jclepro.2016.11.076
- Ogino A, Sommart K, Subepang S, et al (2016) Environmental impacts of extensive and intensive beef production systems in Thailand evaluated by life cycle assessment. *J Clean Prod* 112:22–31 . doi: 10.1016/j.jclepro.2015.08.110
- Oldfield TL, Achmon Y, Perano KM, et al (2017) A life cycle assessment of biosolarization as a valorization pathway for tomato pomace utilization in California. *J Clean Prod* 141:146–156 . doi: 10.1016/j.jclepro.2016.09.051
- Oldfield TL, White E, Holden NM (2018) The implications of stakeholder perspective for LCA of wasted food and green waste. *J Clean Prod* 170:1554–1564 . doi: 10.1016/j.jclepro.2017.09.239
- Oliveira LSBL, Oliveira DSBL, Bezerra BS, et al (2017) Environmental analysis of organic waste treatment focusing on composting scenarios. *J Clean Prod* 155:229–237 . doi: 10.1016/j.jclepro.2016.08.093
- Olmez GM, Dilek FB, Karanfil T, Yetis U (2016) The environmental impacts of iron and steel industry: A life cycle assessment study. *J Clean Prod* 130:195–201 . doi: 10.1016/j.jclepro.2015.09.139

- Oltean-Dumbrava C, Miah A (2016) Assessment and relative sustainability of common types of roadside noise barriers. *J Clean Prod* 135:919–931 . doi: 10.1016/j.jclepro.2016.06.107
- Oltean-Dumbrava C, Watts G, Miah A (2016) Towards a more sustainable surface transport infrastructure: A case study of applying multi criteria analysis techniques to assess the sustainability of transport noise reducing devices. *J Clean Prod* 112:2922–2934 . doi: 10.1016/j.jclepro.2015.09.096
- Ooba M, Hayashi K, Fujii M, et al (2015) A long-term assessment of ecological-economic sustainability of woody biomass production in Japan. *J Clean Prod* 88:318–325 . doi: 10.1016/j.jclepro.2014.09.072
- Ordouei MH, Elsholkami M, Elkamel A, Croiset E (2016) New composite sustainability indices for the assessment of a chemical process in the conceptual design stage: Case study on hydrogenation plant. *J Clean Prod* 124:132–141 . doi: 10.1016/j.jclepro.2016.02.107
- Ortiz-Reyes E, Anex RP (2018) A life cycle impact assessment method for freshwater eutrophication due to the transport of phosphorus from agricultural production. *J Clean Prod* 177:474–482 . doi: 10.1016/j.jclepro.2017.12.255
- Ottelin J, Heinonen J, Junnila S (2018) Carbon footprint trends of metropolitan residents in Finland: How strong mitigation policies affect different urban zones. *J Clean Prod* 170:1523–1535 . doi: 10.1016/j.jclepro.2017.09.204
- Pacelli F, Ostuzzi F, Levi M (2015) Reducing and reusing industrial scraps: A proposed method for industrial designers. *J Clean Prod* 86:78–87 . doi: 10.1016/j.jclepro.2014.08.088
- Pacetti T, Lombardi L, Federici G (2015) Water-energy Nexus: A case of biogas production from energy crops evaluated by Water Footprint and Life Cycle Assessment (LCA) methods. *J Clean Prod* 101:1–14 . doi: 10.1016/j.jclepro.2015.03.084
- Page G, Ridoutt B, Bellotti B (2014) Location and technology options to reduce environmental impacts from agriculture. *J Clean Prod* 81:130–136 . doi: 10.1016/j.jclepro.2014.06.055
- Pal SK, Takano A, Alanne K, et al (2017) A multi-objective life cycle approach for optimal building design: A case study in Finnish context. *J Clean Prod* 143:1021–1035 . doi: 10.1016/j.jclepro.2016.12.018
- Palmieri N, Forleo MB, Giannoccaro G, Suardi A (2017) Environmental impact of cereal straw management: An on-farm assessment. *J Clean Prod* 142:2950–2964 . doi: 10.1016/j.jclepro.2016.10.173
- Paolotti L, Boggia A, Castellini C, et al (2016) Combining livestock and tree crops to improve sustainability in agriculture: A case study using the Life Cycle Assessment (LCA) approach. *J Clean Prod* 131:351–363 . doi: 10.1016/j.jclepro.2016.05.024
- Papacharalampou C, McManus M, Newnes LB, Green D (2017) Catchment metabolism: Integrating natural capital in the asset management portfolio of the water sector. *J Clean Prod* 142:1994–2005 . doi: 10.1016/j.jclepro.2016.11.084
- Papong S, Malakul P, Trungkavashirakun R, et al (2014) Comparative assessment of the environmental profile of PLA and PET drinking water bottles from a life cycle perspective. *J Clean Prod* 65:539–550 . doi: 10.1016/j.jclepro.2013.09.030
- Papong S, Rewlay-ngoan C, Itsubo N, Malakul P (2017) Environmental life cycle assessment and social impacts of bioethanol production in Thailand. *J Clean Prod* 157:254–266 . doi: 10.1016/j.jclepro.2017.04.122
- Parker RWR, Hartmann K, Green BS, et al (2015a) Environmental and economic dimensions of fuel use in Australian Fisheries. *J Clean Prod* 87:78–86 . doi: 10.1016/j.jclepro.2014.09.081
- Parker RWR, Vázquez-Rowe I, Tyedmers PH (2015b) Fuel performance and carbon footprint of the global purse seine tuna fleet. *J Clean Prod* 103:517–524 . doi: 10.1016/j.jclepro.2014.05.017
- Pasquet V, Behary N, Perwuelz A (2014) Environmental impacts of chemical/ecotechnological/biotechnological hydrophilisation of polyester fabrics. *J Clean Prod* 65:551–560 . doi: 10.1016/j.jclepro.2013.06.052
- Patthanaissaranukool W, Polprasert C (2016) Reducing carbon emissions from soybean cultivation to oil production in Thailand. *J Clean Prod* 131:170–178 . doi: 10.1016/j.jclepro.2016.05.053
- Pavlík Z, Fořt J, Záleská M, et al (2016) Energy-efficient thermal treatment of sewage sludge for its application in blended cements. *J Clean Prod* 112:409–419 . doi: 10.1016/j.jclepro.2015.09.072
- Peano C, Baudino C, Tecco N, Girgenti V (2015) Green marketing tools for fruit growers associated groups: Application of the Life Cycle Assessment (LCA) for strawberries and berry fruits ecobranding in northern Italy. *J Clean Prod* 104:59–67 . doi: 10.1016/j.jclepro.2015.04.087

- Pellegrini G, Ingrao C, Camposeo S, et al (2016) Application of water footprint to olive growing systems in the Apulia region: A comparative assessment. *J Clean Prod* 112:2407–2418 . doi: 10.1016/j.jclepro.2015.10.088
- Peng C (2016) Calculation of a building's life cycle carbon emissions based on Ecotect and building information modeling. *J Clean Prod* 112:453–465 . doi: 10.1016/j.jclepro.2015.08.078
- Pénicaud C, Monclus V, Perret B, et al (2018) Life cycle assessment of the production of stabilized lactic acid bacteria for the environmentally-friendly preservation of living cells. *J Clean Prod* 184:847–858 . doi: 10.1016/j.jclepro.2018.02.191
- Pereira RPT, Ribeiro GM, Filimonau V (2017) The carbon footprint appraisal of local visitor travel in Brazil: A case of the Rio de Janeiro-São Paulo itinerary. *J Clean Prod* 141:256–266 . doi: 10.1016/j.jclepro.2016.09.049
- Perera P, Hewage K, Sadiq R (2017) Are we ready for alternative fuel transportation systems in Canada: A regional vignette. *J Clean Prod* 166:717–731 . doi: 10.1016/j.jclepro.2017.08.078
- Pérez-López P, González-García S, Jeffryes C, et al (2014a) Life cycle assessment of the production of the red antioxidant carotenoid astaxanthin by microalgae: From lab to pilot scale. *J Clean Prod* 64:332–344 . doi: 10.1016/j.jclepro.2013.07.011
- Pérez-López P, González-García S, Ulloa RG, et al (2014b) Life cycle assessment of the production of bioactive compounds from *Tetraselmis suecica* at pilot scale. *J Clean Prod* 64:323–331 . doi: 10.1016/j.jclepro.2013.07.028
- Pérez-López P, Ledda FD, Bisio A, et al (2017) Life cycle assessment of in situ mariculture in the Mediterranean Sea for the production of bioactive compounds from the sponge *Sarcotragus spinosulus*. *J Clean Prod* 142:4356–4368 . doi: 10.1016/j.jclepro.2016.11.137
- Pérez J, Lumbreras J, de la Paz D, Rodríguez E (2017) Methodology to evaluate the environmental impact of urban solid waste containerization system: A case study. *J Clean Prod* 150:197–213 . doi: 10.1016/j.jclepro.2017.03.003
- Perez Neira D (2016) Energy sustainability of Ecuadorian cacao export and its contribution to climate change. A case study through product life cycle assessment. *J Clean Prod* 112:2560–2568 . doi: 10.1016/j.jclepro.2015.11.003
- Pergola M, Persiani A, Pastore V, et al (2017) A comprehensive Life Cycle Assessment (LCA) of three apricot orchard systems located in Metapontino area (Southern Italy). *J Clean Prod* 142:4059–4071 . doi: 10.1016/j.jclepro.2016.10.030
- Pergola M, Piccolo A, Palese AM, et al (2018) A combined assessment of the energy, economic and environmental issues associated with on-farm manure composting processes: Two case studies in South of Italy. *J Clean Prod* 172:3969–3981 . doi: 10.1016/j.jclepro.2017.04.111
- Petrescu L, Fermeiglia M, Cormos CC (2016) Life Cycle Analysis applied to acrylic acid production process with different fuels for steam generation. *J Clean Prod* 133:294–303 . doi: 10.1016/j.jclepro.2016.05.088
- Pires A, Martinho G, Ribeiro R, et al (2015) Extended producer responsibility: a differential fee model for promoting sustainable packaging. *J Clean Prod* 108:343–353 . doi: 10.1016/j.jclepro.2015.07.084
- Popoff A, Millet D, Pialot O (2016) A method for identifying and quantifying Usage EcoDrifts. *J Clean Prod* 137:527–536 . doi: 10.1016/j.jclepro.2016.07.122
- Postacchini L, Mazzuto G, Paciarotti C, Ciarapica FE (2018) Reuse of honey jars for healthier bees: Developing a sustainable honey jars supply chain through the use of LCA. *J Clean Prod* 177:573–588 . doi: 10.1016/j.jclepro.2017.12.240
- Pourbafrani M, McKechnie J, Shen T, et al (2014) Impacts of pre-treatment technologies and co-products on greenhouse gas emissions and energy use of lignocellulosic ethanol production. *J Clean Prod* 78:104–111 . doi: 10.1016/j.jclepro.2014.04.050
- Prada M, Martinez-Alonso C, Sanchez-Garcia S, Canga E (2015) Analysis of three forest chippers: productivity, costs and GHG emissions in Northern Spain. *J Clean Prod* 101:238–244 . doi: 10.1016/j.jclepro.2015.03.066

- Pragya N, Sharma N, Gowda B (2017) Biofuel from oil-rich tree seeds: Net energy ratio, emissions saving and other environmental impacts associated with agroforestry practices in Hassan district of Karnataka, India. *J Clean Prod* 164:905–917 . doi: 10.1016/j.jclepro.2017.07.005
- Prapainainar P, Boonrod B, Phetarporn V, et al (2017) Evaluating the environmental impacts of graft copolymer prepared by conventional emulsion polymerization, electron beam irradiation, and gamma ray irradiation through life cycle assessment. *J Clean Prod* 167:1038–1047 . doi: 10.1016/j.jclepro.2016.10.048
- Prasara-A J, Gheewala SH (2016) Sustainability of sugarcane cultivation: case study of selected sites in north-eastern Thailand. *J Clean Prod* 134:613–622 . doi: 10.1016/j.jclepro.2015.09.029
- Prasara-A J, Gheewala SH (2018) Applying Social Life Cycle Assessment in the Thai Sugar Industry: Challenges from the field. *J Clean Prod* 172:335–346 . doi: 10.1016/j.jclepro.2017.10.120
- Pressley PN, Aziz TN, DeCarolis JF, et al (2014) Municipal solid waste conversion to transportation fuels: a life-cycle estimation of global warming potential and energy consumption. *J Clean Prod* 70:145–153 . doi: 10.1016/j.jclepro.2014.02.041
- Priarone PC, Ingarao G (2017) Towards criteria for sustainable process selection: On the modelling of pure subtractive versus additive/subtractive integrated manufacturing approaches. *J Clean Prod* 144:57–68 . doi: 10.1016/j.jclepro.2016.12.165
- Proietti P, Sdringola P, Brunori A, et al (2016) Assessment of carbon balance in intensive and extensive tree cultivation systems for oak, olive, poplar and walnut plantation. *J Clean Prod* 112:2613–2624 . doi: 10.1016/j.jclepro.2015.10.009
- Proietti S, Sdringola P, Regni L, et al (2017) Extra Virgin Olive oil as carbon negative product: Experimental analysis and validation of results. *J Clean Prod* 166:550–562 . doi: 10.1016/j.jclepro.2017.07.230
- Proto AR, Bacenetti J, Macrì G, Zimbalatti G (2017) Roundwood and bioenergy production from forestry: Environmental impact assessment considering different logging systems. *J Clean Prod* 165:1485–1498 . doi: 10.1016/j.jclepro.2017.07.227
- Pryor SW, Smithers J, Lyne P, van Antwerpen R (2017) Impact of agricultural practices on energy use and greenhouse gas emissions for South African sugarcane production. *J Clean Prod* 141:137–145 . doi: 10.1016/j.jclepro.2016.09.069
- Pubule J, Blumberga A, Romagnoli F, Blumberga D (2015) Finding an optimal solution for biowaste management in the Baltic States. *J Clean Prod* 88:214–223 . doi: 10.1016/j.jclepro.2014.04.053
- Pujadas-Gispert E, Sanjuan-Delmás D, Josa A (2018) Environmental analysis of building shallow foundations: The influence of prefabrication, typology, and structural design codes. *J Clean Prod* 186:407–417 . doi: 10.1016/j.jclepro.2018.03.105
- Qi JY, Yang ST, Xue JF, et al (2018) Response of carbon footprint of spring maize production to cultivation patterns in the Loess Plateau, China. *J Clean Prod* 187:525–536 . doi: 10.1016/j.jclepro.2018.02.184
- Qiang T, Yu D, Zhang A, et al (2014) Life cycle assessment on polylactide-based wood plastic composites toughened with polyhydroxyalkanoates. *J Clean Prod* 66:139–145 . doi: 10.1016/j.jclepro.2013.11.074
- Qin X, Mo Y, Jing L (2016) Risk perceptions of the life-cycle of green buildings in China. *J Clean Prod* 126:148–158 . doi: 10.1016/j.jclepro.2016.03.103
- Quintana A, Alba J, del Rey R, Guillen-Guillamon I (2018) Comparative Life Cycle Assessment of gypsum plasterboard and a new kind of bio-based epoxy composite containing different natural fiber. *J Clean Prod* 185:408–420 . doi: 10.1016/j.jclepro.2018.03.042
- Quinteiro P, Dias AC, Pina L, et al (2014) Addressing the freshwater use of a Portuguese wine ('vinho verde') using different LCA methods. *J Clean Prod* 68:46–55 . doi: 10.1016/j.jclepro.2014.01.017
- Quirós R, Villalba G, Muñoz P, et al (2014) Environmental and agronomical assessment of three fertilization treatments applied in horticultural open field crops. *J Clean Prod* 67:147–158 . doi: 10.1016/j.jclepro.2013.12.039
- Rahim R, Abdul Raman AA (2017) Carbon dioxide emission reduction through cleaner production strategies in a recycled plastic resins producing plant. *J Clean Prod* 141:1067–1073 . doi: 10.1016/j.jclepro.2016.09.023
- Rajaeifar MA, Ghobadian B, Safa M, Heidari MD (2014) Energy life-cycle assessment and CO<sub>2</sub> emissions analysis of soybean-based biodiesel: A case study. *J Clean Prod* 66:233–241 . doi: 10.1016/j.jclepro.2013.10.041

- Rakotoson V, Praene JP (2017) A life cycle assessment approach to the electricity generation of French overseas territories. *J Clean Prod* 168:755–763 . doi: 10.1016/j.jclepro.2017.09.055
- Räsänen K, Mattila T, Porvari P, et al (2015) Estimating the development of ecotoxicological pressure on water systems from pesticides in Finland 2000–2011. *J Clean Prod* 89:65–77 . doi: 10.1016/j.jclepro.2014.11.008
- Raugei M, El Fakir O, Wang L, et al (2014) Life cycle assessment of the potential environmental benefits of a novel hot forming process in automotive manufacturing. *J Clean Prod* 83:80–86 . doi: 10.1016/j.jclepro.2014.07.037
- Ren C, Wang W, Mao Y, et al (2017) Comparative life cycle assessment of sulfoaluminate clinker production derived from industrial solid wastes and conventional raw materials. *J Clean Prod* 167:1314–1324 . doi: 10.1016/j.jclepro.2017.05.184
- Resta B, Gaiardelli P, Pinto R, Dotti S (2016) Enhancing environmental management in the textile sector: An Organisational-Life Cycle Assessment approach. *J Clean Prod* 135:620–632 . doi: 10.1016/j.jclepro.2016.06.135
- Restrepo A, Becerra R, Tibaquirá JEG (2016) Energetic and carbon footprint analysis in manufacturing process of bamboo boards in Colombia. *J Clean Prod* 126:563–571 . doi: 10.1016/j.jclepro.2016.02.144
- Reutter B, Lant P, Lane J, et al (2017) Food waste consequences: Environmentally extended input-output as a framework for analysis. *J Clean Prod* 153:506–514 . doi: 10.1016/j.jclepro.2016.09.104
- Ribeiro I, Sobral P, Peças P, Henriques E (2018) A sustainable business model to fight food waste. *J Clean Prod* 177:262–275 . doi: 10.1016/j.jclepro.2017.12.200
- Ridouat BG, Page G, Opie K, et al (2014) Carbon, water and land use footprints of beef cattle production systems in southern Australia. *J Clean Prod* 73:24–30 . doi: 10.1016/j.jclepro.2013.08.012
- Righi S, Baioli F, Samorì C, et al (2017) A life cycle assessment of poly-hydroxybutyrate extraction from microbial biomass using dimethyl carbonate. *J Clean Prod* 168:692–707 . doi: 10.1016/j.jclepro.2017.08.227
- Righi S, Bandini V, Fabbri D, et al (2016) Modelling of an alternative process technology for biofuel production and assessment of its environmental impacts. *J Clean Prod* 122:42–51 . doi: 10.1016/j.jclepro.2016.02.047
- Rivera-Méndez YD, Rodríguez DT, Romero HM (2017) Carbon footprint of the production of oil palm (*Elaeis guineensis*) fresh fruit bunches in Colombia. *J Clean Prod* 149:743–750 . doi: 10.1016/j.jclepro.2017.02.149
- Rivera XCS, Azapagic A (2016) Life cycle costs and environmental impacts of production and consumption of ready and home-made meals. *J Clean Prod* 112:214–228 . doi: 10.1016/j.jclepro.2015.07.111
- Robertson S (2016) A longitudinal quantitative–qualitative systems approach to the study of transitions toward a low carbon society. *J Clean Prod* 128:221–233 . doi: 10.1016/j.jclepro.2015.04.074
- Rocchetti L, Amato A, Beolchini F (2016) Recovery of indium from liquid crystal displays. *J Clean Prod* 116:299–305 . doi: 10.1016/j.jclepro.2015.12.080
- Rocchetti L, Beolchini F (2015) Recovery of valuable materials from end-of-life thin-film photovoltaic panels: Environmental impact assessment of different management options. *J Clean Prod* 89:59–64 . doi: 10.1016/j.jclepro.2014.11.009
- Rocco M V., Cassetti G, Gardumi F, Colombo E (2016) Exergy Life Cycle Assessment of soil erosion remediation technologies: An Italian case study. *J Clean Prod* 112:3007–3017 . doi: 10.1016/j.jclepro.2015.10.055
- Rodrigues J, Houzelot V, Ferrari F, et al (2016) Life cycle assessment of agromining chain highlights role of erosion control and bioenergy. *J Clean Prod* 139:770–778 . doi: 10.1016/j.jclepro.2016.08.110
- Rodríguez-Alloza AM, Malik A, Lenzen M, Gallego J (2015) Hybrid input-output life cycle assessment of warm mix asphalt mixtures. *J Clean Prod* 90:171–182 . doi: 10.1016/j.jclepro.2014.11.035
- Rodríguez-Ortega T, Bernués A, Olaiola AM, Brown MT (2017) Does intensification result in higher efficiency and sustainability? An emergy analysis of Mediterranean sheep-crop farming systems. *J Clean Prod* 144:171–179 . doi: 10.1016/j.jclepro.2016.12.089

- Rodríguez R, Espada JJ, Gallardo M, et al (2018) Life cycle assessment and techno-economic evaluation of alternatives for the treatment of wastewater in a chrome-plating industry. *J Clean Prod* 172:2351–2362 . doi: 10.1016/j.jclepro.2017.11.175
- Rodríguez R, Espada JJ, Pariente MI, et al (2016) Comparative life cycle assessment (LCA) study of heterogeneous and homogenous Fenton processes for the treatment of pharmaceutical wastewater. *J Clean Prod* 124:21–29 . doi: 10.1016/j.jclepro.2016.02.064
- Roibás L, Elbehri A, Hospido A (2016) Carbon footprint along the Ecuadorian banana supply chain: Methodological improvements and calculation tool. *J Clean Prod* 112:2441–2451 . doi: 10.1016/j.jclepro.2015.09.074
- Romero-Gámez M, Audsley E, Suárez-Rey EM (2014) Life cycle assessment of cultivating lettuce and escarole in Spain. *J Clean Prod* 73:193–203 . doi: 10.1016/j.jclepro.2013.10.053
- Romero-Gámez M, Castro-Rodríguez J, Suárez-Rey EM (2017) Optimization of olive growing practices in Spain from a life cycle assessment perspective. *J Clean Prod* 149:25–37 . doi: 10.1016/j.jclepro.2017.02.071
- Roos S, Zamani B, Sandin G, et al (2016) A life cycle assessment (LCA)-based approach to guiding an industry sector towards sustainability: the case of the Swedish apparel sector. *J Clean Prod* 133:691–700 . doi: 10.1016/j.jclepro.2016.05.146
- Ruan S, Unluer C (2016) Comparative life cycle assessment of reactive MgO and Portland cement production. *J Clean Prod* 137:258–273 . doi: 10.1016/j.jclepro.2016.07.071
- Russell-Smith S V., Lepech MD (2015) Cradle-to-gate sustainable target value design: Integrating life cycle assessment and construction management for buildings. *J Clean Prod* 100:107–115 . doi: 10.1016/j.jclepro.2015.03.044
- Russell-Smith S V., Lepech MD, Fruchter R, Meyer YB (2015) Sustainable target value design: Integrating life cycle assessment and target value design to improve building energy and environmental performance. *J Clean Prod* 88:43–51 . doi: 10.1016/j.jclepro.2014.03.025
- Russo D, Rizzi C, Montelisciani G (2014) Inventive guidelines for a TRIZ-based eco-design matrix. *J Clean Prod* 76:95–105 . doi: 10.1016/j.jclepro.2014.04.057
- Russo G, Vivaldi GA, De Gennaro B, Camposeo S (2015) Environmental sustainability of different soil management techniques in a high-density olive orchard. *J Clean Prod* 107:498–508 . doi: 10.1016/j.jclepro.2014.06.064
- Rybczewska-Błazejowska M, Masternak-Janus A (2018) Eco-efficiency assessment of Polish regions: Joint application of life cycle assessment and data envelopment analysis. *J Clean Prod* 172:1180–1192 . doi: 10.1016/j.jclepro.2017.10.204
- Sagastume Gutiérrez A, Cabello Eras JJ, Gaviria CA, et al (2017) Improved selection of the functional unit in environmental impact assessment of cement. *J Clean Prod* 168:463–473 . doi: 10.1016/j.jclepro.2017.09.007
- Saibuatrong W, Cheroennet N, Suwanmanee U (2017) Life cycle assessment focusing on the waste management of conventional and bio-based garbage bags. *J Clean Prod* 158:319–334 . doi: 10.1016/j.jclepro.2017.05.006
- Salazar C, Lelah A, Brissaud D (2015) Eco-designing Product Service Systems by degrading functions while maintaining user satisfaction. *J Clean Prod* 87:452–462 . doi: 10.1016/j.jclepro.2014.10.031
- Saleh Y (2016) Comparative life cycle assessment of beverages packages in Palestine. *J Clean Prod* 131:28–42 . doi: 10.1016/j.jclepro.2016.05.080
- Salonitis K, Jolly MR, Zeng B, Mehrabi H (2016) Improvements in energy consumption and environmental impact by novel single shot melting process for casting. *J Clean Prod* 137:1532–1542 . doi: 10.1016/j.jclepro.2016.06.165
- Salou T, Le Mouël C, van der Werf HMG (2017) Environmental impacts of dairy system intensification: the functional unit matters! *J Clean Prod* 140:445–454 . doi: 10.1016/j.jclepro.2016.05.019
- Salvador S, Corazzin M, Piasentier E, Bovolenta S (2016) Environmental assessment of small-scale dairy farms with multifunctionality in mountain areas. *J Clean Prod* 124:94–102 . doi: 10.1016/j.jclepro.2016.03.001

- Sánchez-García S, Athanassiadis D, Martínez-Alonso C, et al (2017) A GIS methodology for optimal location of a wood-fired power plant: Quantification of available woodfuel, supply chain costs and GHG emissions. *J Clean Prod* 157:201–212 . doi: 10.1016/j.jclepro.2017.04.058
- Sánchez Berriel S, Favier A, Rosa Domínguez E, et al (2016) Assessing the environmental and economic potential of Limestone Calcined Clay Cement in Cuba. *J Clean Prod* 124:361–369 . doi: 10.1016/j.jclepro.2016.02.125
- Sandanayake M, Zhang G, Setunge S, et al (2017) Estimation and comparison of environmental emissions and impacts at foundation and structure construction stages of a building – A case study. *J Clean Prod* 151:319–329 . doi: 10.1016/j.jclepro.2017.03.041
- Sanjuan-Delmás D, Llorach-Massana P, Nadal A, et al (2018) Environmental assessment of an integrated rooftop greenhouse for food production in cities. *J Clean Prod* 177:326–337 . doi: 10.1016/j.jclepro.2017.12.147
- Sanjuan-Delmás D, Petit-Boix A, Gasol CM, et al (2014) Environmental assessment of different pipelines for drinking water transport and distribution network in small to medium cities: A case from Betanzos, Spain. *J Clean Prod* 66:588–598 . doi: 10.1016/j.jclepro.2013.10.055
- Santos J, Ferreira A, Flintsch G (2017) A multi-objective optimization-based pavement management decision-support system for enhancing pavement sustainability. *J Clean Prod* 164:1380–1393 . doi: 10.1016/j.jclepro.2017.07.027
- Scarpore FV, Hernandez TAD, Ruiz-Corrêa ST, et al (2016b) Sugarcane land use and water resources assessment in the expansion area in Brazil. *J Clean Prod* 133:1318–1327 . doi: 10.1016/j.jclepro.2016.06.074
- Scarpore FV, Hernandez TAD, Ruiz-Corrêa ST, et al (2016a) Sugarcane water footprint under different management practices in Brazil: Tietê/Jacaré watershed assessment. *J Clean Prod* 112:4576–4584 . doi: 10.1016/j.jclepro.2015.05.107
- Schader C, Jud K, Meier MS, et al (2014) Quantification of the effectiveness of greenhouse gas mitigation measures in Swiss organic milk production using a life cycle assessment approach. *J Clean Prod* 73:227–235 . doi: 10.1016/j.jclepro.2013.11.077
- Scheepens AE, Vogtländer JG, Brezet JC (2016) Two life cycle assessment (LCA) based methods to analyse and design complex (regional) circular economy systems. Case: Making water tourism more sustainable. *J Clean Prod* 114:257–268 . doi: 10.1016/j.jclepro.2015.05.075
- Schmidt Rivera XC, Espinoza Orias N, Azapagic A (2014) Life cycle environmental impacts of convenience food: Comparison of ready and home-made meals. *J Clean Prod* 73:294–309 . doi: 10.1016/j.jclepro.2014.01.008
- Sefeedpari P, Shokoohi Z, Behzadifar Y (2014) Energy use and carbon dioxide emission analysis in sugarcane farms: A survey on Haft-Tappeh Sugarcane Agro-Industrial Company in Iran. *J Clean Prod* 83:212–219 . doi: 10.1016/j.jclepro.2014.07.048
- Seghetta M, Hou X, Bastianoni S, et al (2016) Life cycle assessment of macroalgal biorefinery for the production of ethanol, proteins and fertilizers – A step towards a regenerative bioeconomy. *J Clean Prod* 137:1158–1169 . doi: 10.1016/j.jclepro.2016.07.195
- Sen S, Roesler J (2016) Aging albedo model for asphalt pavement surfaces. *J Clean Prod* 117:169–175 . doi: 10.1016/j.jclepro.2016.01.019
- Şengül H, Bayrak F, Aydinalp Köksal M, Ünver B (2016) A cradle to gate life cycle assessment of Turkish lignite used for electricity generation with site-specific data. *J Clean Prod* 129:478–490 . doi: 10.1016/j.jclepro.2016.04.025
- Sengupta D, Abraham JP, Ceja M, et al (2015) Industrial process system assessment: Bridging process engineering and life cycle assessment through multiscale modeling. *J Clean Prod* 90:142–152 . doi: 10.1016/j.jclepro.2014.11.073
- Seto KE, Churchill CJ, Panesar DK (2017) Influence of fly ash allocation approaches on the life cycle assessment of cement-based materials. *J Clean Prod* 157:65–75 . doi: 10.1016/j.jclepro.2017.04.093
- Shahzad K, Čuček L, Sagir M, et al (2018) An ecological feasibility study for developing sustainable street lighting system. *J Clean Prod* 175:683–695 . doi: 10.1016/j.jclepro.2017.12.057
- Shen W, Cao L, Li Q, et al (2016) Is magnesia cement low carbon? Life cycle carbon footprint comparing with Portland cement. *J Clean Prod* 131:20–27 . doi: 10.1016/j.jclepro.2016.05.082

- Shi J, Li T, Peng S, et al (2015) Comparative Life Cycle Assessment of remanufactured liquefied natural gas and diesel engines in China Junli. *J Clean Prod* 101:129–136 . doi: 10.1016/j.jclepro.2015.03.080
- Shi J, Puig R, Sang J, Lin W (2016a) A comprehensive evaluation of physical and environmental performances for wet-white leather manufacture. *J Clean Prod* 139:1512–1519 . doi: 10.1016/j.jclepro.2016.08.120
- Shi X, Mukhopadhyay A, Zollinger D (2018) Sustainability assessment for portland cement concrete pavement containing reclaimed asphalt pavement aggregates. *J Clean Prod* 192:569–581 . doi: 10.1016/j.jclepro.2018.05.004
- Shi X, Wang X, Yang J, Sun Z (2016b) Electric vehicle transformation in Beijing and the comparative eco-environmental impacts: A case study of electric and gasoline powered taxis. *J Clean Prod* 137:449–460 . doi: 10.1016/j.jclepro.2016.07.096
- Shimako AH, Tiruta-Barna L, Pigné Y, et al (2016) Environmental assessment of bioenergy production from microalgae based systems. *J Clean Prod* 139:51–60 . doi: 10.1016/j.jclepro.2016.08.003
- Shin HD, Al-Habaibeh A, Casamayor JL (2017) Using human-powered products for sustainability and health: Benefits, challenges, and opportunities. *J Clean Prod* 168:575–583 . doi: 10.1016/j.jclepro.2017.09.081
- Shinde AM, Dikshit AK, Singh RK, Campana PE (2018) Life cycle analysis based comprehensive environmental performance evaluation of Mumbai Suburban Railway, India. *J Clean Prod* 188:989–1003 . doi: 10.1016/j.jclepro.2018.04.022
- Siddiqui O, Dincer I (2017) Comparative assessment of the environmental impacts of nuclear, wind and hydro-electric power plants in Ontario: A life cycle assessment. *J Clean Prod* 164:848–860 . doi: 10.1016/j.jclepro.2017.06.237
- Siebert A, Bezama A, O’Keeffe S, Thrän D (2018) Social life cycle assessment indices and indicators to monitor the social implications of wood-based products. *J Clean Prod* 172:4074–4084 . doi: 10.1016/j.jclepro.2017.02.146
- Sierra-Pérez J, Boschmonart-Rives J, Dias AC, Gabarrell X (2016) Environmental implications of the use of agglomerated cork as thermal insulation in buildings. *J Clean Prod* 126:97–107 . doi: 10.1016/j.jclepro.2016.02.146
- Silalertruksa T, Gheewala SH (2018) Land-water-energy nexus of sugarcane production in Thailand. *J Clean Prod* 182:521–528 . doi: 10.1016/j.jclepro.2018.02.085
- Silalertruksa T, Gheewala SH, Pongpat P, et al (2017) Environmental sustainability of oil palm cultivation in different regions of Thailand: Greenhouse gases and water use impact. *J Clean Prod* 167:1009–1019 . doi: 10.1016/j.jclepro.2016.11.069
- Silva A, Stocker L, Mercieca P, Rosano M (2016) The role of policy labels, keywords and framing in transitioning waste policy. *J Clean Prod* 115:224–237
- Silva DAL, Lahr FAR, Varanda LD, et al (2015a) Environmental performance assessment of the melamine-urea-formaldehyde (MUF) resin manufacture: A case study in Brazil. *J Clean Prod* 96:299–307 . doi: 10.1016/j.jclepro.2014.03.007
- Silva DAL, Raymundo Pavan AL, Augusto De Oliveira J, Ometto AR (2015b) Life cycle assessment of offset paper production in Brazil: Hotspots and cleaner production alternatives. *J Clean Prod* 93:222–233 . doi: 10.1016/j.jclepro.2015.01.030
- Simões CL, Figueirêdo De Sá R, Ribeiro CJ, et al (2016) Environmental and economic performance of a car component: Assessing new materials, processes and designs. *J Clean Prod* 118:105–117 . doi: 10.1016/j.jclepro.2015.12.101
- Simon B, Amor M Ben, Földényi R (2016) Life cycle impact assessment of beverage packaging systems: Focus on the collection of post-consumer bottles. *J Clean Prod* 112:238–248 . doi: 10.1016/j.jclepro.2015.06.008
- Slotte M, Zevenhoven R (2017) Energy requirements and life cycle assessment of production and product integration of silver, copper and zinc nanoparticles. *J Clean Prod* 148:948–957 . doi: 10.1016/j.jclepro.2017.01.083
- Smetana S, Palanisamy M, Mathys A, Heinz V (2016) Sustainability of insect use for feed and food: Life Cycle Assessment perspective. *J Clean Prod* 137:741–751 . doi: 10.1016/j.jclepro.2016.07.148



- Smith S, Hsu LY, Smith GC (2016) Partial disassembly sequence planning based on cost-benefit analysis. *J Clean Prod* 139:729–739 . doi: 10.1016/j.jclepro.2016.08.095
- Soo VK, Peeters J, Paraskevas D, et al (2018) Sustainable aluminium recycling of end-of-life products: A joining techniques perspective. *J Clean Prod* 178:119–132 . doi: 10.1016/j.jclepro.2017.12.235
- Soode E, Lampert P, Weber-Blaschke G, Richter K (2015) Carbon footprints of the horticultural products strawberries, asparagus, roses and orchids in Germany. *J Clean Prod* 87:168–179 . doi: 10.1016/j.jclepro.2014.09.035
- Souza RG, Rosenhead J, Salhofer SP, et al (2015) Definition of sustainability impact categories based on stakeholder perspectives. *J Clean Prod* 105:41–51 . doi: 10.1016/j.jclepro.2014.09.051
- Sproedt A, Plehn J, Schönsleben P, Herrmann C (2015) A simulation-based decision support for eco-efficiency improvements in production systems. *J Clean Prod* 105:389–405 . doi: 10.1016/j.jclepro.2014.12.082
- Stafford FN, Dias AC, Arroja L, et al (2016a) Life cycle assessment of the production of Portland cement: A Southern Europe case study. *J Clean Prod* 126:159–165 . doi: 10.1016/j.jclepro.2016.02.110
- Stafford FN, Raupp-Pereira F, Labrincha JA, Hotza D (2016b) Life cycle assessment of the production of cement: A Brazilian case study. *J Clean Prod* 137:1293–1299 . doi: 10.1016/j.jclepro.2016.07.050
- Stanchev P, Ribarova I (2016) Complexity, assumptions and solutions for eco-efficiency assessment of urban water systems. *J Clean Prod* 138:229–236 . doi: 10.1016/j.jclepro.2016.03.113
- Starr K, Talens Peiro L, Lombardi L, et al (2014) Optimization of environmental benefits of carbon mineralization technologies for biogas upgrading. *J Clean Prod* 76:32–41 . doi: 10.1016/j.jclepro.2014.04.039
- Stasiulaitiene I, Martuzevicius D, Abromaitis V, et al (2016) Comparative life cycle assessment of plasma-based and traditional exhaust gas treatment technologies. *J Clean Prod* 112:1804–1812 . doi: 10.1016/j.jclepro.2015.01.062
- Steenis ND, van Herpen E, van der Lans IA, et al (2017) Consumer response to packaging design: The role of packaging materials and graphics in sustainability perceptions and product evaluations. *J Clean Prod* 162:286–298 . doi: 10.1016/j.jclepro.2017.06.036
- Strazza C, Del Borghi A, Magrassi F, Gallo M (2016) Using environmental product declaration as source of data for life cycle assessment: A case study. *J Clean Prod* 112:333–342 . doi: 10.1016/j.jclepro.2015.07.058
- Sturtewagen L, De Soete W, Dewulf J, et al (2016) Resource use profile and nutritional value assessment of a typical Belgian meal, catered or home cooked, with pork or Quorn™ as protein source. *J Clean Prod* 112:196–204 . doi: 10.1016/j.jclepro.2015.09.006
- Su S, Li X, Wang T, Zhu Y (2016) A comparative study of environmental performance between CFST and RC columns under combinations of compression and bending. *J Clean Prod* 137:10–20 . doi: 10.1016/j.jclepro.2016.07.043
- Sun XZ, Minowa T, Yamaguchi K, Genchi Y (2015) Evaluation of energy consumption and greenhouse gas emissions from poly(phenylactic acid) production using sweet sorghum. *J Clean Prod* 87:208–215 . doi: 10.1016/j.jclepro.2014.09.041
- Taghdisian H, Pishvaie MR, Farhadi F (2015) Multi-objective optimization approach for green design of methanol plant based on CO<sub>2</sub>-efficiency indicator. *J Clean Prod* 103:640–650 . doi: 10.1016/j.jclepro.2014.05.032
- Tagliaferri C, Evangelisti S, Clift R, et al (2016) Life cycle assessment of conventional and advanced two-stage energy-from-waste technologies for methane production. *J Clean Prod* 129:144–158 . doi: 10.1016/j.jclepro.2016.04.092
- Tam VWY, Senaratne S, Le KN, et al (2017) Life-cycle cost analysis of green-building implementation using timber applications. *J Clean Prod* 147:458–469 . doi: 10.1016/j.jclepro.2017.01.128
- Tan L, Mandley SJ, Peijnenburg W, et al (2018) Combining ex-ante LCA and EHS screening to assist green design: A case study of cellulose nanocrystal foam. *J Clean Prod* 178:494–506 . doi: 10.1016/j.jclepro.2017.12.243
- Tan MQB, Tan RBH, Khoo HH (2014) Prospects of carbon labelling - A life cycle point of view. *J Clean Prod* 72:76–88 . doi: 10.1016/j.jclepro.2012.09.035

- Tang Y, Mak K, Zhao YF (2016) A framework to reduce product environmental impact through design optimization for additive manufacturing. *J Clean Prod* 137:1560–1572 . doi: 10.1016/j.jclepro.2016.06.037
- Tao J, Chen Z, Yu S, Liu Z (2017) Integration of Life Cycle Assessment with computer-aided product development by a feature-based approach. *J Clean Prod* 143:1144–1164 . doi: 10.1016/j.jclepro.2016.12.005
- Tártaro AS, Mata TM, Martins AA, Esteves da Silva JCG (2017) Carbon footprint of the insulation cork board. *J Clean Prod* 143:925–932 . doi: 10.1016/j.jclepro.2016.12.028
- Teixeira ER, Mateus R, Camõesa AF, et al (2016) Comparative environmental life-cycle analysis of concretes using biomass and coal fly ashes as partial cement replacement material. *J Clean Prod* 112:2221–2230 . doi: 10.1016/j.jclepro.2015.09.124
- ten Hoeve M, Nyord T, Peters GM, et al (2016) A life cycle perspective of slurry acidification strategies under different nitrogen regulations. *J Clean Prod* 127:591–599 . doi: 10.1016/j.jclepro.2016.04.014
- Terinte N, Manda BMK, Taylor J, et al (2014) Environmental assessment of coloured fabrics and opportunities for value creation: Spin-dyeing versus conventional dyeing of modal fabrics. *J Clean Prod* 72:127–138 . doi: 10.1016/j.jclepro.2014.02.002
- Thammaraksa C, Wattanawan A, Prapasongsa T (2017) Corporate environmental assessment of a large jewelry company: From a life cycle assessment to green industry. *J Clean Prod* 164:485–494 . doi: 10.1016/j.jclepro.2017.06.220
- Thanawong K, Perret SR, Basset-Mens C (2014) Eco-efficiency of paddy rice production in Northeastern Thailand: A comparison of rain-fed and irrigated cropping systems. *J Clean Prod* 73:204–217 . doi: 10.1016/j.jclepro.2013.12.067
- Theodosiou G, Stylos N, Koroneos C (2015) Integration of the environmental management aspect in the optimization of the design and planning of energy systems. *J Clean Prod* 106:576–593 . doi: 10.1016/j.jclepro.2014.05.096
- Theregowda RB, Vidic R, Landis AE, et al (2016) Integrating external costs with life cycle costs of emissions from tertiary treatment of municipal wastewater for reuse in cooling systems. *J Clean Prod* 112:4733–4740 . doi: 10.1016/j.jclepro.2015.06.020
- Theurl MC, Hörtenhuber SJ, Lindenthal T, Palme W (2017) Unheated soil-grown winter vegetables in Austria: Greenhouse gas emissions and socio-economic factors of diffusion potential. *J Clean Prod* 151:134–144 . doi: 10.1016/j.jclepro.2017.03.016
- Tricase C, Lamonaca E, Ingrao C, et al (2018) A comparative Life Cycle Assessment between organic and conventional barley cultivation for sustainable agriculture pathways. *J Clean Prod* 172:3747–3759 . doi: 10.1016/j.jclepro.2017.07.008
- Tricase C, Rana R, Andriano AM, Ingrao C (2017) An input flow analysis for improved environmental sustainability and management of cherry orchards: A case study in the Apulia region. *J Clean Prod* 156:766–774 . doi: 10.1016/j.jclepro.2017.04.088
- Trudewind CA, Schreiber A, Haumann D (2014b) Photocatalytic methanol and methane production using captured CO<sub>2</sub> from coal power plants. Part II - Well-to-Wheel analysis on fuels for passenger transportation services. *J Clean Prod* 70:38–49 . doi: 10.1016/j.jclepro.2014.02.024
- Tsalidis GA, Joshi Y, Korevaar G, De Jong W (2014) Life cycle assessment of direct co-firing of torrefied and/or pelletised woody biomass with coal in the Netherlands. *J Clean Prod* 81:168–177 . doi: 10.1016/j.jclepro.2014.06.049
- Tsalis T, Avramidou A, Nikolaou IE (2017) A social LCA framework to assess the corporate social profile of companies: Insights from a case study. *J Clean Prod* 164:1665–1676 . doi: 10.1016/j.jclepro.2017.07.003
- Tsarouhas P, Achillas C, Aidonis D, et al (2015) Life Cycle Assessment of olive oil production in Greece. *J Clean Prod* 93:75–83 . doi: 10.1039/c7nj04025c
- Tsutsumi M, Ono Y, Ogasawara H, Hojito M (2018) Life-cycle impact assessment of organic and non-organic grass-fed beef production in Japan. *J Clean Prod* 172:2513–2520 . doi: 10.1016/j.jclepro.2017.11.159
- Turk J, Mladenović A, Knez F, et al (2014) Tar-containing reclaimed asphalt - Environmental and cost assessments for two treatment scenarios. *J Clean Prod* 81:201–210 . doi: 10.1016/j.jclepro.2014.06.031

- Uche J, Martínez-Gracia A, Círez F, Carmona U (2015) Environmental impact of water supply and water use in a Mediterranean water stressed region. *J Clean Prod* 88:196–204 . doi: 10.1016/j.jclepro.2014.04.076
- Uddin MS, Kumar S (2014) Energy, emissions and environmental impact analysis of wind turbine using life cycle assessment technique. *J Clean Prod* 69:153–164 . doi: 10.1016/j.jclepro.2014.01.073
- Ukaew S, Beck E, Meki MN, Shonnard DR (2014) Application of the roundtable on sustainable biofuels method to regional differences in nitrous oxide emissions for the rapeseed hydrotreated renewable jet life cycle. *J Clean Prod* 83:220–227 . doi: 10.1016/j.jclepro.2014.06.004
- Unger S, Landis A (2016) Assessing the environmental, human health, and economic impacts of reprocessed medical devices in a Phoenix hospital's supply chain. *J Clean Prod* 112:1995–2003 . doi: 10.1016/j.jclepro.2015.07.144
- Unger SR, Champion N, Bilec MM, Landis AE (2016) Evaluating quantifiable metrics for hospital green checklists. *J Clean Prod* 127:134–142 . doi: 10.1016/j.jclepro.2016.03.167
- Utomo B, Prawoto AA, Bonnet S, et al (2016) Environmental performance of cocoa production from monoculture and agroforestry systems in Indonesia. *J Clean Prod* 134:583–591 . doi: 10.1016/j.jclepro.2015.08.102
- Uusitalo A, Uusitalo V, Grönman A, et al (2016) Greenhouse gas reduction potential by producing electricity from biogas engine waste heat using organic Rankine cycle. *J Clean Prod* 127:399–405 . doi: 10.1016/j.jclepro.2016.03.125
- Väisänen S, Mikkilä M, Havukainen J, et al (2016) Using a multi-method approach for decision-making about a sustainable local distributed energy system: A case study from Finland. *J Clean Prod* 137:1330–1338 . doi: 10.1016/j.jclepro.2016.07.173
- Valente C, Soldal E, Johnsen FM, et al (2018) Methodological accounting tool for Climate and Energy Planning in a Norwegian municipality. *J Clean Prod* 183:772–785 . doi: 10.1016/j.jclepro.2018.02.203
- Valipour M, Yekkalari M, Shekarchi M, Panahi S (2014) Environmental assessment of green concrete containing natural zeolite on the global warming index in marine environments. *J Clean Prod* 65:418–423 . doi: 10.1016/j.jclepro.2013.07.055
- Van Caneghem J, De Greef J, Block C, Vandecasteele C (2016) NO<sub>x</sub> reduction in waste incinerators by selective catalytic reduction (SCR) instead of selective non catalytic reduction (SNCR) compared from a life cycle perspective: a case study. *J Clean Prod* 112:4452–4460 . doi: 10.1016/j.jclepro.2015.08.068
- Vargas-Ramirez JM, Wiesenborn DP, Ripplinger DG, Pryor SW (2017) Carbon footprint of industrial-beet sugars stored as raw thick juice for use as a fermentation feedstock. *J Clean Prod* 162:1418–1429 . doi: 10.1016/j.jclepro.2017.06.153
- Vasilaki V, Katsou E, Ponsá S, Colón J (2016) Water and carbon footprint of selected dairy products: A case study in Catalonia. *J Clean Prod* 139:504–516 . doi: 10.1016/j.jclepro.2016.08.032
- Veeramani A, Dias GM, Kirkpatrick SI (2017) Carbon footprint of dietary patterns in Ontario, Canada: A case study based on actual food consumption. *J Clean Prod* 162:1398–1406 . doi: 10.1016/j.jclepro.2017.06.025
- Vignali G (2017) Environmental assessment of domestic boilers: A comparison of condensing and traditional technology using life cycle assessment methodology. *J Clean Prod* 142:2493–2508 . doi: 10.1016/j.jclepro.2016.11.025
- Vijay Anand KG, Eswaran K, Ghosh A (2018) Life cycle impact assessment of a seaweed product obtained from *Gracilaria edulis* – A potent plant biostimulant. *J Clean Prod* 170:1621–1627 . doi: 10.1016/j.jclepro.2017.09.241
- Vila-Cortavitarte M, Lastra-González P, Calzada-Pérez MÁ, Indacoechea-Vega I (2018) Analysis of the influence of using recycled polystyrene as a substitute for bitumen in the behaviour of asphalt concrete mixtures. *J Clean Prod* 170:1279–1287 . doi: 10.1016/j.jclepro.2017.09.232
- Villanueva-Rey P, Quinteiro P, Vázquez-Rowe I, et al (2018) Assessing water footprint in a wine appellation: A case study for Ribeiro in Galicia, Spain. *J Clean Prod* 172:2097–2107 . doi: 10.1016/j.jclepro.2017.11.210
- Villanueva-Rey P, Vázquez-Rowe I, Moreira MT, Feijoo G (2014) Comparative life cycle assessment in the wine sector: Biodynamic vs. conventional viticulture activities in NW Spain. *J Clean Prod* 65:330–341 . doi: 10.1016/j.jclepro.2013.08.026

- Vimal KEK, Vinodh S, Raja A (2015) Modelling, assessment and deployment of strategies for ensuring sustainable shielded metal arc welding process - A case study. *J Clean Prod* 93:364–377 . doi: 10.1016/j.jclepro.2015.01.049
- Vinyes E, Asin L, Alegre S, et al (2017) Life Cycle Assessment of apple and peach production, distribution and consumption in Mediterranean fruit sector. *J Clean Prod* 149:313–320 . doi: 10.1016/j.jclepro.2017.02.102
- Vinyes E, Gasol CM, Asin L, et al (2015) Life Cycle Assessment of multiyear peach production. *J Clean Prod* 104:68–79 . doi: 10.1016/j.jclepro.2015.05.041
- Von Geibler J, Cordaro F, Kennedy K, et al (2016) Integrating resource efficiency in business strategies: A mixed-method approach for environmental life cycle assessment in the single-serve coffee value chain. *J Clean Prod* 115:62–74 . doi: 10.1016/j.jclepro.2015.12.052
- Vukelic D, Boskovic N, Agarski B, et al (2018) Eco-design of a low-cost adsorbent produced from waste cherry kernels. *J Clean Prod* 174:1620–1628 . doi: 10.1016/j.jclepro.2017.11.098
- Wang C, Chen B, Yu Y, et al (2017a) Carbon footprint analysis of lithium ion secondary battery industry: two case studies from China. *J Clean Prod* 163:241–251 . doi: 10.1016/j.jclepro.2016.02.057
- Wang C, Li X, Gong T, Zhang H (2014a) Life cycle assessment of wheat-maize rotation system emphasizing high crop yield and high resource use efficiency in Quzhou County. *J Clean Prod* 68:56–63 . doi: 10.1016/j.jclepro.2014.01.018
- Wang D, Guo F, Wu Y, et al (2018a) Technical, economic and environmental assessment of coagulation/filtration tertiary treatment processes in full-scale wastewater treatment plants. *J Clean Prod* 170:1185–1194 . doi: 10.1016/j.jclepro.2017.09.231
- Wang H, Wang L, Shahbazi A (2015) Life cycle assessment of fast pyrolysis of municipal solid waste in North Carolina of USA. *J Clean Prod* 87:511–519 . doi: 10.1016/j.jclepro.2014.09.011
- Wang J, Wu H, Duan H, et al (2018b) Combining life cycle assessment and Building Information Modelling to account for carbon emission of building demolition waste: A case study. *J Clean Prod* 172:3154–3166 . doi: 10.1016/j.jclepro.2017.11.087
- Wang J, Yuan J, Xiao F, et al (2018c) Performance investigation and sustainability evaluation of multiple-polymer asphalt mixtures in airfield pavement. *J Clean Prod* 189:67–77 . doi: 10.1016/j.jclepro.2018.03.208
- Wang S, Xu Z, Zhang W, et al (2017b) Effects of aggregate reuse for overpass reconstruction-extension projects on energy conservation and greenhouse gas reduction: A case study from Shanghai City. *J Clean Prod* 140:1444–1453 . doi: 10.1016/j.jclepro.2016.10.007
- Wang TH, Hsu CL, Huang CH, et al (2016a) Environmental impact of CO<sub>2</sub>-expanded fluid extraction technique in microalgae oil acquisition. *J Clean Prod* 137:813–820 . doi: 10.1016/j.jclepro.2016.07.179
- Wang WC, Teah HY (2017) Life cycle assessment of small-scale horizontal axis wind turbines in Taiwan. *J Clean Prod* 141:492–501 . doi: 10.1016/j.jclepro.2016.09.128
- Wang X, Chen Y, Sui P, et al (2014b) Efficiency and sustainability analysis of biogas and electricity production from a large-scale biogas project in China: An emergy evaluation based on LCA. *J Clean Prod* 65:234–245 . doi: 10.1016/j.jclepro.2013.09.001
- Wang X, Kristensen T, Mogensen L, et al (2016b) Greenhouse gas emissions and land use from confinement dairy farms in the Guanzhong plain of China - Using a life cycle assessment approach. *J Clean Prod* 113:577–586 . doi: 10.1016/j.jclepro.2015.11.099
- Wang X, Wu X, Yan P, et al (2016c) Integrated analysis on economic and environmental consequences of livestock husbandry on different scale in China. *J Clean Prod* 119:1–12 . doi: 10.1016/j.jclepro.2016.01.084
- Wang X, Zou C, Zhang Y, et al (2018d) Environmental impacts of pepper (*Capsicum annuum* L) production affected by nutrient management: A case study in southwest China. *J Clean Prod* 171:934–943 . doi: 10.1016/j.jclepro.2017.09.258
- Wang Y, Feng K, Lu W (2017c) An environmental assessment and optimization method for contractors. *J Clean Prod* 142:1877–1891 . doi: 10.1016/j.jclepro.2016.11.097

- Wang Z biao, Chen J, Mao S chun, et al (2017d) Comparison of greenhouse gas emissions of chemical fertilizer types in China's crop production. *J Clean Prod* 141:1267–1274 . doi: 10.1016/j.jclepro.2016.09.120
- Wang Z, Li L, Zhang G (2018e) Life cycle greenhouse gas assessment of hydrogen production via chemical looping combustion thermally coupled steam reforming. *J Clean Prod* 179:335–346 . doi: 10.1016/j.jclepro.2018.01.063
- Wei W, Wang X, Zhu H, et al (2017) Carbon emissions of urban power grid in Jing-Jin-Ji region: Characteristics and influential factors. *J Clean Prod* 168:428–440 . doi: 10.1016/j.jclepro.2017.09.015
- Weldegiorgis FS, Franks DM (2014) Social dimensions of energy supply alternatives in steelmaking: Comparison of biomass and coal production scenarios in Australia. *J Clean Prod* 84:281–288 . doi: 10.1016/j.jclepro.2013.09.056
- Weldu YW, Assefa G (2017) The search for most cost-effective way of achieving environmental sustainability status in electricity generation: Environmental life cycle cost analysis of energy scenarios. *J Clean Prod* 142:2296–2304 . doi: 10.1016/j.jclepro.2016.11.047
- Welfens MJ, Nordmann J, Seibt A (2016) Drivers and barriers to return and recycling of mobile phones. Case studies of communication and collection campaigns. *J Clean Prod* 132:108–121 . doi: 10.1016/j.jclepro.2015.11.082
- Wen B, Jin Q, Huang H, et al (2017) Life cycle assessment of Quayside Crane: A case study in China. *J Clean Prod* 148:1–11 . doi: 10.1016/j.jclepro.2017.01.146
- Wen Z, Di J, Liu S, et al (2018) Evaluation of flue-gas treatment technologies for municipal waste incineration: A case study in Changzhou, China. *J Clean Prod* 184:912–920 . doi: 10.1016/j.jclepro.2018.02.282
- Wiedemann SG, McGahan EJ, Murphy CM (2017) Resource use and environmental impacts from Australian chicken meat production. *J Clean Prod* 140:675–684 . doi: 10.1016/j.jclepro.2016.06.086
- Wiloso EI, Heijungs R, Huppel G, Fang K (2016) Effect of biogenic carbon inventory on the life cycle assessment of bioenergy: Challenges to the neutrality assumption. *J Clean Prod* 125:78–85 . doi: 10.1016/j.jclepro.2016.03.096
- Wilson JM, Piya C, Shin YC, et al (2014) Remanufacturing of turbine blades by laser direct deposition with its energy and environmental impact analysis. *J Clean Prod* 80:170–178 . doi: 10.1016/j.jclepro.2014.05.084
- Winkler T, Schopf K, Aschemann R, Winiwarter W (2016) From farm to fork - A life cycle assessment of fresh Austrian pork. *J Clean Prod* 116:80–89 . doi: 10.1016/j.jclepro.2016.01.005
- Woon KS, Lo IMC (2014) Analyzing environmental hotspots of proposed landfill extension and advanced incineration facility in Hong Kong using life cycle assessment. *J Clean Prod* 75:64–74 . doi: 10.1016/j.jclepro.2014.03.066
- Wu L, Liu Y, Liang X, Kang L (2016) Multi-objective optimization for design of a steam system with drivers option in process industries. *J Clean Prod* 136:89–98 . doi: 10.1016/j.jclepro.2016.04.067
- Wu X, Wu K, Zhang Y, et al (2017) Comparative life cycle assessment and economic analysis of typical flue-gas cleaning processes of coal-fired power plants in China. *J Clean Prod* 142:3236–3242 . doi: 10.1016/j.jclepro.2016.10.146
- Wu Z, Wang M, Zheng J, et al (2018) Life cycle greenhouse gas emission reduction potential of battery electric vehicle. *J Clean Prod* 190:462–470 . doi: 10.1016/j.jclepro.2018.04.036
- Xia XH, Chen B, Wu XD, et al (2017) Coal use for world economy: Provision and transfer network by multi-region input-output analysis. *J Clean Prod* 143:125–144 . doi: 10.1016/j.jclepro.2016.12.142
- Xiang D, Gao L, Liu X, et al (2016) Water consumption analysis of olefins production from alternative resources in China. *J Clean Prod* 139:146–156 . doi: 10.1016/j.jclepro.2016.08.031
- Xie M, Bai W, Bai L, et al (2016) Life cycle assessment of the recycling of Al-PE (a laminated foil made from polyethylene and aluminum foil) composite packaging waste. *J Clean Prod* 112:4430–4434 . doi: 10.1016/j.jclepro.2015.08.067
- Xu M, Li C, Wang X, et al (2018) Optimal water utilization and allocation in industrial sectors based on water footprint accounting in Dalian City, China. *J Clean Prod* 176:1283–1291 . doi: 10.1016/j.jclepro.2017.11.203
- Xu X, Lan Y (2017) Spatial and temporal patterns of carbon footprints of grain crops in China. *J Clean Prod* 146:218–227 . doi: 10.1016/j.jclepro.2016.11.181

- Yang CH, Lee KC, Chen HC (2016a) Incorporating carbon footprint with activity-based costing constraints into sustainable public transport infrastructure project decisions. *J Clean Prod* 133:1154–1166 . doi: 10.1016/j.jclepro.2016.06.014
- Yang D, Liu J, Yang J, Ding N (2015) Life-cycle assessment of China's multi-crystalline silicon photovoltaic modules considering international trade. *J Clean Prod* 94:35–45 . doi: 10.1016/j.jclepro.2015.02.003
- Yang R, Ozer H, Al-Qadi IL (2016b) Regional upstream life-cycle impacts of petroleum products in the United States. *J Clean Prod* 139:1138–1149 . doi: 10.1016/j.jclepro.2016.08.164
- Yang X, Hu M, Wu J, Zhao B (2018) Building-information-modeling enabled life cycle assessment, a case study on carbon footprint accounting for a residential building in China. *J Clean Prod* 183:729–743 . doi: 10.1016/j.jclepro.2018.02.070
- Yao L, Liu T, Chen X, et al (2018) An integrated method of life-cycle assessment and system dynamics for waste mobile phone management and recycling in China. *J Clean Prod* 187:852–862 . doi: 10.1016/j.jclepro.2018.03.195
- Yi Z, Luo X, Yang Z, et al (2018) Thermo-economic-environmental optimization of a liquid separation condensation-based organic Rankine cycle driven by waste heat. *J Clean Prod* 184:198–210 . doi: 10.1016/j.jclepro.2018.01.095
- Yilmaz O, Anctil A, Karanfil T (2015) LCA as a decision support tool for evaluation of best available techniques (BATs) for cleaner production of iron casting. *J Clean Prod* 105:337–347 . doi: 10.1016/j.jclepro.2014.02.022
- Yu Y, Wang D, Huang K, et al (2014) Assessment of cathode active materials from the perspective of integrating environmental impact with electrochemical performance. *J Clean Prod* 82:213–220 . doi: 10.1016/j.jclepro.2014.06.069
- Yue J, Jiang X, Yuan X, et al (2017) Design of a multiplexed system for domestic wastewater of Happy Farmer's Home (HFH) and environmental evaluation using the emergy analysis. *J Clean Prod* 156:729–740 . doi: 10.1016/j.jclepro.2017.03.097
- Zaher U, Higgins S, Carpenter-Boggs L (2016) Interactive life cycle assessment framework to evaluate agricultural impacts and benchmark emission reduction credits from organic management. *J Clean Prod* 115:182–190 . doi: 10.1016/j.jclepro.2015.12.073
- Zambrana-Vasquez D, Aranda-Usón A, Zabalza-Bribián I, et al (2015) Environmental assessment of domestic solar hot water systems: A case study in residential and hotel buildings. *J Clean Prod* 88:29–42 . doi: 10.1016/j.jclepro.2014.06.035
- Zambrana-Vasquez D, Zabalza-Bribián I, Jáñez A, Aranda-Usón A (2016) Analysis of the environmental performance of life-cycle building waste management strategies in tertiary buildings. *J Clean Prod* 130:143–154 . doi: 10.1016/j.jclepro.2016.02.048
- Zanghelini GM, Cherubini E, Orsi P, Soares SR (2014) Waste management Life Cycle Assessment: The case of a reciprocating air compressor in Brazil. *J Clean Prod* 70:164–174 . doi: 10.1016/j.jclepro.2014.02.034
- Zhang JH, Chen M (2015) Assessing the impact of China's vehicle emission standards on diesel engine remanufacturing. *J Clean Prod* 107:177–184 . doi: 10.1016/j.jclepro.2015.03.103
- Zhang L, Huang H, Hu D, et al (2016) Greenhouse gases (GHG) emissions analysis of manufacturing of the hydraulic press slider within forging machine in China. *J Clean Prod* 113:565–576 . doi: 10.1016/j.jclepro.2015.11.053
- Zhang W, Guo J, Gu F, Gu X (2018) Coupling life cycle assessment and life cycle costing as an evaluation tool for developing product service system of high energy-consuming equipment. *J Clean Prod* 183:1043–1053 . doi: 10.1016/j.jclepro.2018.02.146
- Zhang Y, Duan S, Li J, et al (2017) Life cycle assessment of industrial symbiosis in Songmudao chemical industrial park, Dalian, China. *J Clean Prod* 158:192–199 . doi: 10.1016/j.jclepro.2017.04.119
- Zhang Y, Han Q (2017) Development of electric vehicles for China's power generation portfolio: A regional economic and environmental analysis. *J Clean Prod* 162:71–85 . doi: 10.1016/j.jclepro.2017.06.024
- Zhang Y, Luo X, Buis JJ, Sutherland JW (2015) LCA-oriented semantic representation for the product life cycle. *J Clean Prod* 86:146–162 . doi: 10.1016/j.jclepro.2014.08.053

- Zhao L, Zeng W, Yuan Z (2015) Reduction of potential greenhouse gas emissions of room air-conditioner refrigerants: A life cycle carbon footprint analysis. *J Clean Prod* 100:262–268 . doi: 10.1016/j.jclepro.2015.03.063
- Ziyadi M, Ozer H, Kang S, Al-Qadi IL (2018) Vehicle energy consumption and an environmental impact calculation model for the transportation infrastructure systems. *J Clean Prod* 174:424–436 . doi: 10.1016/j.jclepro.2017.10.292
- Zonderland-Thomassen MA, Lieffering M, Ledgard SF (2014) Water footprint of beef cattle and sheep produced in New Zealand: Water scarcity and eutrophication impacts. *J Clean Prod* 73:253–262 . doi: 10.1016/j.jclepro.2013.12.025
- Zucali M, Bacenetti J, Tamburini A, et al (2018) Environmental impact assessment of different cropping systems of home-grown feed for milk production. *J Clean Prod* 172:3734–3746 . doi: 10.1016/j.jclepro.2017.07.048
- Zucali M, Tamburini A, Sandrucci A, Bava L (2017) Global warming and mitigation potential of milk and meat production in Lombardy (Italy). *J Clean Prod* 153:474–482 . doi: 10.1016/j.jclepro.2016.11.037

## **2.2 Consequential life cycle assessment studies**

### **2.2.1 Uncertainty analysis performed**

#### **2.2.1a Monte Carlo-like approaches**

- Escobar N, Ribal J, Clemente G, Sanjuán N (2014) Consequential LCA of two alternative systems for biodiesel consumption in Spain, considering uncertainty. *J Clean Prod* 79:61–73 . doi: 10.1016/j.jclepro.2014.05.065
- Kawajiri K, Ihara T, Hatayama H, Tahara K (2018) Revealing hidden CO<sub>2</sub> impacts from consequential consumption by matrix analysis: Application to Japanese single households. *J Clean Prod* 172:582–590 . doi: 10.1016/j.jclepro.2017.10.043
- Lenglet J, Courtonne JY, Caurla S (2017) Material flow analysis of the forest-wood supply chain: A consequential approach for log export policies in France. *J Clean Prod* 165:1296–1305 . doi: 10.1016/j.jclepro.2017.07.177
- Niero M, Heinz C, Bagger R, Zwicky M (2015) How to manage uncertainty in future Life Cycle Assessment (LCA) scenarios addressing the effect of climate change in crop production. *J Clean Prod* 107:693–706 . doi: 10.1016/j.jclepro.2015.05.061
- Niero M, Pizzol M, Bruun HG, Thomsen M (2014) Comparative life cycle assessment of wastewater treatment in Denmark including sensitivity and uncertainty analysis. *J Clean Prod* 68:25–35 . doi: 10.1016/j.jclepro.2013.12.051
- Schmidt JH (2015) Life cycle assessment of five vegetable oils. *J Clean Prod* 87:130–138 . doi: 10.1016/j.jclepro.2014.10.011

#### **2.2.1b Probabilistic (other than Monte Carlo)**

- Havukainen J, Zhan M, Dong J, et al (2017) Environmental impact assessment of municipal solid waste management incorporating mechanical treatment of waste and incineration in Hangzhou, China. *J Clean Prod* 141:453–461 . doi: 10.1016/j.jclepro.2016.09.146

#### **2.2.1c Taylor series**

None.

#### **2.2.1d Scenario analysis**

None.

#### **2.2.1e Qualitative/pedigree**

None.

#### **2.2.1f Sensitivity analysis**

Bundgaard AM, Dalgaard R, Gilbert C, Thrane M (2014) Assessment of the potential of digestibility-improving enzymes to reduce greenhouse gas emissions from broiler production. *J Clean Prod* 73:218–226 . doi: 10.1016/j.jclepro.2013.12.055

### **2.2.1g Fuzzy logic**

None.

### **2.2.1h Bayesian**

None.

### **2.2.1i Regression**

None.

### **2.2.1j Not indicated/other**

None.

### **2.2.2 Uncertainty analysis reported as not performed**

None.

### **2.2.3 Uncertainty mentioned but no analysis performed**

Ahmadi A, Tiruta-Barna L, Benetto E, et al (2016) On the importance of integrating alternative renewable energy resources and their life cycle networks in the eco-design of conventional drinking water plants. *J Clean Prod* 135:872–883 . doi: 10.1016/j.jclepro.2016.06.201

Aracil C, Haro P, Giuntoli J, Ollero P (2017) Proving the climate benefit in the production of biofuels from municipal solid waste refuse in Europe. *J Clean Prod* 142:2887–2900 . doi: 10.1016/j.jclepro.2016.10.181

Bidstrup M, Pizzol M, Schmidt JH (2015) Life Cycle Assessment in spatial planning - A procedure for addressing systemic impacts. *J Clean Prod* 91:136–144 . doi: 10.1016/j.jclepro.2014.12.027

Busch J, Dawson D, Roelich K (2017) Closing the low-carbon material loop using a dynamic whole system approach. *J Clean Prod* 149:751–761 . doi: 10.1016/j.jclepro.2017.02.166

Dandres T, Farrahi Moghaddam R, Nguyen KK, et al (2017) Consideration of marginal electricity in real-time minimization of distributed data centre emissions. *J Clean Prod* 143:116–124 . doi: 10.1016/j.jclepro.2016.12.143

Dick M, Da Silva MA, Dewes H (2015) Mitigation of environmental impacts of beef cattle production in southern Brazil - Evaluation using farm-based life cycle assessment. *J Clean Prod* 87:58–67 . doi: 10.1016/j.jclepro.2014.10.087

Ertem FC, Neubauer P, Junne S (2017) Environmental life cycle assessment of biogas production from marine macroalgal feedstock for the substitution of energy crops. *J Clean Prod* 140:977–985 . doi: 10.1016/j.jclepro.2016.08.041

Garcia DJ, You F (2018) Addressing global environmental impacts including land use change in life cycle optimization: Studies on biofuels. *J Clean Prod* 182:313–330 . doi: 10.1016/j.jclepro.2018.02.012

Ghose A, Pizzol M, McLaren SJ (2017) Consequential LCA modelling of building refurbishment in New Zealand- an evaluation of resource and waste management scenarios. *J Clean Prod* 165:119–133 . doi: 10.1016/j.jclepro.2017.07.099

Glew D, Lovett PN (2014) Life cycle analysis of shea butter use in cosmetics: From parklands to product, low carbon opportunities. *J Clean Prod* 68:73–80 . doi: 10.1016/j.jclepro.2013.12.085

Hou D, Song Y, Zhang J, et al (2018) Climate change mitigation potential of contaminated land redevelopment: A city-level assessment method. *J Clean Prod* 171:1396–1406 . doi: 10.1016/j.jclepro.2017.10.071

Khoshnevisan B, Rafiee S, Tabatabaei M, et al (2017) Response to “Prognostication of energy use and environmental impacts for recycle system of municipal solid waste management.” *J Clean Prod* 164:1376–1379 . doi: 10.1016/j.jclepro.2017.07.030



- Khoshnevisan B, Tsapekos P, Alvarado-Morales M, et al (2018) Life cycle assessment of different strategies for energy and nutrient recovery from source sorted organic fraction of household waste. *J Clean Prod* 180:360–374 . doi: 10.1016/j.jclepro.2018.01.198
- Kimming M, Sundberg C, Nordberg, et al (2015) Replacing fossil energy for organic milk production - Potential biomass sources and greenhouse gas emission reductions. *J Clean Prod* 106:400–407 . doi: 10.1016/j.jclepro.2014.03.044
- Lansche J, Müller J (2017) Life cycle assessment (LCA) of biogas versus dung combustion household cooking systems in developing countries – A case study in Ethiopia. *J Clean Prod* 165:828–835 . doi: 10.1016/j.jclepro.2017.07.116
- Marvuglia A, Rege S, Navarrete Gutiérrez T, et al (2017) A return on experience from the application of agent-based simulations coupled with life cycle assessment to model agricultural processes. *J Clean Prod* 142:1539–1551 . doi: 10.1016/j.jclepro.2016.11.150
- Parajuli R, Kristensen IS, Knudsen MT, et al (2017) Environmental life cycle assessments of producing maize, grass-clover, ryegrass and winter wheat straw for biorefinery. *J Clean Prod* 142:3859–3871 . doi: 10.1016/j.jclepro.2016.10.076
- Pehme S, Veromann E, Hamelin L (2017) Environmental performance of manure co-digestion with natural and cultivated grass – A consequential life cycle assessment. *J Clean Prod* 162:1135–1143 . doi: 10.1016/j.jclepro.2017.06.067
- Petit-Boix A, Sevigné-Itoiz E, Rojas-Gutierrez LA, et al (2017) Floods and consequential life cycle assessment: Integrating flood damage into the environmental assessment of stormwater Best Management Practices. *J Clean Prod* 162:601–608 . doi: 10.1016/j.jclepro.2017.06.047
- Prosman EJ, Sacchi R (2018) New environmental supplier selection criteria for circular supply chains: Lessons from a consequential LCA study on waste recovery. *J Clean Prod* 172:2782–2792 . doi: 10.1016/j.jclepro.2017.11.134
- Salemdeeb R, zu Ermgassen EKJ, Kim MH, et al (2017) Environmental and health impacts of using food waste as animal feed: a comparative analysis of food waste management options. *J Clean Prod* 140:871–880 . doi: 10.1016/j.jclepro.2016.05.049
- Sevigné-Itoiz E, Gasol CM, Rieradevall J, Gabarrell X (2015) Methodology of supporting decision-making of waste management with material flow analysis (MFA) and consequential life cycle assessment (CLCA): Case study of waste paper recycling. *J Clean Prod* 105:253–262 . doi: 10.1016/j.jclepro.2014.07.026
- Sørensen BL, Wenzel H (2014) Life cycle assessment of alternative bedpans - A case of comparing disposable and reusable devices. *J Clean Prod* 83:70–79 . doi: 10.1016/j.jclepro.2014.07.022
- Su M, Chen C, Yang Z (2016) Urban energy structure optimization at the sector scale: Considering environmental impact based on life cycle assessment. *J Clean Prod* 112:1464–1474 . doi: 10.1016/j.jclepro.2015.01.059
- Thyberg KL, Tonjes DJ (2017) The environmental impacts of alternative food waste treatment technologies in the U.S. *J Clean Prod* 158:101–108 . doi: 10.1016/j.jclepro.2017.04.169
- Tomei MC, Bertanza G, Canato M, et al (2016) Techno-economic and environmental assessment of upgrading alternatives for sludge stabilization in municipal wastewater treatment plants. *J Clean Prod* 112:3106–3115 . doi: 10.1016/j.jclepro.2015.10.017
- Valsasina L, Pizzol M, Smetana S, et al (2017) Life cycle assessment of emerging technologies: The case of milk ultra-high pressure homogenisation. *J Clean Prod* 142:2209–2217 . doi: 10.1016/j.jclepro.2016.11.059
- Wang Y, Yan Y, Chen G, et al (2017) Effectiveness of waste-to-energy approaches in China: from the perspective of greenhouse gas emission reduction. *J Clean Prod* 163:99–105 . doi: 10.1016/j.jclepro.2015.09.060
- Ylmén P, Berlin J, Mjörnell K, Arfvidsson J (2017) The importance of including secondary effects when defining the system boundary with life cycle perspective: Case study for design of an external wall. *J Clean Prod* 143:1105–1113 . doi: 10.1016/j.jclepro.2016.12.009

#### **2.2.4 No mention of uncertainty**

- Adamczyk J, Dylewski R (2017) Analysis of the sensitivity of the ecological effects for the investment based on the thermal insulation of the building: A Polish case study. *J Clean Prod* 162:856–864 . doi: 10.1016/j.jclepro.2017.06.123

- Brander M (2016) Transposing lessons between different forms of consequential greenhouse gas accounting: Lessons for consequential life cycle assessment, project-level accounting, and policy-level accounting. *J Clean Prod* 112:4247–4256 . doi: 10.1016/j.jclepro.2015.05.101
- Chang FC, Ko CH, Yang PY, et al (2017) Carbon sequestration and substitution potential of subtropical mountain Sugi plantation forests in central Taiwan. *J Clean Prod* 167:1099–1105 . doi: 10.1016/j.jclepro.2016.08.016
- Chatterton J, Graves A, Audsley E, et al (2015) Using systems-based life cycle assessment to investigate the environmental and economic impacts and benefits of the livestock sector in the UK. *J Clean Prod* 86:1–8 . doi: 10.1016/j.jclepro.2014.05.103
- Chiusano L, Cerutti AK, Cravero MC, et al (2015) An Industrial Ecology approach to solve wine surpluses problem: The case study of an Italian winery. *J Clean Prod* 91:56–63 . doi: 10.1016/j.jclepro.2014.12.002
- Freire-González J, Font Vivanco D (2017) The influence of energy efficiency on other natural resources use: An input-output perspective. *J Clean Prod* 162:336–345 . doi: 10.1016/j.jclepro.2017.06.050
- Geng A, Zhang H, Yang H (2017) Greenhouse gas reduction and cost efficiency of using wood flooring as an alternative to ceramic tile: A case study in China. *J Clean Prod* 166:438–448 . doi: 10.1016/j.jclepro.2017.08.058
- Goldstein B, Hauschild M, Fernández J, Birkved M (2016) Testing the environmental performance of urban agriculture as a food supply in northern climates. *J Clean Prod* 135:984–994 . doi: 10.1016/j.jclepro.2016.07.004
- Hafner A, Schäfer S (2017) Comparative LCA study of different timber and mineral buildings and calculation method for substitution factors on building level. *J Clean Prod* 167:630–642 . doi: 10.1016/j.jclepro.2017.08.203
- Jeong K, Ji C, Koo C, et al (2015) A model for predicting the environmental impacts of educational facilities in the project planning phase. *J Clean Prod* 107:538–549 . doi: 10.1016/j.jclepro.2014.01.027
- Jones C, Gilbert P (2018) Determining the consequential life cycle greenhouse gas emissions of increased rooftop photovoltaic deployment. *J Clean Prod* 184:211–219 . doi: 10.1016/j.jclepro.2018.02.140
- Li Z, Sun L, Geng Y, et al (2017) Examining industrial structure changes and corresponding carbon emission reduction effect by combining input-output analysis and social network analysis: A comparison study of China and Japan. *J Clean Prod* 162:61–70 . doi: 10.1016/j.jclepro.2017.05.200
- Lyng KA, Stensgård AE, Hanssen OJ, Modahl IS (2018) Relation between greenhouse gas emissions and economic profit for different configurations of biogas value chains: A case study on different levels of sector integration. *J Clean Prod* 182:737–745 . doi: 10.1016/j.jclepro.2018.02.126
- Nguyen TA, Maeda Y, Kuroda K, Otsuka K (2017) Inclusive impact assessment for the sustainability of vegetable oil-based biodiesel - Part II: Sustainability assessment of inedible vegetable oil-based biodiesel in Ha Long Bay, Vietnam. *J Clean Prod* 168:173–188 . doi: 10.1016/j.jclepro.2017.08.238
- Nordenstam L, Djuric Ilic D, Ödlund L (2018) Corporate greenhouse gas inventories, guarantees of origin and combined heat and power production – Analysis of impacts on total carbon dioxide emissions. *J Clean Prod* 186:203–214 . doi: 10.1016/j.jclepro.2018.03.034
- O'Reilly CJ, Göransson P, Funazaki A, et al (2016) Life cycle energy optimisation: A proposed methodology for integrating environmental considerations early in the vehicle engineering design process. *J Clean Prod* 135:750–759 . doi: 10.1016/j.jclepro.2016.06.163
- Onat NC, Kucukvar M, Tatari O, Zheng QP (2016) Combined application of multi-criteria optimization and life-cycle sustainability assessment for optimal distribution of alternative passenger cars in U.S. *J Clean Prod* 112:291–307 . doi: 10.1016/j.jclepro.2015.09.021
- Permpool N, Gheewala SH (2017) Environmental and energy assessment of alternative fuels for diesel in Thailand. *J Clean Prod* 142:1176–1182 . doi: 10.1016/j.jclepro.2016.08.081
- Tascione V, Mosca R, Raggi A (2016) Optimizing the environmental performance of integrated waste management scenarios by means of linear programming: A case study. *J Clean Prod* 112:3086–3096 . doi: 10.1016/j.jclepro.2015.10.016

- Thomsen M, Seghetta M, Mikkelsen MH, et al (2017) Comparative life cycle assessment of biowaste to resource management systems – A Danish case study. *J Clean Prod* 142:4050–4058 . doi: 10.1016/j.jclepro.2016.10.034
- Yang Y (2016) Two sides of the same coin: consequential life cycle assessment based on the attributional framework. *J Clean Prod* 127:274–281 . doi: 10.1016/j.jclepro.2016.03.089
- Zackrisson M, Fransson K, Hildenbrand J, et al (2016) Life cycle assessment of lithium-air battery cells. *J Clean Prod* 135:299–311 . doi: 10.1016/j.jclepro.2016.06.104
- Zhao Y, Xu J, Xie X, Yu H (2014) An integrated environmental impact assessment of corn-based polyols compared with petroleum-based polyols production. *J Clean Prod* 68:272–278 . doi: 10.1016/j.jclepro.2013.12.049

## **2.3 Combination attributional and consequential life cycle assessment studies**

### **2.3.1 Uncertainty analysis performed**

#### **2.3.1a Monte Carlo-like approaches**

- Dudley QM, Liska AJ, Watson AK, Erickson GE (2014) Uncertainties in life cycle greenhouse gas emissions from U.S. beef cattle. *J Clean Prod* 75:31–39 . doi: 10.1016/j.jclepro.2014.03.087

#### **2.3.1b Probabilistic (other than Monte Carlo)**

None.

#### **2.3.1c Taylor series**

None.

#### **2.3.1d Scenario analysis**

None.

#### **2.3.1e Qualitative/pedigree**

- Vieira DR, Bravo A (2016) Life cycle carbon emissions assessment using an eco-demonstrator aircraft: The case of an ecological wing design. *J Clean Prod* 124:246–257 . doi: 10.1016/j.jclepro.2016.02.089

#### **2.3.1f Sensitivity analysis**

- Peng S, Li T, Tang Z, et al (2016) Comparative life cycle assessment of remanufacturing cleaning technologies. *J Clean Prod* 137:475–489 . doi: 10.1016/j.jclepro.2016.07.120

#### **2.3.1g Fuzzy logic**

None.

#### **2.3.1h Bayesian**

None.

#### **2.3.1i Regression**

None.

#### **2.3.1j Not indicated/other**

None.

### **2.3.2 Uncertainty analysis reported as not performed**

None.

### **2.3.3 Uncertainty mentioned but no analysis performed**

- Brander M (2017) Comparative analysis of attributional corporate greenhouse gas accounting, consequential life cycle assessment, and project/policy level accounting: A bioenergy case study. *J Clean Prod* 167:1401–1414 . doi: 10.1016/j.jclepro.2017.02.097
- Buyle M, Braet J, Audenaert A, Debacker W (2018) Strategies for optimizing the environmental profile of dwellings in a Belgian context: A consequential versus an attributional approach. *J Clean Prod* 173:235–244 . doi: 10.1016/j.jclepro.2016.08.114
- Choma EF, Ugaya CML (2017) Environmental impact assessment of increasing electric vehicles in the Brazilian fleet. *J Clean Prod* 152:497–507 . doi: 10.1016/j.jclepro.2015.07.091
- Dalgaard R, Schmidt J, Flysjö A (2014) Generic model for calculating carbon footprint of milk using four different life cycle assessment modelling approaches. *J Clean Prod* 73:146–153 . doi: 10.1016/j.jclepro.2014.01.025
- Eriksson M, Ghosh R, Hansson E, et al (2018) Environmental consequences of introducing genetically modified soy feed in Sweden. *J Clean Prod* 176:46–53 . doi: 10.1016/j.jclepro.2017.12.113
- Kovacic I, Waltenbereger L, Gourlis G (2016) Tool for life cycle analysis of facade-systems for industrial buildings. *J Clean Prod* 130:260–272 . doi: 10.1016/j.jclepro.2015.10.063
- Kua HW, Lu Y (2016) Environmental impacts of substituting tempered glass with polycarbonate in construction – An attributional and consequential life cycle perspective. *J Clean Prod* 137:910–921 . doi: 10.1016/j.jclepro.2016.07.171
- Lee DY, Thomas VM (2017) Parametric modeling approach for economic and environmental life cycle assessment of medium-duty truck electrification. *J Clean Prod* 142:3300–3321 . doi: 10.1016/j.jclepro.2016.10.139
- Prapasongsa T, Gheewala SH (2016) Risks of indirect land use impacts and greenhouse gas consequences: an assessment of Thailand’s bioethanol policy. *J Clean Prod* 134:563–573 . doi: 10.1016/j.jclepro.2015.05.091
- Sandin G, Røyne F, Berlin J, et al (2015) Allocation in LCAs of biorefinery products: Implications for results and decision-making. *J Clean Prod* 93:213–221 . doi: 10.1016/j.jclepro.2015.01.013

#### **2.3.4 No mention of uncertainty**

- Djuric Ilic D, Dotzauer E, Trygg L, Broman G (2014) Introduction of large-scale biofuel production in a district heating system - An opportunity for reduction of global greenhouse gas emissions. *J Clean Prod* 64:552–561 . doi: 10.1016/j.jclepro.2013.08.029
- García-Montoya M, Sengupta D, Nápoles-Rivera F, et al (2016) Environmental and economic analysis for the optimal reuse of water in a residential complex. *J Clean Prod* 130:82–91 . doi: 10.1016/j.jclepro.2015.06.109
- Kua HW, Kamath S (2014) An attributional and consequential life cycle assessment of substituting concrete with bricks. *J Clean Prod* 81:190–200 . doi: 10.1016/j.jclepro.2014.06.006
- Prapasongsa T, Musikavong C, Gheewala SH (2017) Life cycle assessment of palm biodiesel production in Thailand: Impacts from modelling choices, co-product utilisation, improvement technologies, and land use change. *J Clean Prod* 153:435–447 . doi: 10.1016/j.jclepro.2017.03.130

### **3. Sustainability**

#### **3.1 Attributional life cycle assessment studies**

##### **3.1.1 Uncertainty analysis performed**

###### **3.1.1a Monte Carlo-like approaches**

- Baek CY, Park KH, Tahara K, Chun YY (2017) Data quality assessment of the uncertainty analysis applied to the greenhouse gas emissions of a dairy cow system. *Sustainability* 9:1–17 . doi: 10.3390/su9101676
- Falcone G, De Luca AI, Stillitano T, et al (2016) Assessment of environmental and economic impacts of vine-growing combining life cycle assessment, life cycle costing and multicriterial analysis. *Sustainability* 8:1–34 . doi: 10.3390/su8080793

- García BG, Jiménez CR, Aguado-Giménez F, García JG (2016) Life cycle assessment of gilthead seabream (*Sparus aurata*) production in offshore fish farms. *Sustainability* 8:1–19 . doi: 10.3390/su8121228
- Günkaya Z, Özdemir A, Özkan A, Banar M (2016) Environmental performance of electricity generation based on resources: A life cycle assessment case study in Turkey. *Sustainability* 8:1–14 . doi: 10.3390/su8111097
- Meyer-Aurich A, Lochmann Y, Klauss H, Prochnow A (2016) Comparative advantage of maize- and grass-silage based feedstock for biogas production with respect to greenhouse gas mitigation. *Sustainability* 8:1–14 . doi: 10.3390/su8070617

### **3.1.1b Probabilistic (other than Monte Carlo)**

- Goulet B, Olson L, Mayer BK (2017) A comparative life cycle assessment between a metered dose inhaler and electric nebulizer. *Sustainability* 9:1–13 . doi: 10.3390/su9101725

### **3.1.1c Taylor series**

None.

### **3.1.1d Scenario analysis**

None.

### **3.1.1e Qualitative/pedigree**

- Penadés-Plà V, García-Segura T, Martí J V., Yepes V (2018) An optimization-LCA of a prestressed concrete precast bridge. *Sustainability* 10:1–17 . doi: 10.3390/su10030685
- Penadés-Plà V, Martí J V., García-Segura T, Yepes V (2017) Life-cycle assessment: A comparison between two optimal post-tensioned concrete box-girder road bridges. *Sustainability* 9:1–21 . doi: 10.3390/su9101864

### **3.1.1f Sensitivity analysis**

- Oliveira MC, Magrini A (2017) Life cycle assessment of lubricant oil plastic containers in Brazil. *Sustainability* 9:1–16 . doi: 10.3390/su9040576

### **3.1.1g Fuzzy logic**

None.

### **3.1.1h Bayesian**

None.

### **3.1.1i Regression**

None.

### **3.1.1j Not indicated/other**

None.

### **3.1.2 Uncertainty analysis reported as not performed**

- Hao H, Mu Z, Jiang S, et al (2017) GHG Emissions from the Production of Lithium-Ion Batteries for Electric Vehicles in China. *Sustainability* 9:1–12 . doi: 10.3390/su9040504

### **3.1.3 Uncertainty mentioned but no analysis performed**

- Amasawa E, Suzuki Y, Moon D, et al (2018) Designing interventions for behavioral shifts toward product sharing: The case of laundry activities in Japan. *Sustainability* 10:1–20 . doi: 10.3390/su10082687
- Broun R, Babaizadeh H, Zakersalehi A, Menzies GF (2014) Integrated life cycle energy and greenhouse gas analysis of exterior wall systems for residential buildings. *Sustainability* 6:8592–8603 . doi: 10.3390/su6128592

- Condeixa K, Qualharini E, Boer D, Haddad A (2015) An inquiry into the life cycle of systems of inner walls: Comparison of masonry and drywall. *Sustainability* 7:7904–7925 . doi: 10.3390/su7067904
- De Feo G, Ferrara C, Iuliano G (2016) Comparative Life Cycle Assessment (LCA) of two on-site small-scale activated sludge total oxidation systems in plastic and vibrated reinforced concrete. *Sustainability* 8:1–17 . doi: 10.3390/su8030212
- Gómez-García DC, Gómez-Soberón JM, Corral-Higuera R, et al (2018) A cradle to handover life cycle assessment of external walls: Choice of materials and prognosis of elements. *Sustainability* 10:1–24 . doi: 10.3390/su10082748
- Gernaey B, Sorbara JOB, Nielsen PH (2018) Environmental Assessment of amylase used as digestibility improvement factor for intensive chicken production in Brazil. *Sustainability* 10:1–12 . doi: 10.3390/su10082735
- Gervasio H, Dimova S, Pinto A (2018) Benchmarking the life-cycle environmental performance of buildings. *Sustainability* 10:1–30 . doi: 10.3390/su10051454
- Hafner A (2017) How building with wood can be linked to sales of building plots: Results from an exemplary site development in Munich, Germany. *Sustainability* 9:1–16 . doi: 10.3390/su9060947
- Hannouf M, Assefa G (2017) Life cycle sustainability assessment for sustainability improvements: A case study of high-density polyethylene production in Alberta, Canada. *Sustainability* 9:1–17 . doi: 10.3390/su9122332
- Hansen A, Budde J, Prochnow A (2016) Resource usage strategies and trade-Offs between cropland demand, fossil fuel consumption, and greenhouse gas emissions-building insulation as an example. *Sustainability* 8:1–24 . doi: 10.3390/su8070613
- Hanserud OS, Lyng KA, De Vries JW, et al (2017) Redistributing phosphorus in animal manure from a livestock-intensive region to an Arable region: Exploration of environmental consequences. *Sustainability* 9:1–21 . doi: 10.3390/su9040595
- Helmes RJK, López-Contreras AM, Benoit M, et al (2018) Environmental impacts of experimental production of lactic acid for bioplastics from *Ulva* spp. *Sustainability* 10:1–15 . doi: 10.3390/su10072462
- Hong T, Kim J, Chae M, et al (2016) Sensitivity Analysis on the Impact Factors of the GSHP System Considering Energy Generation and Environmental Impact Using LCA. *Sustainability* 8:1–28 . doi: 10.3390/su8040376
- Hu AH, Huang LH, Lou S, et al (2017) Assessment of the carbon footprint, social benefit of carbon reduction, and energy payback time of a high-concentration photovoltaic system. *Sustainability* 9:1–20 . doi: 10.3390/su9010027
- Inakollu S, Morin R, Keefe R (2017) Carbon footprint estimation in fiber optics industry: A case study of OFS Fitel, LLC. *Sustainability* 9:1–16 . doi: 10.3390/su9050865
- Jiang T, Shen Z, Liu Y, Hou Y (2018) Carbon footprint assessment of four normal size hydropower stations in China. *Sustainability* 10:1–14 . doi: 10.3390/su10062018
- Kim S, Kim T, Smith TM, Suh K (2018) Environmental implications of eco-labeling for rice farming systems. *Sustainability* 10:1–19 . doi: 10.3390/su10041050
- Kjaer LL, Høst-Madsen NK, Schmidt JH, McAloone TC (2015) Application of environmental input-output analysis for corporate and product environmental footprints-learnings from three cases. *Sustainability* 7:11438–11461 . doi: 10.3390/su70911438
- Kluczek A (2017) Quick Green Scan: a methodology for improving green performance in terms of manufacturing processes. *Sustainability* 9:1–28 . doi: 10.3390/su9010088
- Kommalapati RR, Hossan I, Botlaguduru VSV, et al (2018) Life cycle environmental impact of biomass co-firing with coal at a power plant in the greater Houston area. *Sustainability* 10:1–18 . doi: 10.3390/su10072193
- Kono J, Ostermeyer Y, Wallbaum H (2018) Trade-off between the social and environmental performance of green concrete: The case of 6 countries. *Sustainability* 10:1–14 . doi: 10.3390/su10072309
- Lee LC, Wang Y, Yan Y, Zuo J (2018) Greenhouse gas emissions embodied in the Chinese international trade of computer products. *Sustainability* 10:1–15 . doi: 10.3390/su10051623
- Li L, Wu W, Giller P, et al (2018) Life cycle assessment of a highly diverse vegetable multi-cropping system in Fengqiu County, China. *Sustainability* 10:1–17 . doi: 10.3390/su10040983

- Liu Y, Guo H, Sun C, Chang WS (2016) Assessing cross laminated timber (CLT) as an alternative material for mid-rise residential buildings in cold regions in China-A life-cycle assessment approach. *Sustainability* 8:1–13 . doi: 10.3390/su8101047
- Lwin CM, Nogi A, Hashimoto S (2017) Eco-efficiency assessment of material use: The case of phosphorus fertilizer usage in Japan's rice sector. *Sustainability* 9:1–13 . doi: 10.3390/su9091562
- Martin M, Brandão M (2017) Evaluating the environmental consequences of Swedish food consumption and dietary choices. *Sustainability* 9:1–21 . doi: 10.3390/su9122227
- Middel H, Verones F (2017) Making marine noise pollution impacts heard: The case of cetaceans in the North Sea within life cycle impact assessment. *Sustainability* 9:1–17 . doi: 10.3390/su9071138
- Mitterpach J, Hroncová E, Lodomerský J, Balco K (2015) Identification of significant impact of silicon foundry sands mining on LCIA. *Sustainability* 7:16408–16421 . doi: 10.3390/su71215822
- Mitterpach J, Hroncová E, Lodomerský J, Štefko J (2016) Quantification of improvement in environmental quality for old residential buildings using life cycle assessment. *Sustainability* 8:1–12 . doi: 10.3390/su8121303
- Murphy F, Devlin G, McDonnell K (2015) Benchmarking environmental impacts of peat use for electricity generation in Ireland-A life cycle assessment. *Sustainability* 7:6376–6393 . doi: 10.3390/su7066376
- Navajas A, Uriarte L, Gandía LM (2017) Application of eco-design and life cycle assessment standards for environmental impact reduction of an industrial product. *Sustainability* 9:1–16 . doi: 10.3390/su9101724
- Navarro IJ, Yepes V, Martí J V. (2018) Life cycle cost assessment of preventive strategies applied to prestressed concrete bridges exposed to chlorides. *Sustainability* 10:1–16 . doi: 10.3390/su10030845
- Onat NC, Kucukvar M, Tatari O (2014) Towards life cycle sustainability assessment of alternative passenger vehicles
- Opatokun SA, Lopez-Sabiron AM, Ferreira G, Strezov V (2017) Life cycle analysis of energy production from food waste through anaerobic digestion, pyrolysis and integrated energy system. *Sustainability* 9:1–15 . doi: 10.3390/su9101804
- Papong S, Itsubo N, Malakul P, Shukuya M (2015) Development of the social inventory database in Thailand using input-output analysis. *Sustainability* 7:7684–7713 . doi: 10.3390/su7067684
- Pelletier N (2018) Social sustainability assessment of Canadian egg production facilities: Methods, analysis, and recommendations. *Sustainability* 10:1–17 . doi: 10.3390/su10051601
- Pettersen JB, Song X (2017) Life cycle impact assessment in the arctic: Challenges and research needs. *Sustainability* 9:1–20 . doi: 10.3390/su9091605
- Piastrellini R, Civit BM, Arena AP (2015) Influence of agricultural practices on biotic production potential and climate regulation potential. A case study for life cycle assessment of soybean (*Glycine max*) in Argentina. *Sustainability* 7:4386–4410 . doi: 10.3390/su7044386
- Pushkar S (2016) Life Cycle Assessment of flat roof technologies for office buildings in Israel. *Sustainability* 8:1–10 . doi: 10.3390/su8010054
- Rashid AFA, Idris J, Yusoff S (2017) Environmental impact analysis on residential building in Malaysia using life cycle assessment. *Sustainability* 9:1–15 . doi: 10.3390/su9030329
- Russo C, Cappelletti GM, Nicoletti GM, et al (2016) Comparison of European olive production systems. *Sustainability* 8:1–11 . doi: 10.3390/su8080825
- Santos IV, Bulle C, Levasseur A, Deschênes L (2018) Regionalized terrestrial ecotoxicity assessment of copper-based fungicides applied in viticulture. *Sustainability* 10:1–16 . doi: 10.3390/su10072522
- Schulte J, Ny H (2018) Electric road systems: Strategic stepping stone on the way towards sustainable freight transport? *Sustainability* 10:1–16 . doi: 10.3390/su10041148
- Serrano AÁR, Álvarez SP (2016) Life cycle assessment in building: A case study on the energy and emissions impact related to the choice of housing typologies and construction process in Spain. *Sustainability* 8:1–29 . doi: 10.3390/su8030287
- Sharp H, Grundius J, Heinonen J (2016) Carbon footprint of inbound tourism to Iceland: A consumption-based life-cycle assessment including direct and indirect emissions. *Sustainability* 8:1–23 . doi: 10.3390/su8111147

- Stefanova M, Tripepi C, Zamagni A, Masoni P (2014) Goal and scope in life cycle sustainability analysis: The case of hydrogen production from biomass. *Sustainability* 6:5463–5475 . doi: 10.3390/su6085463
- Suhariyanto TT, Wahab DA, Rahman MNA (2018) Product design evaluation using life cycle assessment and design for assembly: A case study of a water leakage alarm. *Sustainability* 10:1–26 . doi: 10.3390/su10082821
- Švajlenka J, Kozlovská M (2018) Houses based on wood as an ecological and sustainable housing alternative- Case study. *Sustainability* 10:1–20 . doi: 10.3390/su10051502
- Torquati B, Venanzi S, Ciani A, et al (2014) Environmental sustainability and economic benefits of dairy farm biogas energy production: A case study in Umbria. *Sustainability* 6:6696–6713 . doi: 10.3390/su6106696
- Tseng YC, Lee YM, Liao SJ (2017) An integrated assessment framework of offshore wind power projects applying equator principles and social life cycle assessment. *Sustainability* 9:1–17 . doi: 10.3390/su9101822
- Vitiello U, Salzano A, Asprone D, et al (2016) Life-cycle assessment of seismic retrofit strategies applied to existing building structures. *Sustainability* 8:1–18 . doi: 10.3390/su8121275
- Wang T, Richard Teague W, Park SC, Bevers S (2015) GHG mitigation potential of different grazing strategies in the United States Southern Great Plains. *Sustainability* 7:13500–13521 . doi: 10.3390/su71013500
- Wettstein S, Muir K, Scharfy D, Stucki M (2017) The environmental mitigation potential of photovoltaic-powered irrigation in the production of South African Maize. *Sustainability* 9:1–20 . doi: 10.3390/su9101772
- Yano S, Hanasaki N, Itsubo N, Oki T (2015) Water scarcity footprints by considering the differences in water sources. *Sustainability* 7:9753–9772 . doi: 10.3390/su7089753
- Yu M, Halog A (2015) Solar photovoltaic development in Australia-a life cycle sustainability assessment study
- Zhang Y (2017) Taking the time characteristic into account of life cycle assessment: Method and application for buildings. *Sustainability* 9:1–14 . doi: 10.3390/su9060922

### **3.1.4 No mention of uncertainty**

- Akyüz MK, Altuntaş Ö, Söğüt MZ (2017) Economic and environmental optimization of an airport terminal building's wall and roof insulation. *Sustainability* 9:1–18 . doi: 10.3390/su9101849
- Arnal ÁJ, Royo P, Pataro G, et al (2018) Implementation of PEF treatment at real-scale tomatoes processing considering LCA methodology as an innovation strategy in the agri-food sector. *Sustainability* 10:1–16 . doi: 10.3390/su10040979
- Astiaso Garcia D, Di Matteo U, Cumo F (2015) Selecting eco-friendly thermal systems for the “Vittoriale Degli Italiani” historic museum building. *Sustainability* 7:12615–12633 . doi: 10.3390/su70912615
- Balafoutis AT, Koundouras S, Anastasiou E, et al (2017) Life cycle assessment of two vineyards after the application of precision viticulture techniques: A case study. *Sustainability* 9:1–19 . doi: 10.3390/su9111997
- Baudino C, Giuggioli NR, Briano R, et al (2017) Integrated methodologies (SWOT, TOWS, LCA) for improving production chains and environmental sustainability of kiwifruit and baby kiwi in Italy. *Sustainability* 9:1–18 . doi: 10.3390/su9091621
- Bonamente E, Pelliccia L, Merico MC, et al (2015) The multifunctional environmental energy tower: Carbon footprint and land use analysis of an integrated renewable energy plant. *Sustainability* 7:13564–13584 . doi: 10.3390/su71013564
- Bortolini M, Gamberi M, Mora C, et al (2017) Design, prototyping, and assessment of a wastewater closed-loop recovery and purification system. *Sustainability* 9:1–12 . doi: 10.3390/su9111938
- Caputo P, Ducoli C, Clementi M (2014) Strategies and tools for eco-efficient local food supply scenarios. *Sustainability* 6:631–651 . doi: 10.3390/su6020631
- Cecchini L, Torquati B, Paffarini C, et al (2016) The milk supply chain in Italy's Umbria Region: Environmental and economic sustainability. *Sustainability* 8:1–15 . doi: 10.3390/su8080728
- Changwichan K, Silalertruksa T, Gheewala SH (2018) Eco-efficiency assessment of bioplastics production systems and end-of-life options. *Sustainability* 10:1–15 . doi: 10.3390/su10040952



- Chipindula J, Botlaguduru VSV, Du H, et al (2018) Life cycle environmental impact of onshore and offshore wind farms in Texas. *Sustainability* 10:1–18 . doi: 10.3390/su10062022
- Cho SH, Chae CU (2016) A study on life cycle CO<sub>2</sub> emissions of low-carbon building in South Korea. *Sustainability* 8:1–19 . doi: 10.3390/su8060579
- Choi B, Yoo S, Park S II (2018) Carbon footprint of packaging films made from LDPE, PLA, and PLA/PBAT blends in South Korea. *Sustainability* 10:1–11 . doi: 10.3390/su10072369
- Claudelin A, Uusitalo V, Pekkola S, et al (2017) The role of consumers in the transition toward low-carbon living. *Sustainability* 9:1–15 . doi: 10.3390/su9060958
- De Feo G, Ferrara C, Iuliano C, Grosso A (2016) LCA of the collection, transportation, treatment and disposal of source separated municipal waste: A Southern Italy case study. *Sustainability* 8:1–13 . doi: 10.3390/su8111084
- Dong L, Wang Y, Li HX, et al (2018) Carbon reduction measures-based LCA of prefabricated temporary housing with renewable energy systems. *Sustainability* 10:1–22 . doi: 10.3390/su10030718
- Elduque A, Javierre C, Elduque D, Fernández Á (2015) LCI databases sensitivity analysis of the environmental impact of the injection molding process. *Sustainability* 7:3792–3800 . doi: 10.3390/su7043792
- Fan W, Zhang P, Xu Z, et al (2018) Life cycle environmental impact assessment of circular agriculture: A case study in Fuqing, China. *Sustainability* 10:1–19 . doi: 10.3390/su10061810
- Galán-Marín C, Martínez-Rocamora A, Solís-Guzmán J, Rivera-Gómez C (2018) Natural stabilized earth panels versus conventional façade systems. Economic and environmental impact assessment. *Sustainability* 10:1–13 . doi: 10.3390/su10041020
- Galve JE, Elduque D, Pina C, Javierre C (2016) Sustainable supply chain management: The influence of disposal scenarios on the environmental impact of a 2400 L waste container. *Sustainability* 8:1–12 . doi: 10.3390/su8060564
- Gong Y, Song D (2015) Life cycle building carbon emissions assessment and driving factors decomposition analysis based on LMDI-A case study of Wuhan city in China. *Sustainability* 7:16670–16686 . doi: 10.3390/su71215838
- Grbeš A (2016) A life cycle assessment of silica sand: Comparing the beneficiation processes. *Sustainability* 8:1–9 . doi: 10.3390/su8010011
- Guo C, Wang X, Li Y, et al (2018) Carbon footprint analyses and potential carbon emission reduction in China's major peach orchards. *Sustainability* 10:1–17 . doi: 10.3390/su10082908
- Guo H, Liu Y, Meng Y, et al (2017) A Comparison of the energy saving and carbon reduction performance between reinforced concrete and cross-laminated timber structures in residential buildings in the severe cold region of China. *Sustainability* 9:1–15 . doi: 10.3390/su9081426
- Kim H, Holme P (2015) Network theory integrated life cycle assessment for an electric power system. *Sustainability* 7:10961–10975 . doi: 10.3390/su70810961
- Kim T, Chae CU (2016a) Evaluation analysis of the CO<sub>2</sub> emission and absorption life cycle for precast concrete in Korea. *Sustainability* 8:1–13 . doi: 10.3390/su8070663
- Kim T, Lee S, Chae CU, et al (2017) Development of the CO<sub>2</sub> emission evaluation tool for the life cycle assessment of concrete. *Sustainability* 9:1–14 . doi: 10.3390/su9112116
- Kim T, Tae S, Chae CU (2016a) Analysis of environmental impact for concrete using LCA by varying the recycling components, the compressive strength and the admixture material mixing. *Sustainability* 8:1–14 . doi: 10.3390/su8040389
- Kim TH, Chae CU (2016b) Environmental impact analysis of acidification and eutrophication due to emissions from the production of concrete. *Sustainability* 8:1–20 . doi: 10.3390/su8060578
- Kim TH, Chae CU, Kim GH, Jang HJ (2016b) Analysis of CO<sub>2</sub> emission characteristics of concrete used at construction sites. *Sustainability* 8:1–14 . doi: 10.3390/su8040348
- Kim TH, Tae SH, Chae CU, Choi WY (2016c) The environmental impact and cost analysis of concrete mixing blast furnace slag containing titanium gypsum and sludge in South Korea. *Sustainability* 8:1–19 . doi: 10.3390/su8060502
- Kim TH, Tae SH, Suk SJ, et al (2016d) An optimization system for concrete life cycle cost and related CO<sub>2</sub> emissions. *Sustainability* 8:1–19 . doi: 10.3390/su8040361

- Kim YJ, van Leeuwen R, Cho BY, et al (2018) Evaluation of the efficiency of limestone powder in concrete and the effects on the environment. *Sustainability* 10:1–24 . doi: 10.3390/su10020550
- Kucukvar M, Egilmez G, Tatari O (2016) Life cycle assessment and optimization-based decision analysis of construction waste recycling for a LEED-certified university building. *Sustainability* 8:1–13 . doi: 10.3390/su8010089
- Lee S, Tae S, Roh S, Kim T (2015) Green template for life cycle assessment of buildings based on building information modeling: Focus on embodied environmental impact. *Sustainability* 7:16498–16512 . doi: 10.3390/su71215830
- Lenzo P, Traverso M, Salomone R, Ioppolo G (2017) Social life cycle assessment in the textile sector: An italian case study. *Sustainability* 9:1–21 . doi: 10.3390/su9112092
- Lewandowska A, Branowski B, Joachimiak-Lechman K, et al (2017) Sustainable design: A case of environmental and cost life cycle assessment of a kitchen designed for seniors and disabled people. *Sustainability* 9:1–20 . doi: 10.3390/su9081329
- Li J, Yang W, Wang Y, et al (2018) Carbon footprint and driving forces of saline agriculture in coastally reclaimed areas of Eastern China: A survey of four staple crops. *Sustainability* 10:1–16 . doi: 10.3390/su10040928
- Lim H, Tae S, Roh S (2018) Analysis of the Primary Building Materials in Support of G-SEED Life Cycle Assessment in South Korea. *Sustainability* 10:1–14 . doi: 10.3390/su10082820
- Lin HC, Fukushima Y (2016) Rice cultivation methods and their sustainability aspects: Organic and conventional rice production in industrialized tropical monsoon Asia with a dual cropping system. *Sustainability* 8:1–23 . doi: 10.3390/su8060529
- Lozanovski A, Whitehouse N, Ko N, Whitehouse S (2018) Sustainability assessment of fuel cell buses in public transport. *Sustainability* 10:1–15 . doi: 10.3390/su10051480
- Lu YT, Lee YM, Hong CY (2017) Inventory analysis and social life cycle assessment of greenhouse gas emissions from waste-to-energy incineration in Taiwan. *Sustainability* 9:1–18 . doi: 10.3390/su9111959
- Majeed A, Batool SA, Chaudhry MN (2018) Environmental quantification of the existing waste management system in a developing world municipality using EaseTech: The case of Bahawalpur, Pakistan. *Sustainability* 10:1–22 . doi: 10.3390/su10072424
- Malmgren L, Mjörnell K (2015) Application of a decision support tool in three renovation projects. *Sustainability* 7:12521–12538 . doi: 10.3390/su70912521
- Markussen M V., Kulak M, Smith LG, et al (2014) Evaluating the sustainability of a small-scale low-input organic vegetable supply system in the United Kingdom. *Sustainability* 6:1913–1945 . doi: 10.3390/su6041913
- Masuda K (2016) Optimization model for mitigating global warming at the farm scale: An application to Japanese rice farms. *Sustainability* 8:1–17 . doi: 10.3390/su8070593
- Matsuura E, Komatsuzaki M, Hashimi R (2018) Assessment of soil organic carbon storage in vegetable farms using different farming practices in the Kanto region of Japan. *Sustainability* 10:1–17 . doi: 10.3390/su10010152
- Meneses M, Concepción H, Vilanova R (2016) Joint environmental and economical analysis of wastewater treatment plants control strategies: A benchmark scenario analysis. *Sustainability* 8:1–20 . doi: 10.3390/su8040360
- Mondello G, Salomone R, Ioppolo G, et al (2017) Comparative LCA of alternative scenarios for waste treatment: The case of food waste production by the mass-retail sector. *Sustainability* 9:1–18 . doi: 10.3390/su9050827
- Moon D, Sagisaka M, Tahara K, Tsukahara K (2017) Progress towards sustainable production: Environmental, economic, and social assessments of the cellulose nanofiber production process. *Sustainability* 9:1–16 . doi: 10.3390/su9122368
- Moretti L, Mandrone V, D'Andrea A, Caro S (2017) Comparative “from cradle to gate” life cycle assessments of Hot Mix Asphalt (HMA) materials. *Sustainability* 9:1–16 . doi: 10.3390/su9030400

- Mouron P, Willersinn C, Möbius S, Lansche J (2016) Environmental profile of the swiss supply chain for French fries: Effects of food loss reduction, loss treatments and process modifications. *Sustainability* 8:1–20 . doi: 10.3390/su8121214
- Murphy F, McDonnell K (2017) A feasibility assessment of photovoltaic power systems in Ireland; a case study for the Dublin region. *Sustainability* 9:1–14 . doi: 10.3390/su9020302
- Nakatani J, Maruyama T, Fukuchi K, Moriguchi Y (2015) A practical approach to screening potential environmental hotspots of different impact categories in supply chains. *Sustainability* 7:11878–11892 . doi: 10.3390/su70911878
- Norris CB, Norris GA, Aulisio D (2014) Efficient assessment of social hotspots in the supply chains of 100 product categories using the social hotspots database. *Sustainability* 6:6973–6984 . doi: 10.3390/su6106973
- Özkan A, Günkaya Z, Tok G, et al (2016) Life cycle assessment and life cycle cost analysis of magnesia spinel brick production. *Sustainability* 8:1–13 . doi: 10.3390/su8070662
- Park J, Kim S, Suh K (2018) A comparative analysis of the environmental benefits of drone-based delivery services in urban and rural areas. *Sustainability* 10:1–15 . doi: 10.3390/su10030888
- Renzulli PA, Notarnicola B, Tassielli G, et al (2016) Life cycle assessment of steel produced in an Italian integrated steel mill. *Sustainability* 8:1–15 . doi: 10.3390/su8080719
- Repar N, Jan P, Nemecek T, et al (2018) Factors affecting global versus local environmental and economic performance of dairying: A case study of Swiss mountain farms. *Sustainability* 10:1–21 . doi: 10.3390/su10082940
- Repar N, Jan P, Nemecek T, et al (2016) Local versus global environmental performance of dairying and their link to economic performance: A case study of swiss mountain farms. *Sustainability* 8:1–19 . doi: 10.3390/su8121294
- Rinaldi S, Bonamente E, Scrucca F, et al (2016) Water and carbon footprint of wine: Methodology review and application to a case study. *Sustainability* 8:1–17 . doi: 10.3390/su8070621
- Rivero JCS, Eastmond-Spencer A, García JB, Navarro-Pineda FS (2016) A three-dimensional sustainability evaluation of jatropha plantations in Yucatan, Mexico. *Sustainability* 8:1–18 . doi: 10.3390/su8121316
- Roh S, Tae S (2016) Building simplified life cycle CO<sub>2</sub> emissions assessment tool (B-SCAT) to support low-carbon building design in South Korea. *Sustainability* 8:1–22 . doi: 10.3390/su8060567
- Roh S, Tae S, Kim R (2018a) Development of a streamlined Environmental Life Cycle Costing Model for buildings in South Korea. *Sustainability* 10:1–15 . doi: 10.3390/su10061733
- Roh S, Tae S, Kim R (2018b) Analysis of embodied environmental impacts of Korean apartment buildings considering major building materials. *Sustainability* 10:1–17 . doi: 10.3390/su10061693
- Santos S de F de OM, Piekarski CM, Ugaya CML, et al (2017) Life cycle analysis of charcoal production in masonry kilns with and without carbonization process generated gas combustion. *Sustainability* 9:1–20 . doi: 10.3390/su9091558
- Sanyé-Mengual E, Gasperi D, Michelon N, et al (2018) Eco-efficiency assessment and food security potential of home gardening: A case study in Padua, Italy. *Sustainability* 10:1–25 . doi: 10.3390/su10072124
- Seo Y, Ide K, Kitahata N, et al (2017) Environmental impact and nutritional improvement of elevated CO<sub>2</sub> treatment: A case study of spinach production. *Sustainability* 9:1–9 . doi: 10.3390/su9101854
- Simboli A, Raggi A, Rosica P (2015) Life cycle assessment of process eco-innovations in an SME automotive supply network. *Sustainability* 7:13761–13776 . doi: 10.3390/su71013761
- Syeda AB, Jadoon A, Chaudhry MN (2017) Life cycle assessment modelling of greenhouse gas emissions from existing and proposed municipal solid waste management system of Lahore, Pakistan. *Sustainability* 9:1–8 . doi: 10.3390/su9122242
- Tamburini E, Pedrini P, Marchetti MG, et al (2015) Life cycle based evaluation of environmental and economic impacts of agricultural productions in the Mediterranean area. *Sustainability* 7:2915–2935 . doi: 10.3390/su7032915
- Teah HY, Onuki M (2017) Support phosphorus recycling policy with social life cycle assessment: A case of Japan. *Sustainability* 9:1–16 . doi: 10.3390/su9071223

Walker S, Coleman N, Hodgson P, et al (2018) Evaluating the environmental dimension of material efficiency strategies relating to the circular economy. *Sustainability* 10:1–14 . doi: 10.3390/su10030666

Yan X, Jiang D, Fu J, Hao M (2018) Assessment of sweet sorghum-based ethanol potential in China within the Water-Energy-Food nexus framework. *Sustainability* 10:1–17 . doi: 10.3390/su10041046

### **3.2 Consequential life cycle assessment studies**

#### **3.2.1 Uncertainty analysis performed**

##### **3.2.1a Monte Carlo-like approaches**

None.

##### **3.2.1b Probabilistic (other than Monte Carlo)**

None.

##### **3.2.1c Taylor series**

None.

##### **3.2.1d Scenario analysis**

None.

##### **3.2.1e Qualitative/pedigree**

None.

##### **3.2.1f Sensitivity analysis**

None.

##### **3.2.1g Fuzzy logic**

None.

##### **3.2.1h Bayesian**

None.

##### **3.2.1i Regression**

None.

##### **3.2.1j Not indicated/other**

None.

#### **3.2.2 Uncertainty analysis reported as not performed**

None.

#### **3.2.3 Uncertainty mentioned but no analysis performed**

Afshari A, Nikolopoulou C, Martin M (2014) Life-cycle analysis of building retrofits at the urban scale—a case study in United Arab Emirates. *Sustainability* 6:453–473 . doi: 10.3390/su6010453

Deng Y, Tian Y (2015) Assessing the environmental impact of flax fibre reinforced polymer composite from a consequential life cycle assessment perspective. *Sustainability* 7:11462–11483 . doi: 10.3390/su70911462

Kayo C, Noda R (2018) Climate change mitigation potential of wood use in civil engineering in Japan based on life-cycle assessment. *Sustainability* 10:1–19 . doi: 10.3390/su10020561

Laine J, Ottelin J, Heinonen J, Junnila S (2017) Consequential implications of municipal energy system on city carbon footprints. *Sustainability* 9:1–14 . doi: 10.3390/su9101801

Mo W, Balen D, Moura M, Gardner KH (2018) A regional analysis of the life cycle environmental and economic tradeoffs of different economic growth paths. *Sustainability* 10:1–16 . doi: 10.3390/su10020542

### **3.2.4 No mention of uncertainty**

Wulf C, Kaltschmitt M (2018) Hydrogen supply chains for mobility-Environmental and economic assessment. Sustainability 10:1–26 . doi: 10.3390/su10061699

## **3.3 Combination attributional and consequential life cycle assessment studies**

### **3.3.1 Uncertainty analysis performed**

#### **3.3.1a Monte Carlo-like approaches**

None.

#### **3.3.1b Probabilistic (other than Monte Carlo)**

None.

#### **3.3.1c Taylor series**

None.

#### **3.3.1d Scenario analysis**

None.

#### **3.3.1e Qualitative/pedigree**

None.

#### **3.3.1f Sensitivity analysis**

None.

#### **3.3.1g Fuzzy logic**

None.

#### **3.3.1h Bayesian**

None.

#### **3.3.1i Regression**

None.

#### **3.3.1j Not indicated/other**

None.

### **3.3.2 Uncertainty analysis reported as not performed**

None.

### **3.3.3 Uncertainty mentioned but no analysis performed**

Accorsi R, Versari L, Manzini R (2015) Glass vs. plastic: Life cycle assessment of extra-virgin olive oil bottles across global supply chains. Sustainability 7:2818–2840 . doi: 10.3390/su7032818

### **3.3.4 No mention of uncertainty**

None.

## **4. Applied Energy**

### **4.1 Attributional life cycle assessment studies**

#### **4.1.1 Uncertainty analysis performed**

##### **4.1.1a Monte Carlo-like approaches**

- Baral NR, Quiroz-Arita C, Bradley TH (2017) Uncertainties in corn stover feedstock supply logistics cost and life-cycle greenhouse gas emissions for butanol production. *Appl Energy* 208:1343–1356 . doi: 10.1016/j.apenergy.2017.09.020
- Bonou A, Laurent A, Olsen SI (2016) Life cycle assessment of onshore and offshore wind energy-from theory to application. *Appl Energy* 180:327–337 . doi: 10.1016/j.apenergy.2016.07.058
- Boschiero M, Kelderer M, Schmitt AO, et al (2015) Influence of agricultural residues interpretation and allocation procedures on the environmental performance of bioelectricity production - A case study on woodchips from apple orchards. *Appl Energy* 147:235–245 . doi: 10.1016/j.apenergy.2015.01.109
- Di Lullo G, Zhang H, Kumar A (2016) Evaluation of uncertainty in the well-to-tank and combustion greenhouse gas emissions of various transportation fuels. *Appl Energy* 184:413–426 . doi: 10.1016/j.apenergy.2016.10.027
- Fortier MOP, Roberts GW, Stagg-Williams SM, Sturm BSM (2014) Life cycle assessment of bio-jet fuel from hydrothermal liquefaction of microalgae. *Appl Energy* 122:73–82 . doi: 10.1016/j.apenergy.2014.01.077
- Lau ET, Yang Q, Stokes L, et al (2015) Carbon savings in the UK demand side response programmes. *Appl Energy* 159:478–489 . doi: 10.1016/j.apenergy.2015.08.123
- Nease J, Adams TA (2015) Comparative life cycle analyses of bulk-scale coal-fueled solid oxide fuel cell power plants. *Appl Energy* 150:161–175 . doi: 10.1016/j.apenergy.2015.03.105
- Ravi S, Macknick J, Lobell D, et al (2016) Colocation opportunities for large solar infrastructures and agriculture in drylands. *Appl Energy* 165:383–392 . doi: 10.1016/j.apenergy.2015.12.078
- Rugani B, Golkowska K, Vázquez-Rowe I, et al (2015) Simulation of environmental impact scores within the life cycle of mixed wood chips from alternative short rotation coppice systems in Flanders (Belgium). *Appl Energy* 156:449–464 . doi: 10.1016/j.apenergy.2015.07.032
- Sadhukhan J (2014) Distributed and micro-generation from biogas and agricultural application of sewage sludge: Comparative environmental performance analysis using life cycle approaches. *Appl Energy* 122:196–206 . doi: 10.1016/j.apenergy.2014.01.051
- Samsatli S, Samsatli NJ, Shah N (2015) BVCM: A comprehensive and flexible toolkit for whole system biomass value chain analysis and optimisation - Mathematical formulation. *Appl Energy* 147:131–160 . doi: 10.1016/j.apenergy.2015.01.078
- Santagata R, Ripa M, Ulgiati S (2017) An environmental assessment of electricity production from slaughterhouse residues. Linking urban, industrial and waste management systems. *Appl Energy* 186:175–188 . doi: 10.1016/j.apenergy.2016.07.073
- Sapkota K, Oni AO, Kumar A, Linwei M (2018) The development of a techno-economic model for the extraction, transportation, upgrading, and shipping of Canadian oil sands products to the Asia-Pacific region. *Appl Energy* 223:273–292 . doi: 10.1016/j.apenergy.2018.04.047
- Sastre CM, González-Arechavala Y, Santos AM (2015) Global warming and energy yield evaluation of Spanish wheat straw electricity generation - A LCA that takes into account parameter uncertainty and variability. *Appl Energy* 154:900–911 . doi: 10.1016/j.apenergy.2015.05.108
- Tran TTD, Smith AD (2018) Incorporating performance-based global sensitivity and uncertainty analysis into LCOE calculations for emerging renewable energy technologies. *Appl Energy* 216:157–171 . doi: 10.1016/j.apenergy.2018.02.024
- Tu Q, Eckelman M, Zimmerman JB (2018) Harmonized algal biofuel life cycle assessment studies enable direct process train comparison. *Appl Energy* 224:494–509 . doi: 10.1016/j.apenergy.2018.04.066
- Usack JG, Gerber Van Doren L, Posmanik R, et al (2018) An evaluation of anaerobic co-digestion implementation on New York State dairy farms using an environmental and economic life-cycle framework. *Appl Energy* 211:28–40 . doi: 10.1016/j.apenergy.2017.11.032
- Wang C, Zheng X, Cai W, et al (2017) Unexpected water impacts of energy-saving measures in the iron and steel sector: Tradeoffs or synergies? *Appl Energy* 205:1119–1127 . doi: 10.1016/j.apenergy.2017.08.125
- Weiser C, Zeller V, Reinicke F, et al (2014) Integrated assessment of sustainable cereal straw potential and different straw-based energy applications in Germany. *Appl Energy* 114:749–762 . doi: 10.1016/j.apenergy.2013.07.016

- Whittaker C, Borrion AL, Newnes L, McManus M (2014) The renewable energy directive and cereal residues. *Appl Energy* 122:207–215 . doi: 10.1016/j.apenergy.2014.01.091
- You S, Tong H, Armin-Hoiland J, et al (2017) Techno-economic and greenhouse gas savings assessment of decentralized biomass gasification for electrifying the rural areas of Indonesia. *Appl Energy* 208:495–510 . doi: 10.1016/j.apenergy.2017.10.001
- Zhai P, Isaacs JA, Eckelman MJ (2016) Net energy benefits of carbon nanotube applications. *Appl Energy* 173:624–634 . doi: 10.1016/j.apenergy.2016.04.001
- Zhao Y, Noori M, Tatari O (2016) Vehicle to Grid regulation services of electric delivery trucks: Economic and environmental benefit analysis. *Appl Energy* 170:161–175 . doi: 10.1016/j.apenergy.2016.02.097

#### **4.1.1b Probabilistic (other than Monte Carlo)**

- Atmaca A, Atmaca N (2016) Comparative life cycle energy and cost analysis of post-disaster temporary housings. *Appl Energy* 171:429–443 . doi: 10.1016/j.apenergy.2016.03.058
- Di Maria F, Micale C, Contini S (2016) Energetic and environmental sustainability of the co-digestion of sludge with bio-waste in a life cycle perspective. *Appl Energy* 171:67–76 . doi: 10.1016/j.apenergy.2016.03.036
- Lee SY, Lee JU, Lee IB, Han J (2017) Design under uncertainty of carbon capture and storage infrastructure considering cost, environmental impact, and preference on risk. *Appl Energy* 189:725–738 . doi: 10.1016/j.apenergy.2016.12.066
- Mirkouei A, Haapala KR, Sessions J, Murthy GS (2017) A mixed biomass-based energy supply chain for enhancing economic and environmental sustainability benefits: A multi-criteria decision making framework. *Appl Energy* 206:1088–1101 . doi: 10.1016/j.apenergy.2017.09.001
- Wolfram P, Wiedmann T (2017) Electrifying Australian transport: Hybrid life cycle analysis of a transition to electric light-duty vehicles and renewable electricity. *Appl Energy* 206:531–540 . doi: 10.1016/j.apenergy.2017.08.219

#### **4.1.1c Taylor series**

None.

#### **4.1.1d Scenario analysis**

- Ling-Chin J, Roskilly AP (2016) Investigating the implications of a new-build hybrid power system for Roll-on/Roll-off cargo ships from a sustainability perspective – A life cycle assessment case study. *Appl Energy* 181:416–434 . doi: 10.1016/j.apenergy.2016.08.065
- Meinrenken CJ, Lackner KS (2015) Fleet view of electrified transportation reveals smaller potential to reduce GHG emissions. *Appl Energy* 138:393–403 . doi: 10.1016/j.apenergy.2014.10.082
- Noori M, Zhao Y, Onat NC, et al (2016) Light-duty electric vehicles to improve the integrity of the electricity grid through Vehicle-to-Grid technology: Analysis of regional net revenue and emissions savings. *Appl Energy* 168:146–158 . doi: 10.1016/j.apenergy.2016.01.030

#### **4.1.1e Qualitative/pedigree**

None.

#### **4.1.1f Sensitivity analysis**

- Azadi P, Brownbridge G, Mosbach S, et al (2014) The carbon footprint and non-renewable energy demand of algae-derived biodiesel. *Appl Energy* 113:1632–1644 . doi: 10.1016/j.apenergy.2013.09.027
- Cox BL, Mutel CL (2018) The environmental and cost performance of current and future motorcycles. *Appl Energy* 212:1013–1024 . doi: 10.1016/j.apenergy.2017.12.100
- Hao H, Liu F, Liu Z, Zhao F (2016) Compression ignition of low-octane gasoline: Life cycle energy consumption and greenhouse gas emissions. *Appl Energy* 181:391–398 . doi: 10.1016/j.apenergy.2016.08.100
- Morganti K, Al-Abdullah M, Alzubail A, et al (2017) Synergistic engine-fuel technologies for light-duty vehicles: Fuel economy and Greenhouse Gas Emissions. *Appl Energy* 208:1538–1561 . doi: 10.1016/j.apenergy.2017.08.213

Soam S, Kapoor M, Kumar R, et al (2016) Global warming potential and energy analysis of second generation ethanol production from rice straw in India. *Appl Energy* 184:353–364 . doi: 10.1016/j.apenergy.2016.10.034

Wang Y, Yang X, Sun M, et al (2016) Estimating carbon emissions from the pulp and paper industry: A case study. *Appl Energy* 184:779–789 . doi: 10.1016/j.apenergy.2016.05.026

#### **4.1.1g Fuzzy logic**

None.

#### **4.1.1h Bayesian**

None.

#### **4.1.1i Regression**

None.

#### **4.1.1j Not indicated/other**

Chen T, Shen D, Jin Y, et al (2017) Comprehensive evaluation of environ-economic benefits of anaerobic digestion technology in an integrated food waste-based methane plant using a fuzzy mathematical model. *Appl Energy* 208:666–677 . doi: 10.1016/j.apenergy.2017.09.082

Yang J, Chen B (2014) Global warming impact assessment of a crop residue gasification project-A dynamic LCA perspective. *Appl Energy* 122:269–279 . doi: 10.1016/j.apenergy.2014.02.034

Zhang S, Worrell E, Crijns-Graus W, et al (2016) Modeling energy efficiency to improve air quality and health effects of China's cement industry. *Appl Energy* 184:574–593 . doi: 10.1016/j.apenergy.2016.10.030

#### **4.1.2 Uncertainty analysis reported as not performed**

Ahn YC, Lee IB, Lee KH, Han JH (2015) Strategic planning design of microalgae biomass-to-biodiesel supply chain network: Multi-period deterministic model. *Appl Energy* 154:528–542 . doi: 10.1016/j.apenergy.2015.05.047

Jin Y, Chen T, Chen X, Yu Z (2015) Life-cycle assessment of energy consumption and environmental impact of an integrated food waste-based biogas plant. *Appl Energy* 151:227–236 . doi: 10.1016/j.apenergy.2015.04.058

Wang Z, Li Z, Lei T, et al (2016) Life cycle assessment of energy consumption and environmental emissions for cornstalk-based ethyl levulinate. *Appl Energy* 183:170–181 . doi: 10.1016/j.apenergy.2016.08.187

Wu J, Pu G, Guo Y, et al (2018) Retrospective and prospective assessment of exergy, life cycle carbon emissions, and water footprint for coking network evolution in China. *Appl Energy* 218:479–493 . doi: 10.1016/j.apenergy.2018.03.003

Wu W, Wang PH, Lee DJ, Chang JS (2017) Global optimization of microalgae-to-biodiesel chains with integrated cogasification combined cycle systems based on greenhouse gas emissions reductions. *Appl Energy* 197:63–82 . doi: 10.1016/j.apenergy.2017.03.117

#### **4.1.3 Uncertainty mentioned but no analysis performed**

Abu-Ghosh S, Fixler D, Dubinsky Z, Iluz D (2015) Energy-input analysis of the life-cycle of microalgal cultivation systems and best scenario for oil-rich biomass production. *Appl Energy* 154:1082–1088 . doi: 10.1016/j.apenergy.2015.02.086

Adams PWR, Shirley JEJ, McManus MC (2015) Comparative cradle-to-gate life cycle assessment of wood pellet production with torrefaction. *Appl Energy* 138:367–380 . doi: 10.1016/j.apenergy.2014.11.002

Agostini A, Belmonte N, Masala A, et al (2018) Role of hydrogen tanks in the life cycle assessment of fuel cell-based auxiliary power units. *Appl Energy* 215:1–12 . doi: 10.1016/j.apenergy.2018.01.095

Alejos Altamirano CA, Yokoyama L, de Medeiros JL, de Queiroz Fernandes Araújo O (2016) Ethylic or methylic route to soybean biodiesel? Tracking environmental answers through life cycle assessment. *Appl Energy* 184:1246–1263 . doi: 10.1016/j.apenergy.2016.05.017



- Alvarez S, Sosab M, Rubioa A (2015) Product and corporate carbon footprint using the compound method based on financial accounts. The case of Osorio wind farms. *Appl Energy* 139:196–204 . doi: 10.1016/j.apenergy.2014.11.039
- Arbabzadeh M, Johnson JX, De Kleine R, Keoleian GA (2015) Vanadium redox flow batteries to reach greenhouse gas emissions targets in an off-grid configuration. *Appl Energy* 146:397–408 . doi: 10.1016/j.apenergy.2015.02.005
- Arent D, Pless J, Mai T, et al (2014) Implications of high renewable electricity penetration in the U.S. for water use, greenhouse gas emissions, land-use, and materials supply. *Appl Energy* 123:368–377 . doi: 10.1016/j.apenergy.2013.12.022
- Arvesen A, Hauan IB, Bolsøy BM, Hertwich EG (2015) Life cycle assessment of transport of electricity via different voltage levels: A case study for Nord-Trøndelag county in Norway. *Appl Energy* 157:144–151 . doi: 10.1016/j.apenergy.2015.08.013
- Ayodele TR, Ogunjuyigbe ASO, Alao MA (2017) Life cycle assessment of waste-to-energy (WtE) technologies for electricity generation using municipal solid waste in Nigeria. *Appl Energy* 201:200–218 . doi: 10.1016/j.apenergy.2017.05.097
- Barteczko-Hibbert C, Bonis I, Binns M, et al (2014) A multi-period mixed-integer linear optimisation of future electricity supply considering life cycle costs and environmental impacts. *Appl Energy* 133:317–334 . doi: 10.1016/j.apenergy.2014.07.066
- Bauer C, Hofer J, Althaus HJ, et al (2015) The environmental performance of current and future passenger vehicles: Life Cycle Assessment based on a novel scenario analysis framework. *Appl Energy* 157:871–883 . doi: 10.1016/j.apenergy.2015.01.019
- Björnebo L, Spatari S, Gurian PL (2018) A greenhouse gas abatement framework for investment in district heating. *Appl Energy* 211:1095–1105 . doi: 10.1016/j.apenergy.2017.12.003
- Budzianowski WM, Postawa K (2016) Total Chain Integration of sustainable biorefinery systems. *Appl Energy* 184:1432–1446 . doi: 10.1016/j.apenergy.2016.06.050
- Casas-Ledon Y, Arteaga-Perez LE, Dewulf J, et al (2014) Health external costs associated to the integration of solid oxide fuel cell in a sugar-ethanol factory. *Appl Energy* 113:1283–1292 . doi: 10.1016/j.apenergy.2013.08.090
- Collet P, Flottes E, Favre A, et al (2017) Techno-economic and Life Cycle Assessment of methane production via biogas upgrading and power to gas technology. *Appl Energy* 192:282–295 . doi: 10.1016/j.apenergy.2016.08.181
- Dias GM, Ayer NW, Kariyapperuma K, et al (2017) Life cycle assessment of thermal energy production from short-rotation willow biomass in Southern Ontario, Canada. *Appl Energy* 204:343–352 . doi: 10.1016/j.apenergy.2017.07.051
- Ebner J, Babbitt C, Winer M, et al (2014) Life cycle greenhouse gas (GHG) impacts of a novel process for converting food waste to ethanol and co-products. *Appl Energy* 130:86–93 . doi: 10.1016/j.apenergy.2014.04.099
- Falke T, Krengel S, Meinerzhagen AK, Schnettler A (2016) Multi-objective optimization and simulation model for the design of distributed energy systems. *Appl Energy* 184:1508–1516 . doi: 10.1016/j.apenergy.2016.03.044
- Gangolells M, Casals M, Forcada N, et al (2015) Environmental impacts related to the commissioning and usage phase of an intelligent energy management system. *Appl Energy* 138:216–223 . doi: 10.1016/j.apenergy.2014.10.070
- Goe M, Gaustad G (2014) Strengthening the case for recycling photovoltaics: An energy payback analysis. *Appl Energy* 120:41–48 . doi: 10.1016/j.apenergy.2014.01.036
- Haro P, Aracil C, Vidal-Barrero F, Ollero P (2015) Balance and saving of GHG emissions in thermochemical biorefineries. *Appl Energy* 147:444–455 . doi: 10.1016/j.apenergy.2015.02.083
- Hong S, Bradshaw CJA, Brook BW (2014) Nuclear power can reduce emissions and maintain a strong economy: Rating Australia's optimal future electricity-generation mix by technologies and policies. *Appl Energy* 136:712–725 . doi: 10.1016/j.apenergy.2014.09.062

- Ingrao C, Rana R, Tricase C, Lombardi M (2015) Application of Carbon Footprint to an agro-biogas supply chain in Southern Italy. *Appl Energy* 149:75–88 . doi: 10.1016/j.apenergy.2015.03.111
- Ji S, Chen B (2016) Carbon footprint accounting of a typical wind farm in China. *Appl Energy* 180:416–423 . doi: 10.1016/j.apenergy.2016.07.114
- Ke W, Zhang S, He X, et al (2017) Well-to-wheels energy consumption and emissions of electric vehicles: Mid-term implications from real-world features and air pollution control progress. *Appl Energy* 188:367–377 . doi: 10.1016/j.apenergy.2016.12.011
- Khatiwada D, Venkata BK, Silveira S, Johnson FX (2016) Energy and GHG balances of ethanol production from cane molasses in Indonesia. *Appl Energy* 164:756–768 . doi: 10.1016/j.apenergy.2015.11.032
- Kucukvar M, Cansev B, Egilmez G, et al (2016) Energy-climate-manufacturing nexus: New insights from the regional and global supply chains of manufacturing industries. *Appl Energy* 184:889–904 . doi: 10.1016/j.apenergy.2016.03.068
- Liu J, Sun X, Lu B, et al (2016) The life cycle rebound effect of air-conditioner consumption in China. *Appl Energy* 184:1026–1032 . doi: 10.1016/j.apenergy.2015.11.100
- Malça J, Coelho A, Freire F (2014) Environmental life-cycle assessment of rapeseed-based biodiesel: Alternative cultivation systems and locations. *Appl Energy* 114:837–844 . doi: 10.1016/j.apenergy.2013.06.048
- McKechnie J, Saville B, MacLean HL (2016) Steam-treated wood pellets: Environmental and financial implications relative to fossil fuels and conventional pellets for electricity generation. *Appl Energy* 180:637–649 . doi: 10.1016/j.apenergy.2016.08.024
- Miró L, Oró E, Boer D, Cabeza LF (2015) Embodied energy in thermal energy storage (TES) systems for high temperature applications. *Appl Energy* 137:793–799 . doi: 10.1016/j.apenergy.2014.06.062
- Moreau V, Vuille F (2018) Decoupling energy use and economic growth: Counter evidence from structural effects and embodied energy in trade. *Appl Energy* 215:54–62 . doi: 10.1016/j.apenergy.2018.01.044
- Moretti C, Moro A, Edwards R, et al (2017) Analysis of standard and innovative methods for allocating upstream and refinery GHG emissions to oil products. *Appl Energy* 206:372–381 . doi: 10.1016/j.apenergy.2017.08.183
- Nguyen T Van, Tock L, Breuhaus P, et al (2016) CO<sub>2</sub>-mitigation options for the offshore oil and gas sector. *Appl Energy* 161:673–694 . doi: 10.1016/j.apenergy.2015.09.088
- Nguyen T Van, Tock L, Breuhaus P, et al (2014) Oil and gas platforms with steam bottoming cycles: System integration and thermoenviromonic evaluation. *Appl Energy* 131:222–237 . doi: 10.1016/j.apenergy.2014.06.034
- Onat NC, Kucukvar M, Tatari O (2015) Conventional, hybrid, plug-in hybrid or electric vehicles? State-based comparative carbon and energy footprint analysis in the United States. *Appl Energy* 150:36–49 . doi: 10.1016/j.apenergy.2015.04.001
- Parra D, Zhang X, Bauer C, Patel MK (2017) An integrated techno-economic and life cycle environmental assessment of power-to-gas systems. *Appl Energy* 193:440–454 . doi: 10.1016/j.apenergy.2017.02.063
- Pérez-Fortes M, Schöneberger JC, Boulamanti A, Tzimas E (2016) Methanol synthesis using captured CO<sub>2</sub> as raw material: Techno-economic and environmental assessment. *Appl Energy* 161:718–732 . doi: 10.1016/j.apenergy.2015.07.067
- Pierie F, Bekkering J, Benders RMJ, et al (2016) A new approach for measuring the environmental sustainability of renewable energy production systems: Focused on the modelling of green gas production pathways. *Appl Energy* 162:131–138 . doi: 10.1016/j.apenergy.2015.10.037
- Proietti S, Sdringola P, Desideri U, et al (2014) Carbon footprint of an olive tree grove. *Appl Energy* 127:115–124 . doi: 10.1016/j.apenergy.2014.04.019
- Qiao Q, Zhao F, Liu Z, et al (2017) Cradle-to-gate greenhouse gas emissions of battery electric and internal combustion engine vehicles in China. *Appl Energy* 204:1399–1411 . doi: 10.1016/j.apenergy.2017.05.041
- Reyes Valle C, Villanueva Perales AL, Vidal-Barrero F, Ollero P (2015) Integrated economic and life cycle assessment of thermochemical production of bioethanol to reduce production cost by exploiting excess of greenhouse gas savings. *Appl Energy* 148:466–475 . doi: 10.1016/j.apenergy.2015.03.113

- Rocco M V., Colombo E (2016) Internalization of human labor in embodied energy analysis: Definition and application of a novel approach based on Environmentally extended Input-Output analysis. *Appl Energy* 182:590–601 . doi: 10.1016/j.apenergy.2016.08.148
- Rocco M V., Colombo E, Sciubba E (2014) Advances in exergy analysis: A novel assessment of the Extended Exergy Accounting method. *Appl Energy* 113:1405–1420 . doi: 10.1016/j.apenergy.2013.08.080
- Rocco M V., Di Lucchio A, Colombo E (2017) Exergy Life Cycle Assessment of electricity production from Waste-to-Energy technology: A Hybrid Input-Output approach. *Appl Energy* 194:832–844 . doi: 10.1016/j.apenergy.2016.11.059
- Rolfe A, Huang Y, Haaf M, et al (2018) Integration of the calcium carbonate looping process into an existing pulverized coal-fired power plant for CO<sub>2</sub> capture: Techno-economic and environmental evaluation. *Appl Energy* 222:169–179 . doi: 10.1016/j.apenergy.2018.03.160
- Savino MM, Manzini R, Della Selva V, Accorsi R (2017) A new model for environmental and economic evaluation of renewable energy systems: The case of wind turbines. *Appl Energy* 189:739–752 . doi: 10.1016/j.apenergy.2016.11.124
- Schakel W, Hung CR, Tokheim LA, et al (2018) Impact of fuel selection on the environmental performance of post-combustion calcium looping applied to a cement plant. *Appl Energy* 210:75–87 . doi: 10.1016/j.apenergy.2017.10.123
- Schakel W, Meerman H, Talaei A, et al (2014) Comparative life cycle assessment of biomass co-firing plants with carbon capture and storage. *Appl Energy* 131:441–467 . doi: 10.1016/j.apenergy.2014.06.045
- Shemfe MB, Whittaker C, Gu S, Fidalgo B (2016) Comparative evaluation of GHG emissions from the use of Miscanthus for bio-hydrocarbon production via fast pyrolysis and bio-oil upgrading. *Appl Energy* 176:22–33 . doi: 10.1016/j.apenergy.2016.04.113
- Shih YH, Tseng CH (2014) Cost-benefit analysis of sustainable energy development using life-cycle co-benefits assessment and the system dynamics approach. *Appl Energy* 119:57–66 . doi: 10.1016/j.apenergy.2013.12.031
- Silalertruksa T, Gheewala SH, Pongpat P (2015) Sustainability assessment of sugarcane biorefinery and molasses ethanol production in Thailand using eco-efficiency indicator. *Appl Energy* 160:603–609 . doi: 10.1016/j.apenergy.2015.08.087
- Simons A, Bauer C (2015) A life-cycle perspective on automotive fuel cells. *Appl Energy* 157:884–896 . doi: 10.1016/j.apenergy.2015.02.049
- Stamford L, Azapagic A (2014) Life cycle environmental impacts of UK shale gas. *Appl Energy* 134:506–518 . doi: 10.1016/j.apenergy.2014.08.063
- Su B, Ang BW (2015) Multiplicative decomposition of aggregate carbon intensity change using input-output analysis. *Appl Energy* 154:13–20 . doi: 10.1016/j.apenergy.2015.04.101
- Turconi R, O'Dwyer C, Flynn D, Astrup T (2014a) Emissions from cycling of thermal power plants in electricity systems with high penetration of wind power: Life cycle assessment for Ireland. *Appl Energy* 131:1–8 . doi: 10.1016/j.apenergy.2014.06.006
- Turconi R, Tonini D, Nielsen CFB, et al (2014b) Environmental impacts of future low-carbon electricity systems: Detailed life cycle assessment of a Danish case study. *Appl Energy* 132:66–73 . doi: 10.1016/j.apenergy.2014.06.078
- Vasan A, Sood B, Pecht M (2014) Carbon footprinting of electronic products. *Appl Energy* 136:636–648 . doi: 10.1016/j.apenergy.2014.09.074
- Vázquez-Rowe I, Reyna JL, García-Torres S, Kahhat R (2015) Is climate change-centrism an optimal policy making strategy to set national electricity mixes? *Appl Energy* 159:108–116 . doi: 10.1016/j.apenergy.2015.08.121
- Viebahn P, Vallentin D, Höller S (2015) Prospects of carbon capture and storage (CCS) in China's power sector - An integrated assessment. *Appl Energy* 157:229–244 . doi: 10.1016/j.apenergy.2015.07.023
- Viebahn P, Vallentin D, Höller S (2014) Prospects of carbon capture and storage (CCS) in India's power sector - An integrated assessment. *Appl Energy* 157:229–244 . doi: 10.1016/j.apenergy.2015.07.023

- Wan L, Wang C, Cai W (2016) Impacts on water consumption of power sector in major emitting economies under INDC and longer term mitigation scenarios: An input-output based hybrid approach. *Appl Energy* 184:26–39 . doi: 10.1016/j.apenergy.2016.10.013
- Wang Z, Lei T, Yang M, et al (2017) Life cycle environmental impacts of cornstalk briquette fuel in China. *Appl Energy* 192:83–94 . doi: 10.1016/j.apenergy.2017.01.071
- Weldu YW, Assefa G, Jolliet O (2017) Life cycle human health and ecotoxicological impacts assessment of electricity production from wood biomass compared to coal fuel. *Appl Energy* 187:564–574 . doi: 10.1016/j.apenergy.2016.11.101
- White DJ, Hubacek K, Feng K, et al (2018) The Water-Energy-Food Nexus in East Asia: A tele-connected value chain analysis using inter-regional input-output analysis. *Appl Energy* 210:550–567 . doi: 10.1016/j.apenergy.2017.05.159
- Xu Y, Gbologah FE, Lee DY, et al (2015) Assessment of alternative fuel and powertrain transit bus options using real-world operations data: Life-cycle fuel and emissions modeling. *Appl Energy* 154:143–159 . doi: 10.1016/j.apenergy.2015.04.112
- Yan C, Shi W, Li X, Zhao Y (2016) Optimal design and application of a compound cold storage system combining seasonal ice storage and chilled water storage. *Appl Energy* 171:1–11 . doi: 10.1016/j.apenergy.2016.03.005
- Yang J, Chen B (2016) Emergy-based sustainability evaluation of wind power generation systems. *Appl Energy* 177:239–246 . doi: 10.1016/j.apenergy.2016.05.126
- Yang X, Li H, Wallin F, et al (2017) Impacts of emission reduction and external cost on natural gas distribution. *Appl Energy* 207:553–561 . doi: 10.1016/j.apenergy.2017.06.005
- Yoshikawa N, Fujiwara N, Nagata J, Amano K (2016) Greenhouse gases reduction potential through consumer's behavioral changes in terms of food-related product selection. *Appl Energy* 162:1564–1570 . doi: 10.1016/j.apenergy.2015.06.057
- Yu Z, Ma W, Xie K, et al (2017) Life cycle assessment of grid-connected power generation from metallurgical route multi-crystalline silicon photovoltaic system in China. *Appl Energy* 185:68–81 . doi: 10.1016/j.apenergy.2016.10.051
- Zhang X, Bauer C, Mutel CL, Volkart K (2017) Life Cycle Assessment of Power-to-Gas: Approaches, system variations and their environmental implications. *Appl Energy* 190:326–338 . doi: 10.1016/j.apenergy.2016.12.098

#### **4.1.4 No mention of uncertainty**

- Alamia A, Magnusson I, Johnsson F, Thunman H (2016) Well-to-wheel analysis of bio-methane via gasification, in heavy duty engines within the transport sector of the European Union. *Appl Energy* 170:445–454 . doi: 10.1016/j.apenergy.2016.02.001
- Arodudu OT, Helming K, Voinov A, Wiggering H (2017) Integrating agronomic factors into energy efficiency assessment of agro-bioenergy production – A case study of ethanol and biogas production from maize feedstock. *Appl Energy* 198:426–439 . doi: 10.1016/j.apenergy.2017.02.017
- Balcombe P, Rigby D, Azapagic A (2015) Environmental impacts of microgeneration: Integrating solar PV, Stirling engine CHP and battery storage. *Appl Energy* 139:245–259 . doi: 10.1016/j.apenergy.2014.11.034
- Belmonte N, Staulo S, Fiorot S, et al (2018) Fuel cell powered octocopter for inspection of mobile cranes: Design, cost analysis and environmental impacts. *Appl Energy* 215:556–565 . doi: 10.1016/j.apenergy.2018.02.072
- Bennion EP, Ginosar DM, Moses J, et al (2015) Lifecycle assessment of microalgae to biofuel: Comparison of thermochemical processing pathways. *Appl Energy* 154:1062–1071 . doi: 10.1016/j.apenergy.2014.12.009
- Bergesen JD, Suh S (2016) A framework for technological learning in the supply chain: A case study on CdTe photovoltaics. *Appl Energy* 169:721–728 . doi: 10.1016/j.apenergy.2016.02.013
- Bi Z, Song L, De Kleine R, et al (2015) Plug-in vs. wireless charging: Life cycle energy and greenhouse gas emissions for an electric bus system. *Appl Energy* 146:11–19 . doi: 10.1097/FTD.0000000000000152

- Burkhardt J, Patyk A, Tanguy P, Retzke C (2016) Hydrogen mobility from wind energy – A life cycle assessment focusing on the fuel supply. *Appl Energy* 181:54–64 . doi: 10.1016/j.apenergy.2016.07.104
- Carlsson B, Persson H, Meir M, Rekstad J (2014) A total cost perspective on use of polymeric materials in solar collectors - Importance of environmental performance on suitability. *Appl Energy* 125:10–20 . doi: 10.1016/j.apenergy.2014.03.027
- Chau CK, Xu JM, Leung TM, Ng WY (2017) Evaluation of the impacts of end-of-life management strategies for deconstruction of a high-rise concrete framed office building. *Appl Energy* 185:1595–1603 . doi: 10.1016/j.apenergy.2016.01.019
- Chowdhury R, Freire F (2015) Bioenergy production from algae using dairy manure as a nutrient source: Life cycle energy and greenhouse gas emission analysis. *Appl Energy* 154:1112–1121 . doi: 10.1016/j.apenergy.2015.05.045
- Colclough S, McGrath T (2015) Net energy analysis of a solar combi system with Seasonal Thermal Energy Store. *Appl Energy* 147:611–616 . doi: 10.1016/j.apenergy.2015.02.088
- Comodi G, Bevilacqua M, Caresana F, et al (2016) Life cycle assessment and energy-CO<sub>2</sub>-economic payback analyses of renewable domestic hot water systems with unglazed and glazed solar thermal panels. *Appl Energy* 164:944–955 . doi: 10.1016/j.apenergy.2015.08.036
- Czyrnek-Delêtre MM, Rocca S, Agostini A, et al (2017) Life cycle assessment of seaweed biomethane, generated from seaweed sourced from integrated multi-trophic aquaculture in temperate oceanic climates. *Appl Energy* 196:34–50 . doi: 10.1016/j.apenergy.2017.03.129
- da Fonseca MB, Poganietz WR, Gehrmann HJ (2014) Environmental and economic analysis of SolComBio concept for sustainable energy supply in remote regions. *Appl Energy* 135:666–674 . doi: 10.1016/j.apenergy.2014.07.057
- Daniels L, Coker P, Potter B (2016) Embodied carbon dioxide of network assets in a decarbonised electricity grid. *Appl Energy* 180:142–154 . doi: 10.1016/j.apenergy.2016.07.044
- Dimitrova Z, Maréchal F (2016) Techno-economic design of hybrid electric vehicles and possibilities of the multi-objective optimization structure. *Appl Energy* 161:746–759 . doi: 10.1016/j.apenergy.2015.09.071
- Dong J, Chi Y, Zou D, et al (2014) Energy–environment–economy assessment of waste management systems from a life cycle perspective: Model development and case study. *Appl Energy* 11469:400–408 . doi: 10.1016/j.apenergy.2013.09.037
- Ericsson N, Nordberg Å, Sundberg C, et al (2014) Climate impact and energy efficiency from electricity generation through anaerobic digestion or direct combustion of short rotation coppice willow. *Appl Energy* 132:86–98 . doi: 10.1016/j.apenergy.2014.06.049
- Fan J, Hong H, Zhu L, et al (2017) Thermodynamic and environmental evaluation of biomass and coal co-fuelled gasification chemical looping combustion with CO<sub>2</sub> capture for combined cooling, heating and power production. *Appl Energy* 195:861–876 . doi: 10.1016/j.apenergy.2017.03.093
- Friesenhan C, Agirre I, Eltrop L, Arias PL (2017) Streamlined life cycle analysis for assessing energy and exergy performance as well as impact on the climate for landfill gas utilization technologies. *Appl Energy* 185:805–813 . doi: 10.1016/j.apenergy.2016.10.097
- García-Gusano D, Iribarren D, Garraín D (2017) Prospective analysis of energy security: A practical life-cycle approach focused on renewable power generation and oriented towards policy-makers. *Appl Energy* 190:891–901 . doi: 10.1016/j.apenergy.2017.01.011
- Garcia R, Marques P, Freire F (2014) Life-cycle assessment of electricity in Portugal. *Appl Energy* 134:563–572 . doi: 10.1016/j.apenergy.2014.08.067
- Ghaffour N, Lattemann S, Missimer T, et al (2014) Renewable energy-driven innovative energy-efficient desalination technologies. *Appl Energy* 136:1155–1165 . doi: 10.1016/j.apenergy.2014.03.033
- Gnansounou E, Kenthorai Raman J (2016) Life cycle assessment of algae biodiesel and its co-products. *Appl Energy* 161:300–308 . doi: 10.1016/j.apenergy.2015.10.043
- Hakawati R, Smyth BM, McCullough G, et al (2017) What is the most energy efficient route for biogas utilization: Heat, electricity or transport? *Appl Energy* 206:1076–1087 . doi: 10.1016/j.apenergy.2017.08.068

- Hammond GP, Hazeldine T (2015) Indicative energy technology assessment of advanced rechargeable batteries. *Appl Energy* 138:559–571 . doi: 10.1016/j.apenergy.2014.10.037
- Hanes RJ, Gopalakrishnan V, Bakshi BR (2017) Synergies and trade-offs in renewable energy landscapes: Balancing energy production with economics and ecosystem services. *Appl Energy* 199:25–44 . doi: 10.1016/j.apenergy.2017.04.081
- Hong T, Koo C, Lee S (2014) Benchmarks as a tool for free allocation through comparison with similar projects: Focused on multi-family housing complex. *Appl Energy* 114:663–675 . doi: 10.1016/j.apenergy.2013.10.035
- Hou G, Sun H, Jiang Z, et al (2016) Life cycle assessment of grid-connected photovoltaic power generation from crystalline silicon solar modules in China. *Appl Energy* 164:882–890 . doi: 10.1016/j.apenergy.2015.11.023
- Hutchinson T, Burgess S, Herrmann G (2014) Current hybrid-electric powertrain architectures: Applying empirical design data to life cycle assessment and whole-life cost analysis. *Appl Energy* 119:314–329 . doi: 10.1016/j.apenergy.2014.01.009
- Kabakian V, McManus MC, Harajli H (2015) Attributional life cycle assessment of mounted 1.8kWp monocrystalline photovoltaic system with batteries and comparison with fossil energy production system. *Appl Energy* 154:428–437 . doi: 10.1016/j.apenergy.2015.04.125
- Kanematsu Y, Oosawa K, Okubo T, Kikuchi Y (2017) Designing the scale of a woody biomass CHP considering local forestry reformation: A case study of Tanegashima, Japan. *Appl Energy* 198:160–172 . doi: 10.1016/j.apenergy.2017.04.021
- Kim J, Hong T, Jeong J, et al (2016) An optimization model for selecting the optimal green systems by considering the thermal comfort and energy consumption. *Appl Energy* 169:682–695 . doi: 10.1016/j.apenergy.2016.02.032
- Klein BC, Chagas MF, Junqueira TL, et al (2018) Techno-economic and environmental assessment of renewable jet fuel production in integrated Brazilian sugarcane biorefinerie. *Appl Energy* 209:290–305 . doi: 10.1016/j.apenergy.2017.10.079
- Lam CM, Leng L, Chen PC, et al (2017) Eco-efficiency analysis of non-potable water systems in domestic buildings. *Appl Energy* 202:293–307 . doi: 10.1016/j.apenergy.2017.05.095
- Lewis AM, Kelly JC, Keoleian GA (2014) Vehicle lightweighting vs. electrification: Life cycle energy and GHG emissions results for diverse powertrain vehicles. *Appl Energy* 126:13–20 . doi: 10.1016/j.apenergy.2014.03.023
- Li G, Xuan Q, Pei G, et al (2018) Life-cycle assessment of a low-concentration PV module for building south wall integration in China. *Appl Energy* 215:174–185 . doi: 10.1016/j.apenergy.2018.02.005
- Li M, Zhang X, Li G, Jiang C (2016) A feasibility study of microgrids for reducing energy use and GHG emissions in an industrial application. *Appl Energy* 176:138–148 . doi: 10.1016/j.apenergy.2016.05.070
- Lim CH, Lam HL (2016) Biomass supply chain optimisation via novel Biomass Element Life Cycle Analysis (BELCA). *Appl Energy* 161:733–745 . doi: 10.1016/j.apenergy.2015.07.030
- Lin YP, Wang WH, Pan SY, et al (2016) Environmental impacts and benefits of organic Rankine cycle power generation technology and wood pellet fuel exemplified by electric arc furnace steel industry. *Appl Energy* 183:369–379 . doi: 10.1016/j.apenergy.2016.08.183
- Long Y, Yoshida Y (2018) Quantifying city-scale emission responsibility based on input-output analysis – Insight from Tokyo, Japan. *Appl Energy* 218:349–360 . doi: 10.1016/j.apenergy.2018.02.167
- López-Ruiz A, Bergillos RJ, Raffo-Caballero JM, Ortega-Sánchez M (2018) Towards an optimum design of wave energy converter arrays through an integrated approach of life cycle performance and operational capacity. *Appl Energy* 209:20–32 . doi: 10.1016/j.apenergy.2017.10.062
- López-Sabirón AM, Royo P, Ferreira VJ, et al (2014) Carbon footprint of a thermal energy storage system using phase change materials for industrial energy recovery to reduce the fossil fuel consumption. *Appl Energy* 135:616–624 . doi: 10.1016/j.apenergy.2014.08.038
- Luis P, Amelio A, Vreysen S, et al (2014) Simulation and environmental evaluation of process design: Distillation vs. hybrid distillation–pervaporation for methanol/tetrahydrofuran separation. *Appl Energy* 113:565–575 . doi: 10.1016/j.apenergy.2013.06.040

- Manzone M (2015) Energy consumption and CO<sub>2</sub> analysis of different types of chippers used in wood biomass plantations. *Appl Energy* 156:686–692 . doi: 10.1016/j.apenergy.2015.07.049
- Matino I, Colla V, Baragiola S (2017) Quantification of energy and environmental impacts in uncommon electric steelmaking scenarios to improve process sustainability. *Appl Energy* 207:543–552 . doi: 10.1016/j.apenergy.2017.06.088
- Messagie M, Mertens J, Oliveira L, et al (2014) The hourly life cycle carbon footprint of electricity generation in Belgium, bringing a temporal resolution in life cycle assessment. *Appl Energy* 134:469–476 . doi: 10.1016/j.apenergy.2014.08.071
- Monteleone M, Cammerino ARB, Garofalo P, Delivand MK (2015) Straw-to-soil or straw-to-energy? An optimal trade off in a long term sustainability perspective. *Appl Energy* 154:891–899 . doi: 10.1016/j.apenergy.2015.04.108
- Murphy F, Devlin G, McDonnell K (2014) Forest biomass supply chains in Ireland: A life cycle assessment of GHG emissions and primary energy balances. *Appl Energy* 116:1–8 . doi: 10.1016/j.apenergy.2013.11.041
- Mutanga SS, de Vries M, Mbohwa C, et al (2016) An integrated approach for modeling the electricity value of a sugarcane production system. *Appl Energy* 177:823–838 . doi: 10.1016/j.apenergy.2016.05.131
- Nikodinoska N, Buonocore E, Paletto A, Franzese PP (2017) Wood-based bioenergy value chain in mountain urban districts: An integrated environmental accounting framework. *Appl Energy* 186:197–210 . doi: 10.1016/j.apenergy.2016.04.073
- Nimana B, Canter C, Kumar A (2015) Energy consumption and greenhouse gas emissions in the recovery and extraction of crude bitumen from Canada's oil sands. *Appl Energy* 143:189–199 . doi: 10.1016/j.apenergy.2015.01.024
- Njakou Djomo S, Witters N, Van Dael M, et al (2015) Impact of feedstock, land use change, and soil organic carbon on energy and greenhouse gas performance of biomass cogeneration technologies. *Appl Energy* 154:122–130 . doi: 10.1016/j.apenergy.2015.04.097
- Orsi F, Muratori M, Rocco M, et al (2016) A multi-dimensional well-to-wheels analysis of passenger vehicles in different regions: Primary energy consumption, CO<sub>2</sub> emissions, and economic cost. *Appl Energy* 169:197–209 . doi: 10.1016/j.apenergy.2016.02.039
- Pan SY, Lorente Lafuente AM, Chiang PC (2016) Engineering, environmental and economic performance evaluation of high-gravity carbonation process for carbon capture and utilization. *Appl Energy* 170:269–277 . doi: 10.1016/j.apenergy.2016.02.103
- Parkhurst KM, Saffron CM, Miller RO (2016) An energy analysis comparing biomass torrefaction in depots to wind with natural gas combustion for electricity generation. *Appl Energy* 179:171–181 . doi: 10.1016/j.apenergy.2016.05.121
- Pavão L V., Costa CBB, Ravagnani MASS, Jiménez L (2017) Costs and environmental impacts multi-objective heat exchanger networks synthesis using a meta-heuristic approach. *Appl Energy* 203:304–320 . doi: 10.1016/j.apenergy.2017.06.015
- Pérez-López P, de Vree JH, Feijoo G, et al (2017) Comparative life cycle assessment of real pilot reactors for microalgae cultivation in different seasons. *Appl Energy* 205:1151–1164 . doi: 10.1016/j.apenergy.2017.08.102
- Pierobon F, Zanetti M, Grigolato S, et al (2015) Life cycle environmental impact of firewood production - A case study in Italy. *Appl Energy* 150:185–195 . doi: 10.1016/j.apenergy.2015.04.033
- Porzio GF, Colla V, Fornai B, et al (2016) Process integration analysis and some economic-environmental implications for an innovative environmentally friendly recovery and pre-treatment of steel scrap. *Appl Energy* 161:656–672 . doi: 10.1016/j.apenergy.2015.08.086
- Rahman MM, Canter C, Kumar A (2015) Well-to-wheel life cycle assessment of transportation fuels derived from different North American conventional crudes. *Appl Energy* 156:159–173 . doi: 10.1016/j.apenergy.2015.07.004
- Rangaraju S, De Vroey L, Messagie M, et al (2015) Impacts of electricity mix, charging profile, and driving behavior on the emissions performance of battery electric vehicles: A Belgian case study. *Appl Energy* 148:496–505 . doi: 10.1016/j.apenergy.2015.01.121

- Ribau JP, Silva CM, Sousa JMC (2014) Efficiency, cost and life cycle CO<sub>2</sub> optimization of fuel cell hybrid and plug-in hybrid urban buses. *Appl Energy* 129:320–335 . doi: 10.1016/j.apenergy.2014.05.015
- Ricciardi P, Belloni E, Cotana F (2014) Innovative panels with recycled materials: Thermal and acoustic performance and Life Cycle Assessment. *Appl Energy* 134:150–162 . doi: 10.1016/j.apenergy.2014.07.112
- Ripa M, Fiorentino G, Giani H, et al (2017) Refuse recovered biomass fuel from municipal solid waste. A life cycle assessment. *Appl Energy* 186:211–225 . doi: 10.1016/j.apenergy.2016.05.058
- Sanfélix J, Messagie M, Omar N, et al (2015) Environmental performance of advanced hybrid energy storage systems for electric vehicle applications. *Appl Energy* 137:925–930 . doi: 10.1016/j.apenergy.2014.07.012
- Sastre CM, Carrasco J, Barro R, et al (2016) Improving bioenergy sustainability evaluations by using soil nitrogen balance coupled with life cycle assessment: A case study for electricity generated from rye biomass. *Appl Energy* 179:847–863 . doi: 10.1016/j.apenergy.2016.07.022
- Sastre CM, Maletta E, González-Arechavala Y, et al (2014) Centralised electricity production from winter cereals biomass grown under central-northern Spain conditions: Global warming and energy yield assessments. *Appl Energy* 114:737–748 . doi: 10.1016/j.apenergy.2013.08.035
- Sharifzadeh M, Wang L, Shah N (2015) Decarbonisation of olefin processes using biomass pyrolysis oil. *Appl Energy* 149:404–414 . doi: 10.1016/j.apenergy.2015.03.081
- Si P, Feng Y, Lv Y, et al (2017) An optimization method applied to active solar energy systems for buildings in cold plateau areas – The case of Lhasa. *Appl Energy* 194:487–498 . doi: 10.1016/j.apenergy.2016.11.066
- Sierra-Pérez J, Rodríguez-Soria B, Boschmonart-Rives J, Gabarrell X (2018) Integrated life cycle assessment and thermodynamic simulation of a public building's envelope renovation: Conventional vs. Passivhaus proposal. *Appl Energy* 212:1510–1521 . doi: 10.1016/j.apenergy.2017.12.101
- Smith L, Ibn-Mohammed T, Koh SCL, Reaney IM (2018) Life cycle assessment and environmental profile evaluations of high volumetric efficiency capacitors. *Appl Energy* 220:496–513 . doi: 10.1016/j.apenergy.2018.03.067
- Song D, Yang J, Chen B, et al (2016) Life-cycle environmental impact analysis of a typical cement production chain. *Appl Energy* 164:916–923 . doi: 10.1016/j.apenergy.2015.09.003
- Song J, Yang W, Higano Y, Wang X (2015) Dynamic integrated assessment of bioenergy technologies for energy production utilizing agricultural residues: An input-output approach. *Appl Energy* 158:178–189 . doi: 10.1016/j.apenergy.2015.08.030
- Stazi F, Tomassoni E, Bonfigli C, Di Perna C (2014) Energy, comfort and environmental assessment of different building envelope techniques in a Mediterranean climate with a hot dry summer. *Appl Energy* 134:176–196 . doi: 10.1016/j.apenergy.2014.08.023
- Suopajärvi H, Pongrácz E, Fabritius T (2014) Bioreducer use in Finnish blast furnace ironmaking - Analysis of CO<sub>2</sub> emission reduction potential and mitigation cost. *Appl Energy* 124:82–93 . doi: 10.1016/j.apenergy.2014.03.008
- Taxidis ET, Menexes GC, Mamolos AP, et al (2015) Comparing organic and conventional olive groves relative to energy use and greenhouse gas emissions associated with the cultivation of two varieties. *Appl Energy* 149:117–124 . doi: 10.1016/j.apenergy.2015.03.128
- Thakur A, Canter CE, Kumar A (2014) Life-cycle energy and emission analysis of power generation from forest biomass. *Appl Energy* 128:246–253 . doi: 10.1016/j.apenergy.2014.04.085
- Torres-Rivas A, Palumbo M, Haddad A, et al (2018) Multi-objective optimisation of bio-based thermal insulation materials in building envelopes considering condensation risk. *Appl Energy* 224:602–614 . doi: 10.1016/j.apenergy.2018.04.079
- Tripathy M, Joshi H, Panda SK (2017) Energy payback time and life-cycle cost analysis of building integrated photovoltaic thermal system influenced by adverse effect of shadow. *Appl Energy* 208:376–389 . doi: 10.1016/j.apenergy.2017.10.025
- Troy S, Schreiber A, Reppert T, et al (2016) Life Cycle Assessment and resource analysis of all-solid-state batteries. *Appl Energy* 169:757–767 . doi: 10.1016/j.apenergy.2016.02.064



- Tulus V, Boer D, Cabeza LF, et al (2016) Enhanced thermal energy supply via central solar heating plants with seasonal storage: A multi-objective optimization approach. *Appl Energy* 181:549–561 . doi: 10.1016/j.apenergy.2016.08.037
- Uddin K, Gough R, Radcliffe J, et al (2017) Techno-economic analysis of the viability of residential photovoltaic systems using lithium-ion batteries for energy storage in the United Kingdom. *Appl Energy* 206:12–21 . doi: 10.1016/j.apenergy.2017.08.170
- Verma A, Kumar A (2015) Life cycle assessment of heat production from underground coal gasification. *Appl Energy* 147:556–568 . doi: 10.1007/s11367-016-1102-0
- Wang H, Wu JJ, Zhu X, et al (2016) Energy-environment-economy evaluations of commercial scale systems for blast furnace slag treatment: Dry slag granulation vs. water quenching. *Appl Energy* 171:314–324 . doi: 10.1016/j.apenergy.2016.03.079
- Wang J, Yang Y, Mao T, et al (2015a) Life cycle assessment (LCA) optimization of solar-assisted hybrid CCHP system. *Appl Energy* 146:38–52 . doi: 10.1016/j.apenergy.2015.02.056
- Wang X, Lu M, Mao W, et al (2015b) Improving benefit-cost analysis to overcome financing difficulties in promoting energy-efficient renovation of existing residential buildings in China. *Appl Energy* 141:119–130 . doi: 10.1016/j.apenergy.2014.12.001
- Wang Y, Wei Y, Feng X, Chu KH (2014) Synthesis of heat exchanger networks featuring batch streams. *Appl Energy* 114:30–44 . doi: 10.1016/j.apenergy.2013.09.040
- Wu XD, Chen GQ (2017) Energy and water nexus in power generation: The surprisingly high amount of industrial water use induced by solar power infrastructure in China. *Appl Energy* 195:125–136 . doi: 10.1016/j.apenergy.2017.03.029
- Wu XD, Xia XH, Chen GQ, et al (2016) Embodied energy analysis for coal-based power generation system—highlighting the role of indirect energy cost. *Appl Energy* 184:936–950 . doi: 10.1016/j.apenergy.2016.03.027
- Yang MH, Yeh RH (2015) Thermodynamic and economic performances optimization of an organic Rankine cycle system utilizing exhaust gas of a large marine diesel engine. *Appl Energy* 149:1–12 . doi: 10.1016/j.apenergy.2015.03.083
- Yang Q, Liang J, Li J, et al (2018) Life cycle water use of a biomass-based pyrolysis polygeneration system in China. *Appl Energy* 224:469–480 . doi: 10.1016/j.apenergy.2018.05.009
- Yang Y, Brammer JG, Wright DG, et al (2017) Combined heat and power from the intermediate pyrolysis of biomass materials: performance, economics and environmental impact. *Appl Energy* 191:639–652 . doi: 10.1016/j.apenergy.2017.02.004
- Yu S, Wei YM, Guo H, Ding L (2014) Carbon emission coefficient measurement of the coal-to-power energy chain in China. *Appl Energy* 114:290–300 . doi: 10.1016/j.apenergy.2013.09.062
- Zech KM, Meisel K, Brosowski A, et al (2016) Environmental and economic assessment of the Inbicon lignocellulosic ethanol technology. *Appl Energy* 171:347–356 . doi: 10.1016/j.apenergy.2016.03.057
- Zhu X, Guo R, Chen B, et al (2015) Embodiment of virtual water of power generation in the electric power system in China. *Appl Energy* 151:345–354 . doi: 10.1016/j.apenergy.2015.04.082

## **4.2 Consequential life cycle assessment studies**

### **4.2.1 Uncertainty analysis performed**

#### **4.2.1a Monte Carlo-like approaches**

- Crossin E, Doherty PJB (2016) The effect of charging time on the comparative environmental performance of different vehicle types. *Appl Energy* 179:716–726 . doi: 10.1016/j.apenergy.2016.07.040
- Igos E, Rugani B, Rege S, et al (2015) Combination of equilibrium models and hybrid life cycle-input-output analysis to predict the environmental impacts of energy policy scenarios. *Appl Energy* 145:234–245 . doi: 10.1016/j.apenergy.2015.02.007
- Pereira LG, Dias MOS, Mariano AP, et al (2015) Economic and environmental assessment of n-butanol production in an integrated first and second generation sugarcane biorefinery: Fermentative versus catalytic routes. *Appl Energy* 160:120–131 . doi: 10.1016/j.apenergy.2015.09.063

#### **4.2.1b Probabilistic (other than Monte Carlo)**

None.

#### **4.2.1c Taylor series**

None.

#### **4.2.1d Scenario analysis**

None.

#### **4.2.1e Qualitative/pedigree**

None.

#### **4.2.1f Sensitivity analysis**

Welsch B, Göllner-Völker L, Schulte DO, et al (2018) Environmental and economic assessment of borehole thermal energy storage in district heating systems. *Appl Energy* 216:73–90 . doi: 10.1016/j.apenergy.2018.02.011

#### **4.2.1g Fuzzy logic**

None.

#### **4.2.1h Bayesian**

None.

#### **4.2.1i Regression**

None.

#### **4.2.1j Not indicated/other**

None.

#### **4.2.2 Uncertainty analysis reported as not performed**

None.

#### **4.2.3 Uncertainty mentioned but no analysis performed**

Hamelin L, Naroznova I, Wenzel H (2014) Environmental consequences of different carbon alternatives for increased manure-based biogas. *Appl Energy* 114:774–782 . doi: 10.1016/j.apenergy.2013.09.033

Levasseur A, Bahn O, Beloin-Saint-Pierre D, et al (2017) Assessing butanol from integrated forest biorefinery: A combined techno-economic and life cycle approach. *Appl Energy* 198:440–452 . doi: 10.1016/j.apenergy.2017.04.040

Liu Z, Qiu T, Chen B (2014) A study of the LCA based biofuel supply chain multi-objective optimization model with multi-conversion paths in China. *Appl Energy* 126:221–234 . doi: 10.1016/j.apenergy.2014.04.001

Perrin A, Wohlfahrt J, Morandi F, et al (2017) Integrated design and sustainable assessment of innovative biomass supply chains: A case-study on miscanthus in France. *Appl Energy* 204:66–77 . doi: 10.1016/j.apenergy.2017.06.093

Pour N, Webley PA, Cook PJ (2018) Opportunities for application of BECCS in the Australian power sector. *Appl Energy* 224:615–635 . doi: 10.1016/j.apenergy.2018.04.117

Sigurjonsson HÆ, Elmegaard B, Clausen LR, Ahrenfeldt J (2015) Climate effect of an integrated wheat production and bioenergy system with Low Temperature Circulating Fluidized Bed gasifier. *Appl Energy* 160:511–520 . doi: 10.1016/j.apenergy.2015.08.114

Silalertruksa T, Gheewala SH, Pongpat P (2015) Sustainability assessment of sugarcane biorefinery and molasses ethanol production in Thailand using eco-efficiency indicator. *Appl Energy* 160:603–609 . doi: 10.1016/j.apenergy.2015.08.087

Tokunaga K, Konan DE (2014) Home grown or imported? Biofuels life cycle GHG emissions in electricity generation and transportation. *Appl Energy* 125:123–131 . doi: 10.1016/j.apenergy.2014.03.026

Vögele S, Rübhelke D, Mayer P, Kuckshinrichs W (2018) Germany’s “No” to carbon capture and storage: Just a question of lacking acceptance? *Appl Energy* 214:205–218 . doi: 10.1016/j.apenergy.2018.01.077

#### **4.2.4 No mention of uncertainty**

Buchspies B, Kaltschmitt M (2018) A consequential assessment of changes in greenhouse gas emissions due to the introduction of wheat straw ethanol in the context of European legislation. *Appl Energy* 211:368–381 . doi: 10.1016/j.apenergy.2017.10.105

Nagashima S, Uchiyama Y, Okajima K (2017) Hybrid input–output table method for socioeconomic and environmental assessment of a wind power generation system. *Appl Energy* 185:1067–1075 . doi: 10.1016/j.apenergy.2016.01.018

Rogers JG, Cooper SJG, O’Grady T, et al (2015) The 20% house - An integrated assessment of options for reducing net carbon emissions from existing UK houses. *Appl Energy* 138:108–120 . doi: 10.1016/j.apenergy.2014.10.047

Zhou W, Wang T, Yu Y, et al (2016) Scenario analysis of CO<sub>2</sub> emissions from China’s civil aviation industry through 2030. *Appl Energy* 175:100–108 . doi: 10.1016/j.apenergy.2016.05.004

### **4.3 Combination attributional and consequential life cycle assessment studies**

#### **4.3.1 Uncertainty analysis performed**

##### **4.3.1a Monte Carlo-like approaches**

None.

##### **4.3.1b Probabilistic (other than Monte Carlo)**

None.

##### **4.3.1c Taylor series**

None.

##### **4.3.1d Scenario analysis**

None.

##### **4.3.1e Qualitative/pedigree**

None.

##### **4.3.1f Sensitivity analysis**

None.

##### **4.3.1g Fuzzy logic**

None.

##### **4.3.1h Bayesian**

None.

##### **4.3.1i Regression**

None.

##### **4.3.1j Not indicated/other**

None.

#### **4.3.2 Uncertainty analysis reported as not performed**

None.

#### **4.3.3 Uncertainty mentioned but no analysis performed**

None.

#### **4.3.4 No mention of uncertainty**

None.

### **5. Science of the Total Environment**

#### **5.1 Attributional life cycle assessment studies**

##### **5.1.1 Uncertainty analysis performed**

###### **5.1.1a Monte Carlo-like approaches**

- Bacchetti J, Cavaliere A, Falcone G, et al (2018) Shelf life extension as solution for environmental impact mitigation: A case study for bakery products. *Sci Total Environ* 627:997–1007 . doi: 10.1016/j.scitotenv.2018.01.301
- Baldini C, Bava L, Zucali M, Guarino M (2018) Milk production Life Cycle Assessment: A comparison between estimated and measured emission inventory for manure handling. *Sci Total Environ* 625:209–219 . doi: 10.1016/j.scitotenv.2017.12.261
- Bartzas G, Komnitsas K (2017) Life cycle analysis of pistachio production in Greece. *Sci Total Environ* 595:13–24 . doi: 10.1016/j.scitotenv.2017.03.251
- Bieda B (2014) Application of stochastic approach based on Monte Carlo (MC) simulation for life cycle inventory (LCI) to the steel process chain: Case study. *Sci Total Environ* 481:649–655 . doi: 10.1016/j.scitotenv.2013.10.123
- Bonamente E, Scrucca F, Rinaldi S, et al (2016) Environmental impact of an Italian wine bottle: Carbon and water footprint assessment. *Sci Total Environ* 560–561:274–283 . doi: 10.1016/j.scitotenv.2016.04.026
- Deng Y, Paraskevas D, Cao SJ (2017) Incorporating denitrification-decomposition method to estimate field emissions for Life Cycle Assessment. *Sci Total Environ* 593–594:65–74 . doi: 10.1016/j.scitotenv.2017.03.112
- Finnegan W, Goggins J, Clifford E, Zhan X (2017) Environmental impacts of milk powder and butter manufactured in the Republic of Ireland. *Sci Total Environ* 579:159–168 . doi: 10.1016/j.scitotenv.2016.10.237
- Forte A, Zucaro A, Fagnano M, Fierro A (2017) Potential environmental impact of bioethanol production chain from fiber sorghum to be used in passenger cars. *Sci Total Environ* 598:365–376 . doi: 10.1016/j.scitotenv.2017.03.244
- Gallejones P, Pardo G, Aizpurua A, del Prado A (2015) Life cycle assessment of first-generation biofuels using a nitrogen crop model. *Sci Total Environ* 505:1191–1201 . doi: 10.1016/j.scitotenv.2014.10.061
- Lacirignola M, Blanc P, Girard R, et al (2017) LCA of emerging technologies: addressing high uncertainty on inputs' variability when performing global sensitivity analysis. *Sci Total Environ* 578:268–280 . doi: 10.1016/j.scitotenv.2016.10.066
- Luján-Ornelas C, del C. Sternenfels UM, Guereca LP (2018) Life cycle assessment of Mexican polymer and high-durability cotton paper banknotes. *Sci Total Environ* 630:409–421 . doi: 10.1016/j.scitotenv.2018.02.177
- Mayo M, Collier ZA, Hoang V, Chappell M (2014) Uncertainty in multi-media fate and transport models: A case study for TNT life cycle assessment. *Sci Total Environ* 494–495:104–112 . doi: 10.1016/j.scitotenv.2014.06.061
- Meneses M, Torres CM, Castells F (2016) Sensitivity analysis in a life cycle assessment of an aged red wine production from Catalonia, Spain. *Sci Total Environ* 562:571–579 . doi: 10.1016/j.scitotenv.2016.04.083
- Pérez-López P, Montazeri M, Feijoo G, et al (2018) Integrating uncertainties to the combined environmental and economic assessment of algal biorefineries: A Monte Carlo approach. *Sci Total Environ* 626:762–775 . doi: 10.1016/j.scitotenv.2017.12.339
- Song G, Li M, Fullana-i-Palmer P, et al (2017) Dietary changes to mitigate climate change and benefit public health in China. *Sci Total Environ* 577:289–298 . doi: 10.1016/j.scitotenv.2016.10.184

Vagnoni E, Franca A, Breedveld L, et al (2015) Environmental performances of Sardinian dairy sheep production systems at different input levels. *Sci Total Environ* 502:354–361 . doi: 10.1016/j.scitotenv.2014.09.020

Xia L, Ti C, Li B, et al (2016) Greenhouse gas emissions and reactive nitrogen releases during the life-cycles of staple food production in China and their mitigation potential. *Sci Total Environ* 556:116–125 . doi: 10.1016/j.scitotenv.2016.02.204

#### **5.1.1b Probabilistic (other than Monte Carlo)**

None.

#### **5.1.1c Taylor series**

Sun M, Wang Y, Shi L (2018) Environmental performance of straw-based pulp making: A life cycle perspective. *Sci Total Environ* 616–617:753–762 . doi: 10.1016/j.scitotenv.2017.10.250

#### **5.1.1d Scenario analysis**

None.

#### **5.1.1e Qualitative/pedigree**

None.

#### **5.1.1f Sensitivity analysis**

None.

#### **5.1.1g Fuzzy logic**

None.

#### **5.1.1h Bayesian**

None.

#### **5.1.1i Regression**

None.

#### **5.1.1j Not indicated/other**

Hayashi K, Nagumo Y, Domoto A (2016) Linking environment-productivity trade-offs and correlated uncertainties: Greenhouse gas emissions and crop productivity in paddy rice production systems. *Sci Total Environ* 571:134–141 . doi: 10.1016/j.scitotenv.2016.07.138

Li X, Mupondwa E (2014) Life cycle assessment of camelina oil derived biodiesel and jet fuel in the Canadian Prairies. *Sci Total Environ* 481:17–26 . doi: 10.1016/j.scitotenv.2014.02.003

#### **5.1.2 Uncertainty analysis reported as not performed**

Millward-Hopkins J, Busch J, Purnell P, et al (2018) Fully integrated modelling for sustainability assessment of resource recovery from waste. *Sci Total Environ* 612:613–624 . doi: 10.1016/j.scitotenv.2017.08.211

Nordborg M, Davis J, Cederberg C, Woodhouse A (2017) Freshwater ecotoxicity impacts from pesticide use in animal and vegetable foods produced in Sweden. *Sci Total Environ* 581–582:448–459 . doi: 10.1016/j.scitotenv.2016.12.153

Pieragostini C, Aguirre P, Mussati MC (2014) Life cycle assessment of corn-based ethanol production in Argentina. *Sci Total Environ* 472:212–225 . doi: 10.1016/j.scitotenv.2013.11.012

#### **5.1.3 Uncertainty mentioned but no analysis performed**

Bacenetti J, Bava L, Zucali M, et al (2016) Anaerobic digestion and milking frequency as mitigation strategies of the environmental burden in the milk production system. *Sci Total Environ* 539:450–459 . doi: 10.1016/j.scitotenv.2015.09.015

- Bacenetti J, Duca D, Negri M, et al (2015) Mitigation strategies in the agro-food sector: The anaerobic digestion of tomato purée by-products. An Italian case study. *Sci Total Environ* 526:88–97 . doi: 10.1016/j.scitotenv.2015.04.069
- Ballesteros Cánovas JA, Stoffel M, Corona C, et al (2016) Debris-flow risk analysis in a managed torrent based on a stochastic life-cycle performance. *Sci Total Environ* 557–558:142–153 . doi: 10.1016/j.scitotenv.2016.03.036
- Barberio G, Scalbi S, Buttol P, et al (2014) Combining life cycle assessment and qualitative risk assessment: The case study of alumina nanofluid production. *Sci Total Environ* 496:122–131 . doi: 10.1016/j.scitotenv.2014.06.135
- Bates ME, Fox-Lent C, Seymour L, et al (2015) Life cycle assessment for dredged sediment placement strategies. *Sci Total Environ* 511:309–318 . doi: 10.1016/j.scitotenv.2014.11.003
- Battini F, Agostini A, Boulamanti AK, et al (2014) Mitigating the environmental impacts of milk production via anaerobic digestion of manure: Case study of a dairy farm in the Po Valley. *Sci Total Environ* 481:196–208 . doi: 10.1016/j.scitotenv.2014.02.038
- Bernardi B, Falcone G, Stillitano T, et al (2018) Harvesting system sustainability in Mediterranean olive cultivation. *Sci Total Environ* 625:1446–1458 . doi: 10.1016/j.scitotenv.2018.01.005
- Boone L, Van linden V, De Meester S, et al (2016) Environmental life cycle assessment of grain maize production: An analysis of factors causing variability. *Sci Total Environ* 553:551–564 . doi: 10.1016/j.scitotenv.2016.02.089
- Caro D, Rugani B, Pulselli FM, Benetto E (2015) Implications of a consumer-based perspective for the estimation of GHG emissions: The illustrative case of Luxembourg. *Sci Total Environ* 508:67–75 . doi: 10.1016/j.scitotenv.2014.11.053
- Cellura M, Cusenza MA, Longo S (2018) Energy-related GHG emissions balances: IPCC versus LCA. *Sci Total Environ* 628–629:1328–1339 . doi: 10.1016/j.scitotenv.2018.02.145
- Chen W, Holden NM (2018) Bridging environmental and financial cost of dairy production: A case study of Irish agricultural policy. *Sci Total Environ* 615:597–607 . doi: 10.1016/j.scitotenv.2017.09.310
- Demertzi M, Paulo JA, Arroja L, Dias AC (2016) A carbon footprint simulation model for the cork oak sector. *Sci Total Environ* 566–567:499–511 . doi: 10.1016/j.scitotenv.2016.05.135
- Ferreira C, Ribeiro J, Almada S, et al (2016) Reducing impacts from ammunitions: A comparative life-cycle assessment of four types of 9 mm ammunitions. *Sci Total Environ* 566–567:34–40 . doi: 10.1016/j.scitotenv.2016.05.005
- Foteinis S, Monteagudo JM, Durán A, Chatzisyneon E (2018) Environmental sustainability of the solar photo-Fenton process for wastewater treatment and pharmaceuticals mineralization at semi-industrial scale. *Sci Total Environ* 612:605–612 . doi: 10.1016/j.scitotenv.2017.08.277
- Fusi A, Bacenetti J, Gonza'lez-Garci'a S, et al (2014a) Environmental profile of paddy rice cultivation with different straw management. *Sci Total Environ* 494–495:119–128 . doi: 10.1016/j.scitotenv.2014.06.126
- Fusi A, Guidetti R, Benedetto G (2014b) Delving into the environmental aspect of a Sardinian white wine: From partial to total life cycle assessment. *Sci Total Environ* 472:989–1000 . doi: 10.1016/j.scitotenv.2013.11.148
- Gallego-Schmid A, Jeswani HK, Mendoza JMF, Azapagic A (2018a) Life cycle environmental evaluation of kettles: Recommendations for the development of eco-design regulations in the European Union. *Sci Total Environ* 625:135–146 . doi: 10.1016/j.scitotenv.2017.12.262
- Gallego-Schmid A, Mendoza JMF, Azapagic A (2018b) Environmental assessment of microwaves and the effect of European energy efficiency and waste management legislation. *Sci Total Environ* 618:487–499 . doi: 10.1016/j.scitotenv.2017.11.064
- Gallego-Schmid A, Mendoza JMF, Azapagic A (2018c) Improving the environmental sustainability of reusable food containers in Europe. *Sci Total Environ* 628–629:979–989 . doi: 10.1016/j.scitotenv.2018.02.128
- Gallego-Schmid A, Mendoza JMF, Jeswani HK, Azapagic A (2016) Life cycle environmental impacts of vacuum cleaners and the effects of European regulation. *Sci Total Environ* 559:192–203 . doi: 10.1016/j.scitotenv.2016.03.149

- García-Herrero I, Margallo M, Onandía R, et al (2017) Environmental challenges of the chlor-alkali production: Seeking answers from a life cycle approach. *Sci Total Environ* 580:147–157 . doi: 10.1016/j.scitotenv.2016.10.202
- Godskesen B, Hauschild M, Albrechtsen HJ, Rygaard M (2018) ASTA — A method for multi-criteria evaluation of water supply technologies to assess the most sustainable alternative for Copenhagen. *Sci Total Environ* 618:399–408 . doi: 10.1016/j.scitotenv.2017.11.018
- Goglio P, Grant BB, Smith WN, et al (2014) Impact of management strategies on the global warming potential at the cropping system level. *Sci Total Environ* 490:921–933 . doi: 10.1016/j.scitotenv.2014.05.070
- González-García S, Dias AC, Feijoo G, et al (2014) Divergences on the environmental impact associated to the production of maritime pine wood in Europe: French and Portuguese case studies. *Sci Total Environ* 472:324–337 . doi: 10.1016/j.scitotenv.2013.11.034
- Gullón P, Gullón B, Dávila I, et al (2018) Comparative environmental Life Cycle Assessment of integral revalorization of vine shoots from a biorefinery perspective. *Sci Total Environ* 624:225–240 . doi: 10.1016/j.scitotenv.2017.12.036
- Harris F, Green RF, Joy EJM, et al (2017) The water use of Indian diets and socio-demographic factors related to dietary blue water footprint. *Sci Total Environ* 587–588:128–136 . doi: 10.1016/j.scitotenv.2017.02.085
- Hauggaard-Nielsen H, Lachouani P, Knudsen MT, et al (2016) Productivity and carbon footprint of perennial grass-forage legume intercropping strategies with high or low nitrogen fertilizer input. *Sci Total Environ* 541:1339–1347 . doi: 10.1016/j.scitotenv.2015.10.013
- Huysegoms L, Rousseau S, Cappuyns V (2018) Friends or foes? Monetized Life Cycle Assessment and Cost-Benefit Analysis of the site remediation of a former gas plant. *Sci Total Environ* 619–620:258–271 . doi: 10.1016/j.scitotenv.2017.10.330
- Ingrao C, Tricase C, Cholewa-Wójcik A, et al (2015) Polylactic acid trays for fresh-food packaging: A Carbon Footprint assessment. *Sci Total Environ* 537:385–398 . doi: 10.1016/j.scitotenv.2015.08.023
- Joseph T, Baah K, Jahanfar A, Dubey B (2015) A comparative life cycle assessment of conventional hand dryer and roll paper towel as hand drying methods. *Sci Total Environ* 515–516:109–117 . doi: 10.1016/j.scitotenv.2015.01.112
- Kalbar PP, Muñoz I, Birkved M (2018) WW LCI v2: A second-generation life cycle inventory model for chemicals discharged to wastewater systems. *Sci Total Environ* 622–623:1649–1657 . doi: 10.1016/j.scitotenv.2017.10.051
- Khoshnevisan B, Rajaeifar MA, Clark S, et al (2014) Evaluation of traditional and consolidated rice farms in Guilan Province, Iran, using life cycle assessment and fuzzy modeling. *Sci Total Environ* 481:242–251 . doi: 10.1016/j.scitotenv.2014.02.052
- Kuittinen M, Moinel C, Adalgeirsdottir K (2016) Carbon sequestration through urban ecosystem services: A case study from Finland. *Sci Total Environ* 563–564:623–632 . doi: 10.1016/j.scitotenv.2016.03.168
- Laratte B, Guillaume B, Kim J, Birregah B (2014) Modeling cumulative effects in life cycle assessment: The case of fertilizer in wheat production contributing to the global warming potential. *Sci Total Environ* 481:588–595 . doi: 10.1016/j.scitotenv.2014.02.020
- Laschi A, Marchi E, González-García S (2016) Forest operations in coppice: Environmental assessment of two different logging methods. *Sci Total Environ* 562:493–503 . doi: 10.1016/j.scitotenv.2016.04.041
- Laso J, Margallo M, Serrano M, et al (2018) Introducing the Green Protein Footprint method as an understandable measure of the environmental cost of anchovy consumption. *Sci Total Environ* 621:40–53 . doi: 10.1016/j.scitotenv.2017.11.148
- le Roux B, van der Laan M, Vahrmeijer T, et al (2017) Establishing and testing a catchment water footprint framework to inform sustainable irrigation water use for an aquifer under stress. *Sci Total Environ* 599–600:1119–1129 . doi: 10.1016/j.scitotenv.2017.04.170
- Leclerc A, Laurent A (2017) Framework for estimating toxic releases from the application of manure on agricultural soil: National release inventories for heavy metals in 2000–2014. *Sci Total Environ* 590–591:452–460 . doi: 10.1016/j.scitotenv.2017.01.117
- Lorenzo-Toja Y, Alfonsín C, Amores MJ, et al (2016a) Beyond the conventional life cycle inventory in wastewater treatment plants. *Sci Total Environ* 553:71–82 . doi: 10.1016/j.scitotenv.2016.02.073

- Lorenzo-Toja Y, Vázquez-Rowe I, Amores MJ, et al (2016b) Benchmarking wastewater treatment plants under an eco-efficiency perspective. *Sci Total Environ* 566–567:468–479 . doi: 10.1016/j.scitotenv.2016.05.110
- Martinez S, Marchamalo M, Alvarez S (2018) Organization environmental footprint applying a multi-regional input-output analysis: A case study of a wood parquet company in Spain. *Sci Total Environ* 618:7–14 . doi: 10.1016/j.scitotenv.2017.10.306
- Mellino S, Buonocore E, Ulgiati S (2015) The worth of land use: A GIS-emergy evaluation of natural and human-made capital. *Sci Total Environ* 506–507:137–148 . doi: 10.1016/j.scitotenv.2014.10.085
- Miguel Ayala L, van Eupen M, Zhang G, et al (2016) Impact of agricultural expansion on water footprint in the Amazon under climate change scenarios. *Sci Total Environ* 569–570:1159–1173 . doi: 10.1016/j.scitotenv.2016.06.191
- Morales M, Gonzalez-García S, Aroca G, Moreira MT (2015) Life cycle assessment of gasoline production and use in Chile. *Sci Total Environ* 505:833–843 . doi: 10.1016/j.scitotenv.2014.10.067
- Nessi S, Rigamonti L, Grosso M (2014) Waste prevention in liquid detergent distribution: A comparison based on life cycle assessment. *Sci Total Environ* 499:373–383 . doi: 10.1016/j.scitotenv.2014.08.024
- Noya I, Aldea X, González-García S, et al (2017) Environmental assessment of the entire pork value chain in Catalonia – A strategy to work towards Circular Economy. *Sci Total Environ* 589:122–129 . doi: 10.1016/j.scitotenv.2017.02.186
- Noya I, González-García S, Berzosa J, et al (2018) Environmental and water sustainability of milk production in Northeast Spain. *Sci Total Environ* 616–617:1317–1329 . doi: 10.1016/j.scitotenv.2017.10.186
- Ortiz de García S, García-Encina PA, Irusta-Mata R (2017) The potential ecotoxicological impact of pharmaceutical and personal care products on humans and freshwater, based on USEtox<sup>TM</sup> characterization factors. A Spanish case study of toxicity impact scores. *Sci Total Environ* 609:429–445 . doi: 10.1016/j.scitotenv.2017.07.148
- Pahlow M, van Oel PR, Mekonnen MM, Hoekstra AY (2015) Increasing pressure on freshwater resources due to terrestrial feed ingredients for aquaculture production. *Sci Total Environ* 536:847–857 . doi: 10.1016/j.scitotenv.2015.07.124
- Patel B, Guo M, Chong C, et al (2016) Hydrothermal upgrading of algae paste: Inorganics and recycling potential in the aqueous phase. *Sci Total Environ* 568:489–497 . doi: 10.1016/j.scitotenv.2016.06.041
- Pérez-López P, Ternon E, González-García S, et al (2014) Environmental solutions for the sustainable production of bioactive natural products from the marine sponge *Crambe crambe*. *Sci Total Environ* 475:71–82 . doi: 10.1016/j.scitotenv.2013.12.068
- Petit-Boix A, Arahuetes A, Josa A, et al (2017). Are we preventing flood damage eco-efficiently? An integrated method applied to post-disaster emergency actions. *Sci Total Environ*. 580:873–881 . doi: 10.1016/j.scitotenv.2016.12.034
- Pini M, Bondioli F, Montecchi R, et al (2017) Environmental and human health assessment of life cycle of nanoTiO<sub>2</sub>functionalized porcelain stoneware tile. *Sci Total Environ* 577:113–121 . doi: 10.1016/j.scitotenv.2016.10.115
- Rafiee S, Khoshnevisan B, Mohammadi I, et al (2016) Sustainability evaluation of pasteurized milk production with a life cycle assessment approach: An Iranian case study. *Sci Total Environ* 562:614–627 . doi: 10.1016/j.scitotenv.2016.04.070
- Rana R, Ingrao C, Lombardi M, Tricase C (2016) Greenhouse gas emissions of an agro-biogas energy system: Estimation under the Renewable Energy Directive. *Sci Total Environ* 550:1182–1195 . doi: 10.1016/j.scitotenv.2015.10.164
- Rinaldi S, Barbanera M, Lascaro E (2014) Assessment of carbon footprint and energy performance of the extra virgin olive oil chain in Umbria, Italy. *Sci Total Environ* 482–483:71–79 . doi: 10.1016/j.scitotenv.2014.02.104
- Roibás L, Loiseau E, Hospido A (2018) On the feasibility and interest of applying territorial Life Cycle Assessment to determine subnational normalisation factors. *Sci Total Environ* 626:1086–1099 . doi: 10.1016/j.scitotenv.2018.01.126



- Roibás L, Martínez I, Goris A, et al (2016) An analysis on how switching to a more balanced and naturally improved milk would affect consumer health and the environment. *Sci Total Environ* 566–567:685–697 . doi: 10.1016/j.scitotenv.2016.05.141
- Rugani B, Roviani D, Hild P, et al (2014) Ecological deficit and use of natural capital in Luxembourg from 1995 to 2009. *Sci Total Environ* 468–469:292–301 . doi: 10.1016/j.scitotenv.2013.07.122
- Segheta M, Tørring D, Bruhn A, Thomsen M (2016) Bioextraction potential of seaweed in Denmark - An instrument for circular nutrient management. *Sci Total Environ* 563–564:513–529 . doi: 10.1016/j.scitotenv.2016.04.010
- Shimako AH, Tiruta-Barna L, Ahmadi A (2017) Operational integration of time dependent toxicity impact category in dynamic LCA. *Sci Total Environ* 599–600:806–819 . doi: 10.1016/j.scitotenv.2017.04.211
- Shimako AH, Tiruta-Barna L, Bisinella de Faria AB, et al (2018) Sensitivity analysis of temporal parameters in a dynamic LCA framework. *Sci Total Environ* 624:1250–1262 . doi: 10.1016/j.scitotenv.2017.12.220
- Śliwińska A, Burchart-Korol D, Smoliński A (2017) Environmental life cycle assessment of methanol and electricity co-production system based on coal gasification technology. *Sci Total Environ* 574:1571–1579 . doi: 10.1016/j.scitotenv.2016.08.188
- Song Y, Hou D, Zhang J, et al (2018) Environmental and socio-economic sustainability appraisal of contaminated land remediation strategies: A case study at a mega-site in China. *Sci Total Environ* 610–611:391–401 . doi: 10.1016/j.scitotenv.2017.08.016
- Tabatabaie SMH, Bolte JP, Murthy GS (2018) A regional scale modeling framework combining biogeochemical model with life cycle and economic analysis for integrated assessment of cropping systems. *Sci Total Environ* 625:428–439 . doi: 10.1016/j.scitotenv.2017.12.208
- van der Harst E, Potting J, Kroeze C (2014) Multiple data sets and modelling choices in a comparative LCA of disposable beverage cups. *Sci Total Environ* 494–495:129–143 . doi: 10.1016/j.scitotenv.2014.06.084
- Vázquez-Rowe I, Torres-García JR, Cáceres AL, et al (2017) Assessing the magnitude of potential environmental impacts related to water and toxicity in the Peruvian hyper-arid coast: A case study for the cultivation of grapes for pisco production. *Sci Total Environ* 601–602:532–542 . doi: 10.1016/j.scitotenv.2017.05.221
- Vázquez-Rowe I, Villanueva-Rey P, Hospido A, et al (2014) Life cycle assessment of European pilchard (*Sardina pilchardus*) consumption. A case study for Galicia (NW Spain). *Sci Total Environ* 475:48–60 . doi: 10.1016/j.scitotenv.2013.12.099
- Vigil M, Marey-Pérez MF, Martínez Huerta G, Álvarez Cabal V (2015) Is phytoremediation without biomass valorization sustainable? - Comparative LCA of landfilling vs. anaerobic co-digestion. *Sci Total Environ* 505:844–850 . doi: 10.1016/j.scitotenv.2014.10.047
- Wäger PA, Hirschler R (2015) Life cycle assessment of post-consumer plastics production from waste electrical and electronic equipment (WEEE) treatment residues in a Central European plastics recycling plant. *Sci Total Environ* 529:158–167 . doi: 10.1016/j.scitotenv.2015.05.043
- Wang X, Ledgard S, Luo J, et al (2018) Environmental impacts and resource use of milk production on the North China Plain, based on life cycle assessment. *Sci Total Environ* 625:486–495 . doi: 10.1016/j.scitotenv.2017.12.259
- Xue M, Kojima N, Machimura T, Tokai A (2017) Flow, stock, and impact assessment of refrigerants in the Japanese household air conditioner sector. *Sci Total Environ* 586:1308–1315 . doi: 10.1016/j.scitotenv.2017.02.145
- Yang D, Xu L, Gao X, et al (2018) Inventories and reduction scenarios of urban waste-related greenhouse gas emissions for management potential. *Sci Total Environ* 626:727–736 . doi: 10.1016/j.scitotenv.2018.01.110
- Yao Z, Zhang D, Yao P, et al (2017) Coupling life-cycle assessment and the RothC model to estimate the carbon footprint of green manure-based wheat production in China. *Sci Total Environ* 607–608:433–442 . doi: 10.1016/j.scitotenv.2017.07.028

#### 5.1.4 No mention of uncertainty

- Abdou K, Gascuel D, Aubin J, et al (2018) Environmental life cycle assessment of seafood production: A case study of trawler catches in Tunisia. *Sci Total Environ* 610–611:298–307 . doi: 10.1016/j.scitotenv.2017.08.067
- Arbault D, Rugani B, Marvuglia A, et al (2014) Emergy evaluation using the calculation software SCALE: Case study, added value and potential improvements. *Sci Total Environ* 472:608–619 . doi: 10.1016/j.scitotenv.2013.11.087
- Bacenetti J, Fusi A, Negri M, et al (2014) Environmental assessment of two different crop systems in terms of biomethane potential production. *Sci Total Environ* 466–467:1066–1077 . doi: 10.1016/j.scitotenv.2013.07.109
- Bacenetti J, Pessina D, Fiala M (2016) Environmental assessment of different harvesting solutions for Short Rotation Coppice plantations. *Sci Total Environ* 541:210–217 . doi: 10.1016/j.scitotenv.2015.09.095
- Bava L, Bacenetti J, Gislou G, et al (2018) Impact assessment of traditional food manufacturing: The case of Grana Padano cheese. *Sci Total Environ* 626:1200–1209 . doi: 10.1016/j.scitotenv.2018.01.143
- Bazán J, Rieradevall J, Gabarrell X, Vázquez-Rowe I (2018) Low-carbon electricity production through the implementation of photovoltaic panels in rooftops in urban environments: A case study for three cities in Peru. *Sci Total Environ* 622–623:1448–1462 . doi: 10.1016/j.scitotenv.2017.12.003
- Biganzoli L, Falbo A, Forte F, et al (2015) Mass balance and life cycle assessment of the waste electrical and electronic equipment management system implemented in Lombardia Region (Italy). *Sci Total Environ* 524–525:361–375 . doi: 10.1016/j.scitotenv.2015.04.041
- Bindra N, Dubey B, Dutta A (2015) Technological and life cycle assessment of organics processing odour control technologies. *Sci Total Environ* 527–528:401–412 . doi: 10.1016/j.scitotenv.2015.05.023
- Buratti C, Fantozzi F, Barbanera M, et al (2017) Carbon footprint of conventional and organic beef production systems: An Italian case study. *Sci Total Environ* 576:129–137 . doi: 10.1016/j.scitotenv.2016.10.075
- Burchart-Korol D, Fugiel A, Czaplicka-Kolarz K, Turek M (2016) Model of environmental life cycle assessment for coal mining operations. *Sci Total Environ* 562:61–72 . doi: 10.1016/j.scitotenv.2016.03.202
- Chen S, Zhang J, Kim J (2017) Life cycle analysis of greenhouse gas emissions for fluorescent lamps in mainland China. *Sci Total Environ* 575:467–473 . doi: 10.1016/j.scitotenv.2016.07.058
- Colangelo F, Petrillo A, Cioffi R, et al (2018) Life cycle assessment of recycled concretes: A case study in southern Italy. *Sci Total Environ* 615:1506–1517 . doi: 10.1016/j.scitotenv.2017.09.107
- Cooper J, Stamford L, Azapagic A (2018) Sustainability of UK shale gas in comparison with other electricity options: Current situation and future scenarios. *Sci Total Environ* 619–620:804–814 . doi: 10.1016/j.scitotenv.2017.11.140
- Corbella C, Puigagut J, Garfí M (2017) Life cycle assessment of constructed wetland systems for wastewater treatment coupled with microbial fuel cells. *Sci Total Environ* 584–585:355–362 . doi: 10.1016/j.scitotenv.2016.12.186
- de Oliveira Schwaickhardt R, Machado ÊL, Lutterbeck CA (2017) Combined use of VUV and UVC photoreactors for the treatment of hospital laundry wastewaters: Reduction of load parameters, detoxification and life cycle assessment of different configurations. *Sci Total Environ* 590–591:233–241 . doi: 10.1016/j.scitotenv.2017.02.218
- de Vries W, Kros J, Dolman MA, et al (2015) Environmental impacts of innovative dairy farming systems aiming at improved internal nutrient cycling: A multi-scale assessment. *Sci Total Environ* 536:432–442 . doi: 10.1016/j.scitotenv.2015.07.079
- Dominguez S, Laso J, Margallo M, et al (2018) LCA of greywater management within a water circular economy restorative thinking framework. *Sci Total Environ* 621:1047–1056 . doi: 10.1016/j.scitotenv.2017.10.122
- Dong J, Tang Y, Nzihou A, et al (2018) Life cycle assessment of pyrolysis, gasification and incineration waste-to-energy technologies: Theoretical analysis and case study of commercial plants. *Sci Total Environ* 626:744–753 . doi: 10.1016/j.scitotenv.2018.01.151
- Falciglia PP, Ingrao C, De Guidi G, et al (2018) Environmental Life Cycle Assessment of marine sediment decontamination by citric acid enhanced-microwave heating. *Sci Total Environ* 619–620:72–82 . doi: 10.1016/j.scitotenv.2017.11.085

- García-Ceballos L, de Andrés-Díaz JR, Contreras-López MA (2018) Life cycle study of different constructive solutions for building enclosures. *Sci Total Environ* 626:1167–1174 . doi: 10.1016/j.scitotenv.2018.01.109
- Gu F, Guo J, Zhang W, et al (2017) From waste plastics to industrial raw materials: A life cycle assessment of mechanical plastic recycling practice based on a real-world case study. *Sci Total Environ* 601–602:1192–1207 . doi: 10.1016/j.scitotenv.2017.05.278
- Hansen AP, da Silva GA, Kulay L (2015) Evaluation of the environmental performance of alternatives for polystyrene production in Brazil. *Sci Total Environ* 532:655–668 . doi: 10.1016/j.scitotenv.2015.06.049
- Hoxha E, Jusselme T (2017) On the necessity of improving the environmental impacts of furniture and appliances in net-zero energy buildings. *Sci Total Environ* 596–597:405–416 . doi: 10.1016/j.scitotenv.2017.03.107
- Ingrao C, Lo Giudice A, Tricase C, et al (2014) Recycled-PET fibre based panels for building thermal insulation: Environmental impact and improvement potential assessment for a greener production. *Sci Total Environ* 493:914–929 . doi: 10.1016/j.scitotenv.2014.06.022
- Ioannou-Ttofa L, Foteinis S, Chatzisyneon E, Fatta-Kassinou D (2016) The environmental footprint of a membrane bioreactor treatment process through Life Cycle Analysis. *Sci Total Environ* 568:306–318 . doi: 10.1016/j.scitotenv.2016.06.032
- Iriarte A, Almeida MG, Villalobos P (2014) Carbon footprint of premium quality export bananas: Case study in Ecuador, the world's largest exporter. *Sci Total Environ* 472:1082–1088 . doi: 10.1016/j.scitotenv.2013.11.072
- Jeong ST, Kim GW, Hwang HY, et al (2018) Beneficial effect of compost utilization on reducing greenhouse gas emissions in a rice cultivation system through the overall management chain. *Sci Total Environ* 613–614:115–122 . doi: 10.1016/j.scitotenv.2017.09.001
- Klein D, Wolf C, Schulz C, Weber-Blaschke G (2016) Environmental impacts of various biomass supply chains for the provision of raw wood in Bavaria, Germany, with focus on climate change. *Sci Total Environ* 539:45–60 . doi: 10.1016/j.scitotenv.2015.08.087
- Laso J, Margallo M, Fullana P, et al (2017) When product diversification influences life cycle impact assessment: A case study of canned anchovy. *Sci Total Environ* 581–582:629–639 . doi: 10.1016/j.scitotenv.2016.12.173
- Lin CC, Lin JY, Lee M, Chiueh P Te (2017) Sector-wise midpoint characterization factors for impact assessment of regional consumptive and degradative water use. *Sci Total Environ* 607–608:786–794 . doi: 10.1016/j.scitotenv.2017.07.026
- Liu L, Xu X, Hu Y, et al (2018) Efficiency analysis of bioenergy potential on winter fallow fields: A case study of rape. *Sci Total Environ* 628–629:103–109 . doi: 10.1016/j.scitotenv.2018.02.016
- López-Sabirón AM, Aranda-Usón A, Mainar-Toledo MD, et al (2014) Environmental profile of latent energy storage materials applied to industrial systems. *Sci Total Environ* 473–474:565–575 . doi: 10.1016/j.scitotenv.2013.12.013
- Manso M, Castro-Gomes J, Paulo B, et al (2018) Life cycle analysis of a new modular greening system. *Sci Total Environ* 627:1146–1153 . doi: 10.1016/j.scitotenv.2018.01.198
- Martín-Gamboa M, Iribarren D, Dufour J (2018) Environmental impact efficiency of natural gas combined cycle power plants: A combined life cycle assessment and dynamic data envelopment analysis approach. *Sci Total Environ* 615:29–37 . doi: 10.1016/j.scitotenv.2017.09.243
- Miglietta PP, Morrone D, Lamastra L (2018) Water footprint and economic water productivity of Italian wines with appellation of origin: Managing sustainability through an integrated approach. *Sci Total Environ* 633:1280–1286 . doi: 10.1016/j.scitotenv.2018.03.270
- Nabavi-Pelesaraei A, Rafiee S, Mohtasebi SS, et al (2018) Integration of artificial intelligence methods and life cycle assessment to predict energy output and environmental impacts of paddy production. *Sci Total Environ* 631–632:1279–1294 . doi: 10.1016/j.scitotenv.2018.03.088
- Naughton CC, Zhang Q, Mihelcic JR (2017) Modelling energy and environmental impacts of traditional and improved shea butter production in West Africa for food security. *Sci Total Environ* 576:284–291 . doi: 10.1016/j.scitotenv.2016.10.059

- Papadaki D, Foteinis S, Mhlongo GH, et al (2017) Life cycle assessment of facile microwave-assisted zinc oxide (ZnO) nanostructures. *Sci Total Environ* 586:566–575 . doi: 10.1016/j.scitotenv.2017.02.019
- Parajuli R, Knudsen MT, Djomo SN, et al (2017) Environmental life cycle assessment of producing willow, alfalfa and straw from spring barley as feedstocks for bioenergy or biorefinery systems. *Sci Total Environ* 586:226–240 . doi: 10.1016/j.scitotenv.2017.01.207
- Patrizi N, Niccolucci V, Castellini C, et al (2018) Sustainability of agro-livestock integration: Implications and results of Emery evaluation. *Sci Total Environ* 622–623:1543–1552 . doi: 10.1016/j.scitotenv.2017.10.029
- Pellicer-Martínez F, Martínez-Paz JM (2016) The Water Footprint as an indicator of environmental sustainability in water use at the river basin level. *Sci Total Environ* 571:561–574 . doi: 10.1016/j.scitotenv.2016.07.022
- Pérez-López P, González-García S, Allewaert C, et al (2014) Environmental evaluation of eicosapentaenoic acid production by *Phaeodactylum tricornutum*. *Sci Total Environ* 466–467:991–1002 . doi: 10.1016/j.scitotenv.2013.07.105
- Pérez-López P, Jeffryes C, Agathos SN, et al (2016) Environmental life cycle optimization of essential terpene oils produced by the macroalga *Ochtodes secundiramea*. *Sci Total Environ* 542:292–305 . doi: 10.1016/j.scitotenv.2015.10.045
- Pérez Neira D, Soler Montiel M, Delgado Cabeza M, Reigada A (2018) Energy use and carbon footprint of the tomato production in heated multi-tunnel greenhouses in Almeria within an exporting agri-food system context. *Sci Total Environ* 628–629:1627–1636 . doi: 10.1016/j.scitotenv.2018.02.127
- Petit-Boix A, Devkota J, Phillips R, et al (2018) Life cycle and hydrologic modeling of rainwater harvesting in urban neighborhoods: Implications of urban form and water demand patterns in the US and Spain. *Sci Total Environ* 621:434–443 . doi: 10.1016/j.scitotenv.2017.11.206
- Piekarski CM, de Francisco AC, da Luz LM, et al (2017) Life cycle assessment of medium-density fiberboard (MDF) manufacturing process in Brazil. *Sci Total Environ* 575:103–111 . doi: 10.1016/j.scitotenv.2016.10.007
- Pirlo G, Carè S, Casa G Della, et al (2016) Environmental impact of heavy pig production in a sample of Italian farms. A cradle to farm-gate analysis. *Sci Total Environ* 565:576–585 . doi: 10.1016/j.scitotenv.2016.04.174
- Puig R, Kiliç E, Navarro A, et al (2017) Inventory analysis and carbon footprint of coastland-hotel services: A Spanish case study. *Sci Total Environ* 595:244–254 . doi: 10.1016/j.scitotenv.2017.03.245
- Rebolledo-Leiva R, Angulo-Meza L, Iriarte A, González-Araya MC (2017) Joint carbon footprint assessment and data envelopment analysis for the reduction of greenhouse gas emissions in agriculture production. *Sci Total Environ* 593–594:36–46 . doi: 10.1016/j.scitotenv.2017.03.147
- Recanati F, Marveggio D, Dotelli G (2018) From beans to bar: A life cycle assessment towards sustainable chocolate supply chain. *Sci Total Environ* 613–614:1013–1023 . doi: 10.1016/j.scitotenv.2017.09.187
- Ribera G, Clarens F, Martínez-Lladó X, et al (2014) Life cycle and human health risk assessments as tools for decision making in the design and implementation of nanofiltration in drinking water treatment plants. *Sci Total Environ* 466–467:377–386 . doi: 10.1016/j.scitotenv.2013.06.085
- Rodriguez-Garcia G, Frison N, Vázquez-Padín JR, et al (2014) Life cycle assessment of nutrient removal technologies for the treatment of anaerobic digestion supernatant and its integration in a wastewater treatment plant. *Sci Total Environ* 490:871–879 . doi: 10.1016/j.scitotenv.2014.05.077
- Rodriguez-Verde I, Regueiro L, Carballa M, et al (2014) Assessing anaerobic co-digestion of pig manure with agroindustrial wastes: The link between environmental impacts and operational parameters. *Sci Total Environ* 497–498:475–483 . doi: 10.1016/j.scitotenv.2014.07.127
- Schmidt Rivera XC, Bacenetti J, Fusi A, Niero M (2017) The influence of fertiliser and pesticide emissions model on life cycle assessment of agricultural products: The case of Danish and Italian barley. *Sci Total Environ* 592:745–757 . doi: 10.1016/j.scitotenv.2016.11.183
- Sfez S, De Meester S, Dewulf J (2017) Co-digestion of rice straw and cow dung to supply cooking fuel and fertilizers in rural India: Impact on human health, resource flows and climate change. *Sci Total Environ* 609:1600–1615 . doi: 10.1016/j.scitotenv.2017.07.150

- Shahabi MP, McHugh A, Anda M, Ho G (2017) A framework for planning sustainable seawater desalination water supply. *Sci Total Environ* 575:826–835 . doi: 10.1016/j.scitotenv.2016.09.136
- Stoessel F, Sonderegger T, Bayer P, Hellweg S (2018) Assessing the environmental impacts of soil compaction in Life Cycle Assessment. *Sci Total Environ* 630:913–921 . doi: 10.1016/j.scitotenv.2018.02.222
- Suttayakul P, H-Kittikun A, Suksaroj C, et al (2016) Water footprints of products of oil palm plantations and palm oil mills in Thailand. *Sci Total Environ* 542:521–529 . doi: 10.1016/j.scitotenv.2015.10.060
- Tecco N, Baudino C, Girgenti V, Peano C (2016) Innovation strategies in a fruit growers association impacts assessment by using combined LCA and s-LCA methodologies. *Sci Total Environ* 568:253–262 . doi: 10.1016/j.scitotenv.2016.05.203
- Uctug FG, Azapagic A (2018) Life cycle environmental impacts of domestic solar water heaters in Turkey: The effect of different climatic regions. *Sci Total Environ* 622–623:1202–1216 . doi: 10.1016/j.scitotenv.2017.12.057
- Venanzi S, Pezzolla D, Cecchini L, et al (2018) Use of agricultural by-products in the development of an agro-energy chain: A case study from the Umbria region. *Sci Total Environ* 627:494–505 . doi: 10.1016/j.scitotenv.2018.01.176
- Vida E, Tedesco DEA (2017) The carbon footprint of integrated milk production and renewable energy systems – A case study. *Sci Total Environ* 609:1286–1294 . doi: 10.1016/j.scitotenv.2017.07.271
- Wen Z, Bai W, Zhang W, et al (2018) Environmental impact analysis of nitrogen cross-media metabolism: A case study of municipal solid waste treatment system in China. *Sci Total Environ* 618:810–818 . doi: 10.1016/j.scitotenv.2017.08.213
- Yan Y (2018) Integrate carbon dynamic models in analyzing carbon sequestration impact of forest biomass harvest. *Sci Total Environ* 615:581–587 . doi: 10.1016/j.scitotenv.2017.09.326
- Yasutaka T, Zhang H, Murayama K, et al (2016) Development of a green remediation tool in Japan. *Sci Total Environ* 563–564:813–821 . doi: 10.1016/j.scitotenv.2016.01.018

## **5.2 Consequential life cycle assessment studies**

### **5.2.1 Uncertainty analysis performed**

#### **5.2.1a Monte Carlo-like approaches**

None.

#### **5.2.1b Probabilistic (other than Monte Carlo)**

Styles D, Dominguez EM, Chadwick D (2016) Environmental balance of the of the UK biogas sector: An evaluation by consequential life cycle assessment. *Sci Total Environ* 560–561:241–253 . doi: 10.1016/j.scitotenv.2016.03.236

#### **5.2.1c Taylor series**

None.

#### **5.2.1d Scenario analysis**

None.

#### **5.2.1e Qualitative/pedigree**

None.

#### **5.2.1f Sensitivity analysis**

None.

#### **5.2.1g Fuzzy logic**

None.

#### **5.2.1h Bayesian**

None.

### **5.2.1i Regression**

None.

### **5.2.1j Not indicated/other**

None.

### **5.2.2 Uncertainty analysis reported as not performed**

None.

### **5.2.3 Uncertainty mentioned but no analysis performed**

Hanserud OS, Cherubini F, Øgaard AF, et al (2018) Choice of mineral fertilizer substitution principle strongly influences LCA environmental benefits of nutrient cycling in the agri-food system. *Sci Total Environ* 615:219–227 . doi: 10.1016/j.scitotenv.2017.09.215

Mekonnen MM, Gerbens-Leenes PW, Hoekstra AY (2016) Future electricity: The challenge of reducing both carbon and water footprint. *Sci Total Environ* 569–570:1282–1288 . doi: 10.1016/j.scitotenv.2016.06.204

Morales-Pinzón T, Lurueña R, Gabarrell X, et al (2014) Financial and environmental modelling of water hardness - Implications for utilising harvested rainwater in washing machines. *Sci Total Environ* 470–471:1257–1271 . doi: 10.1016/j.scitotenv.2013.10.101

Parajuli R, Dalgaard T, Birkved M (2018) Can farmers mitigate environmental impacts through combined production of food, fuel and feed? A consequential life cycle assessment of integrated mixed crop-livestock system with a green biorefinery. *Sci Total Environ* 619–620:127–143 . doi: 10.1016/j.scitotenv.2017.11.082

Spångberg J, Tidåker P, Jönsson H (2014) Environmental impact of recycling nutrients in human excreta to agriculture compared with enhanced wastewater treatment. *Sci Total Environ* 493:209–219 . doi: 10.1016/j.scitotenv.2014.05.123

Vázquez-Rowe I, Marvuglia A, Rege S, Benetto E (2014) Applying consequential LCA to support energy policy: Land use change effects of bioenergy production. *Sci Total Environ* 472:78–89 . doi: 10.1016/j.scitotenv.2013.10.097

### **5.2.4 No mention of uncertainty**

Girgenti V, Peano C, Baudino C, Tecco N (2014) From “farm to fork” strawberry system: Current realities and potential innovative scenarios from life cycle assessment of non-renewable energy use and green house gas emissions. *Sci Total Environ* 473–474:48–53 . doi: 10.1016/j.scitotenv.2013.11.133

Wolf C, Klein D, Richter K, Weber-Blaschke G (2016) Mitigating environmental impacts through the energetic use of wood: Regional displacement factors generated by means of substituting non-wood heating systems. *Sci Total Environ* 569–570:395–403 . doi: 10.1016/j.scitotenv.2016.06.021

## **5.3 Combination attributional and consequential life cycle assessment studies**

### **5.3.1 Uncertainty analysis performed**

#### **5.3.1a Monte Carlo-like approaches**

None.

#### **5.3.1b Probabilistic (other than Monte Carlo)**

None.

#### **5.3.1c Taylor series**

None.

#### **5.3.1d Scenario analysis**

None.

### **5.3.1e Qualitative/pedigree**

None.

### **5.3.1f Sensitivity analysis**

None.

### **5.3.1g Fuzzy logic**

None.

### **5.3.1h Bayesian**

None.

### **5.3.1i Regression**

None.

### **5.3.1j Not indicated/other**

None.

## **5.3.2 Uncertainty analysis reported as not performed**

None.

## **5.3.3 Uncertainty mentioned but no analysis performed**

Parajuli R, Knudsen MT, Birkved M, et al (2017) Environmental impacts of producing bioethanol and biobased lactic acid from standalone and integrated biorefineries using a consequential and an attributional life cycle assessment approach. *Sci Total Environ* 598:497–512 . doi: 10.1016/j.scitotenv.2017.04.087

Ruiz D, San Miguel G, Corona B, et al (2018) Environmental and economic analysis of power generation in a thermophilic biogas plant. *Sci Total Environ* 633:1418–1428 . doi: 10.1016/j.scitotenv.2018.03.169

## **5.3.4 No mention of uncertainty**

Arashiro LT, Montero N, Ferrer I, et al (2018) Life cycle assessment of high rate algal ponds for wastewater treatment and resource recovery. *Sci Total Environ* 622–623:1118–1130 . doi: 10.1016/j.scitotenv.2017.12.051

## **6. Resources, Conservation and Recycling**

### **6.1 Attributional life cycle assessment studies**

#### **6.1.1 Uncertainty analysis performed**

##### **6.1.1a Monte Carlo-like approaches**

Bicer Y, Dincer I (2018) Life cycle environmental impact assessments and comparisons of alternative fuels for clean vehicles. *Resour Conserv Recycl* 132:141–157 . doi: 10.1016/j.resconrec.2018.01.036

Cai Y, Yue W, Xu L, et al (2016) Sustainable urban water resources management considering life-cycle environmental impacts of water utilization under uncertainty. *Resour Conserv Recycl* 108:21–40 . doi: 10.1016/j.resconrec.2016.01.008

Caldeira C, Queirós J, Noshadravan A, Freire F (2016) Incorporating uncertainty in the life cycle assessment of biodiesel from waste cooking oil addressing different collection systems. *Resour Conserv Recycl* 112:83–92 . doi: 10.1016/j.resconrec.2016.05.005

Ferrão P, Ribeiro P, Rodrigues J, et al (2014) Environmental, economic and social costs and benefits of a packaging waste management system: A Portuguese case study. *Resour Conserv Recycl* 85:67–78 . doi: 10.1016/j.resconrec.2013.10.020

- Galvez-Martos JL, Morrison J, Jauffret G, et al (2016) Environmental assessment of aqueous alkaline absorption of carbon dioxide and its use to produce a construction material. *Resour Conserv Recycl* 107:129–141 . doi: 10.1016/j.resconrec.2015.12.008
- Giani MI, Dotelli G, Brandini N, Zampori L (2015) Comparative life cycle assessment of asphalt pavements using reclaimed asphalt, warm mix technology and cold in-place recycling. *Resour Conserv Recycl* 104:224–238 . doi: 10.1016/j.resconrec.2015.08.006
- Grimaud G, Perry N, Laratte B (2018) Aluminium cables recycling process: Environmental impacts identification and reduction. *Resour Conserv Recycl* 135:150–162 . doi: 10.1016/j.resconrec.2017.11.010
- Kang DH, Auras R, Singh J (2017) Life cycle assessment of non-alcoholic single-serve polyethylene terephthalate beverage bottles in the state of California. *Resour Conserv Recycl* 116:45–52 . doi: 10.1016/j.resconrec.2016.09.011
- Khang DS, Tan RR, Uy OM, et al (2017) Design of experiments for global sensitivity analysis in life cycle assessment: The case of biodiesel in Vietnam. *Resour Conserv Recycl* 119:12–23 . doi: 10.1016/j.resconrec.2016.08.016
- Loss A, Toniolo S, Mazzi A, et al (2018) LCA comparison of traditional open cut and pipe bursting systems for relining water pipelines. *Resour Conserv Recycl* 128:458–469 . doi: 10.1016/j.resconrec.2016.08.001
- Miller SA, Srubar W V., Billington SL, Lepech MD (2015) Integrating durability-based service-life predictions with environmental impact assessments of natural fiber-reinforced composite materials. *Resour Conserv Recycl* 99:72–83 . doi: 10.1016/j.resconrec.2015.04.004
- Niero M, Olsen SI (2016) Circular economy: To be or not to be in a closed product loop? A Life Cycle Assessment of aluminium cans with inclusion of alloying elements. *Resour Conserv Recycl* 114:18–31 . doi: 10.1016/j.resconrec.2016.06.023
- Pegoretti TDS, Mathieux F, Evrard D, et al (2014) Use of recycled natural fibres in industrial products: A comparative LCA case study on acoustic components in the Brazilian automotive sector. *Resour Conserv Recycl* 84:1–14 . doi: 10.1016/j.resconrec.2013.12.010
- Toniolo S, Mazzi A, Garato VG, et al (2014) Assessing the “design paradox” with life cycle assessment: A case study of a municipal solid waste incineration plant. *Resour Conserv Recycl* 91:109–116 . doi: 10.1016/j.resconrec.2014.08.001
- Vandermeersch T, Alvarenga RAF, Ragaert P, Dewulf J (2014) Environmental sustainability assessment of food waste valorization options. *Resour Conserv Recycl* 87:57–64 . doi: 10.1016/j.resconrec.2014.03.008
- Vialle C, Busset G, Tanfin L, et al (2015) Environmental analysis of a domestic rainwater harvesting system: A case study in France. *Resour Conserv Recycl* 102:178–184 . doi: 10.1016/j.resconrec.2015.07.024
- Vossberg C, Mason-Jones K, Cohen B (2014) An energetic life cycle assessment of C&D waste and container glass recycling in Cape Town, South Africa. *Resour Conserv Recycl* 88:39–49 . doi: 10.1016/j.resconrec.2014.04.009

### **6.1.1b Probabilistic (other than Monte Carlo)**

- Thibodeau C, Monette F, Glaus M (2014) Comparison of development scenarios of a black water source-separation sanitation system using life cycle assessment and environmental life cycle costing. *Resour Conserv Recycl* 92:38–54 . doi: 10.1016/j.resconrec.2014.08.004

### **6.1.1c Taylor series**

None.

### **6.1.1d Scenario analysis**

- Luo P, Yang Y, Wang H, et al (2018) Water footprint and scenario analysis in the transformation of Chongming into an international eco-island. *Resour Conserv Recycl* 132:376–385 . doi: 10.1016/j.resconrec.2017.07.026
- Santos J, Flintsch G, Ferreira A (2017) Environmental and economic assessment of pavement construction and management practices for enhancing pavement sustainability. *Resour Conserv Recycl* 116:15–31 . doi: 10.1016/j.resconrec.2016.08.025



- Stotz PM, Niero M, Bey N, Paraskevas D (2017) Environmental screening of novel technologies to increase material circularity: A case study on aluminium cans. *Resour Conserv Recycl* 127:96–106 . doi: 10.1016/j.resconrec.2017.07.013
- Xu L, Pang M, Zhang L, et al (2018) Life cycle assessment of onshore wind power systems in China. *Resour Conserv Recycl* 132:361–368 . doi: 10.1016/j.resconrec.2017.06.014
- Zhao Y, Deng W (2014) Environmental impacts of different food waste resource technologies and the effects of energy mix. *Resour Conserv Recycl* 92:214–221 . doi: 10.1016/j.resconrec.2014.07.005

#### **6.1.1e Qualitative/pedigree**

None.

#### **6.1.1f Sensitivity analysis**

- Broeren MLM, Kuling L, Worrell E, Shen L (2017) Environmental impact assessment of six starch plastics focusing on wastewater-derived starch and additives. *Resour Conserv Recycl* 127:246–255 . doi: 10.1016/j.resconrec.2017.09.001
- Chiew YL, Spångberg J, Baky A, et al (2015) Environmental impact of recycling digested food waste as a fertilizer in agriculture - A case study. *Resour Conserv Recycl* 95:1–14 . doi: 10.1016/j.resconrec.2014.11.015
- Dong D, Duan H, Mao R, et al (2018) Towards a low carbon transition of urban public transport in megacities: A case study of Shenzhen, China. *Resour Conserv Recycl* 134:149–155 . doi: 10.1016/j.resconrec.2018.03.011
- Hossain MU, Poon CS, Lo IMC, Cheng JCP (2017) Comparative LCA on using waste materials in the cement industry: A Hong Kong case study. *Resour Conserv Recycl* 120:199–208 . doi: 10.1016/j.resconrec.2016.12.012
- Maalouf A, El-Fadel M (2018) Carbon footprint of integrated waste management systems with implications of food waste diversion into the wastewater stream. *Resour Conserv Recycl* 133:263–277 . doi: 10.1016/j.resconrec.2018.02.021
- Xiao L, Liu W, Guo Q, et al (2018) Comparative life cycle assessment of manufactured and remanufactured loading machines in China. *Resour Conserv Recycl* 131:225–234 . doi: 10.1016/j.resconrec.2017.12.021

#### **6.1.1g Fuzzy logic**

- Cai Y, Yue W, Xu L, et al (2016) Sustainable urban water resources management considering life-cycle environmental impacts of water utilization under uncertainty. *Resour Conserv Recycl* 108:21–40 . doi: 10.1016/j.resconrec.2016.01.008

#### **6.1.1h Bayesian**

None.

#### **6.1.1i Regression**

None.

#### **6.1.1j Not indicated/other**

- Hao H, Qiao Q, Liu Z, Zhao F (2017) Impact of recycling on energy consumption and greenhouse gas emissions from electric vehicle production: The China 2025 case. *Resour Conserv Recycl* 122:114–125 . doi: 10.1016/j.resconrec.2017.02.005
- Hauck M, Maalcke-Luesken FA, Jetten MSM, Huijbregts MAJ (2016) Removing nitrogen from wastewater with side stream anammox: What are the trade-offs between environmental impacts? *Resour Conserv Recycl* 107:212–219 . doi: 10.1016/j.resconrec.2015.11.019
- Poinot T, Laracy ME, Aponte C, et al (2018) Beneficial use of boiler ash in alkali-activated bricks. *Resour Conserv Recycl* 128:1–10 . doi: 10.1016/j.resconrec.2017.09.013

### **6.1.2 Uncertainty analysis reported as not performed**

- Corbala-Robles L, Sastafiana WND, Van linden V, et al (2018) Life cycle assessment of biological pig manure treatment versus direct land application – a trade-off story. *Resour Conserv Recycl* 131:86–98 . doi: 10.1016/j.resconrec.2017.12.010
- Kleijer AL, Lasvaux S, Citherlet S, Viviani M (2017) Product-specific Life Cycle Assessment of ready mix concrete: Comparison between a recycled and an ordinary concrete. *Resour Conserv Recycl* 122:210–218 . doi: 10.1016/j.resconrec.2017.02.004
- Mastrucci A, Marvuglia A, Popovici E, et al (2017) Geospatial characterization of building material stocks for the life cycle assessment of end-of-life scenarios at the urban scale. *Resour Conserv Recycl* 123:54–66 . doi: 10.1016/j.resconrec.2016.07.003
- Meylan G, Ami H, Spoerri A (2014) Transitions of municipal solid waste management. Part II: Hybrid life cycle assessment of Swiss glass-packaging disposal. *Resour Conserv Recycl* 86:16–27 . doi: 10.1016/j.resconrec.2014.01.005
- Turner DA, Williams ID, Kemp S (2015) Greenhouse gas emission factors for recycling of source-segregated waste materials. *Resour Conserv Recycl* 105:186–197 . doi: 10.1016/j.resconrec.2015.10.026
- Vadenbo C, Guillén-Gosálbez G, Saner D, Hellweg S (2014) Multi-objective optimization of waste and resource management in industrial networks - Part II: Model application to the treatment of sewage sludge. *Resour Conserv Recycl* 89:41–51 . doi: 10.1016/j.resconrec.2014.05.009

### **6.1.3 Uncertainty mentioned but no analysis performed**

- Amann A, Zoboli O, Krampe J, et al (2018) Environmental impacts of phosphorus recovery from municipal wastewater. *Resour Conserv Recycl* 130:127–139 . doi: 10.1016/j.resconrec.2017.11.002
- An J, Xue X (2017) Life-cycle carbon footprint analysis of magnesia products. *Resour Conserv Recycl* 119:4–11 . doi: 10.1016/j.resconrec.2016.09.023
- Bayus J, Ge C, Thom B (2016) A preliminary environmental assessment of foil and metallized film centered laminates. *Resour Conserv Recycl* 115:31–41 . doi: 10.1016/j.resconrec.2016.08.024
- Carlsson M, Naroznova I, Moller J, et al (2015) Importance of food waste pre-treatment efficiency for global warming potential in life cycle assessment of anaerobic digestion systems. *Resour Conserv Recycl* 102:58–66 . doi: 10.1016/j.resconrec.2015.06.012
- Chen W, Wu F, Geng W, Yu G (2017) Carbon emissions in China's industrial sectors. *Resour Conserv Recycl* 117:264–273 . doi: 10.1016/j.resconrec.2016.10.008
- Choi JK, Kelley D, Murphy S, Thangamani D (2016) Economic and environmental perspectives of end-of-life ship management. *Resour Conserv Recycl* 107:82–91 . doi: 10.1016/j.resconrec.2015.12.007
- Eriksson M, Strid I, Hansson PA (2016) Food waste reduction in supermarkets - Net costs and benefits of reduced storage temperature. *Resour Conserv Recycl* 107:73–81 . doi: 10.1016/j.resconrec.2015.11.022
- González-García S, Baucells F, Feijoo G, Moreira MT (2016) Environmental performance of sorghum, barley and oat silage production for livestock feed using life cycle assessment. *Resour Conserv Recycl* 111:28–41 . doi: 10.1016/j.resconrec.2016.04.002
- He L, Chen Y, Li J (2018) A three-level framework for balancing the tradeoffs among the energy, water, and air-emission implications within the life-cycle shale gas supply chains. *Resour Conserv Recycl* 133:206–228 . doi: 10.1016/j.resconrec.2018.02.015
- Hernandez M, Messagie M, De Gennaro M, Van Mierlo J (2017) Resource depletion in an electric vehicle powertrain using different LCA impact methods. *Resour Conserv Recycl* 120:119–130 . doi: 10.1016/j.resconrec.2016.11.005
- Ivner J, Broberg Viklund S (2015) Effect of the use of industrial excess heat in district heating on greenhouse gas emissions: A systems perspective. *Resour Conserv Recycl* 100:81–87 . doi: 10.1016/j.resconrec.2015.04.010
- Krystofik M, Luccitti A, Parnell K, Thurston M (2018) Adaptive remanufacturing for multiple lifecycles: A case study in office furniture. *Resour Conserv Recycl* 135:14–23 . doi: 10.1016/j.resconrec.2017.07.028

- Laso J, García-Herrero I, Margallo M, et al (2018) Finding an economic and environmental balance in value chains based on circular economy thinking: An eco-efficiency methodology applied to the fish canning industry. *Resour Conserv Recycl* 133:428–437 . doi: 10.1016/j.resconrec.2018.02.004
- Lausset C, Cherubini F, Oreggioni GD, et al (2017) Norwegian Waste-to-Energy: Climate change, circular economy and carbon capture and storage. *Resour Conserv Recycl* 126:50–61 . doi: 10.1016/j.resconrec.2017.07.025
- Nhu TT, Le QH, Heide P, et al (2016) Inferred equations for predicting cumulative exergy extraction throughout cradle-to-gate life cycles of *Pangasius* feeds and intensive *Pangasius* grow-out farms in Vietnam. *Resour Conserv Recycl* 115:42–49 . doi: 10.1016/j.resconrec.2016.08.023
- Risse M, Weber-Blaschke G, Richter K (2017) Resource efficiency of multifunctional wood cascade chains using LCA and exergy analysis, exemplified by a case study for Germany. *Resour Conserv Recycl* 126:141–152 . doi: 10.1016/j.resconrec.2017.07.045
- Saade MRM, Silva MG Da, Gomes V (2015) Appropriateness of environmental impact distribution methods to model blast furnace slag recycling in cement making. *Resour Conserv Recycl* 99:40–47 . doi: 10.1016/j.resconrec.2015.03.011
- Scholz K, Eriksson M, Strid I (2015) Carbon footprint of supermarket food waste. *Resour Conserv Recycl* 94:56–65 . doi: 10.1016/j.resconrec.2014.11.016
- Song X, Zhang C, Yuan W, Yang D (2018) Life-cycle energy use and GHG emissions of waste television treatment system in China. *Resour Conserv Recycl* 128:470–478 . doi: 10.1016/j.resconrec.2016.09.004
- Suárez Silgado S, Calderón Valdiviezo L, Gassó Domingo S, Roca X (2018) Multi-criteria decision analysis to assess the environmental and economic performance of using recycled gypsum cement and recycled aggregate to produce concrete: The case of Catalonia (Spain). *Resour Conserv Recycl* 133:120–131 . doi: 10.1016/j.resconrec.2017.11.023
- Togarcheti SC, Mediboyina M kumar, Chauhan VS, et al (2017) Life cycle assessment of microalgae based biodiesel production to evaluate the impact of biomass productivity and energy source. *Resour Conserv Recycl* 122:286–294 . doi: 10.1016/j.resconrec.2017.01.008
- Toniolo S, Mazzi A, Pieretto C, Scipioni A (2017) Allocation strategies in comparative life cycle assessment for recycling: Considerations from case studies. *Resour Conserv Recycl* 117:249–261 . doi: 10.1016/j.resconrec.2016.10.011
- Tran HP, Schaubroeck T, Swart P, et al (2018) Recycling portable alkaline/ZnC batteries for a circular economy: An assessment of natural resource consumption from a life cycle and criticality perspective. *Resour Conserv Recycl* 135:265–278 . doi: 10.1016/j.resconrec.2017.08.018
- Vahidi E, Navarro J, Zhao F (2016) An initial life cycle assessment of rare earth oxides production from ion-adsorption clays. *Resour Conserv Recycl* 113:1–11 . doi: 10.1016/j.resconrec.2016.05.006
- Van Eygen E, De Meester S, Tran HP, Dewulf J (2016) Resource savings by urban mining: The case of desktop and laptop computers in Belgium. *Resour Conserv Recycl* 107:53–64 . doi: 10.1016/j.resconrec.2015.10.032
- Yildiz-Geyhan E, Yilan-Çiftçi G, Altun-Çiftçioğlu GA, Neşet Kadirgan MA (2016) Environmental analysis of different packaging waste collection systems for Istanbul - Turkey case study. *Resour Conserv Recycl* 107:27–37 . doi: 10.1016/j.resconrec.2015.11.013
- Zapp P, Marx J, Schreiber A, et al (2018) Comparison of dysprosium production from different resources by life cycle assessment. *Resour Conserv Recycl* 130:248–259 . doi: 10.1016/j.resconrec.2017.12.006
- Zhao W, Yu H, Liang S, et al (2018) Resource impacts of municipal solid waste treatment systems in Chinese cities based on hybrid life cycle assessment. *Resour Conserv Recycl* 130:215–225 . doi: 10.1016/j.resconrec.2017.12.004

#### **6.1.4 No mention of uncertainty**

- Ali M, Marvuglia A, Geng Y, et al (2018) Emergy based carbon footprinting of household solid waste management scenarios in Pakistan. *Resour Conserv Recycl* 131:283–296 . doi: 10.1016/j.resconrec.2017.10.011

- Anastasiou EK, Liapis A, Papayianni I (2015) Comparative life cycle assessment of concrete road pavements using industrial by-products as alternative materials. *Resour Conserv Recycl* 101:1–8 . doi: 10.1016/j.resconrec.2015.05.009
- Aurangzeb Q, Al-Qadi IL, Ozer H, Yang R (2014) Hybrid life cycle assessment for asphalt mixtures with high RAP content. *Resour Conserv Recycl* 83:77–86 . doi: 10.1016/j.resconrec.2013.12.004
- Bai X, Ren X, Khanna NZ, et al (2018) Comprehensive water footprint assessment of the dairy industry chain based on ISO 14046: A case study in China. *Resour Conserv Recycl* 132:369–375 . doi: 10.1016/j.resconrec.2017.07.021
- Bartzas G, Komnitsas K (2015) Life cycle assessment of ferronickel production in Greece. *Resour Conserv Recycl* 105:113–122 . doi: 10.1016/j.resconrec.2015.10.016
- Baydar G, Ciliz N, Mammadov A (2015) Life cycle assessment of cotton textile products in Turkey. *Resour Conserv Recycl* 104:213–223 . doi: 10.1016/j.resconrec.2015.08.007
- Botas JA, Moreno J, Espada JJ, et al (2017) Recycling of used lubricating oil: Evaluation of environmental and energy performance by LCA. *Resour Conserv Recycl* 125:315–323 . doi: 10.1016/j.resconrec.2017.07.010
- Brancoli P, Rousta K, Bolton K (2017) Life cycle assessment of supermarket food waste. *Resour Conserv Recycl* 118:39–46 . doi: 10.1016/j.resconrec.2016.11.024
- Cambero C, Hans Alexandre M, Sowlati T (2015) Life cycle greenhouse gas analysis of bioenergy generation alternatives using forest and wood residues in remote locations: A case study in British Columbia, Canada. *Resour Conserv Recycl* 105:59–72 . doi: 10.1016/j.resconrec.2015.10.014
- Choi T (2017) Environmental impact of voluntary extended producer responsibility: The case of carpet recycling. *Resour Conserv Recycl* 127:76–84 . doi: 10.1016/j.resconrec.2017.08.020
- Colón J, Cadena E, Colazo AB, et al (2015) Toward the implementation of new regional biowaste management plans: Environmental assessment of different waste management scenarios in Catalonia. *Resour Conserv Recycl* 95:143–155 . doi: 10.1016/j.resconrec.2014.12.012
- De Soete W, Boone L, Willemse F, et al (2014) Environmental resource footprinting of drug manufacturing: Effects of scale-up and tablet dosage. *Resour Conserv Recycl* 91:82–88 . doi: 10.1016/j.resconrec.2014.08.002
- Dente SMR, Aoki-Suzuki C, Tanaka D, Hashimoto S (2018) Revealing the life cycle greenhouse gas emissions of materials: The Japanese case. *Resour Conserv Recycl* 133:395–403 . doi: 10.1016/j.resconrec.2017.12.011
- Diener DL, Tillman AM (2015) Component end-of-life management: Exploring opportunities and related benefits of remanufacturing and functional recycling. *Resour Conserv Recycl* 102:80–93 . doi: 10.1016/j.resconrec.2015.06.006
- Ding N, Liu J, Yang J, Yang D (2017) Comparative life cycle assessment of regional electricity supplies in China. *Resour Conserv Recycl* 119:47–59 . doi: 10.1016/j.resconrec.2016.07.010
- Diyamandoglu V, Fortuna LM (2015) Deconstruction of wood-framed houses: Material recovery and environmental impact. *Resour Conserv Recycl* 100:21–30 . doi: 10.1016/j.resconrec.2015.04.006
- Dunuwila P, Rodrigo VHL, Goto N (2018) Sustainability of natural rubber processing can be improved: A case study with crepe rubber manufacturing in Sri Lanka. *Resour Conserv Recycl* 133:417–427 . doi: 10.1016/j.resconrec.2018.01.029
- Egilmez G, Kucukvar M, Tatari O, Bhutta MKS (2014) Supply chain sustainability assessment of the U.S. food manufacturing sectors: A life cycle-based frontier approach. *Resour Conserv Recycl* 82:8–20 . doi: 10.1016/j.resconrec.2013.10.008
- Esteve-Turrillas FA, de la Guardia M (2017) Environmental impact of Recover cotton in textile industry. *Resour Conserv Recycl* 116:107–115 . doi: 10.1016/j.resconrec.2016.09.034
- Farina A, Zanetti MC, Santagata E, Blengini GA (2017) Life cycle assessment applied to bituminous mixtures containing recycled materials: Crumb rubber and reclaimed asphalt pavement. *Resour Conserv Recycl* 117:204–212 . doi: 10.1016/j.resconrec.2016.10.015

- Gallagher J, Styles D, McNabola A, Williams AP (2015) Making green technology greener: Achieving a balance between carbon and resource savings through ecodesign in hydropower systems. *Resour Conserv Recycl* 105:11–17 . doi: 10.1016/j.resconrec.2015.10.015
- Goulart Coelho LM, Lange LC (2018) Applying life cycle assessment to support environmentally sustainable waste management strategies in Brazil. *Resour Conserv Recycl* 128:438–450 . doi: 10.1016/j.resconrec.2016.09.026
- Hengen TJ, Squillace MK, O’Sullivan AD, Stone JJ (2014) Life cycle assessment analysis of active and passive acid mine drainage treatment technologies. *Resour Conserv Recycl* 86:160–167 . doi: 10.1016/j.resconrec.2014.01.003
- Huang B, Zhao J, Geng Y, et al (2017a) Energy-related GHG emissions of the textile industry in China. *Resour Conserv Recycl* 119:69–77 . doi: 10.1016/j.resconrec.2016.06.013
- Huang TY, Chiueh PT, Lo SL (2017b) Life-cycle environmental and cost impacts of reusing fly ash. *Resour Conserv Recycl* 123:255–260 . doi: 10.1016/j.resconrec.2016.07.001
- Huerta AR, Güereca LP, Lozano MDLSR (2016) Environmental impact of beef production in Mexico through life cycle assessment. *Resour Conserv Recycl* 109:44–53 . doi: 10.1016/j.resconrec.2016.01.020
- Huysman S, Debaveye S, Schaubroeck T, et al (2015) The recyclability benefit rate of closed-loop and open-loop systems: A case study on plastic recycling in Flanders. *Resour Conserv Recycl* 101:53–60 . doi: 10.1016/j.resconrec.2015.05.014
- Jamali-Zghal N, Lacarrière B, Le Corre O, et al (2015) Metallurgical recycling processes: Sustainability ratios and environmental performance assessment. *Resour Conserv Recycl* 97:66–75 . doi: 10.1016/j.resconrec.2015.02.010
- Jiménez Rivero A, Sathre R, García Navarro J (2016) Life cycle energy and material flow implications of gypsum plasterboard recycling in the European Union. *Resour Conserv Recycl* 108:171–181 . doi: 10.1016/j.resconrec.2016.01.014
- Khoo HH, Wong LL, Tan J, et al (2015) Synthesis of 2-methyl tetrahydrofuran from various lignocellulosic feedstocks: Sustainability assessment via LCA. *Resour Conserv Recycl* 95:174–182 . doi: 10.1016/j.resconrec.2014.12.013
- Komakech AJ, Sundberg C, Jönsson H, Vinnerås B (2015) Life cycle assessment of biodegradable waste treatment systems for sub-Saharan African cities. *Resour Conserv Recycl* 99:100–110 . doi: 10.1016/j.resconrec.2015.03.006
- Kookos IK (2018) Technoeconomic and environmental assessment of a process for biodiesel production from spent coffee grounds (SCGs). *Resour Conserv Recycl* 134:156–164 . doi: 10.1016/j.resconrec.2018.02.002
- Kylili A, Ilic M, Fokaidis PA (2017) Whole-building Life Cycle Assessment (LCA) of a passive house of the sub-tropical climatic zone. *Resour Conserv Recycl* 116:169–177 . doi: 10.1016/j.resconrec.2016.10.010
- Leme MMV, Rocha MH, Lora EES, et al (2014) Techno-economic analysis and environmental impact assessment of energy recovery from Municipal Solid Waste (MSW) in Brazil. *Resour Conserv Recycl* 87:8–20 . doi: 10.1016/j.resconrec.2014.03.003
- Li H, Zhang W, Li Q, Chen B (2015) Updated CO<sub>2</sub> emission from Mg production by Pidgeon process: Implications for automotive application life cycle. *Resour Conserv Recycl* 100:41–48 . doi: 10.1016/j.resconrec.2015.04.008
- Li Y, He Q, Luo X, et al (2018) Calculation of life-cycle greenhouse gas emissions of urban rail transit systems: A case study of Shanghai Metro. *Resour Conserv Recycl* 128:451–457 . doi: 10.1016/j.resconrec.2016.03.007
- Liang Y, Su J, Xi B, et al (2017) Life cycle assessment of lithium-ion batteries for greenhouse gas emissions. *Resour Conserv Recycl* 117:285–293 . doi: 10.1016/j.resconrec.2016.08.028
- Lopes Silva DA, De Oliveira JA, Saavedra YMB, et al (2015) Combined MFA and LCA approach to evaluate the metabolism of service polygons: A case study on a university campus. *Resour Conserv Recycl* 94:157–168 . doi: 10.1016/j.resconrec.2014.11.001

- Magnusson S, Mácsik J (2017) Analysis of energy use and emissions of greenhouse gases, metals and organic substances from construction materials used for artificial turf. *Resour Conserv Recycl* 122:362–372 . doi: 10.1016/j.resconrec.2017.03.007
- Maheshi D, Steven VP, Karel VA (2015) Environmental and economic assessment of “open waste dump” mining in Sri Lanka. *Resour Conserv Recycl* 102:67–79 . doi: 10.1016/j.resconrec.2015.07.004
- Manda BMK, Worrell E, Patel MK (2015) Prospective life cycle assessment of an antibacterial T-shirt and supporting business decisions to create value. *Resour Conserv Recycl* 103:47–57 . doi: 10.1016/j.resconrec.2015.07.010
- Margallo M, Dominguez-ramos A, Aldaco R, et al (2014) Resources , Conservation and Recycling Environmental sustainability assessment in the process industry : A case study of waste-to-energy plants in Spain. *Resour Conserv Recycl* 93:144–155 . doi: <http://dx.doi.org/10.1016/j.resconrec.2014.09.014>
- Marrero M, Puerto M, Rivero-Camacho C, et al (2017) Assessing the economic impact and ecological footprint of construction and demolition waste during the urbanization of rural land. *Resour Conserv Recycl* 117:160–174 . doi: 10.1016/j.resconrec.2016.10.020
- Nhu TT, Dewulf J, Serruys P, et al (2015) Resource usage of integrated Pig-Biogas-Fish system: Partitioning and substitution within attributional life cycle assessment. *Resour Conserv Recycl* 102:27–38 . doi: 10.1016/j.resconrec.2015.06.011
- Panepinto D, Blengini GA, Genon G (2015) Economic and environmental comparison between two scenarios of waste management: MBT vs thermal treatment. *Resour Conserv Recycl* 97:16–23 . doi: 10.1016/j.resconrec.2015.02.002
- Peñarrubia Fernandez IA, Liu DH, Zhao J (2017) LCA studies comparing alkaline and immobilized enzyme catalyst processes for biodiesel production under Brazilian conditions. *Resour Conserv Recycl* 119:117–127 . doi: 10.1016/j.resconrec.2016.05.009
- Prouty C, Zhang Q (2016) How do people’s perceptions of water quality influence the life cycle environmental impacts of drinking water in Uganda? *Resour Conserv Recycl* 109:24–33 . doi: 10.1016/j.resconrec.2016.01.019
- Qi Z, Gao C, Na H, Ye Z (2018) Using forest area for carbon footprint analysis of typical steel enterprises in China. *Resour Conserv Recycl* 132:352–360 . doi: 10.1016/j.resconrec.2017.05.016
- Quirós R, Villalba G, Muñoz P, et al (2014) Environmental assessment of two home composts with high and low gaseous emissions of the composting process. *Resour Conserv Recycl* 90:9–20 . doi: 10.1016/j.resconrec.2014.05.008
- Salmoral G, Yan X (2018) Food-energy-water nexus: A life cycle analysis on virtual water and embodied energy in food consumption in the Tamar catchment, UK. *Resour Conserv Recycl* 133:320–330 . doi: 10.1016/j.resconrec.2018.01.018
- Seike T, Isobe T, Harada Y, et al (2018) Analysis of the efficacy and feasibility of recycling PVC sashes in Japan. *Resour Conserv Recycl* 131:41–53 . doi: 10.1016/j.resconrec.2017.12.003
- Seo S, Kim J, Yum KK, McGregor J (2015) Embodied carbon of building products during their supply chains: Case study of aluminium window in Australia. *Resour Conserv Recycl* 105:160–166 . doi: 10.1016/j.resconrec.2015.10.024
- Singh B, Bouman EA, Strømman AH, Hertwich EG (2015) Material use for electricity generation with carbon dioxide capture and storage: Extending life cycle analysis indices for material accounting. *Resour Conserv Recycl* 100:49–57 . doi: 10.1016/j.resconrec.2015.03.010
- Sinka M, Van de Heede P, De Belie N, et al (2018) Comparative life cycle assessment of magnesium binders as an alternative for hemp concrete. *Resour Conserv Recycl* 133:288–299 . doi: 10.1016/j.resconrec.2018.02.024
- Sommerhuber PF, Wenker JL, Rüter S, Krause A (2017) Life cycle assessment of wood-plastic composites: Analysing alternative materials and identifying an environmental sound end-of-life option. *Resour Conserv Recycl* 117:235–248 . doi: 10.1016/j.resconrec.2016.10.012
- Song M, Zheng W, Wang S (2017) Measuring green technology progress in large-scale thermoelectric enterprises based on Malmquist–Luenberger life cycle assessment. *Resour Conserv Recycl* 122:261–269 . doi: 10.1016/j.resconrec.2017.03.001

- Taelman SE, De Meester S, Van Dijk W, et al (2015) Environmental sustainability analysis of a protein-rich livestock feed ingredient in the Netherlands: Microalgae production versus soybean import. *Resour Conserv Recycl* 101:61–72 . doi: 10.1016/j.resconrec.2015.05.013
- Tran T, Da G, Moreno-Santander MA, et al (2015) A comparison of energy use, water use and carbon footprint of cassava starch production in Thailand, Vietnam and Colombia. *Resour Conserv Recycl* 100:31–40 . doi: 10.1016/j.resconrec.2015.04.007
- Tucker EL, Ferraro CC, Laux SJ, Townsend TG (2018) Economic and life cycle assessment of recycling municipal glass as a pozzolan in portland cement concrete production. *Resour Conserv Recycl* 129:240–247 . doi: 10.1016/j.resconrec.2017.10.025
- Umair S, Björklund A, Petersen EE (2015) Social impact assessment of informal recycling of electronic ICT waste in Pakistan using UNEP SETAC guidelines. *Resour Conserv Recycl* 95:46–57 . doi: 10.1016/j.resconrec.2014.11.008
- Vandermeersch T, Alvarenga RAF, Ragaert P, Dewulf J (2014) Environmental sustainability assessment of food waste valorization options. *Resour Conserv Recycl* 87:57–64 . doi: 10.1016/j.resconrec.2014.03.008
- Väntsi O, Kärki T (2015) Environmental assessment of recycled mineral wool and polypropylene utilized in wood polymer composites. *Resour Conserv Recycl* 104:38–48 . doi: 10.1016/j.resconrec.2015.09.009
- Vo Dong PA, Azzaro-Pantel C, Cadene AL (2018) Economic and environmental assessment of recovery and disposal pathways for CFRP waste management. *Resour Conserv Recycl* 133:63–75 . doi: 10.1016/j.resconrec.2018.01.024
- Woon KS, Lo IMC (2016) An integrated life cycle costing and human health impact analysis of municipal solid waste management options in Hong Kong using modified eco-efficiency indicator. *Resour Conserv Recycl* 107:104–114 . doi: 10.1016/j.resconrec.2015.11.020
- Yang D, Fan L, Shi F, et al (2017) Comparative study of cement manufacturing with different strength grades using the coupled LCA and partial LCC methods—A case study in China. *Resour Conserv Recycl* 119:60–68 . doi: 10.1016/j.resconrec.2016.06.017
- Yang R, Kang S, Ozer H, Al-Qadi IL (2015) Environmental and economic analyses of recycled asphalt concrete mixtures based on material production and potential performance. *Resour Conserv Recycl* 104:141–151 . doi: 10.1016/j.resconrec.2015.08.014
- Yıldız-Geyhan E, Altun-Çiftçiöğlü GA, Kadirgan MAN (2017) Social life cycle assessment of different packaging waste collection system. *Resour Conserv Recycl* 124:1–12 . doi: 10.1016/j.resconrec.2017.04.003
- Zhang T, Xie X, Huang Z (2017) The policy recommendations on cassava ethanol in China: Analyzed from the perspective of life cycle “2E & W.” *Resour Conserv Recycl* 126:12–24 . doi: 10.1016/j.resconrec.2017.07.008
- Zhang Y, Kendall A, Yuan J (2014) A comparison of on-site nutrient and energy recycling technologies in algal oil production. *Resour Conserv Recycl* 88:13–20 . doi: 10.1016/j.resconrec.2014.04.011

## **6.2 Consequential life cycle assessment studies**

### **6.2.1 Uncertainty analysis performed**

#### **6.2.1a Monte Carlo-like approaches**

Negro V, Ruggeri B, Fino D, Tonini D (2017) Life cycle assessment of orange peel waste management. *Resour Conserv Recycl* 127:148–158 . doi: 10.1016/j.resconrec.2017.08.014

#### **6.2.1b Probabilistic (other than Monte Carlo)**

None.

#### **6.2.1c Taylor series**

None.

#### **6.2.1d Scenario analysis**

Ortner ME, Müller W, Schneider I, Bockreis A (2016) Environmental assessment of three different utilization paths of waste cooking oil from households. *Resour Conserv Recycl* 106:59–67 . doi: 10.1016/j.resconrec.2015.11.007

#### **6.2.1e Qualitative/pedigree**

None.

#### **6.2.1f Sensitivity analysis**

Mehr J, Vadenbo C, Steubing B, Hellweg S (2018) Environmentally optimal wood use in Switzerland—Investigating the relevance of material cascades. *Resour Conserv Recycl* 131:181–191 . doi: 10.1016/j.resconrec.2017.12.026

#### **6.2.1g Fuzzy logic**

None.

#### **6.2.1h Bayesian**

None.

#### **6.2.1i Regression**

None.

#### **6.2.1j Not indicated/other**

None.

#### **6.2.2 Uncertainty analysis reported as not performed**

None.

#### **6.2.3 Uncertainty mentioned but no analysis performed**

Bichraoui-Draper N, Xu M, Miller SA, Guillaume B (2015) Agent-based life cycle assessment for switchgrass-based bioenergy systems. *Resour Conserv Recycl* 103:171–178 . doi: 10.1016/j.resconrec.2015.08.003

Bigum M, Damgaard A, Scheutz C, Christensen TH (2017) Environmental impacts and resource losses of incinerating misplaced household special wastes (WEEE, batteries, ink cartridges and cables). *Resour Conserv Recycl* 122:251–260 . doi: 10.1016/j.resconrec.2017.02.013

Heimersson S, Svanström M, Cederberg C, Peters G (2017) Improved life cycle modelling of benefits from sewage sludge anaerobic digestion and land application. *Resour Conserv Recycl* 122:126–134 . doi: 10.1016/j.resconrec.2017.01.016

Hottle TA, Bilec MM, Landis AE (2017) Biopolymer production and end of life comparisons using life cycle assessment. *Resour Conserv Recycl* 122:295–306 . doi: 10.1016/j.resconrec.2017.03.002

Rigamonti L, Grosso M, Møller J, et al (2014) Environmental evaluation of plastic waste management scenarios. *Resour Conserv Recycl* 85:42–53 . doi: 10.1016/j.resconrec.2013.12.012

#### **6.2.4 No mention of uncertainty**

Sevigné-Itoiz E, Gasol CM, Rieradevall J, Gabarrell X (2014) Environmental consequences of recycling aluminum old scrap in a global market. *Resour Conserv Recycl* 89:94–103 . doi: 10.1016/j.resconrec.2014.05.002

Yazan DM (2016) Constructing joint production chains: An enterprise input-output approach for alternative energy use. *Resour Conserv Recycl* 107:38–52 . doi: 10.1016/j.resconrec.2015.11.012

### **6.3 Combination attributional and consequential life cycle assessment studies**

#### **6.3.1 Uncertainty analysis performed**

##### **6.3.1a Monte Carlo-like approaches**



None.

**6.3.1b Probabilistic (other than Monte Carlo)**

None.

**6.3.1c Taylor series**

None.

**6.3.1d Scenario analysis**

None.

**6.3.1e Qualitative/pedigree**

None.

**6.3.1f Sensitivity analysis**

None.

**6.3.1g Fuzzy logic**

None.

**6.3.1h Bayesian**

None.

**6.3.1i Regression**

None.

**6.3.1j Not indicated/other**

None.

**6.3.2 Uncertainty analysis reported as not performed**

None.

**6.3.3 Uncertainty mentioned but no analysis performed**

Olsson L, Wetterlund E, Söderström M (2015) Assessing the climate impact of district heating systems with combined heat and power production and industrial excess heat. *Resour Conserv Recycl* 96:31–39 . doi: 10.1016/j.resconrec.2015.01.006

Vera L, Sun W, Iftikhar M, Liu J (2015) LCA based comparative study of a microbial oil production starch wastewater treatment plant and its improvements with the combination of CHP system in Shandong, China. *Resour Conserv Recycl* 96:1–10 . doi: 10.1016/j.resconrec.2014.09.013

**6.3.4 No mention of uncertainty**

None.

**7. Journal of Industrial Ecology**

**7.1 Attributional life cycle assessment studies**

**7.1.1 Uncertainty analysis performed**

**7.1.1a Monte Carlo-like approaches**

Afrinaldi F, Zhang HC, Liu ZC, Hernandez A (2017) Loss and Benefit Caused by a Diesel Engine: From the Perspective of Human Health. *J Ind Ecol* 21:116–126 . doi: 10.1111/jiec.12415

Alstone P, Lai P, Mills E, Jacobson A (2014) High life cycle efficacy explains fast energy payback for improved off-grid lighting systems. *J Ind Ecol* 18:722–733 . doi: 10.1111/jiec.12117

- Bi Z, De Kleine R, Keoleian GA (2017) Integrated Life Cycle Assessment and Life Cycle Cost Model for Comparing Plug-in versus Wireless Charging for an Electric Bus System. *J Ind Ecol* 21:344–355 . doi: 10.1111/jiec.12419
- Burek J, Kim D, Nutter D, et al (2018) Environmental Sustainability of Fluid Milk Delivery Systems in the United States. *J Ind Ecol* 22:180–195 . doi: 10.1111/jiec.12531
- Cao Z, Shen L, Zhong S, et al (2018) A Probabilistic Dynamic Material Flow Analysis Model for Chinese Urban Housing Stock. *J Ind Ecol* 22:377–391 . doi: 10.1111/jiec.12579
- Gemechu ED, Helbig C, Sonnemann G, et al (2016) Import-based Indicator for the Geopolitical Supply Risk of Raw Materials in Life Cycle Sustainability Assessments. *J Ind Ecol* 20:154–165 . doi: 10.1111/jiec.12279
- Laner D, Feketitsch J, Rechberger H, Fellner J (2016) A Novel Approach to Characterize Data Uncertainty in Material Flow Analysis and its Application to Plastics Flows in Austria. *J Ind Ecol* 20:1050–1063 . doi: 10.1111/jiec.12326
- Mattinen MK, Nissinen A, Hyysalo S, Juntunen JK (2015) Energy Use and Greenhouse Gas Emissions of Air-Source Heat Pump and Innovative Ground-Source Air Heat Pump in a Cold Climate. *J Ind Ecol* 19:61–70 . doi: 10.1111/jiec.12166
- Muller S, Mutel C, Lesage P, Samson R (2018) Effects of Distribution Choice on the Modeling of Life Cycle Inventory Uncertainty: An Assessment on the Ecoinvent v2.2 Database. *J Ind Ecol* 22:300–313 . doi: 10.1111/jiec.12574
- Patrício J, Kalmykova Y, Rosado L, Lisovskaja V (2015) Uncertainty in material flow analysis indicators at different spatial levels. *J Ind Ecol* 19:837–852 . doi: 10.1111/jiec.12336
- Ross SA, Cheah L (2017) Uncertainty Quantification in Life Cycle Assessments: Interindividual Variability and Sensitivity Analysis in LCA of Air-Conditioning Systems. *J Ind Ecol* 21:1103–1114 . doi: 10.1111/jiec.12505
- Ross SA, Cheah L (2018) Uncertainty Quantification in Life Cycle Assessments: Exploring Distribution Choice and Greater Data Granularity to Characterize Product Use. *J Ind Ecol* 00:1–12 . doi: 10.1111/jiec.12742
- Song R, Clemon L, Telenko C (2018) Uncertainty and Variability of Energy and Material Use by Fused Deposition Modeling Printers in Makerspaces. *J Ind Ecol* 00:1–10 . doi: 10.1111/jiec.12772
- Tecchio P, Gregory J, Olivetti E, et al (2018) Streamlining the Life Cycle Assessment of Buildings by Structured Under-Specification and Probabilistic Triage. *J Ind Ecol* 00:1–12 . doi: 10.1111/jiec.12731

#### **7.1.1b Probabilistic (other than Monte Carlo)**

- Faludi J, Baumers M, Maskery I, Hague R (2017) Environmental Impacts of Selective Laser Melting: Do Printer, Powder, Or Power Dominate? *J Ind Ecol* 21:S144–S156 . doi: 10.1111/jiec.12528

#### **7.1.1c Taylor series**

None.

#### **7.1.1d Scenario analysis**

- Hall MR, Priestley A, Muster TH (2018) Environmental Life Cycle Costing and Sustainability: Insights from Pollution Abatement and Resource Recovery in Wastewater Treatment. *J Ind Ecol* 22:1127–1138 . doi: 10.1111/jiec.12636

#### **7.1.1e Qualitative/pedigree**

- Gavankar S, Suh S, Keller AA (2015) The Role of Scale and Technology Maturity in Life Cycle Assessment of Emerging Technologies: A Case Study on Carbon Nanotubes. *J Ind Ecol* 19:51–60 . doi: 10.1111/jiec.12175

- Hoekman P, von Blottnitz H (2017) Cape Town's Metabolism: Insights from a Material Flow Analysis. *J Ind Ecol* 21:1237–1249 . doi: 10.1111/jiec.12508

#### **7.1.1f Sensitivity analysis**

- Heller MC, Selke SEM, Keoleian GA (2018) Mapping the Influence of Food Waste in Food Packaging Environmental Performance Assessments. *J Ind Ecol* 00:1–16 . doi: 10.1111/jiec.12743
- Mayers K, Koomey JG, Hall R, et al (2014) The Carbon Footprint of Games Distribution. *J Ind Ecol* 19:402–415 . doi: 10.1111/jiec.12181
- Van der Voet E, Van Oers L, Verboon M, Kuipers K (2018) Environmental Implications of Future Demand Scenarios for Metals: Methodology and Application to the Case of Seven Major Metals. *J Ind Ecol* 00:1–15 . doi: 10.1111/jiec.12722

#### **7.1.1g Fuzzy logic**

None.

#### **7.1.1h Bayesian**

None.

#### **7.1.1i Regression**

None.

#### **7.1.1j Not indicated/other**

- El-Houjeiri H, Monfort JC, Bouchard J, Przesmitzki S (2018) Life Cycle Assessment of Greenhouse Gas Emissions from Marine Fuels: A Case Study of Saudi Crude Oil versus Natural Gas in Different Global Regions. *J Ind Ecol* 0:1–15 . doi: 10.1111/jiec.12751
- Hutner P, Helbig C, Stindt D, et al (2018) Transdisciplinary Development of a Life Cycle–Based Approach to Measure and Communicate Waste Prevention Effects in Local Authorities. *J Ind Ecol* 22:1050–1065 . doi: 10.1111/jiec.12781

#### **7.1.2 Uncertainty analysis reported as not performed**

- Boubault A, Kang S, Maïzi N (2018) Closing the TIMES Integrated Assessment Model (TIAM-FR) Raw Materials Gap with Life Cycle Inventories. *J Ind Ecol* 00:1–14 . doi: 10.1111/jiec.12780
- Karatum O, Bhuiya MMH, Carroll MK, et al (2018) Life Cycle Assessment of Aerogel Manufacture on Small and Large Scales: Weighing the Use of Advanced Materials in Oil Spill Remediation. *J Ind Ecol* 22:1365–1377 . doi: 10.1111/jiec.12720
- Langfitt Q, Haselbach L (2017) Entity Normalization in Life Cycle Assessment: Hybrid Schemes Applied to a Transportation Agency Case Study. *J Ind Ecol* 21:1090–1102 . doi: 10.1111/jiec.12527
- Pomponi F, Piroozfar PAE, Farr ERP (2016) An Investigation into GHG and non-GHG Impacts of Double Skin Façades in Office Refurbishments. *J Ind Ecol* 20:234–248 . doi: 10.1111/jiec.12368

#### **7.1.3 Uncertainty mentioned but no analysis performed**

- Achachlouei MA, Moberg Å (2015) Life Cycle Assessment of a Magazine, Part II: A Comparison of Print and Tablet Editions. *J Ind Ecol* 19:590–606 . doi: 10.1111/jiec.12229
- Achachlouei MA, Moberg Å, Hochschorner E (2015) Life Cycle Assessment of a Magazine, Part I: Tablet Edition in Emerging and Mature States. *J Ind Ecol* 19:575–589 . doi: 10.1111/jiec.12227
- Almeida C, Vaz S, Ziegler F (2015) Environmental Life Cycle Assessment of a Canned Sardine Product from Portugal. *J Ind Ecol* 19:607–617 . doi: 10.1111/jiec.12219
- Alvarez S, Tobarra MA, Zafrilla JE (2018) Corporate and Product Carbon Footprint under Compound Hybrid Analysis: Application to a Spanish Timber Company. *J Ind Ecol* 00:1–12 . doi: 10.1111/jiec.12759
- Arvidsson R, Molander S (2017) Prospective Life Cycle Assessment of Epitaxial Graphene Production at Different Manufacturing Scales and Maturity. *J Ind Ecol* 21:1153–1164 . doi: 10.1111/jiec.12526
- Beloin-Saint-Pierre D, Levasseur A, Margni M, Blanc I (2017) Implementing a Dynamic Life Cycle Assessment Methodology with a Case Study on Domestic Hot Water Production. *J Ind Ecol* 21:1128–1138 . doi: 10.1111/jiec.12499

- Boland CS, De Kleine R, Keoleian GA, et al (2016) Life Cycle Impacts of Natural Fiber Composites for Automotive Applications: Effects of Renewable Energy Content and Lightweighting. *J Ind Ecol* 20:179–189 . doi: 10.1111/jiec.12286
- Bukoski JJ, Chaiwiwatworakul P, Gheewala SH (2017) The Life Cycle Assessment of an Energy-Positive Peri-Urban Residence in a Tropical Regime. *J Ind Ecol* 21:1115–1127 . doi: 10.1111/jiec.12494
- Catalán E, Komilis D, Sánchez A (2018) A Life Cycle Assessment on the Dehairing of Rawhides: Chemical Treatment versus Enzymatic Recovery through Solid State Fermentation. *J Ind Ecol* 00:1–13 . doi: 10.1111/jiec.12753
- Cimini A, Moresi M (2018) Effect of Brewery Size on the Main Process Parameters and Cradle-to-Grave Carbon Footprint of Lager Beer. *J Ind Ecol* 22:1139–1155 . doi: 10.1111/jiec.12642
- Collado-Ruiz D, Ostad-Ahmad-Ghorabi H (2016) Method for Setting Environmental Targets in Product Development: Incorporating Use-Phase Impact by Subsystem. *J Ind Ecol* 20:8–17 . doi: 10.1111/jiec.12294
- Cucurachi S, van der Giesen CC, Heijungs R, de Snoo GR (2017) No Matter – How?: Dealing with Matter-less Stressors in LCA of Wind Energy Systems. *J Ind Ecol* 21:70–81 . doi: 10.1111/jiec.12416
- Daddi T, Nucci B, Iraldo F, Testa F (2016) Enhancing the adoption of life cycle assessment by small and medium enterprises grouped in an industrial cluster: A case study of the tanning cluster in Tuscany (Italy). *J Ind Ecol* 20:1199–1211 . doi: 10.1111/jiec.12379
- Dias A, Lemos D, Gabarrell X, Arroja L (2018) Comparison of tools for quantifying the environmental performance of an urban territory. *J Ind Ecol* 22:868–880 . doi: 10.1111/jiec.12614
- Ding N, Gao F, Wang Z, Yang J (2016) Life Cycle Energy and Greenhouse Gas Emissions of Automobiles Using Aluminum in China. *J Ind Ecol* 20:818–827 . doi: 10.1111/jiec.12298
- Faludi J, Baumers M, Maskery I, Hague R (2017) Environmental Impacts of Selective Laser Melting: Do Printer, Powder, Or Power Dominate? *J Ind Ecol* 21:S144–S156 . doi: 10.1111/jiec.12528
- Froemelt A, Mauchle M, Steubing B, Hellweg S (2018) Greenhouse Gas Emissions Quantification and Reduction Efforts in a Rural Municipality. *J Ind Ecol* 22:92–105 . doi: 10.1111/jiec.12534
- Fry J, Lenzen M, Giurco D, Pauliuk S (2016) An Australian Multi-Regional Waste Supply-Use Framework. *J Ind Ecol* 20:1295–1305 . doi: 10.1111/jiec.12376
- Gallagher J, Basu B, Browne M, et al (2017) Adapting Stand-Alone Renewable Energy Technologies for the Circular Economy through Eco-Design and Recycling. *J Ind Ecol* 00:1–8 . doi: 10.1111/jiec.12703
- Garcia R, Freire F, Clift R (2018) Effects on Greenhouse Gas Emissions of Introducing Electric Vehicles into an Electricity System with Large Storage Capacity. *J Ind Ecol* 22:288–299 . doi: 10.1111/jiec.12593
- Gaudreault C, Miner R (2015) Temporal Aspects in Evaluating the Greenhouse Gas Mitigation Benefits of Using Residues from Forest Products Manufacturing Facilities for Energy Production. *J Ind Ecol* 19:994–1007 . doi: 10.1111/jiec.12225
- Grant A, Ries R, Kibert C (2014) Life cycle assessment and service life prediction: A case study of building envelope materials. *J Ind Ecol* 18:187–200 . doi: 10.1111/jiec.12089
- Haupt M, Vadenbo C, Hellweg S (2017) Do We Have the Right Performance Indicators for the Circular Economy?: Insight into the Swiss Waste Management System. *J Ind Ecol* 21:615–627 . doi: 10.1111/jiec.12506
- Heeren N, Hellweg S (2018) Tracking Construction Material over Space and Time: Prospective and Geo-referenced Modeling of Building Stocks and Construction Material Flows. *J Ind Ecol* 00:1–15 . doi: 10.1111/jiec.12739
- Henriksen T, Astrup TF, Damgaard A (2018) Linking Data Choices and Context Specificity in Life Cycle Assessment of Waste Treatment Technologies: A Landfill Case Study. *J Ind Ecol* 22:1039–1049 . doi: 10.1111/jiec.12709
- Husgafvel R, Nordlund H, Heino J, et al (2016) Use of Symbiosis Products from Integrated Pulp and Paper and Carbon Steel Mills: Legal Status and Environmental Burdens. *J Ind Ecol* 20:1187–1198 . doi: 10.1111/jiec.12348

- Kendall A, Marvinney E, Brodt S, Zhu W (2015) Life Cycle-based Assessment of Energy Use and Greenhouse Gas Emissions in Almond Production, Part I: Analytical Framework and Baseline Results. *J Ind Ecol* 19:1008–1018 . doi: 10.1111/jiec.12332
- Kim HC, Wallington TJ, Mueller SA, et al (2016) Life Cycle Water Use of Ford Focus Gasoline and Ford Focus Electric Vehicles. *J Ind Ecol* 20:1122–1133 . doi: 10.1111/jiec.12329
- Kulczycka J, Lelek Ł, Lewandowska A, et al (2016) Environmental Impacts of Energy-Efficient Pyrometallurgical Copper Smelting Technologies: The Consequences of Technological Changes from 2010 to 2050. *J Ind Ecol* 20:304–316 . doi: 10.1111/jiec.12369
- Laurenti R, Redwood M, Puig R, Frostell B (2017) Measuring the Environmental Footprint of Leather Processing Technologies. *J Ind Ecol* 21:1180–1187 . doi: 10.1111/jiec.12504
- Lee SJ, Hawkins TR, Ingwersen WW, Young DM (2015) Exploring the Use of Ecological Footprint in Life Cycle Impact Assessment: Findings from a Comparison of Transportation Fuels. *J Ind Ecol* 19:416–426 . doi: 10.1111/jiec.12188
- Lessard Y, Anand C, Blanchet P, et al (2018) LEED v4: Where Are We Now? Critical Assessment through the LCA of an Office Building Using a Low Impact Energy Consumption Mix. *J Ind Ecol* 22:1105–1116 . doi: 10.1111/jiec.12647
- Li H, Wu T, Wang X, Qi Y (2016) The Greenhouse Gas Footprint of China's Food System: An Analysis of Recent Trends and Future Scenarios. *J Ind Ecol* 20:803–817 . doi: 10.1111/jiec.12323
- Lindner S, Guan D (2014) A hybrid-unit energy input-output model to evaluate embodied energy and life cycle emissions for China's economy. *J Ind Ecol* 18:201–211 . doi: 10.1111/jiec.12119
- Liu X, Bakshi BR (2018) Ecosystem Services in Life Cycle Assessment while Encouraging Techno-Ecological Synergies. *J Ind Ecol* 00:1–14 . doi: 10.1111/jiec.12755
- Malmodin J, Lunden D, Moberg Å, et al (2014) Life Cycle Assessment of ICT: Carbon Footprint and Operational Electricity Use from the Operator, National, and Subscriber Perspective in Sweden. *J Ind Ecol* 18:829–845 . doi: 10.1111/jiec.12145
- Marvinney E, Kendall A, Brodt S (2015) Life Cycle-based Assessment of Energy Use and Greenhouse Gas Emissions in Almond Production, Part II: Uncertainty Analysis through Sensitivity Analysis and Scenario Testing. *J Ind Ecol* 19:1019–1029 . doi: 10.1111/jiec.12333
- Mendoza JMF, Josa A, Rieradevall J, Gabarrell X (2016) Environmental Impact of Public Charging Facilities for Electric Two-Wheelers. *J Ind Ecol* 20:54–66 . doi: 10.1111/jiec.12270
- Moran D, Mcbain D, Kanemoto K, et al (2015) Global Supply Chains of Coltan: A Hybrid Life Cycle Assessment Study Using a Social Indicator. *J Ind Ecol* 19:357–365 . doi: 10.1111/jiec.12206
- Niero M, Olsen SI, Laurent A (2018) Renewable energy and carbon management in the Cradle-to-Cradle certification: Limitations and opportunities. *J Ind Ecol* 22:760–772 . doi: 10.1111/jiec.12594
- Pelton REO, Smith TM (2015) Hotspot Scenario Analysis: Comparative Streamlined LCA Approaches for Green Supply Chain and Procurement Decision Making Pelton and Smith Hotspot Scenario Analysis. *J Ind Ecol* 19:427–440 . doi: 10.1111/jiec.12191
- Raschio G, Smetana S, Contreras C, et al (2018) Spatio-Temporal Differentiation of Life Cycle Assessment Results for Average Perennial Crop Farm: A Case Study of Peruvian Cocoa Progression and Deforestation Issues. *J Ind Ecol* 22:1378–1388 . doi: 10.1111/jiec.12692
- Richa K, Babbitt CW, Gaustad G (2017) Eco-Efficiency Analysis of a Lithium-Ion Battery Waste Hierarchy Inspired by Circular Economy. *J Ind Ecol* 21:715–730 . doi: 10.1111/jiec.12607
- Salman M, Dubois M, Maria A Di, et al (2016) Construction Materials from Stainless Steel Slags: Technical Aspects, Environmental Benefits, and Economic Opportunities. *J Ind Ecol* 20:854–866 . doi: 10.1111/jiec.12314
- Scanlon KA, Lloyd SM, Gray GM, et al (2015) An Approach to Integrating Occupational Safety and Health into Life Cycle Assessment: Development and Application of Work Environment Characterization Factors. *J Ind Ecol* 19:27–37 . doi: 10.1111/jiec.12146
- Sekine N, Daigo I, Goto Y (2017) Dynamic Substance Flow Analysis of Neodymium and Dysprosium Associated with Neodymium Magnets in Japan. *J Ind Ecol* 21:356–367 . doi: 10.1111/jiec.12458

- Serna-Mansoux L, Popoff A, Millet D (2014) A simplified model to include dynamic product-user interaction in the eco-design process: The paper towel dispenser case study serna-mansoux et al. Product-use dynamics in product eco-design process. *J Ind Ecol* 18:529–544 . doi: 10.1111/jiec.12160
- Shuaib M, Seevers D, Zhang X, et al (2014) Product sustainability index (ProdSI): A metrics-based framework to evaluate the total life cycle sustainability of manufactured products. *J Ind Ecol* 18:491–507 . doi: 10.1111/jiec.12179
- Singh B, Guest G, Bright RM, Strømman AH (2014) Life cycle assessment of electric and fuel cell vehicle transport based on forest biomass. *J Ind Ecol* 18:176–186 . doi: 10.1111/jiec.12098
- Skudder H, Druckman A, Cole J, et al (2017) Addressing the Carbon-Crime Blind Spot: A Carbon Footprint Approach. *J Ind Ecol* 21:829–843 . doi: 10.1111/jiec.12457
- Stanisavljevic N, Levis JW, Barlaz MA (2018) Application of a Life Cycle Model for European Union Policy-Driven Waste Management Decision Making in Emerging Economies. *J Ind Ecol* 22:341–355 . doi: 10.1111/jiec.12564
- Steen-Olsen K, Wood R, Hertwich EG (2016) The Carbon Footprint of Norwegian Household Consumption 1999–2012. *J Ind Ecol* 20:582–592 . doi: 10.1111/jiec.12405
- Sujauddin M, Koide R, Komatsu T, et al (2017) Ship Breaking and the Steel Industry in Bangladesh: A Material Flow Perspective. *J Ind Ecol* 21:191–203 . doi: 10.1111/jiec.12423
- Suter F, Steubing B, Hellweg S (2017) Life Cycle Impacts and Benefits of Wood along the Value Chain: The Case of Switzerland. *J Ind Ecol* 21:874–886 . doi: 10.1111/jiec.12486
- Taptich MN, Horvath A, Chester M V. (2016) Worldwide Greenhouse Gas Reduction Potentials in Transportation by 2050. *J Ind Ecol* 20:329–340 . doi: 10.1111/jiec.12391
- Tsai L, Kelly JC, Simon BS, et al (2016) Life Cycle Assessment of Offshore Wind Farm Siting: Effects of Locational Factors, Lake Depth, and Distance from Shore. *J Ind Ecol* 20:1370–1383 . doi: 10.1111/jiec.12400
- van Putten IE, Farmery AK, Green BS, et al (2016) The Environmental Impact of Two Australian Rock Lobster Fishery Supply Chains under a Changing Climate. *J Ind Ecol* 20:1384–1398 . doi: 10.1111/jiec.12382
- Vendries Algaran J, Hawkins TR, Marriott J, et al (2015) Disaggregating the Power Generation Sector for Input-Output Life Cycle Assessment. *J Ind Ecol* 19:666–675 . doi: 10.1111/jiec.12207
- Ventura A, Kiess TS (2015) Sensitivity Analysis of Environmental Process Modeling in a Life Cycle Context: A Case Study of Hemp Crop Production. *J Ind Ecol* 19:978–993 . doi: 10.1111/jiec.12228
- Vergara SE, Damgaard A, Gomez D (2016) The Efficiency of Informality: Quantifying Greenhouse Gas Reductions from Informal Recycling in Bogotá, Colombia. *J Ind Ecol* 20:107–119 . doi: 10.1111/jiec.12257
- Vidal R, Moliner E, Martin PP, et al (2018) Life Cycle Assessment of Novel Aircraft Interior Panels Made from Renewable or Recyclable Polymers with Natural Fiber Reinforcements and Non-Halogenated Flame Retardants. *J Ind Ecol* 22:132–144 . doi: 10.1111/jiec.12544
- Wang T, Zhou J, Yue Y, et al (2016) Weight under Steel Wheels: Material Stock and Flow Analysis of High-Speed Rail in China. *J Ind Ecol* 20:1349–1359 . doi: 10.1111/jiec.12383
- Wenker JL, Achenbach H, Diederichs SK, Rüter S (2016) Life Cycle Assessment of Wooden Interior Doors in Germany: A Sector-Representative Approach for a Complex Wooden Product According to EN 15804 Methodology. *J Ind Ecol* 20:730–742 . doi: 10.1111/jiec.12296
- Wu SR, Li X, Apul D, et al (2017) Agent-Based Modeling of Temporal and Spatial Dynamics in Life Cycle Sustainability Assessment. *J Ind Ecol* 21:1507–1521 . doi: 10.1111/jiec.12666
- Wulf C, Zapp P, Schreiber A, et al (2017) Lessons Learned from a Life Cycle Sustainability Assessment of Rare Earth Permanent Magnets. *J Ind Ecol* 21:1578–1590 . doi: 10.1111/jiec.12575

#### **7.1.4 No mention of uncertainty**

- Almeida J, Achten WMJ, Verbist B, et al (2014) Carbon and water footprints and energy use of greenhouse tomato production in Northern Italy. *J Ind Ecol* 18:898–908 . doi: 10.1111/jiec.12169

- Burger Chakraborty L, Sahakian M, Rani U, et al (2016) Urban Food Consumption in Metro Manila: Interdisciplinary Approaches Towards Apprehending Practices, Patterns, and Impacts. *J Ind Ecol* 20:559–570 . doi: 10.1111/jiec.12402
- Calvo G, Valero A, Valero A (2018) Thermodynamic approach to evaluate the criticality of raw materials and its application through a material flow analysis in europe. *J Ind Ecol* 22:839–852 . doi: 10.1111/jiec.12624
- Cazcarro I, Duarte R, Sánchez Chóliz J (2016) Tracking Water Footprints at the Micro and Meso Scale: An Application to Spanish Tourism by Regions and Municipalities. *J Ind Ecol* 20:446–461 . doi: 10.1111/jiec.12414
- Cerdas F, Juraschek M, Thiede S, Herrmann C (2017) Life Cycle Assessment of 3D Printed Products in a Distributed Manufacturing System. *J Ind Ecol* 21:S80–S93 . doi: 10.1111/jiec.12618
- Clark SS, Chester M V. (2017) A Hybrid Approach for Assessing the Multi-Scale Impacts of Urban Resource Use: Transportation in Phoenix, Arizona. *J Ind Ecol* 21:136–150 . doi: 10.1111/jiec.12422
- Cohen E, Ramaswami A (2014) The Water Withdrawal Footprint of Energy Supply to Cities: Conceptual Development and Application to Denver, Colorado, USA. *J Ind Ecol* 18:26–39 . doi: 10.1111/jiec.12086
- Colett JS, Kelly JC, Keoleian GA (2016) Using Nested Average Electricity Allocation Protocols to Characterize Electrical Grids in Life Cycle Assessment. *J Ind Ecol* 20:29–41 . doi: 10.1111/jiec.12268
- Corona B, Bozhilova-Kisheva KP, Olsen SI, San Miguel G (2017) Social Life Cycle Assessment of a Concentrated Solar Power Plant in Spain: A Methodological Proposal. *J Ind Ecol* 21:1566–1577 . doi: 10.1111/jiec.12541
- Cubi E, Zibin NF, Thompson SJ, Bergerson J (2016) Sustainability of Rooftop Technologies in Cold Climates: Comparative Life Cycle Assessment of White Roofs, Green Roofs, and Photovoltaic Panels. *J Ind Ecol* 20:249–262 . doi: 10.1111/jiec.12269
- Dong H, Liu Z, Geng Y, et al (2018) Evaluating Environmental Performance of Industrial Park Development: The Case of Shenyang. *J Ind Ecol* 22:1402–1412 . doi: 10.1111/jiec.12724
- Guignot S, Touzé S, Von der Weid F, et al (2015) Recycling Construction and Demolition Wastes as Building Materials: A Life Cycle Assessment. *J Ind Ecol* 19:1030–1043 . doi: 10.1111/jiec.12262
- Hicks AL (2018) Environmental Implications of Consumer Convenience: Coffee as a Case Study. *J Ind Ecol* 22:79–91 . doi: 10.1111/jiec.12487
- Hoppe W, Thonemann N, Bringezu S (2018) Life Cycle Assessment of Carbon Dioxide–Based Production of Methane and Methanol and Derived Polymers. *J Ind Ecol* 22:327–340 . doi: 10.1111/jiec.12583
- Huang B, Zhao J, Chai J, et al (2017) Economic and Social Impact Assessment of China’s Multi-Crystalline Silicon Photovoltaic Modules Production. *J Ind Ecol* 22:894–903 . doi: 10.1111/jiec.12576
- Kalbar PP, Birkved M, Nygaard SE, Hauschild M (2017) Weighting and Aggregation in Life Cycle Assessment: Do Present Aggregated Single Scores Provide Correct Decision Support? *J Ind Ecol* 21:1591–1600 . doi: 10.1111/jiec.12520
- Kikuchi Y, Kanematsu Y, Ugo M, et al (2016) Industrial Symbiosis Centered on a Regional Cogeneration Power Plant Utilizing Available Local Resources: A Case Study of Tanegashima. *J Ind Ecol* 20:276–288 . doi: 10.1111/jiec.12347
- Kim HW, Ohnishi S, Fujii M, et al (2018) Evaluation and Allocation of Greenhouse Gas Reductions in Industrial Symbiosis. *J Ind Ecol* 22:275–287 . doi: 10.1111/jiec.12539
- Lee JCK, Wen Z (2017) Rare Earths from Mines to Metals: Comparing Environmental Impacts from China’s Main Production Pathways. *J Ind Ecol* 21:1277–1290 . doi: 10.1111/jiec.12491
- Liu Z, Li T, Jiang Q, Zhang H (2014) Life cycle assessment-based comparative evaluation of originally manufactured and remanufactured diesel engines. *J Ind Ecol* 18:567–576 . doi: 10.1111/jiec.12137
- Nahlik MJ, Kaehr AT, Chester MV, et al (2016) Goods Movement Life Cycle Assessment for Greenhouse Gas Reduction Goals. *J Ind Ecol* 20:317–328 . doi: 10.1111/jiec.12277
- O’Connor M, Garnier G, Batchelor W (2014) The trade-off between environmental impacts in water recycling systems using industrial effluent. *J Ind Ecol* 18:771–783 . doi: 10.1111/jiec.12115
- Priarone PC, Ingarao G, di Lorenzo R, Settineri L (2017) Influence of Material-Related Aspects of Additive and Subtractive Ti-6Al-4V Manufacturing on Energy Demand and Carbon Dioxide Emissions. *J Ind Ecol* 21:S191–S202 . doi: 10.1111/jiec.12523

- Sanyé-Mengual E, Pérez-López P, González-García S, et al (2014) Eco-designing the use phase of products in sustainable manufacturing: The importance of maintenance and communication-to-user strategies. *J Ind Ecol* 18:545–557 . doi: 10.1111/jiec.12161
- Schlei-Peters I, Wichmann MG, Matthes IG, et al (2018) Integrated Material Flow Analysis and Process Modeling to Increase Energy and Water Efficiency of Industrial Cooling Water Systems. *J Ind Ecol* 22:41–54 . doi: 10.1111/jiec.12540
- Smith K, Liu S, Chang T (2016) Contribution of Urban Water Supply to Greenhouse Gas Emissions in China. *J Ind Ecol* 20:792–802 . doi: 10.1111/jiec.12290
- Vendries Algaran J, Hawkins TR, Marriott J, Khanna V (2016) Effects of Using Heterogeneous Prices on the Allocation of Impacts from Electricity Use: A Mixed-Unit Input-Output Approach. *J Ind Ecol* 21:1333–1343 . doi: 10.1111/jiec.12502
- Wenker JL, Richter K, Rüter S (2017) A Methodical Approach for Systematic Life Cycle Assessment of Wood-Based Furniture. *J Ind Ecol* 22:671–685 . doi: 10.1111/jiec.12581

## **7.2 Consequential life cycle assessment studies**

### **7.2.1 Uncertainty analysis performed**

#### **7.2.1a Monte Carlo-like approaches**

- Pagoropoulos A, Kjaer LL, Dong Y, et al (2018) Economic and environmental impact trade-offs related to in-water hull cleanings of merchant vessels. *J Ind Ecol* 22:916–929 . doi: 10.1111/jiec.12627

#### **7.2.1b Probabilistic (other than Monte Carlo)**

None.

#### **7.2.1c Taylor series**

None.

#### **7.2.1d Scenario analysis**

None.

#### **7.2.1e Qualitative/pedigree**

None.

#### **7.2.1f Sensitivity analysis**

None.

#### **7.2.1g Fuzzy logic**

None.

#### **7.2.1h Bayesian**

None.

#### **7.2.1i Regression**

None.

#### **7.2.1j Not indicated/other**

None.

### **7.2.2 Uncertainty analysis reported as not performed**

- Dandres T, Vandromme N, Obrekht G, et al (2017) Consequences of Future Data Center Deployment in Canada on Electricity Generation and Environmental Impacts: A 2015–2030 Prospective Study. *J Ind Ecol* 21:1312–1322 . doi: 10.1111/jiec.12515



Morris J (2017) Recycle, Bury, or Burn Wood Waste Biomass?: LCA Answer Depends on Carbon Accounting, Emissions Controls, Displaced Fuels, and Impact Costs. *J Ind Ecol* 21:844–856 . doi: 10.1111/jiec.12469

### **7.2.3 Uncertainty mentioned but no analysis performed**

Bergesen JD, Tähkämö L, Gibon T, Suh S (2016) Potential Long-Term Global Environmental Implications of Efficient Light-Source Technologies. *J Ind Ecol* 20:263–275 . doi: 10.1111/jiec.12342

Beucker S, Bergesen JD, Gibon T (2016) Building Energy Management Systems: Global Potentials and Environmental Implications of Deployment. *J Ind Ecol* 20:223–233 . doi: 10.1111/jiec.12378

Beylot A, Vaxelaire S, Villeneuve J (2016) Reducing Gaseous Emissions and Resource Consumption Embodied in French Final Demand: How Much Can Waste Policies Contribute? *J Ind Ecol* 20:905–916 . doi: 10.1111/jiec.12318

Cashman SA, Moran KM, Gaglione AG (2016) Greenhouse Gas and Energy Life Cycle Assessment of Pine Chemicals Derived from Crude Tall Oil and Their Substitutes. *J Ind Ecol* 20:1108–1121 . doi: 10.1111/jiec.12370

Chobtang J, McLaren SJ, Ledgard SF, Donaghy DJ (2017) Consequential Life Cycle Assessment of Pasture-based Milk Production: A Case Study in the Waikato Region, New Zealand. *J Ind Ecol* 21:1139–1152 . doi: 10.1111/jiec.12484

Font Vivanco D, Kemp R, van der Voet E, Heijungs R (2014) Using LCA-based Decomposition Analysis to Study the Multidimensional Contribution of Technological Innovation to Environmental Pressures. *J Ind Ecol* 18:380–392 . doi: 10.1111/jiec.12118

Glew D, Stringer LC, Acquaye A, McQueen-Mason S (2017) Evaluating the Potential for Harmonized Prediction and Comparison of Disposal-Stage Greenhouse Gas Emissions for Biomaterial Products. *J Ind Ecol* 21:101–115 . doi: 10.1111/jiec.12421

Kayo C, Dente SMR, Aoki-Suzuki C, et al (2018) Environmental Impact Assessment of Wood Use in Japan through 2050 Using Material Flow Analysis and Life Cycle Assessment. *J Ind Ecol* 00:1–14 . doi: 10.1111/jiec.12766

Kerdlap P, Gheewala SH (2016) Electric Motorcycles in Thailand: A Life Cycle Perspective. *J Ind Ecol* 20:1399–1411 . doi: 10.1111/jiec.12406

Røyne F, Hackl R, Ringström E, Berlin J (2018) Environmental evaluation of industry cluster strategies with a life cycle perspective: Replacing fossil feedstock with forest-based feedstock and increasing thermal energy integration. *J Ind Ecol* 22:694–705 . doi: 10.1111/jiec.12620

Vandepaer L, Cloutier J, Bauer C, Amor B (2018) Integrating Batteries in the Future Swiss Electricity Supply System: A Consequential Environmental Assessment. *J Ind Ecol* 00:1–17 . doi: 10.1111/jiec.12774

Watanabe MDB, Chagas MF, Cavalett O, et al (2016) Hybrid Input-Output Life Cycle Assessment of First- and Second-Generation Ethanol Production Technologies in Brazil. *J Ind Ecol* 20:764–774 . doi: 10.1111/jiec.12325

Zamani B, Svanstrom M, Peters G, Rydberg T (2015) A Carbon Footprint of Textile Recycling: A Case Study in Sweden. *J Ind Ecol* 19:676–687 . doi: 10.1111/jiec.12208

### **7.2.4 No mention of uncertainty**

Geyer R, Kuczenski B, Trujillo M (2016) Assessing the Greenhouse Gas Savings Potential of Extended Producer Responsibility for Mattresses and Boxsprings in the United States. *J Ind Ecol* 20:917–928 . doi: 10.1111/jiec.12313

Pizzol M (2015) Life Cycle Assessment and the Resilience of Product Systems. *J Ind Ecol* 19:296–306 . doi: 10.1111/jiec.12254

## **7.3 Combination attributional and consequential life cycle assessment studies**

### **7.3.1 Uncertainty analysis performed**

#### **7.3.1a Monte Carlo-like approaches**

None.

**7.3.1b Probabilistic (other than Monte Carlo)**

None.

**7.3.1c Taylor series**

None.

**7.3.1d Scenario analysis**

Kua HW, Maghimai M (2017) Steel-versus-Concrete Debate Revisited: Global Warming Potential and Embodied Energy Analyses based on Attributional and Consequential Life Cycle Perspectives. *J Ind Ecol* 21:82–100 . doi: 10.1111/jiec.12409

**7.3.1e Qualitative/pedigree**

None.

**7.3.1f Sensitivity analysis**

None.

**7.3.1g Fuzzy logic**

None.

**7.3.1h Bayesian**

None.

**7.3.1i Regression**

None.

**7.3.1j Not indicated/other**

None.

**7.3.2 Uncertainty analysis reported as not performed**

None.

**7.3.3 Uncertainty mentioned but no analysis performed**

None.

**7.3.4 No mention of uncertainty**

None.
