# Supplementary material for: Comparing sources and analysis of uncertainty in consequential and attributional life cycle assessment: review of current practice and recommendations
Source: Springer Nature journal article supplement (doi:10.1007/s11367-019-01663-1), 2019-07-29
Supplement: MOESM2 [file 17020868]

## Supplementary information B: Individual journal data tables

|                                                       | Number of studies reviewed | Uncertainty analysis performed/discussed | Uncertainty analysis reported as not performed | Uncertainty mentioned but not quantified | No mention of uncertainty |
|-------------------------------------------------------|----------------------------|------------------------------------------|------------------------------------------------|------------------------------------------|---------------------------|
| <b>International Journal of Life Cycle Assessment</b> |                            |                                          |                                                |                                          |                           |
| ALCA                                                  | 397                        | 119 (30%)                                | 15 (4%)                                        | 144 (36%)                                | 119 (30%)                 |
| CLCA                                                  | 16                         | 3 (19%)                                  | 0 (0%)                                         | 9 (56%)                                  | 4 (25%)                   |
| ALCA+CLCA                                             | 8                          | 3 (38%)                                  | 0 (0%)                                         | 2 (25%)                                  | 3 (38%)                   |
| Not an LCA                                            | 310                        | 44 (14%)                                 | 4 (1%)                                         | 149 (48%)                                | 113 (36%)                 |

Table S1. Types of LCA studies and reporting of uncertainty in the International Journal of Life Cycle Assessment from January 2014-August 2018. In the “Uncertainty analysis performed/discussed” column, “performed” refers to uncertainty analysis performed in an LCA case study, and “discussed” refers to non-LCA studies which discussed the use of a particular type of uncertainty analysis in general. See supplementary file A for complete list of citations.

|                                      | Number of studies reviewed | Uncertainty analysis performed | Uncertainty analysis reported as not performed | Uncertainty mentioned but not quantified | No mention of uncertainty |
|--------------------------------------|----------------------------|--------------------------------|------------------------------------------------|------------------------------------------|---------------------------|
| <b>Journal of Cleaner Production</b> |                            |                                |                                                |                                          |                           |
| ALCA                                 | 1349                       | 231 (17%)                      | 20 (1%)                                        | 430 (32%)                                | 667 (50%)                 |
| CLCA                                 | 60                         | 8 (13%)                        | 0 (0%)                                         | 29 (48%)                                 | 23 (38%)                  |
| ALCA+CLCA                            | 17                         | 3 (18%)                        | 0 (0%)                                         | 1 (59%)                                  | 4 (24%)                   |

Table S2. Types of LCA studies and reporting of uncertainty in Journal of Cleaner Production from January 2014-August 2018. See supplementary file A for complete list of citations.

|                       | Number of studies reviewed | Uncertainty analysis performed | Uncertainty analysis reported as not performed | Uncertainty mentioned but not quantified | No mention of uncertainty |
|-----------------------|----------------------------|--------------------------------|------------------------------------------------|------------------------------------------|---------------------------|
| <b>Sustainability</b> |                            |                                |                                                |                                          |                           |
| ALCA                  | 140                        | 9(6%)                          | 1 (1%)                                         | 56 (40%)                                 | 74 (53%)                  |
| CLCA                  | 6                          | 0 (0%)                         | 0 (0%)                                         | 5 (83%)                                  | 1 (17%)                   |
| ALCA+CLCA             | 1                          | 0 (0%)                         | 0 (0%)                                         | 1 (100%)                                 | 0 (0%)                    |

Table S3. Types of LCA studies and reporting of uncertainty in Sustainability from January 2014-August 2018. See supplementary file A for complete list of citations.

|                       | Number of studies reviewed | Uncertainty analysis performed | Uncertainty analysis reported as not performed | Uncertainty mentioned but not quantified | No mention of uncertainty |
|-----------------------|----------------------------|--------------------------------|------------------------------------------------|------------------------------------------|---------------------------|
| <b>Applied Energy</b> |                            |                                |                                                |                                          |                           |
| ALCA                  | 214                        | 40 (19%)                       | 5 (2%)                                         | 72 (34%)                                 | 97 (45%)                  |
| CLCA                  | 17                         | 4 (24%)                        | 0 (0%)                                         | 9 (53%)                                  | 4 (24%)                   |
| ALCA+CLCA             | 0                          | 0 (0%)                         | 0 (0%)                                         | 0 (0%)                                   | 0 (0%)                    |

Table S4. Types of LCA studies and reporting of uncertainty in Applied Energy from January 2014-August 2018. See supplementary file A for complete list of citations.

|                                         | Number of studies reviewed | Uncertainty analysis performed | Uncertainty analysis reported as not performed | Uncertainty mentioned but not quantified | No mention of uncertainty |
|-----------------------------------------|----------------------------|--------------------------------|------------------------------------------------|------------------------------------------|---------------------------|
| <b>Science of the Total Environment</b> |                            |                                |                                                |                                          |                           |
| ALCA                                    | 162                        | 20 (12%)                       | 3 (2%)                                         | 74 (46%)                                 | 65 (40%)                  |
| CLCA                                    | 9                          | 1 (11%)                        | 0 (0%)                                         | 6 (67%)                                  | 2 (22%)                   |
| ALCA+CLCA                               | 3                          | 0 (0%)                         | 0 (0%)                                         | 2 (67%)                                  | 1 (33%)                   |

Table S5. Types of LCA studies and reporting of uncertainty in Science of the Total Environment from January 2014-August 2018. See supplementary file A for complete list of citations.

|                                              | Number of studies reviewed | Uncertainty analysis performed | Uncertainty analysis reported as not performed | Uncertainty mentioned but not quantified | No mention of uncertainty |
|----------------------------------------------|----------------------------|--------------------------------|------------------------------------------------|------------------------------------------|---------------------------|
| <b>Resources, Conservation and Recycling</b> |                            |                                |                                                |                                          |                           |
| ALCA                                         | 136                        | 33 (24%)                       | 6 (4%)                                         | 28 (21%)                                 | 69 (51%)                  |
| CLCA                                         | 10                         | 3 (30%)                        | 0 (0%)                                         | 5 (50%)                                  | 2 (20%)                   |
| ALCA+CLCA                                    | 2                          | 0 (0%)                         | 0 (0%)                                         | 0 (0%)                                   | 2 (100%)                  |

Table S6. Types of LCA studies and reporting of uncertainty in Resources, Conservation and Recycling from January 2014-August 2018. See supplementary file A for complete list of citations.

|                                      | Number of studies reviewed | Uncertainty analysis performed | Uncertainty analysis reported as not performed | Uncertainty mentioned but not quantified | No mention of uncertainty |
|--------------------------------------|----------------------------|--------------------------------|------------------------------------------------|------------------------------------------|---------------------------|
| <b>Journal of Industrial Ecology</b> |                            |                                |                                                |                                          |                           |
| ALCA                                 | 121                        | 23 (19%)                       | 4 (3%)                                         | 66 (55%)                                 | 28 (23%)                  |
| CLCA                                 | 18                         | 1 (6%)                         | 2 (11%)                                        | 13 (72%)                                 | 2 (11%)                   |
| ALCA+CLCA                            | 1                          | 1 (100%)                       | 0 (0%)                                         | 0 (0%)                                   | 0 (0%)                    |

Table S7. Types of LCA studies and reporting of uncertainty in Journal of Industrial Ecology from January 2014-August 2018. See supplementary file A for complete list of citations.

|                                                       | Number of studies reviewed | Studies with uncertainty analysis | % of studies with uncertainty analysis |
|-------------------------------------------------------|----------------------------|-----------------------------------|----------------------------------------|
| <b>International Journal of Life Cycle Assessment</b> |                            |                                   |                                        |
| 2014                                                  | 111                        | 31                                | 28%                                    |
| 2015                                                  | 78                         | 26                                | 33%                                    |
| 2016                                                  | 64                         | 17                                | 27%                                    |
| 2017                                                  | 103                        | 35                                | 34%                                    |
| 2018 (Jan-Aug)                                        | 70                         | 19                                | 27%                                    |

Table S8. Reported uncertainty analysis in LCA case studies in the International Journal of Life Cycle Assessment from 2014-2018. Note that 2018 only includes 8 months. See supplementary file A for complete list of citations.

|                                      | Number of studies reviewed | Studies with uncertainty analysis | % of studies with uncertainty analysis |
|--------------------------------------|----------------------------|-----------------------------------|----------------------------------------|
| <b>Journal of Cleaner Production</b> |                            |                                   |                                        |
| 2014                                 | 176                        | 35                                | 20%                                    |
| 2015                                 | 229                        | 40                                | 17%                                    |
| 2016                                 | 339                        | 63                                | 19%                                    |
| 2017                                 | 403                        | 50                                | 12%                                    |
| 2018 (Jan-Aug)                       | 279                        | 57                                | 20%                                    |

Table S9. Reported uncertainty analysis in LCA case studies in Journal of Cleaner Production from 2014-2018. Note that 2018 only includes 8 months. See supplementary file A for complete list of citations.

|                       | Number of studies reviewed | Studies with uncertainty analysis | % of studies with uncertainty analysis |
|-----------------------|----------------------------|-----------------------------------|----------------------------------------|
| <b>Sustainability</b> |                            |                                   |                                        |
| 2014                  | 8                          | 0                                 | 0%                                     |
| 2015                  | 21                         | 0                                 | 0%                                     |
| 2016                  | 36                         | 4                                 | 11%                                    |
| 2017                  | 40                         | 4                                 | 10%                                    |
| 2018 (Jan-Aug)        | 42                         | 1                                 | 2%                                     |

Table S10. Reported uncertainty analysis in LCA case studies in Sustainability from 2014-2018. Note that 2018 only includes 8 months. See supplementary file A for complete list of citations.

|                       | Number of studies reviewed | Studies with uncertainty analysis | % of studies with uncertainty analysis |
|-----------------------|----------------------------|-----------------------------------|----------------------------------------|
| <b>Applied Energy</b> |                            |                                   |                                        |
| 2014                  | 47                         | 6                                 | 13%                                    |
| 2015                  | 55                         | 9                                 | 16%                                    |
| 2016                  | 57                         | 14                                | 25%                                    |
| 2017                  | 47                         | 9                                 | 19%                                    |
| 2018 (Jan-Aug)        | 25                         | 6                                 | 24%                                    |

Table S11. Reported uncertainty analysis in LCA case studies in Applied Energy from 2014-2018. Note that 2018 only includes 8 months. See supplementary file A for complete list of citations.

|                                         | Number of studies reviewed | Studies with uncertainty analysis | % of studies with uncertainty analysis |
|-----------------------------------------|----------------------------|-----------------------------------|----------------------------------------|
| <b>Science of the Total Environment</b> |                            |                                   |                                        |
| 2014                                    | 31                         | 3                                 | 10%                                    |
| 2015                                    | 16                         | 2                                 | 13%                                    |
| 2016                                    | 35                         | 5                                 | 14%                                    |
| 2017                                    | 38                         | 6                                 | 16%                                    |
| 2018 (Jan-Aug)                          | 54                         | 5                                 | 9%                                     |

Table S12. Reported uncertainty analysis in LCA case studies in Science of the Total Environment from 2014-2018. Note that 2018 only includes 8 months. See supplementary file A for complete list of citations.

|                                              | Number of studies reviewed | Studies with uncertainty analysis | % of studies with uncertainty analysis |
|----------------------------------------------|----------------------------|-----------------------------------|----------------------------------------|
| <b>Resources, Conservation and Recycling</b> |                            |                                   |                                        |
| 2014                                         | 20                         | 7                                 | 35%                                    |
| 2015                                         | 37                         | 4                                 | 11%                                    |
| 2016                                         | 20                         | 7                                 | 35%                                    |
| 2017                                         | 38                         | 8                                 | 21%                                    |
| 2018 (Jan-Aug)                               | 33                         | 10                                | 30%                                    |

Table S13. Reported uncertainty analysis in LCA case studies in Resources, Conservation and Recycling from 2014-2018. Note that 2018 only includes 8 months. See supplementary file A for complete list of citations.

|                                      | Number of studies reviewed | Studies with uncertainty analysis | % of studies with uncertainty analysis |
|--------------------------------------|----------------------------|-----------------------------------|----------------------------------------|
| <b>Journal of Industrial Ecology</b> |                            |                                   |                                        |
| 2014                                 | 14                         | 2                                 | 14%                                    |
| 2015                                 | 18                         | 3                                 | 17%                                    |
| 2016                                 | 36                         | 2                                 | 6%                                     |
| 2017                                 | 35                         | 6                                 | 17%                                    |
| 2018 (Jan-Aug)                       | 37                         | 12                                | 32%                                    |

Table S14. Reported uncertainty analysis in LCA case studies in Journal of Industrial Ecology from 2014-2018. Note that 2018 only includes 8 months. See supplementary file A for complete list of citations.

|                                                       | ALCA | CLCA | ALCA+CLCA |
|-------------------------------------------------------|------|------|-----------|
| <b>International Journal of Life Cycle Assessment</b> |      |      |           |
| <b>Monte Carlo-like approaches</b>                    | 65   | 1    | 1         |
| <b>Probabilistic (other than Monte Carlo)</b>         | 4    | 0    | 0         |
| <b>Taylor Series</b>                                  | 2    | 0    | 0         |
| <b>Scenario Analysis</b>                              | 11   | 1    | 1         |
| <b>Qualitative/pedigree</b>                           | 2    | 0    | 0         |
| <b>Sensitivity Analysis</b>                           | 24   | 1    | 0         |
| <b>Fuzzy Logic</b>                                    | 0    | 0    | 0         |
| <b>Bayesian</b>                                       | 0    | 0    | 0         |
| <b>Regression Analysis</b>                            | 0    | 0    | 0         |
| <b>Not Indicated/Other</b>                            | 15   | 0    | 1         |

Table S15. Types of uncertainty analysis performed in ALCA and CLCA studies in the International Journal of Life Cycle Assessment from 2014-2018. Studies that employed a combination of uncertainty analysis methods are counted under each method. See supplementary file A for complete list of citations.

|                                               | ALCA | CLCA | ALCA+CLCA |
|-----------------------------------------------|------|------|-----------|
| <b>Journal of Cleaner Production</b>          |      |      |           |
| <b>Monte Carlo-like approaches</b>            | 144  | 6    | 1         |
| <b>Probabilistic (other than Monte Carlo)</b> | 4    | 1    | 0         |
| <b>Taylor Series</b>                          | 2    | 0    | 0         |
| <b>Scenario Analysis</b>                      | 9    | 0    | 0         |
| <b>Qualitative/pedigree</b>                   | 7    | 0    | 1         |
| <b>Sensitivity Analysis</b>                   | 53   | 1    | 1         |
| <b>Fuzzy Logic</b>                            | 3    | 0    | 0         |
| <b>Bayesian</b>                               | 0    | 0    | 0         |
| <b>Regression Analysis</b>                    | 1    | 0    | 0         |
| <b>Not Indicated/Other</b>                    | 11   | 0    | 0         |

Table S16. Types of uncertainty analysis performed in ALCA and CLCA studies in Journal of Cleaner Production from 2014-2018. Studies that employed a combination of uncertainty analysis methods are counted under each method. See supplementary file A for complete list of citations.

|                                               | ALCA | CLCA | ALCA+CLCA |
|-----------------------------------------------|------|------|-----------|
| <b>Sustainability</b>                         |      |      |           |
| <b>Monte Carlo-like approaches</b>            | 5    | 0    | 0         |
| <b>Probabilistic (other than Monte Carlo)</b> | 1    | 0    | 0         |
| <b>Taylor Series</b>                          | 0    | 0    | 0         |
| <b>Scenario Analysis</b>                      | 0    | 0    | 0         |
| <b>Qualitative/pedigree</b>                   | 2    | 0    | 0         |
| <b>Sensitivity Analysis</b>                   | 1    | 0    | 0         |
| <b>Fuzzy Logic</b>                            | 0    | 0    | 0         |
| <b>Bayesian</b>                               | 0    | 0    | 0         |
| <b>Regression Analysis</b>                    | 0    | 0    | 0         |
| <b>Not Indicated/Other</b>                    | 0    | 0    | 0         |

Table S17. Types of uncertainty analysis performed in ALCA and CLCA studies in Sustainability from 2014-2018. Studies that employed a combination of uncertainty analysis methods are counted under each method. See supplementary file A for complete list of citations.

|                                               | ALCA | CLCA | ALCA+CLCA |
|-----------------------------------------------|------|------|-----------|
| <b>Applied Energy</b>                         |      |      |           |
| <b>Monte Carlo-like approaches</b>            | 23   | 3    | 0         |
| <b>Probabilistic (other than Monte Carlo)</b> | 5    | 0    | 0         |
| <b>Taylor Series</b>                          | 0    | 0    | 0         |
| <b>Scenario Analysis</b>                      | 3    | 0    | 0         |
| <b>Qualitative/pedigree</b>                   | 0    | 0    | 0         |
| <b>Sensitivity Analysis</b>                   | 6    | 1    | 0         |
| <b>Fuzzy Logic</b>                            | 0    | 0    | 0         |
| <b>Bayesian</b>                               | 0    | 0    | 0         |
| <b>Regression Analysis</b>                    | 0    | 0    | 0         |
| <b>Not Indicated/Other</b>                    | 3    | 0    | 0         |

Table S18. Types of uncertainty analysis performed in ALCA and CLCA studies in Applied Energy from 2014-2018. Studies that employed a combination of uncertainty analysis methods are counted under each method. See supplementary file A for complete list of citations.

|                                               | ALCA | CLCA | ALCA+CLCA |
|-----------------------------------------------|------|------|-----------|
| <b>Science of the Total Environment</b>       |      |      |           |
| <b>Monte Carlo-like approaches</b>            | 17   | 0    | 0         |
| <b>Probabilistic (other than Monte Carlo)</b> | 0    | 1    | 0         |
| <b>Taylor Series</b>                          | 0    | 0    | 0         |
| <b>Scenario Analysis</b>                      | 1    | 0    | 0         |
| <b>Qualitative/pedigree</b>                   | 0    | 0    | 0         |
| <b>Sensitivity Analysis</b>                   | 0    | 0    | 0         |
| <b>Fuzzy Logic</b>                            | 0    | 0    | 0         |
| <b>Bayesian</b>                               | 0    | 0    | 0         |
| <b>Regression Analysis</b>                    | 0    | 0    | 0         |
| <b>Not Indicated/Other</b>                    | 2    | 0    | 0         |

Table S19. Types of uncertainty analysis performed in ALCA and CLCA studies in Science of the Total Environment from 2014-2018. Studies that employed a combination of uncertainty analysis methods are counted under each method. See supplementary file A for complete list of citations.

|                                               | ALCA | CLCA | ALCA+CLCA |
|-----------------------------------------------|------|------|-----------|
| <b>Resources, Conservation and Recycling</b>  |      |      |           |
| <b>Monte Carlo-like approaches</b>            | 17   | 1    | 0         |
| <b>Probabilistic (other than Monte Carlo)</b> | 1    | 0    | 0         |
| <b>Taylor Series</b>                          | 0    | 0    | 0         |
| <b>Scenario Analysis</b>                      | 5    | 1    | 0         |
| <b>Qualitative/pedigree</b>                   | 0    | 0    | 0         |
| <b>Sensitivity Analysis</b>                   | 6    | 1    | 0         |
| <b>Fuzzy Logic</b>                            | 1    | 0    | 0         |
| <b>Bayesian</b>                               | 0    | 0    | 0         |
| <b>Regression Analysis</b>                    | 0    | 0    | 0         |
| <b>Not Indicated/Other</b>                    | 3    | 0    | 0         |

Table S20. Types of uncertainty analysis performed in ALCA and CLCA studies in Resources, Conservation and Recycling from 2014-2018. Studies that employed a combination of uncertainty analysis methods are counted under each method. See supplementary file A for complete list of citations.

|                                        | ALCA | CLCA | ALCA+CLCA |
|----------------------------------------|------|------|-----------|
| <b>Journal of Industrial Ecology</b>   |      |      |           |
| Monte Carlo-like approaches            | 14   | 1    | 0         |
| Probabilistic (other than Monte Carlo) | 1    | 0    | 0         |
| Taylor Series                          | 0    | 0    | 0         |
| Scenario Analysis                      | 1    | 0    | 1         |
| Qualitative/pedigree                   | 2    | 0    | 0         |
| Sensitivity Analysis                   | 3    | 0    | 0         |
| Fuzzy Logic                            | 0    | 0    | 0         |
| Bayesian                               | 0    | 0    | 0         |
| Regression Analysis                    | 0    | 0    | 0         |
| Not Indicated/Other                    | 2    | 0    | 0         |

Table S21. Types of uncertainty analysis performed in ALCA and CLCA studies in Journal of Industrial Ecology from 2014-2018. Studies that employed a combination of uncertainty analysis methods are counted under each method. See supplementary file A for complete list of citations.

|                                                                                                        |      | Studies with uncertainty analysis | Studies with no uncertainty analysis | Total number of studies |
|--------------------------------------------------------------------------------------------------------|------|-----------------------------------|--------------------------------------|-------------------------|
| <b>International Journal of Life Cycle Assessment</b>                                                  |      |                                   |                                      |                         |
| <b>Thermal energy, electricity, semi-finished products, working material, waste treatment services</b> | ALCA | 29%                               | 71%                                  | 289                     |
|                                                                                                        | CLCA | 29%                               | 71%                                  | 14                      |
| <b>Transport</b>                                                                                       | ALCA | 30%                               | 70%                                  | 27                      |
|                                                                                                        | CLCA | 0%                                | 0%                                   | 0                       |
| <b>Infrastructure</b>                                                                                  | ALCA | 46%                               | 54%                                  | 39                      |
|                                                                                                        | CLCA | 50%                               | 50%                                  | 2                       |
| <b>Primary energy carriers, metals, salts</b>                                                          | ALCA | 29%                               | 71%                                  | 49                      |
|                                                                                                        | CLCA | 14%                               | 86%                                  | 7                       |

Table S22. Number of studies in the International Journal of Life Cycle Assessment that either did or did not perform uncertainty analysis, categorized by the major industrial sectors with defined base uncertainty values (Frischknecht et al 2005). Percentages refer to how much of the total of each sector either performed or did not perform uncertainty analysis. Within each sector, papers are further subdivided by LCA type; CLCA in this case refers to all LCA studies that employed consequential modeling, including combination ALCA/CLCA studies.

|                                                                                                        |             | <b>Studies with uncertainty analysis</b> | <b>Studies with no uncertainty analysis</b> | <b>Total number of studies</b> |
|--------------------------------------------------------------------------------------------------------|-------------|------------------------------------------|---------------------------------------------|--------------------------------|
| <b>Journal of Cleaner Production</b>                                                                   |             |                                          |                                             |                                |
| <b>Thermal energy, electricity, semi-finished products, working material, waste treatment services</b> | <b>ALCA</b> | 16%                                      | 84%                                         | 1014                           |
|                                                                                                        | <b>CLCA</b> | 16%                                      | 84%                                         | 43                             |
| <b>Transport</b>                                                                                       | <b>ALCA</b> | 17%                                      | 83%                                         | 75                             |
|                                                                                                        | <b>CLCA</b> | 17%                                      | 83%                                         | 6                              |
| <b>Infrastructure</b>                                                                                  | <b>ALCA</b> | 19%                                      | 81%                                         | 154                            |
|                                                                                                        | <b>CLCA</b> | 8%                                       | 92%                                         | 13                             |
| <b>Primary energy carriers, metals, salts</b>                                                          | <b>ALCA</b> | 30%                                      | 70%                                         | 115                            |
|                                                                                                        | <b>CLCA</b> | 7%                                       | 93%                                         | 15                             |

*Table S23. Number of studies in Journal of Cleaner Production that either did or did not perform uncertainty analysis, categorized by the major industrial sectors with defined base uncertainty values (Frischknecht et al 2005). Percentages refer to how much of the total of each sector either performed or did not perform uncertainty analysis. Within each sector, papers are further subdivided by LCA type; CLCA in this case refers to all LCA studies that employed consequential modeling, including combination ALCA/CLCA studies.*

|                                                                                                        |             | <b>Studies with uncertainty analysis</b> | <b>Studies with no uncertainty analysis</b> | <b>Total number of studies</b> |
|--------------------------------------------------------------------------------------------------------|-------------|------------------------------------------|---------------------------------------------|--------------------------------|
| <b>Sustainability</b>                                                                                  |             |                                          |                                             |                                |
| <b>Thermal energy, electricity, semi-finished products, working material, waste treatment services</b> | <b>ALCA</b> | 8%                                       | 92%                                         | 100                            |
|                                                                                                        | <b>CLCA</b> | 0%                                       | 100%                                        | 4                              |
| <b>Transport</b>                                                                                       | <b>ALCA</b> | 0%                                       | 100%                                        | 8                              |
|                                                                                                        | <b>CLCA</b> | 0%                                       | 0%                                          | 0                              |
| <b>Infrastructure</b>                                                                                  | <b>ALCA</b> | 0%                                       | 100%                                        | 27                             |
|                                                                                                        | <b>CLCA</b> | 0%                                       | 100%                                        | 3                              |
| <b>Primary energy carriers, metals, salts</b>                                                          | <b>ALCA</b> | 11%                                      | 89%                                         | 9                              |
|                                                                                                        | <b>CLCA</b> | 0%                                       | 100%                                        | 6                              |

*Table S24. Number of studies in Sustainability that either did or did not perform uncertainty analysis, categorized by the major industrial sectors with defined base uncertainty values (Frischknecht et al 2005). Percentages refer to how much of the total of each sector either performed or did not perform uncertainty analysis. Within each sector, papers are further subdivided by LCA type; CLCA in this case refers to all LCA studies that employed consequential modeling, including combination ALCA/CLCA studies.*



|                                                                                                        |             | <b>Studies with uncertainty analysis</b> | <b>Studies with no uncertainty analysis</b> | <b>Total number of studies</b> |
|--------------------------------------------------------------------------------------------------------|-------------|------------------------------------------|---------------------------------------------|--------------------------------|
| <b>Applied Energy</b>                                                                                  |             |                                          |                                             |                                |
| <b>Thermal energy, electricity, semi-finished products, working material, waste treatment services</b> | <b>ALCA</b> | 21%                                      | 79%                                         | 107                            |
|                                                                                                        | <b>CLCA</b> | 17%                                      | 83%                                         | 6                              |
| <b>Transport</b>                                                                                       | <b>ALCA</b> | 19%                                      | 81%                                         | 26                             |
|                                                                                                        | <b>CLCA</b> | 50%                                      | 50%                                         | 2                              |
| <b>Infrastructure</b>                                                                                  | <b>ALCA</b> | 10%                                      | 90%                                         | 10                             |
|                                                                                                        | <b>CLCA</b> | 0%                                       | 0%                                          | 0                              |
| <b>Primary energy carriers, metals, salts</b>                                                          | <b>ALCA</b> | 20%                                      | 80%                                         | 82                             |
|                                                                                                        | <b>CLCA</b> | 11%                                      | 89%                                         | 9                              |

*Table S25. Number of studies in Applied Energy that either did or did not perform uncertainty analysis, categorized by the major industrial sectors with defined base uncertainty values (Frischknecht et al 2005). Percentages refer to how much of the total of each sector either performed or did not perform uncertainty analysis. Within each sector, papers are further subdivided by LCA type; CLCA in this case refers to all LCA studies that employed consequential modeling, including combination ALCA/CLCA studies.*

|                                                                                                        |             | <b>Studies with uncertainty analysis</b> | <b>Studies with no uncertainty analysis</b> | <b>Total number of studies</b> |
|--------------------------------------------------------------------------------------------------------|-------------|------------------------------------------|---------------------------------------------|--------------------------------|
| <b>Science of the Total Environment</b>                                                                |             |                                          |                                             |                                |
| <b>Thermal energy, electricity, semi-finished products, working material, waste treatment services</b> | <b>ALCA</b> | 11%                                      | 89%                                         | 138                            |
|                                                                                                        | <b>CLCA</b> | 0%                                       | 100%                                        | 7                              |
| <b>Transport</b>                                                                                       | <b>ALCA</b> | 0%                                       | 100%                                        | 1                              |
|                                                                                                        | <b>CLCA</b> | 0%                                       | 0%                                          | 0                              |
| <b>Infrastructure</b>                                                                                  | <b>ALCA</b> | 0%                                       | 100%                                        | 7                              |
|                                                                                                        | <b>CLCA</b> | 0%                                       | 0%                                          | 0                              |
| <b>Primary energy carriers, metals, salts</b>                                                          | <b>ALCA</b> | 28%                                      | 72%                                         | 82                             |
|                                                                                                        | <b>CLCA</b> | 17%                                      | 83%                                         | 6                              |

*Table S26. Number of studies in Science of the Total Environment that either did or did not perform uncertainty analysis, categorized by the major industrial sectors with defined base uncertainty values (Frischknecht et al 2005). Percentages refer to how much of the total of each sector either performed or did not perform uncertainty analysis. Within each sector, papers are further subdivided by LCA type; CLCA in this case refers to all LCA studies that employed consequential modeling, including combination ALCA/CLCA studies.*

|                                                                                                        |             | Studies with uncertainty analysis | Studies with no uncertainty analysis | Total number of studies |
|--------------------------------------------------------------------------------------------------------|-------------|-----------------------------------|--------------------------------------|-------------------------|
| <b>Resources, Conservation and Recycling</b>                                                           |             |                                   |                                      |                         |
| <b>Thermal energy, electricity, semi-finished products, working material, waste treatment services</b> | <b>ALCA</b> | 21%                               | 79%                                  | 104                     |
|                                                                                                        | <b>CLCA</b> | 30%                               | 70%                                  | 10                      |
| <b>Transport</b>                                                                                       | <b>ALCA</b> | 67%                               | 33%                                  | 6                       |
|                                                                                                        | <b>CLCA</b> | 0%                                | 0%                                   | 0                       |
| <b>Infrastructure</b>                                                                                  | <b>ALCA</b> | 62%                               | 38%                                  | 8                       |
|                                                                                                        | <b>CLCA</b> | 0%                                | 0%                                   | 0                       |
| <b>Primary energy carriers, metals, salts</b>                                                          | <b>ALCA</b> | 31%                               | 69%                                  | 13                      |
|                                                                                                        | <b>CLCA</b> | 0%                                | 100%                                 | 2                       |

*Table S27. Number of studies in Resources, Conservation and Recycling that either did or did not perform uncertainty analysis, categorized by the major industrial sectors with defined base uncertainty values (Frischknecht et al 2005). Percentages refer to how much of the total of each sector either performed or did not perform uncertainty analysis. Within each sector, papers are further subdivided by LCA type; CLCA in this case refers to all LCA studies that employed consequential modeling, including combination ALCA/CLCA studies.*

|                                                                                                        |             | <b>Studies with uncertainty analysis</b> | <b>Studies with no uncertainty analysis</b> | <b>Total number of studies</b> |
|--------------------------------------------------------------------------------------------------------|-------------|------------------------------------------|---------------------------------------------|--------------------------------|
| <b>Journal of Industrial Ecology</b>                                                                   |             |                                          |                                             |                                |
| <b>Thermal energy, electricity, semi-finished products, working material, waste treatment services</b> | <b>ALCA</b> | 20%                                      | 80%                                         | 89                             |
|                                                                                                        | <b>CLCA</b> | 12%                                      | 88%                                         | 17                             |
| <b>Transport</b>                                                                                       | <b>ALCA</b> | 21%                                      | 79%                                         | 14                             |
|                                                                                                        | <b>CLCA</b> | 50%                                      | 50%                                         | 2                              |
| <b>Infrastructure</b>                                                                                  | <b>ALCA</b> | 18%                                      | 82%                                         | 11                             |
|                                                                                                        | <b>CLCA</b> | 0%                                       | 0%                                          | 0                              |
| <b>Primary energy carriers, metals, salts</b>                                                          | <b>ALCA</b> | 33%                                      | 67%                                         | 6                              |
|                                                                                                        | <b>CLCA</b> | 0%                                       | 100%                                        | 3                              |

*Table S28. Number of studies in Journal of Industrial Ecology that either did or did not perform uncertainty analysis, categorized by the major industrial sectors with defined base uncertainty values (Frischknecht et al 2005). Percentages refer to how much of the total of each sector either performed or did not perform uncertainty analysis. Within each sector, papers are further subdivided by LCA type; CLCA in this case refers to all LCA studies that employed consequential modeling, including combination ALCA/CLCA studies.*
